# Supplementary material
Source: PubMed Central journal article supplement (PMC5995268)
Supplement: Supp_Fig1.pdf [file Supp_Fig1.pdf]

# Supplementary Data

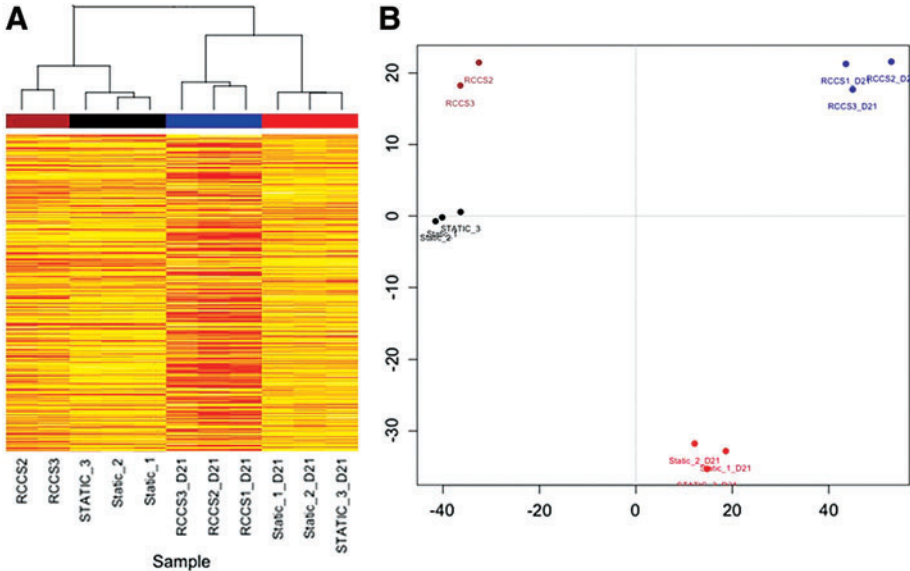

**SUPPLEMENTARY FIG. S1.** Microarray analysis in an iPSC<sup>Kit-Cre</sup> model of microgravity-induced cardiomyopathy. **(A)** Hierarchical clustering of 11 samples on 41345 genes that differentially express among groups. **(B)** Principal component analysis of 11 samples on 41345 genes, samples belonging to a group cluster together and four groups are well separated from each other. iPSC, induced pluripotent stem cells.
