# Supplementary material
Source: PubMed Central journal article supplement (PMC5995268)
Supplement: Supp_Fig2.pdf [file Supp_Fig2.pdf]

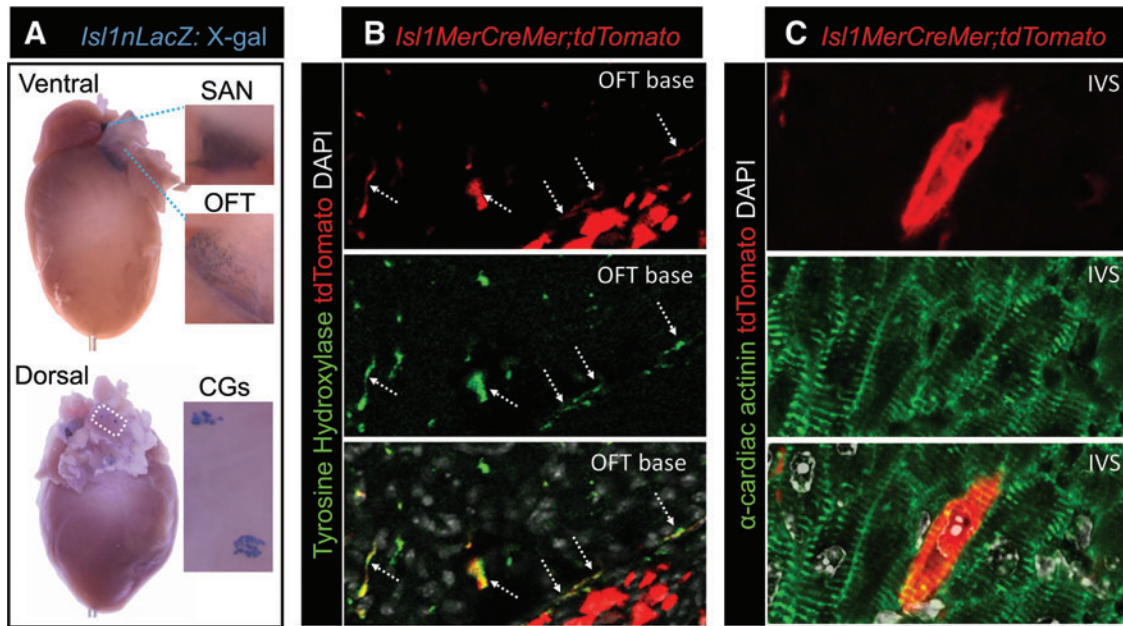

**SUPPLEMENTARY FIG. S2.** Lineage and fate of *Isl-1*<sup>+</sup> cells in the adult heart. **(A)** Ventral and dorsal views of an adult *Isl1nLacZ* heart stained for X-gal. X-gal<sup>+</sup> cells are found in the SAN, OFT, and CGs. **(B, C)** Fate mapping of postnatal *Isl-1*<sup>+</sup> cells with a tamoxifen-inducible *Isl1MerCreMer;tdTomato* reporter mouse line, indicate that postnatal *Isl-1*<sup>+</sup> cardiac cells contribute extensively to tyrosine hydroxylase<sup>+</sup> cardiac sympathetic nerves **(B, arrows)**, and rare ventricular cardiomyocytes **(C)**. IVS, interventricular septal myocardium. (*n* = 3). CG, cardiac ganglia; OFT, proximal outflow tract; SAN, sinoatrial node.
