# Supplementary material
Source: PubMed Central journal article supplement (PMC5995268)
Supplement: Supp_Table1.pdf [file Supp_Table1.pdf]

SUPPLEMENTARY TABLE S1. SUMMARY  
OF DIFFERENTIALLY EXPRESSED GENES BETWEEN  
SC- AND RCCS-GROWN iPSC<sup>KIT-CRE</sup> AT EB DAY 10

| <i>Probe</i> | <i>Gene</i>   | <i>logFC</i> | <i>adj.P.Val</i> |
|--------------|---------------|--------------|------------------|
| 17363407     | Anxa1         | 2.157068701  | 0.002622435      |
| 17331162     | Col8a1        | 2.346608944  | 0.00338121       |
| 17471231     | Prmt8         | 1.841033843  | 0.00338121       |
| 17396024     | Stmn2         | 2.021344513  | 0.00338121       |
| 17362511     | Gng3          | 1.410004702  | 0.00351961       |
| 17311512     | Mal2          | 1.379220134  | 0.00351961       |
| 17254602     | Tbx4          | -2.46690778  | 0.00351961       |
| 17372725     | Aplnr         | -1.364689035 | 0.003946753      |
| 17322235     | Ctgf          | 1.303907217  | 0.003946753      |
| 17529859     | E030011O05Rik | 1.19604348   | 0.003946753      |
| 17349514     | Egr1          | 1.274364843  | 0.003946753      |
| 17463781     | Emp1          | 1.619629102  | 0.003946753      |
| 17248255     | Hba-x         | -2.109000082 | 0.003946753      |
| 17372035     | Hoxd13        | -1.551833869 | 0.003946753      |
| 17366858     | Mir669a-3     | 1.881013002  | 0.003946753      |
| 17366754     | Mir669a-8     | 1.881013002  | 0.003946753      |
| 17366766     | Mir669a-8     | 1.881013002  | 0.003946753      |
| 17366776     | Mir669a-8     | 1.881013002  | 0.003946753      |
| 17366786     | Mir669a-8     | 1.881013002  | 0.003946753      |
| 17366798     | Mir669a-8     | 1.881013002  | 0.003946753      |
| 17366822     | Mir669a-8     | 1.881013002  | 0.003946753      |
| 17366834     | Mir669a-8     | 1.881013002  | 0.003946753      |
| 17366870     | Mir669a-8     | 1.881013002  | 0.003946753      |
| 17366882     | Mir669a-8     | 1.881013002  | 0.003946753      |
| 17366908     | Mir669a-8     | 1.881013002  | 0.003946753      |
| 17366920     | Mir669a-8     | 1.881013002  | 0.003946753      |
| 17202277     |               | 1.365717035  | 0.003946753      |
| 17208745     |               | 2.434779047  | 0.003946753      |
| 17204541     |               | 1.865445027  | 0.003946753      |
| 17229451     | Rgs5          | -2.081907818 | 0.003946753      |
| 17434813     | Sema3e        | 1.879255243  | 0.003946753      |
| 17499100     | Sox1          | 1.684577676  | 0.003946753      |
| 17389472     | Scg5          | 1.635298449  | 0.004093465      |
| 17205737     |               | 1.77825466   | 0.004217429      |
| 17219139     | Rgs5          | -1.605272396 | 0.004217429      |
| 17366874     | Mir669k       | 1.662289454  | 0.004486109      |
| 17200515     |               | 1.696063855  | 0.004486109      |
| 17344122     | 1110038B12Rik | 1.140415669  | 0.004522056      |
| 17549906     | Ahsp          | -1.707890362 | 0.004522056      |
| 17478730     | Gabbr3        | 1.572048265  | 0.004522056      |
| 17366758     | Mir669k       | 1.554523005  | 0.004522056      |
| 17366802     | Mir669k       | 1.554523005  | 0.004522056      |
| 17366838     | Mir669k       | 1.554523005  | 0.004522056      |
| 17207589     |               | 1.659200571  | 0.004522056      |
| 17301582     | Nefl          | 1.524260132  | 0.004522056      |
| 17510338     | Plvap         | -1.572073976 | 0.004522056      |
| 17239755     | Rps12         | 1.211635734  | 0.004522056      |
| 17281826     | Rtn1          | 1.272483494  | 0.004522056      |
| 17353232     | Syt4          | 2.364840107  | 0.004522056      |
| 17493212     | Prss23        | 1.780970638  | 0.005166098      |
| 17434933     | Hgf           | -1.850387492 | 0.005198359      |
| 17218277     | Nmnat2        | 1.258893179  | 0.005409183      |
| 17316390     | Rpl30         | 1.608760186  | 0.005409183      |
| 17366778     |               | 1.418376059  | 0.0056873        |
| 17466887     | Hoxa11        | -1.139666605 | 0.005851613      |
| 17417407     | Pik3r3        | 1.346753664  | 0.00606983       |
| 17434973     | Sema3c        | 2.125434437  | 0.00606983       |
| 17401036     | Nhlh2         | 1.952820568  | 0.006387913      |
| 17405047     | 2610316D01Rik | 1.078964572  | 0.006603349      |
| 17321241     | Snora34       | 1.015864674  | 0.006603349      |

(continued)

SUPPLEMENTARY TABLE S1. (CONTINUED)

| <i>Probe</i> | <i>Gene</i>   | <i>logFC</i> | <i>adj.P.Val</i> |
|--------------|---------------|--------------|------------------|
| 17427155     | Cdkn2b        | 1.218635087  | 0.007197782      |
| 17527505     | 1700017B05Rik | -0.88881018  | 0.009036567      |
| 17281350     | Clec14a       | -1.253723842 | 0.009036567      |
| 17347448     | Cyp1b1        | 1.793565114  | 0.009036567      |
| 17324402     |               | 1.799230371  | 0.009036567      |
| 17252980     | Scarf1        | -1.109024929 | 0.009036567      |
| 17398323     | Serpini1      | 1.340186062  | 0.009036567      |
| 17399533     | She           | -1.27508167  | 0.009036567      |
| 17467938     | Ctnna2        | 1.186519299  | 0.009367504      |
| 17324685     |               | 1.117211663  | 0.009367504      |
| 17213770     | A730034C02    | 1.689507938  | 0.009438242      |
| 17286830     | Edn1          | 1.590762263  | 0.009438242      |
| 17402181     | F3            | 1.691444724  | 0.009438242      |
| 17248231     | Nsg2          | 1.440791777  | 0.009438242      |
| 17202221     |               | 1.821691104  | 0.009477442      |
| 17379871     | 1500012F01Rik | 1.050157035  | 0.009663577      |
| 17450461     | Gbp4          | -1.192779471 | 0.009663577      |
| 17279724     | Macc1         | 2.221715521  | 0.009663577      |
| 17366810     | Mir669a-8     | 2.015660536  | 0.009663577      |
| 17366846     | Mir669a-8     | 2.015660536  | 0.009663577      |
| 17366814     |               | 1.353585567  | 0.009663577      |
| 17366850     |               | 1.353585567  | 0.009663577      |
| 17202527     |               | 1.618926175  | 0.009663577      |
| 17224684     | Pax3          | 2.004354654  | 0.009663577      |
| 17292967     | Pitx1         | -1.461493446 | 0.009663577      |
| 17216478     | Serpib8       | 0.992379925  | 0.009663577      |
| 17512938     | Snord111      | 1.250361916  | 0.009663577      |
| 17303067     | Gm8206        | 1.388052263  | 0.00991901       |
| 17372066     | Hoxd9         | -0.930261829 | 0.00991901       |
| 17366826     | Mir669k       | 1.354103675  | 0.00991901       |
| 17366790     |               | 1.354103675  | 0.00991901       |
| 17529855     | Zbtb38        | 1.100774855  | 0.00995483       |
| 17332358     | Erg           | -1.624073459 | 0.010431206      |
| 17296731     | Gm5796        | 0.874554875  | 0.010567375      |
| 17204765     |               | 1.417823126  | 0.010567375      |
| 17360109     | Ina           | 1.763829175  | 0.010917738      |
| 17453819     | Serpine1      | 1.398091421  | 0.010917738      |
| 17429191     | Mpl           | -1.087809679 | 0.010982601      |
| 17280327     | Rsad2         | -0.982788863 | 0.011023488      |
| 17475342     | Tgfb1         | -1.065243705 | 0.011295355      |
| 17326541     | Vgll3         | 1.149852993  | 0.011423895      |
| 17499874     | Thsd1         | -1.234806357 | 0.011436855      |
| 17410729     | Bmpr1b        | 1.449209907  | 0.011457482      |
| 17439464     | Anxa3         | 1.034269975  | 0.011978406      |
| 17268227     | Abi3          | -1.073992915 | 0.012544494      |
| 17378799     | Gm20412       | -0.919242654 | 0.012806374      |
| 17207069     |               | 1.635107378  | 0.01284677       |
| 17394772     |               | 2.207858735  | 0.01284677       |
| 17221191     | Snord87       | 0.895745211  | 0.01284677       |
| 17309675     | Zic5          | 1.204494518  | 0.01284677       |
| 17210013     |               | 1.674272961  | 0.012887328      |
| 17243839     | Ascl1         | 2.051699788  | 0.013089888      |
| 17331828     | Cldn8         | 1.454391421  | 0.013135778      |
| 17231272     | 4631405K08Rik | 1.32152925   | 0.013276989      |
| 17491396     | Dbx1          | 1.281627487  | 0.013313022      |
| 17362028     | Gm14964       | 1.147073123  | 0.014190021      |
| 17244843     | Syt1          | 1.535118569  | 0.014190021      |
| 17270999     | Ddx5          | 1.398431832  | 0.014247687      |
| 17270937     | Pecam1        | -1.207296568 | 0.014400559      |
| 17315519     | Hoxc6         | -1.143235454 | 0.014651594      |
| 17512872     | Calb2         | 1.726367637  | 0.01477441       |
| 17549568     | Cdh5          | -1.266851361 | 0.01477441       |

(continued)

SUPPLEMENTARY TABLE S1. (CONTINUED)

| <i>Probe</i> | <i>Gene</i>    | <i>logFC</i> | <i>adj.P.Val</i> |
|--------------|----------------|--------------|------------------|
| 17549722     | Cdh5           | -1.266851361 | 0.01477441       |
| 17201601     |                | -1.044160211 | 0.01477441       |
| 17287175     | Ogn            | 1.831231433  | 0.01477441       |
| 17480515     | Map6           | 1.327425355  | 0.014877439      |
| 17203427     |                | 1.575447308  | 0.014877439      |
| 17549370     | Nsg2           | 1.095866772  | 0.015460521      |
| 17549748     | Nsg2           | 1.095866772  | 0.015460521      |
| 17527312     | Chrna3         | 1.876463499  | 0.015473565      |
| 17323755     | Cldn5          | -0.99826308  | 0.01594549       |
| 17261622     | Kcnp1          | 1.191152756  | 0.01594549       |
| 17205065     |                | 1.248579063  | 0.01594549       |
| 17209255     |                | 1.248579063  | 0.01594549       |
| 17469967     | Plxnd1         | -1.382985102 | 0.01594549       |
| 17266372     | Snord42b       | 1.216819836  | 0.01594549       |
| 17482095     | Nucb2          | 0.891874886  | 0.015947305      |
| 17213317     |                | 1.225346439  | 0.016312869      |
| 17236604     | Ntn4           | 0.929321327  | 0.016312869      |
| 17541736     | Plac1          | -0.798805721 | 0.016312869      |
| 17374488     | Thbs1          | 1.082976335  | 0.016312869      |
| 17366752     | Mir466b-2      | 1.901829901  | 0.016530938      |
| 17366764     | Mir466b-2      | 1.901829901  | 0.016530938      |
| 17262065     | Cyfp2          | 1.197346897  | 0.016995984      |
| 17235136     | Hmha1          | -0.867456008 | 0.016995984      |
| 17269085     | Krt20          | 1.863367612  | 0.016995984      |
| 17366800     | Mir669g        | 1.53080136   | 0.016995984      |
| 17366836     | Mir669g        | 1.53080136   | 0.016995984      |
| 17529227     |                | 0.920928998  | 0.017033825      |
| 17543781     | Nap112         | 1.295322186  | 0.017071154      |
| 17203245     |                | 1.629486793  | 0.01722068       |
| 17243763     | Stab2          | -0.766491372 | 0.017561485      |
| 17451431     | Tmem119        | -0.757013424 | 0.01766399       |
| 17366746     | Mir669k        | 1.439740981  | 0.01779092       |
| 17366774     | mmu-mir-466c-1 | 2.282391188  | 0.018121793      |
| 17366784     | mmu-mir-466c-1 | 2.282391188  | 0.018121793      |
| 17366820     | mmu-mir-466c-1 | 2.282391188  | 0.018121793      |
| 17211347     | Tfap2b         | 2.346529371  | 0.018121793      |
| 17478459     | Slc17a6        | 2.060629428  | 0.018259584      |
| 17291874     | Nrn1           | 1.238149632  | 0.019121382      |
| 17427147     | Cdkn2a         | 1.009360158  | 0.019331577      |
| 17273059     | Gm11772        | 1.21778471   | 0.019331577      |
| 17284839     | Itgb8          | 1.031567029  | 0.019331577      |
| 17482912     |                | -1.046997214 | 0.019331577      |
| 17477930     | Rasip1         | -1.40731272  | 0.019331577      |
| 17366716     |                | 1.127985044  | 0.019560369      |
| 17514826     | Taf1d          | 1.182108752  | 0.019560369      |
| 17339801     | Crim1          | 0.752880848  | 0.019636307      |
| 17240077     | Hey2           | -1.103512392 | 0.019636307      |
| 17387385     | Calcr1         | -1.231032801 | 0.019934023      |
| 17301536     | Ebf2           | 1.275038652  | 0.019934023      |
| 17247948     | Efemp1         | 2.193452756  | 0.019934023      |
| 17315514     | Hoxc8          | -1.326547548 | 0.019934023      |
| 17308928     | Lect1          | 1.521663406  | 0.019934023      |
| 17516707     | Mpz13          | 0.91581274   | 0.019934023      |
| 17516074     | Esam           | -0.986347933 | 0.020274824      |
| 17447610     | Msx1           | -0.872344168 | 0.020274824      |
| 17529549     | Shhg5          | 0.842745885  | 0.020274824      |
| 17514830     | Taf1d          | 1.638772964  | 0.020456809      |
| 17303504     | Cadps          | 1.179085482  | 0.02059971       |
| 17376618     | Chgb           | 1.415251584  | 0.020812048      |
| 17416162     | Dab1           | 1.151130658  | 0.020812048      |
| 17264448     | Arhgef15       | -0.734653999 | 0.020860794      |
| 17263416     | Zfp867         | 1.516038863  | 0.02096894       |

(continued)

SUPPLEMENTARY TABLE S1. (CONTINUED)

| <i>Probe</i> | <i>Gene</i>   | <i>logFC</i> | <i>adj.P.Val</i> |
|--------------|---------------|--------------|------------------|
| 17315133     | Acvrl1        | -0.808430778 | 0.021059832      |
| 17206499     |               | 0.968058631  | 0.021059832      |
| 17241709     | Phyhipl       | 1.360758598  | 0.021059832      |
| 17289432     | Zfp366        | -1.171553672 | 0.021059832      |
| 17545106     | Capn6         | -1.003683006 | 0.021098499      |
| 17445713     | Mir5109       | -0.713309423 | 0.021098499      |
| 17545121     | Dcx           | 2.133689401  | 0.021136763      |
| 17328651     |               | -0.818848717 | 0.02144336       |
| 17367216     | Plxdc2        | 1.230473292  | 0.021575626      |
| 17353378     | Epb4.114a     | 1.133977328  | 0.02175875       |
| 17248894     | Gnb2l1        | 1.047608774  | 0.02175875       |
| 17480102     | Sytl2         | 1.466552139  | 0.0219622        |
| 17459260     | E230016M11Rik | 0.905385532  | 0.022021736      |
| 17434742     | Sema3d        | 1.992764463  | 0.022021736      |
| 17463478     | BC064078      | 0.95092576   | 0.02222332       |
| 17329479     | Cldn1         | 1.076390094  | 0.02222332       |
| 17248992     | Flt4          | -1.229540906 | 0.02222332       |
| 17296896     | Gm3173        | 1.10071705   | 0.02222332       |
| 17232593     | Lama4         | -1.221836479 | 0.02222332       |
| 17275255     | Nrcam         | 1.478486125  | 0.02222332       |
| 17341080     | Thbs2         | 1.775756677  | 0.02222332       |
| 17255482     | Gm11534       | -0.943456002 | 0.022424909      |
| 17394003     |               | -1.178067935 | 0.022932363      |
| 17303147     | Gm3591        | 1.866772149  | 0.02296814       |
| 17209991     |               | 2.028029227  | 0.023286144      |
| 17443148     | Cldn3         | 0.956861839  | 0.02373562       |
| 17492051     | Arrdc4        | 0.783494681  | 0.023812766      |
| 17298090     | Erc2          | 1.092861488  | 0.023812766      |
| 17475818     | AF357399      | 1.217530432  | 0.023906469      |
| 17355332     | Dcc           | 2.135607223  | 0.023915257      |
| 17261878     | Gabrg2        | 1.333976907  | 0.023915257      |
| 17512434     | Tppp3         | 0.822736831  | 0.024027051      |
| 17501272     | Hand2         | -1.018602629 | 0.024350319      |
| 17428228     | Elav14        | 1.001006754  | 0.024622093      |
| 17470592     | Gdf3          | -0.91351371  | 0.025461988      |
| 17366788     | Mir669g       | 1.327157413  | 0.025461988      |
| 17366824     | Mir669g       | 1.327157413  | 0.025461988      |
| 17204595     |               | 1.317138808  | 0.025461988      |
| 17302490     | Scel          | 1.812131117  | 0.025461988      |
| 17261069     | O610010F05Rik | 0.425599818  | 0.025771075      |
| 17288936     | C130071C03Rik | 1.114911493  | 0.025771075      |
| 17547604     | Lgals3bp      | -1.168210621 | 0.025771075      |
| 17397511     | Lhfp          | 1.194336874  | 0.025771075      |
| 17207929     |               | 1.7455252    | 0.025771075      |
| 17248069     |               | 0.908248905  | 0.025771075      |
| 17478889     | Apba2         | 1.027885569  | 0.026508242      |
| 17207449     |               | 1.969297197  | 0.026508242      |
| 17448821     | Ociad2        | 1.40335945   | 0.026508242      |
| 17337796     | Pla2g7        | 1.033868284  | 0.026508242      |
| 17229020     | Fmo1          | -0.969525994 | 0.027216303      |
| 17204775     |               | 1.361085801  | 0.027216303      |
| 17324394     | Snord2        | 1.188799394  | 0.027216303      |
| 17326801     | Jam2          | 1.310686109  | 0.027279251      |
| 17432927     | Fbxo44        | 0.700706884  | 0.02741336       |
| 17296953     | Gm8281        | 0.732680564  | 0.02741336       |
| 17354132     | Jakmip2       | 1.346501769  | 0.02741336       |
| 17203021     |               | 1.144377726  | 0.02741336       |
| 17481682     |               | 1.166064849  | 0.027498438      |
| 17303677     | Gm3173        | 0.978887658  | 0.027504559      |
| 17545225     |               | 1.088776733  | 0.027661924      |
| 17315507     | Hoxc9         | -0.988491975 | 0.027733835      |
| 17235292     | Rps15         | -1.053644948 | 0.027733835      |

(continued)

SUPPLEMENTARY TABLE S1. (CONTINUED)

| <i>Probe</i> | <i>Gene</i>   | <i>logFC</i> | <i>adj.P.Val</i> |
|--------------|---------------|--------------|------------------|
| 17337770     | Gpr116        | -1.472394545 | 0.028054437      |
| 17302523     | Slain1        | 0.890918089  | 0.028120006      |
| 17403605     | Eltf1         | -1.405692582 | 0.028315207      |
| 17229813     | Nhlh1         | 1.569037886  | 0.028407098      |
| 17203323     |               | 1.54324985   | 0.028813305      |
| 17210397     |               | 1.064842627  | 0.028854978      |
| 17447615     | Nsg1          | 1.348871624  | 0.028880929      |
| 17381056     | Tpd52l2       | 1.233613104  | 0.029005191      |
| 17366898     |               | 1.881749861  | 0.029137913      |
| 17293103     | Gkap1         | 0.912308869  | 0.029652249      |
| 17366856     | Mir466b-2     | 1.14915615   | 0.029652249      |
| 17202993     |               | 1.415807435  | 0.02981454       |
| 17204389     |               | 1.571090526  | 0.029894837      |
| 17537209     | Pou3f4        | 1.103820923  | 0.029894837      |
| 17202819     |               | 1.683977337  | 0.029911337      |
| 17423631     | Pou3f2        | 1.718648348  | 0.029911337      |
| 17383413     | Gfi1b         | -1.300229993 | 0.030296922      |
| 17226473     | Tmem163       | 1.391738637  | 0.03084158       |
| 17461205     | Chl1          | 2.158989115  | 0.030917231      |
| 17522319     | Cspg5         | 0.867832052  | 0.030917231      |
| 17522280     | Gm10615       | 0.942687833  | 0.030917231      |
| 17446580     | Shh           | 1.3329808    | 0.030917231      |
| 17346503     | Tubb4a        | 1.375772788  | 0.030917231      |
| 17243382     | Gna15         | -0.883480758 | 0.031100211      |
| 17209833     |               | 1.189527777  | 0.031100211      |
| 17506631     | Tubb3         | 1.691209262  | 0.031100211      |
| 17204757     |               | 1.734035046  | 0.031103936      |
| 17261750     | Wwc1          | 0.839167164  | 0.031103936      |
| 17309041     | Dach1         | 1.74898515   | 0.031251094      |
| 17297849     | Duxbl1        | 0.928499571  | 0.031251094      |
| 17494240     | Hbb-bh1       | -2.039397075 | 0.031251094      |
| 17296355     | Itga2         | -0.717409152 | 0.031251094      |
| 17429632     | Mfsd2a        | 1.178090657  | 0.031251094      |
| 17232215     | Moxd1         | 0.797313035  | 0.031251094      |
| 17200387     |               | 1.097361382  | 0.031251094      |
| 17366812     |               | 1.395129086  | 0.031251094      |
| 17366848     |               | 1.395129086  | 0.031251094      |
| 17419741     | Slc30a2       | -0.68842985  | 0.031251094      |
| 17277387     | Fos           | 1.054995468  | 0.031265776      |
| 17261272     | Rps27a        | 0.821501909  | 0.031437769      |
| 17376272     | Nop56         | 1.116802439  | 0.031612107      |
| 17201057     |               | 0.878952096  | 0.031730634      |
| 17514822     | Taf1d         | 1.48780615   | 0.031730634      |
| 17208599     |               | 1.287791534  | 0.031787231      |
| 17203003     |               | 1.291529339  | 0.031787231      |
| 17350090     | Sh3rf2        | 0.710448823  | 0.031787231      |
| 17305163     | 2610528A11Rik | -1.380549499 | 0.032080099      |
| 17341179     | Dll1          | 0.796507174  | 0.032096659      |
| 17265672     | Spns2         | -0.673178932 | 0.032548413      |
| 17450091     | 5430416N02Rik | 0.74777435   | 0.032650335      |
| 17231477     | Myct1         | -0.752174004 | 0.032650335      |
| 17467522     |               | -0.88276806  | 0.032650335      |
| 17275830     |               | 0.65037759   | 0.032650335      |
| 17535076     | Zic3          | 0.899771418  | 0.032650335      |
| 17362521     | 5730408K05Rik | 0.853005244  | 0.032718426      |
| 17296715     | Gm3373        | 0.827682825  | 0.033073049      |
| 17358103     | Aldh1a1       | 1.737496178  | 0.033348573      |
| 17310530     | Cdh10         | 1.440572074  | 0.033348573      |
| 17310515     | Cdh9          | 0.71916232   | 0.033348573      |
| 17348902     | Dtna          | 1.36143243   | 0.033348573      |
| 17549374     | Dvl2          | -0.852402438 | 0.033348573      |
| 17549750     | Dvl2          | -0.852402438 | 0.033348573      |

(continued)

SUPPLEMENTARY TABLE S1. (CONTINUED)

| <i>Probe</i> | <i>Gene</i>   | <i>logFC</i> | <i>adj.P.Val</i> |
|--------------|---------------|--------------|------------------|
| 17383816     | Gm13609       | -0.908566933 | 0.033348573      |
| 17518316     |               | 1.320736735  | 0.033348573      |
| 17366890     |               | 2.156613005  | 0.033348573      |
| 17528878     | Scg3          | 2.119175401  | 0.033348573      |
| 17258642     | Snord1b       | 1.526188876  | 0.033348573      |
| 17328153     | Zc3h7a        | 0.658842646  | 0.033348573      |
| 17373943     | Pax6          | 1.620629144  | 0.033764769      |
| 17291935     | Gm10129       | -0.875929744 | 0.033966988      |
| 17204663     |               | 1.839317957  | 0.033966988      |
| 17386569     | Chn1          | 0.7683703    | 0.033997339      |
| 17275955     | Atf1          | 0.756041121  | 0.03417018       |
| 17376677     | Bmp2          | -0.837273228 | 0.03417018       |
| 17211294     | Gdap1         | 1.114151136  | 0.03417018       |
| 17444804     | LOC100505283  | 0.926909193  | 0.03417018       |
| 17205633     |               | 1.213157242  | 0.03417018       |
| 17407337     |               | 1.459411888  | 0.03417018       |
| 17202159     |               | 1.451152895  | 0.03417018       |
| 17278209     | Ppp4r4        | 1.272049898  | 0.03417018       |
| 17512940     | Sf3b3         | 1.352395598  | 0.03417018       |
| 17346018     | Slc5a7        | 0.869950392  | 0.03417018       |
| 17483383     | Snora30       | 0.621808588  | 0.03417018       |
| 17529679     | Zic1          | 1.702226998  | 0.03417018       |
| 17222650     | Uxs1          | 0.813335556  | 0.034264131      |
| 17353699     | Hbegf         | 0.749310963  | 0.034351681      |
| 17547616     | Hba-a1        | -1.431797757 | 0.034378547      |
| 17319403     | Rpl3          | 1.026211467  | 0.034615878      |
| 17204999     |               | 0.933060069  | 0.034637481      |
| 17515103     | 1700084C06Rik | -0.932542109 | 0.034757057      |
| 17376026     | Tmem87b       | 0.694120812  | 0.035293993      |
| 17294565     | Gpr98         | 0.901107397  | 0.035405552      |
| 17429206     | Tie1          | -1.349494279 | 0.035405552      |
| 17377857     | Ccm2l         | -0.761177466 | 0.035695901      |
| 17250162     | Hist3h2ba     | 1.584792487  | 0.035777612      |
| 17466805     | Hoxa2         | 1.763319832  | 0.035777612      |
| 17288234     |               | -0.831972003 | 0.035777612      |
| 17282743     | Tgfb3         | 1.447677202  | 0.035777612      |
| 17518191     | Itga11        | 1.108059699  | 0.03582442       |
| 17248276     | Hba-a2        | -1.526714614 | 0.035958133      |
| 17204523     |               | 1.293702935  | 0.036485102      |
| 17525617     | Robo3         | 0.790263989  | 0.036485102      |
| 17279167     | Eif5          | 1.04480278   | 0.0369489        |
| 17472343     |               | 0.942482311  | 0.0369489        |
| 17279168     |               | 1.04480278   | 0.0369489        |
| 17202087     |               | 1.185334575  | 0.0369489        |
| 17349503     | Reep2         | 0.949894864  | 0.0369489        |
| 17406450     | Snord73a      | 1.557505153  | 0.037169869      |
| 17423923     | 3110043O21Rik | 0.785197624  | 0.03722855       |
| 17288442     | Irx2          | 0.61715064   | 0.03722855       |
| 17422988     | Rps20         | 0.899583977  | 0.03722855       |
| 17263063     | 2010001A14Rik | -1.115362344 | 0.037440448      |
| 17376423     | Hspa12b       | -0.75413825  | 0.037461953      |
| 17234691     | Sumo3         | 1.109679792  | 0.037461953      |
| 17330684     | Tagln3        | 0.769964527  | 0.037461953      |
| 17350901     | A730017C20Rik | 1.838836086  | 0.037486316      |
| 17314190     | Shank3        | -0.65065541  | 0.037728482      |
| 17549422     | Kifc2         | -1.224468979 | 0.03777492       |
| 17549812     | Kifc2         | -1.224468979 | 0.03777492       |
| 17202131     |               | -1.803011336 | 0.03777492       |
| 17204713     |               | 0.879839054  | 0.03777492       |
| 17328040     |               | -0.929417606 | 0.038149197      |
| 17415813     |               | 1.30462856   | 0.03815092       |
| 17509591     | Tll1          | 0.914424604  | 0.03815092       |

(continued)

SUPPLEMENTARY TABLE S1. (CONTINUED)

| <i>Probe</i> | <i>Gene</i>   | <i>logFC</i> | <i>adj.P.Val</i> |
|--------------|---------------|--------------|------------------|
| 17312054     | Khdrbs3       | 0.935824548  | 0.038209185      |
| 17269974     | Meox1         | 1.914464904  | 0.038286911      |
| 17204489     |               | 1.145445483  | 0.038286911      |
| 17297817     | Duxbl1        | 0.845024989  | 0.03844751       |
| 17320583     | Cpne8         | 1.413705242  | 0.03855573       |
| 17233384     | Fabp7         | 2.349527039  | 0.03855573       |
| 17448924     | Kdr           | -1.592994257 | 0.03855573       |
| 17288946     | C130071C03Rik | 1.737696064  | 0.039200743      |
| 17516047     | Robo4         | -0.733294056 | 0.039443562      |
| 17233306     | Slc35f1       | 1.687113876  | 0.03983202       |
| 17512361     | Exoc3l        | -0.62010238  | 0.040423855      |
| 17466863     | Hoxa9         | -0.734109043 | 0.040423855      |
| 17246860     | Nipsnap1      | 0.822454275  | 0.040423855      |
| 17356425     |               | 1.111302543  | 0.040467924      |
| 17267430     | Gdpd1         | 0.989425584  | 0.040501141      |
| 17498251     | Phlda2        | -1.465674192 | 0.040501141      |
| 17276893     | Srsf5         | 0.607245906  | 0.040501141      |
| 17202815     |               | 1.111606509  | 0.040614805      |
| 17323198     | Efcab1        | 1.015845262  | 0.040954585      |
| 17210339     |               | 0.964806716  | 0.042018178      |
| 17261250     | Ccdc104       | 0.742886317  | 0.042136141      |
| 17227515     | Nr5a2         | -0.769265553 | 0.042136141      |
| 17471879     |               | 0.978364454  | 0.042501161      |
| 17316569     | Gm16136       | 0.74695225   | 0.042776728      |
| 17237132     | Lin7a         | 1.05416926   | 0.042776728      |
| 17202735     |               | 2.206393024  | 0.043170856      |
| 17318665     | Foxh1         | -1.205048976 | 0.043887757      |
| 17208169     |               | 2.488876452  | 0.043922255      |
| 17495610     | Gprc5b        | 0.955950894  | 0.043933729      |
| 17309385     | 4930505G20Rik | 2.414854888  | 0.044105246      |
| 17266534     | Ksr1          | -0.636762655 | 0.044105246      |
| 17518314     |               | 1.503090554  | 0.044105246      |
| 17384927     | Gtdc1         | 0.545444844  | 0.044192373      |
| 17446020     |               | 1.472374838  | 0.044233318      |
| 17289382     | Gm2373        | -0.913211179 | 0.044629         |
| 17502789     | Gypa          | -1.550763708 | 0.044629         |
| 17234898     | Madcam1       | -0.698336931 | 0.044629         |
| 17296344     | Fst           | 0.815874226  | 0.044732503      |
| 17202207     |               | 1.451831654  | 0.044732503      |
| 17321094     | Col2a1        | 1.037522757  | 0.044786488      |
| 17396186     | A930005K07Rik | 0.967343148  | 0.044912858      |
| 17470031     | Alox5         | -0.930850366 | 0.044912858      |
| 17458439     | GpnmB         | 1.24436646   | 0.044912858      |
| 17550100     | Mir669a-1     | 1.328246956  | 0.044912858      |
| 17550102     | Mir669a-1     | 1.328246956  | 0.044912858      |
| 17550104     | Mir669a-1     | 1.328246956  | 0.044912858      |
| 17550106     | Mir669a-1     | 1.328246956  | 0.044912858      |
| 17550108     | Mir669a-1     | 1.328246956  | 0.044912858      |
| 17550110     | Mir669a-1     | 1.328246956  | 0.044912858      |
| 17550112     | Mir669a-1     | 1.328246956  | 0.044912858      |
| 17550114     | Mir669a-1     | 1.328246956  | 0.044912858      |
| 17550116     | Mir669a-1     | 1.328246956  | 0.044912858      |
| 17550118     | Mir669a-1     | 1.328246956  | 0.044912858      |
| 17550120     | Mir669a-1     | 1.328246956  | 0.044912858      |
| 17550122     | Mir669a-1     | 1.328246956  | 0.044912858      |
| 17550128     | Mir669a-1     | 1.328246956  | 0.044912858      |
| 17294682     | Mef2c         | -1.066918494 | 0.044983448      |
| 17200981     |               | 1.909180915  | 0.044983448      |
| 17468183     | Actg2         | 1.229274405  | 0.045168404      |
| 17292174     | Atxn1         | 0.797163606  | 0.045168404      |
| 17409075     | Csf1          | 0.777988507  | 0.045168404      |
| 17458616     | Hoxa11as      | -0.728279036 | 0.045168404      |

SUPPLEMENTARY TABLE S1. (CONTINUED)

| <i>Probe</i> | <i>Gene</i>   | <i>logFC</i> | <i>adj.P.Val</i> |
|--------------|---------------|--------------|------------------|
| 17449084     | Igfbp7        | 0.924211064  | 0.045168404      |
| 17352549     | Mpp7          | 0.683527803  | 0.045168404      |
| 17202855     |               | 1.158689852  | 0.045168404      |
| 17309368     | Slitrk6       | 1.429990229  | 0.045168404      |
| 17339967     | Tmem178       | 1.143598754  | 0.045168404      |
| 17456131     | Tes           | 0.648413508  | 0.045417006      |
| 17379875     | Snord12       | 1.278140473  | 0.046076635      |
| 17318967     |               | -1.373384981 | 0.046470853      |
| 17455307     | Cdx2          | -0.980281817 | 0.04669743       |
| 17548234     |               | 1.090056795  | 0.047024736      |
| 17523380     | 1700048O20Rik | 0.810412607  | 0.047135046      |
| 17517903     | 4930461G14Rik | -1.183705242 | 0.047135046      |
| 17379552     |               | 0.761575491  | 0.047135046      |
| 17550140     |               | 0.761575491  | 0.047135046      |
| 17349902     | Pcdhb11       | 0.59882439   | 0.047135046      |
| 17441595     | Tbx3          | -1.0162008   | 0.047135046      |
| 17270222     | Itga2b        | -0.80697414  | 0.047239014      |
| 17280493     |               | 1.162556049  | 0.047239014      |
| 17416061     | Sgip1         | 0.916120613  | 0.047239014      |
| 17526623     | Apoc3         | -0.77732355  | 0.04724606       |
| 17205369     |               | 1.425168684  | 0.047266055      |
| 17246352     | Gdf11         | 1.204286602  | 0.047319812      |
| 17305830     | Otx2          | 1.058571479  | 0.047319812      |
| 17406186     | Tdo2          | -0.791644745 | 0.047600103      |
| 17324486     | Trp63         | 0.788403439  | 0.047600103      |
| 17247471     | C1d           | 0.569565621  | 0.047717899      |
| 17382841     | C330006A16Rik | 0.811275661  | 0.047717899      |
| 17509617     | Cpe           | 1.715693259  | 0.047717899      |
| 17451126     | Ep400         | 0.645298549  | 0.047717899      |
| 17430227     | Gjb5          | -0.808519587 | 0.047717899      |
| 17335726     | Glp1r         | -1.375559493 | 0.047717899      |
| 17523705     | Gria4         | 0.755382728  | 0.047717899      |
| 17315500     | Hoxc10        | -1.303640712 | 0.047717899      |
| 17204055     |               | 0.996769185  | 0.047717899      |
| 17302054     | Snora31       | 1.026256876  | 0.047717899      |
| 17395928     | Sox18         | -1.169682992 | 0.047717899      |
| 17208927     |               | 1.337623867  | 0.047851489      |
| 17302636     | Mir19a        | 1.202351541  | 0.047948812      |
| 17508804     | Dlc1          | -0.614849735 | 0.048039086      |
| 17519568     | Gm19569       | 0.674299542  | 0.048039086      |
| 17300998     | Shisa2        | 0.905452382  | 0.048047443      |
| 17273276     | Gm17178       | -0.677580311 | 0.04824316       |
| 17305462     | Gm8127        | -0.717647206 | 0.048599714      |
| 17462219     |               | -0.787172491 | 0.048599714      |
| 17260349     | Tmed4         | 0.715998708  | 0.048599714      |
| 17221375     | Eya1          | 1.042796372  | 0.048970475      |
| 17210831     |               | 0.809723197  | 0.048995112      |
| 17290939     | Pgbd1         | 0.817635548  | 0.049269433      |
| 17297161     | 3830406C13Rik | 0.665579061  | 0.049290804      |
| 17203957     |               | 1.364532083  | 0.049556523      |
| 17357556     |               | -0.764725092 | 0.049556523      |
| 17450283     | Mapk10        | 1.663028419  | 0.049582304      |
| 17236623     | Usp44         | 1.081579721  | 0.049582304      |
| 17466003     | Zc3hav1       | -0.914175581 | 0.049582304      |

For review purposes. Related to Supplementary Table S3.  
 EB, embryoid body; iPSCs, induced pluripotent stem cells;  
 RCCS, rotary cell suspension culture system; SC, static culture.

(continued)
