# Supplementary material
Source: PubMed Central journal article supplement (PMC5995268)
Supplement: Supp_Table2.pdf [file Supp_Table2.pdf]

SUPPLEMENTARY TABLE S2. GENES IN RCCS-  
DIFFERENTIATED iPSC<sup>KIT</sup>-DERIVED EMBRYOID BODIES  
AT EB DAY 10 THAT ARE SIGNIFICANTLY  
UPREGULATED COMPARED WITH STATIC CONDITIONS

| <i>Gene</i> | <i>Adj. P value</i> |
|-------------|---------------------|
| HEY2        | 0.02                |
| MEF2C       | 0.04                |
| KDR         | 0.04                |
| HAND2       | 0.02                |
| TBX3        | 0.05                |
| CDH5        | 0.01                |
| PECAM1      | 0.01                |
| MSX1        | 0.02                |
| TGF-beta1   | 0.01                |
| Plexin-D1   | 0.02                |
| VEGFR-3     | 0.02                |
