# Supplementary material
Source: PubMed Central journal article supplement (PMC5995268)
Supplement: Supp_Table3.pdf [file Supp_Table3.pdf]

SUPPLEMENTARY TABLE S3. GENES IN RCCS-  
DIFFERENTIATED iPSC<sup>KIT</sup>-DERIVED EMBRYOID  
BODIES AT EB DAY 10 THAT ARE  
SIGNIFICANTLY DOWNREGULATED  
COMPARED WITH STATIC CONDITIONS

| <i>Gene</i> | <i>Adj. P value</i> |
|-------------|---------------------|
| SHH         | 0.03                |
| FABP        | 0.03                |
| EGR1        | 0.003               |
| HOXA2       | 0.03                |
| ZIC1        | 0.03                |
| PAX3        | 0.009               |
| Sema3C      | 0.006               |
| Sema3D      | 0.02                |
| Sema3E      | 0.003               |
| BMPR1B      | 0.01                |
| TGF-beta3   | 0.03                |
| AP-2B       | 0.02                |
| Sox1        | 0.003               |
| GDF11       | 0.04                |
| BRN4        | 0.03                |
