# Supplementary material
Source: PubMed Central journal article supplement (PMC5995268)
Supplement: Supp_Table4.pdf [file Supp_Table4.pdf]

**Table II (For Review Purposes). Summary of differentially expressed genes between SC- and RCCS-grown iPSC<sup>Kit-Cre</sup> at EB-day 10. Related to Table IV.**

| <b>probe</b> | <b>gene</b>   | <b>logFC</b> | <b>adj.P.Val</b> |
|--------------|---------------|--------------|------------------|
| 17479027     | Cers3         | 2.906053017  | 2.27E-05         |
| 17311512     | Mal2          | 2.078034517  | 2.27E-05         |
| 17516699     | Mpzl2         | 2.464897753  | 2.27E-05         |
| 17516707     | Mpzl3         | 2.517465766  | 2.27E-05         |
| 17216436     | Serpib11      | 3.414611694  | 2.27E-05         |
| 17265672     | Spns2         | 2.007937414  | 2.27E-05         |
| 17255023     | 2210409E12Rik | 3.275774182  | 2.75E-05         |
| 17506137     | Wfdc1         | 2.480119916  | 3.92E-05         |
| 17216478     | Serpib8       | 1.967886693  | 3.95E-05         |
| 17411262     | St6galnac3    | 3.04830152   | 3.95E-05         |
| 17310250     | Capsl         | 1.811072662  | 4.37E-05         |
| 17329479     | Cldn1         | 2.489830324  | 4.37E-05         |
| 17475054     | Lypd3         | 1.94248353   | 4.37E-05         |
| 17516438     | Trim29        | 2.161433164  | 4.37E-05         |
| 17491535     |               | 2.735187153  | 4.47E-05         |
| 17316569     | Gm16136       | 1.980653198  | 4.97E-05         |
| 17345016     | Gpr115        | 1.96979451   | 4.97E-05         |
| 17227094     | Adora1        | 2.090581442  | 5.00E-05         |
| 17471127     | Cd9           | 1.656370683  | 5.00E-05         |
| 17378799     | Gm20412       | -1.754794681 | 5.00E-05         |
| 17373086     | Mtch2         | 1.433284374  | 5.00E-05         |
| 17216402     | Serpib5       | 3.113075522  | 5.34E-05         |
| 17216447     | Serpib7       | 2.260866931  | 5.34E-05         |
| 17353699     | Hbegf         | 1.786391143  | 5.57E-05         |
| 17301582     | Nefl          | 2.294121976  | 5.57E-05         |
| 17366778     |               | 2.220239439  | 5.57E-05         |
| 17322261     | Atf7          | -1.581410754 | 6.36E-05         |
| 17262836     | LOC101056447  | 1.882662646  | 6.36E-05         |
| 17427746     | Prkaa2        | 2.572067537  | 6.36E-05         |
| 17366687     | Sfmbt2        | 2.648286637  | 6.36E-05         |
| 17449313     | Ugt2b34       | 2.542823286  | 6.36E-05         |
| 17303722     | Kcnk5         | 2.65949848   | 6.55E-05         |
| 17506147     | Atp2c2        | 2.447034549  | 6.67E-05         |
| 17447726     | Hs3st1        | 2.102171962  | 6.67E-05         |
| 17514460     | Pdgfd         | 1.891129995  | 6.67E-05         |
| 17263511     | Rasd1         | 2.652143152  | 6.67E-05         |
| 17316502     | Snx31         | 1.863365346  | 6.67E-05         |
| 17344122     | 1110038B12Rik | 1.5664414    | 7.97E-05         |
| 17482897     | Aqp8          | 3.122094911  | 7.97E-05         |

|          |               |              |             |
|----------|---------------|--------------|-------------|
| 17444364 | Fam220a       | 1.391396819  | 8.69E-05    |
| 17296344 | Fst           | 1.843973299  | 8.69E-05    |
| 17491539 | Ipw           | 2.095279567  | 8.69E-05    |
| 17269358 | Krt15         | 2.900583129  | 8.69E-05    |
| 17230550 | Lbr           | 1.424304845  | 8.69E-05    |
| 17231925 | Map7          | 1.584577422  | 8.69E-05    |
| 17282368 | Med6          | 1.416339839  | 8.69E-05    |
| 17366758 | Mir669k       | 2.037571387  | 8.69E-05    |
| 17366802 | Mir669k       | 2.037571387  | 8.69E-05    |
| 17366838 | Mir669k       | 2.037571387  | 8.69E-05    |
| 17391834 | Siglec1       | -2.390198223 | 8.69E-05    |
| 17491584 | Snord116      | 2.095279567  | 8.69E-05    |
| 17491586 | Snord116      | 2.095279567  | 8.69E-05    |
| 17491592 | Snord116      | 2.095279567  | 8.69E-05    |
| 17491594 | Snord116      | 2.095279567  | 8.69E-05    |
| 17491537 | Snord116l1    | 2.095279567  | 8.69E-05    |
| 17491566 | Snord116l1    | 2.095279567  | 8.69E-05    |
| 17491570 | Snord116l1    | 2.095279567  | 8.69E-05    |
| 17491572 | Snord116l1    | 2.095279567  | 8.69E-05    |
| 17491574 | Snord116l1    | 2.095279567  | 8.69E-05    |
| 17491576 | Snord116l1    | 2.095279567  | 8.69E-05    |
| 17491578 | Snord116l1    | 2.095279567  | 8.69E-05    |
| 17491580 | Snord116l1    | 2.095279567  | 8.69E-05    |
| 17491582 | Snord116l1    | 2.095279567  | 8.69E-05    |
| 17491588 | Snord116l1    | 2.095279567  | 8.69E-05    |
| 17491590 | Snord116l1    | 2.095279567  | 8.69E-05    |
| 17416758 |               | 1.246278926  | 8.69E-05    |
| 17243868 | Dram1         | 2.301915553  | 8.98E-05    |
| 17316390 | Rpl30         | 2.153087256  | 8.98E-05    |
| 17545106 | Capn6         | 1.810275478  | 9.05E-05    |
| 17410251 | Enpep         | 2.768623181  | 9.05E-05    |
| 17548094 | Gnpnat1       | 1.988027945  | 9.05E-05    |
| 17416955 | Bend5         | 2.154316399  | 9.30E-05    |
| 17508766 | Eri1          | 1.800065679  | 9.55E-05    |
| 17231272 | 4631405K08Rik | 2.087846428  | 9.93E-05    |
| 17513389 | Mphosph6      | 1.555925587  | 9.93E-05    |
| 17299465 | Naa30         | 1.589584609  | 9.93E-05    |
| 17538074 | Trap1a        | 2.10951542   | 0.000106491 |
| 17363983 | Atad1         | 1.550123114  | 0.000106721 |
| 17416566 | Magoh         | 1.294430087  | 0.000106721 |
| 17544469 | Taf7l         | 2.276555708  | 0.000106721 |
| 17416754 |               | 1.897106381  | 0.000107938 |
| 17297059 | Abhd6         | 1.753115267  | 0.00011266  |

|          |               |              |             |
|----------|---------------|--------------|-------------|
| 17225683 | 2310007B03Rik | 1.958101665  | 0.000112988 |
| 17530406 | Acpp          | 1.293514738  | 0.000112988 |
| 17492431 | Anpep         | -1.52317311  | 0.000112988 |
| 17366858 | Mir669a-3     | 2.151083992  | 0.000112988 |
| 17366754 | Mir669a-8     | 2.151083992  | 0.000112988 |
| 17366766 | Mir669a-8     | 2.151083992  | 0.000112988 |
| 17366776 | Mir669a-8     | 2.151083992  | 0.000112988 |
| 17366786 | Mir669a-8     | 2.151083992  | 0.000112988 |
| 17366798 | Mir669a-8     | 2.151083992  | 0.000112988 |
| 17366822 | Mir669a-8     | 2.151083992  | 0.000112988 |
| 17366834 | Mir669a-8     | 2.151083992  | 0.000112988 |
| 17366870 | Mir669a-8     | 2.151083992  | 0.000112988 |
| 17366882 | Mir669a-8     | 2.151083992  | 0.000112988 |
| 17366908 | Mir669a-8     | 2.151083992  | 0.000112988 |
| 17366920 | Mir669a-8     | 2.151083992  | 0.000112988 |
| 17505239 | Nip7          | 1.387521905  | 0.000112988 |
| 17421540 | Nppb          | 1.941646382  | 0.000112988 |
| 17228588 | Ralgps2       | 1.41377102   | 0.000112988 |
| 17220034 | Sccpdh        | 1.439286683  | 0.000112988 |
| 17398323 | Serpini1      | 1.839380163  | 0.000112988 |
| 17374880 | Tyro3         | 1.434790199  | 0.000112988 |
| 17542254 | Xlr4b         | 2.195920032  | 0.000112988 |
| 17200083 |               | -2.204559237 | 0.000112988 |
| 17324486 | Trp63         | 1.644004125  | 0.000113954 |
| 17254047 | Ccl7          | -1.9741016   | 0.00011457  |
| 17499028 | Ing1          | 1.225068604  | 0.00011457  |
| 17366826 | Mir669k       | 1.90648491   | 0.00011457  |
| 17350090 | Sh3rf2        | 1.3200689    | 0.00011457  |
| 17331173 | St3gal6       | 1.60760869   | 0.00011457  |
| 17387407 | Tfpi          | 1.73271482   | 0.00011457  |
| 17273536 | Zfp750        | 2.174665529  | 0.00011457  |
| 17366790 |               | 1.90648491   | 0.00011457  |
| 17522439 | Myl3          | 1.688475388  | 0.000117533 |
| 17535902 | Xlr4d-ps      | 1.454895719  | 0.000117533 |
| 17525503 | Chek1         | 1.349902634  | 0.000121095 |
| 17233347 | Gja1          | 1.085688986  | 0.000122117 |
| 17321966 | Krt5          | 3.259964075  | 0.000122803 |
| 17455496 | n-R5s180      | -1.55355513  | 0.000124138 |
| 17407001 | Efna3         | 1.226234801  | 0.000124661 |
| 17366874 | Mir669k       | 1.910882486  | 0.000124661 |
| 17339223 | Lama1         | 2.273499786  | 0.00012973  |
| 17533959 | LOC101056452  | 1.96444173   | 0.00013487  |
| 17512001 | Gtl3          | 1.523189756  | 0.000139531 |

|          |             |              |             |
|----------|-------------|--------------|-------------|
| 17357560 |             | -1.509487918 | 0.00014182  |
| 17208015 |             | 2.688539683  | 0.000142386 |
| 17519940 | Bckdhb      | 1.620769235  | 0.000146125 |
| 17403895 | Lrrc40      | 1.128640642  | 0.000146125 |
| 17366746 | Mir669k     | 2.217010285  | 0.000146125 |
| 17438113 | Cwh43       | 2.611816665  | 0.00015478  |
| 17529307 | Elovl4      | 2.405836386  | 0.00015478  |
| 17243761 | Fabp3-ps1   | 2.572661244  | 0.00015478  |
| 17449288 | Tmprss11bnl | 1.771340492  | 0.000158276 |
| 17348295 | Thoc1       | 1.810077686  | 0.000164296 |
| 17547571 | Gm12115     | 1.315054628  | 0.000165917 |
| 17391339 | Mall        | 2.600889893  | 0.000165917 |
| 17367852 | Nrarp       | 1.239289546  | 0.000165917 |
| 17316120 | Cdh6        | 1.492507046  | 0.000167792 |
| 17344349 | Dpcr1       | 3.289258199  | 0.000168764 |
| 17413615 | Frmpd1      | 1.6385509    | 0.000168764 |
| 17302429 | Lmo7        | 1.43303358   | 0.000168764 |
| 17245431 | Mir763      | -1.396510145 | 0.000168764 |
| 17378440 | Procr       | 1.576587453  | 0.000168764 |
| 17217136 | Slc45a3     | 2.025593532  | 0.000168764 |
| 17276906 | Smoc1       | 1.288371706  | 0.000168764 |
| 17275830 |             | 1.133991133  | 0.000172113 |
| 17491606 |             | 2.692688024  | 0.000176033 |
| 17396024 | Stmn2       | 1.684442011  | 0.000176996 |
| 17276007 | Tmx1        | 1.19319677   | 0.000185054 |
| 17409668 | Cdc14a      | 1.485740963  | 0.000185914 |
| 17348634 | Rsl24d1     | 1.181196882  | 0.000185914 |
| 17357150 | Wdr74       | 1.627755651  | 0.000185914 |
| 17448607 | Commd8      | 1.416169476  | 0.000186046 |
| 17406165 | Glr3        | 2.060177577  | 0.000186046 |
| 17384994 | Orc4        | 1.139277781  | 0.000187029 |
| 17493842 | Arhgef17    | -1.50211311  | 0.000190199 |
| 17527173 | Elmod1      | 1.735050081  | 0.000192666 |
| 17468594 | Gkn1        | 2.945518762  | 0.000192666 |
| 17508532 | Got111      | 1.501426245  | 0.000192666 |
| 17494950 | Scube2      | 2.194593501  | 0.000192666 |
| 17276642 | Fut8        | 1.793551378  | 0.000193432 |
| 17406129 | Tmem144     | 2.009053278  | 0.000197333 |
| 17366814 |             | 1.705208359  | 0.000203719 |
| 17366850 |             | 1.705208359  | 0.000203719 |
| 17405247 | Exosc8      | 1.814986958  | 0.000208634 |
| 17423479 | Osgin2      | 1.598400304  | 0.000210122 |
| 17509842 | Zfp868      | 1.428394729  | 0.000210122 |

|          |               |              |             |
|----------|---------------|--------------|-------------|
| 17235831 | Gm10778       | 2.062878572  | 0.000218321 |
| 17326081 | C330027C09Rik | 1.306948672  | 0.000221764 |
| 17541760 | Mospd1        | 1.288424279  | 0.000221764 |
| 17228023 | Swf1          | 1.285938769  | 0.000221764 |
| 17366716 |               | 1.649202365  | 0.000221764 |
| 17249206 | Adamts2       | -1.392175541 | 0.000223265 |
| 17293348 | Ctla2b        | -2.032797442 | 0.000223265 |
| 17248231 | Nsg2          | 1.751383779  | 0.000223825 |
| 17509282 | Cdkn2aip      | 1.832091326  | 0.000224967 |
| 17534909 | Ddx26b        | 1.375489542  | 0.000224967 |
| 17499808 | Defb1         | 1.768719104  | 0.000224967 |
| 17409963 | Fnbp1l        | 1.3056544    | 0.000224967 |
| 17364350 | Fra10ac1      | 0.985636251  | 0.000224967 |
| 17491598 | lpw           | 1.932109388  | 0.000224967 |
| 17491604 | lpw           | 1.932109388  | 0.000224967 |
| 17491608 | lpw           | 1.932109388  | 0.000224967 |
| 17491610 | lpw           | 1.932109388  | 0.000224967 |
| 17491612 | lpw           | 1.932109388  | 0.000224967 |
| 17491614 | lpw           | 1.932109388  | 0.000224967 |
| 17491616 | lpw           | 1.932109388  | 0.000224967 |
| 17491618 | lpw           | 1.932109388  | 0.000224967 |
| 17491620 | lpw           | 1.932109388  | 0.000224967 |
| 17491622 | lpw           | 1.932109388  | 0.000224967 |
| 17491624 | lpw           | 1.932109388  | 0.000224967 |
| 17491628 | lpw           | 1.932109388  | 0.000224967 |
| 17491630 | lpw           | 1.932109388  | 0.000224967 |
| 17302397 | Klf5          | 1.65217663   | 0.000224967 |
| 17269391 | Krt14         | 2.278784946  | 0.000224967 |
| 17415979 | Lepr          | 2.398281528  | 0.000224967 |
| 17352549 | Mpp7          | 1.216619832  | 0.000224967 |
| 17244514 | Nudt4         | 1.301187078  | 0.000224967 |
| 17249611 | P4ha2         | 1.638416351  | 0.000224967 |
| 17438423 | Paics         | 1.028087444  | 0.000224967 |
| 17545741 | Pdha1         | 1.122644991  | 0.000224967 |
| 17489908 | Pop4          | 1.325844186  | 0.000224967 |
| 17449033 | Ppat          | 1.474069417  | 0.000224967 |
| 17238210 | Prim1         | 1.548268615  | 0.000224967 |
| 17512755 | Psmc7         | 1.139019988  | 0.000224967 |
| 17411054 | Rpf1          | 0.972551091  | 0.000224967 |
| 17544164 | Rps6ka6       | 1.792430018  | 0.000224967 |
| 17216469 | Serpinb10     | 2.748745092  | 0.000224967 |
| 17355420 | Ska1          | 1.313609987  | 0.000224967 |
| 17491596 | Snord116      | 1.932109388  | 0.000224967 |

|          |               |              |             |
|----------|---------------|--------------|-------------|
| 17491602 | Snord116      | 1.932109388  | 0.000224967 |
| 17293045 | Spock1        | 1.75108671   | 0.000224967 |
| 17414017 | Tmeff1        | 1.156540375  | 0.000224967 |
| 17218707 | Tnfsf18       | 1.63928246   | 0.000224967 |
| 17283940 |               | 1.851284871  | 0.000224967 |
| 17443390 | Upk3bl        | 1.3859711    | 0.000225494 |
| 17404616 | Mrpl47        | 1.018301395  | 0.000225952 |
| 17400998 | Vtcn1         | 1.253864148  | 0.000230624 |
| 17248080 |               | 1.864128735  | 0.000233163 |
| 17520233 | Ctsh          | 1.941736108  | 0.000234432 |
| 17325069 | Heg1          | -1.22746096  | 0.000234432 |
| 17404139 | Snx16         | 1.38502697   | 0.000234432 |
| 17211347 | Tfap2b        | 3.256876365  | 0.000234432 |
| 17542279 | Xlr5b         | 2.498196047  | 0.000234432 |
| 17492078 | Mctp2         | 1.26176973   | 0.000236219 |
| 17284020 | Stk30         | 1.177172372  | 0.000236219 |
| 17501484 | Spock3        | 1.85004623   | 0.000236498 |
| 17403509 | Lpar3         | 2.53319058   | 0.000240232 |
| 17275332 | G2e3          | 1.053169733  | 0.000240939 |
| 17438272 | Kit           | 2.327006827  | 0.000244177 |
| 17304523 | Stab1         | -2.800170206 | 0.000244177 |
| 17239702 | Tbpl1         | 1.128226022  | 0.000244177 |
| 17211243 | Terf1         | 1.207776637  | 0.000244177 |
| 17360109 | Ina           | 2.163677719  | 0.000245269 |
| 17303400 | Pdhb          | 1.200537304  | 0.000247695 |
| 17392255 | Flrt3         | 1.522687784  | 0.00025252  |
| 17335893 | Cryaa         | 2.672008163  | 0.000254375 |
| 17379206 | Mybl2         | 1.962068301  | 0.000254375 |
| 17548190 | Stmn3         | 1.052068982  | 0.000254375 |
| 17365014 | Erlin1        | 1.388140705  | 0.00025722  |
| 17301558 | Kctd9         | 1.052766274  | 0.000258793 |
| 17334904 | Luc7l         | 1.149006793  | 0.000258793 |
| 17436942 |               | 1.784378353  | 0.000258793 |
| 17291534 | Cdkal1        | 1.491604635  | 0.000263979 |
| 17255479 | Gm11534       | 2.316247408  | 0.000263979 |
| 17505069 | Slc7a6        | 1.314246583  | 0.000265942 |
| 17275378 | Coch          | 1.08004837   | 0.000266333 |
| 17305034 | Sncg          | 1.462067955  | 0.000266333 |
| 17407407 | Spr3          | 1.751116753  | 0.000266333 |
| 17288952 | Tmem161b      | 1.589384878  | 0.000266333 |
| 17475216 |               | -1.417126736 | 0.000266333 |
| 17523898 | 9230110C19Rik | 1.821999457  | 0.000267268 |
| 17323198 | Efcab1        | 1.698735128  | 0.000268084 |

|          |               |              |             |
|----------|---------------|--------------|-------------|
| 17222825 | Nabp1         | 1.641015412  | 0.000268084 |
| 17347457 | Atl2          | 0.959033337  | 0.000271877 |
| 17241912 | Ddt           | 1.094727151  | 0.000271877 |
| 17467128 | Nt5c3         | 1.306568318  | 0.000276487 |
| 17551105 |               | -3.247902364 | 0.000276487 |
| 17379871 | 1500012F01Rik | 1.212511345  | 0.000279189 |
| 17292084 | Adtrp         | 1.506156669  | 0.000279189 |
| 17243509 | Nfyb          | 1.465159727  | 0.000279189 |
| 17546745 |               | 2.0333596    | 0.000279189 |
| 17341769 | 1600002H07Rik | 1.612624936  | 0.000279841 |
| 17245923 | Lrp1          | -1.812318166 | 0.000279841 |
| 17266988 | Tada2a        | 1.036978714  | 0.000279841 |
| 17266289 | Cryba1        | 3.556241834  | 0.000280876 |
| 17363470 | Gda           | -1.107610335 | 0.000280876 |
| 17299027 | Gm2959        | -2.130645991 | 0.000280876 |
| 17241355 | Hkdc1         | 2.233460141  | 0.000280876 |
| 17231676 | LOC101056577  | 2.076830596  | 0.000280876 |
| 17224125 | Mreg          | 1.820240312  | 0.000280876 |
| 17286719 | Pak1ip1       | 1.005551469  | 0.000280876 |
| 17471107 | Plekhg6       | 1.241452067  | 0.000280876 |
| 17512657 | Slc7a6os      | 1.043060988  | 0.000280876 |
| 17250775 | Trim16        | 1.499508567  | 0.000280876 |
| 17203245 |               | 2.156493762  | 0.000280876 |
| 17293849 |               | -1.670105492 | 0.000280876 |
| 17241137 | Unc5b         | -1.372012337 | 0.000281716 |
| 17331828 | Cldn8         | 1.793129052  | 0.000284427 |
| 17202163 |               | 2.752955429  | 0.000284427 |
| 17388353 | Gylt1b        | 1.856644011  | 0.00029005  |
| 17230102 | lfi202b       | 1.931299926  | 0.00029005  |
| 17504160 | Polr2c        | 1.021349827  | 0.00029005  |
| 17475342 | Tgfb1         | -1.268420973 | 0.00029005  |
| 17523994 | Cep57         | 1.329774774  | 0.000292531 |
| 17465062 | Fam3c         | 1.118997546  | 0.000292531 |
| 17548311 | Gm19958       | -1.28605215  | 0.000292531 |
| 17548313 | Gm19958       | -1.28605215  | 0.000292531 |
| 17548642 | Gm19958       | -1.28605215  | 0.000292531 |
| 17548644 | Gm19958       | -1.28605215  | 0.000292531 |
| 17279724 | Macc1         | 2.547719689  | 0.000292531 |
| 17374156 | Muc15         | 2.262777362  | 0.000292531 |
| 17315606 | Pde1b         | 2.06336772   | 0.000292531 |
| 17446424 | Xrcc2         | 1.49191847   | 0.000292531 |
| 17238097 | Tmem194       | 1.78506191   | 0.000293305 |
| 17416748 | Txndc12       | 1.359788314  | 0.000296434 |

|          |               |              |             |
|----------|---------------|--------------|-------------|
| 17508787 | Lonrf1        | 1.165723529  | 0.000298227 |
| 17274775 | Lamb1         | 1.103122097  | 0.000299442 |
| 17425160 | Erp44         | 0.882224752  | 0.000301814 |
| 17366800 | Mir669g       | 1.977887093  | 0.000301814 |
| 17366836 | Mir669g       | 1.977887093  | 0.000301814 |
| 17371485 | Phospho2      | 1.08767769   | 0.000301814 |
| 17347042 | Ndc80         | 1.139148398  | 0.000305579 |
| 17293006 | Neurog1       | 1.833765977  | 0.00030782  |
| 17291972 | Slc35b3       | 1.449760039  | 0.000311418 |
| 17524087 | Ankrd49       | 1.06981284   | 0.000316468 |
| 17423228 | Ints8         | 1.137635543  | 0.000316468 |
| 17275890 | Klhdc1        | 1.192692571  | 0.000316468 |
| 17497076 | Chst15        | 1.798222876  | 0.000317335 |
| 17445996 | Orc5          | 0.95613211   | 0.000317335 |
| 17323110 | 2900011O08Rik | 1.186888997  | 0.000331087 |
| 17363828 | Ermp1         | 0.976435903  | 0.000331087 |
| 17489431 | Fxyd3         | 1.48338274   | 0.000331087 |
| 17371739 | Hat1          | 0.92619302   | 0.000331087 |
| 17366752 | Mir466b-2     | 2.4035146    | 0.000331087 |
| 17366764 | Mir466b-2     | 2.4035146    | 0.000331087 |
| 17425566 | Ptpn3         | 1.623030752  | 0.000331087 |
| 17232119 | Slc2a12       | 1.040620968  | 0.000331087 |
| 17533755 | Slc6a14       | 1.896080311  | 0.000331087 |
| 17512938 | Snord111      | 1.393877109  | 0.000331087 |
| 17305757 | Wdhd1         | 1.409268635  | 0.000331087 |
| 17247458 | Wdr92         | 1.335774932  | 0.000334548 |
| 17249375 | Cdkn2aipnl    | 1.058560971  | 0.000340741 |
| 17281895 | Trmt5         | 0.950014942  | 0.000340741 |
| 17316392 | Hrsp12        | 1.150008932  | 0.000340997 |
| 17249481 |               | 1.493185957  | 0.000342674 |
| 17495005 | Tmem41b       | 0.99694015   | 0.000344995 |
| 17377459 |               | 1.124333187  | 0.000351976 |
| 17449596 | Rchy1         | 1.251625744  | 0.000353839 |
| 17519952 |               | -1.095425769 | 0.000353839 |
| 17416750 |               | 1.267408195  | 0.000353839 |
| 17449634 |               | 1.082705374  | 0.000354101 |
| 17510422 | B3gnt3        | 1.901395573  | 0.000359032 |
| 17532268 | Cx3cr1        | -1.61988593  | 0.000359032 |
| 17221093 | Gm6104        | 1.417742228  | 0.000359032 |
| 17286621 | Riok1         | 1.167205782  | 0.000359032 |
| 17507559 | Grtp1         | 1.158531136  | 0.000361431 |
| 17391332 | Mal           | 3.207488476  | 0.000361556 |
| 17481960 | Arntl         | 2.217336435  | 0.000361883 |



|          |           |              |             |
|----------|-----------|--------------|-------------|
| 17225169 | Snora75   | 2.478374937  | 0.000362919 |
| 17353232 | Syt4      | 2.192997787  | 0.000363767 |
| 17219308 | Pvrl4     | 1.299126026  | 0.000365403 |
| 17538390 | Gm15070   | 1.924181728  | 0.000367744 |
| 17422704 | Ccnl2     | 1.063404941  | 0.000369415 |
| 17505762 | Zfp1      | 1.347723367  | 0.000370236 |
| 17546234 | Vamp7     | 1.219462099  | 0.000381869 |
| 17267155 | Appbp2    | 1.144635787  | 0.000382761 |
| 17299454 | Ap5m1     | 1.202376703  | 0.000388211 |
| 17246310 | Dgka      | 1.190570869  | 0.000388211 |
| 17326636 |           | -1.103011699 | 0.000388211 |
| 17449301 | Tmprss11e | 2.256260152  | 0.000389502 |
| 17370598 | Acvr2a    | 1.430572548  | 0.000390965 |
| 17356622 | Cdca5     | 1.542025183  | 0.000390965 |
| 17506353 | Gm22      | -1.80391765  | 0.000390965 |
| 17257361 | Mrc2      | -1.236490248 | 0.000390965 |
| 17402681 | Papss1    | 1.108767648  | 0.000390965 |
| 17416751 |           | 1.323181666  | 0.000390965 |
| 17222072 | Ccdc115   | 1.660637536  | 0.000391879 |
| 17420171 | Hspg2     | -1.208602605 | 0.000391879 |
| 17350563 | Srfbp1    | 1.06092012   | 0.000391879 |
| 17438134 | Dcun1d4   | 1.019996594  | 0.000392328 |
| 17210393 |           | 2.110244863  | 0.000399251 |
| 17261878 | Gabrg2    | 1.784430906  | 0.000402161 |
| 17463781 | Emp1      | 1.357727046  | 0.000403735 |
| 17298775 | Anxa8     | 1.522553724  | 0.000405459 |
| 17354804 | Grpel2    | 1.064659085  | 0.000405459 |
| 17539004 | Klf8      | 1.559553698  | 0.000405459 |
| 17366810 | Mir669a-8 | 2.173640889  | 0.000405459 |
| 17366846 | Mir669a-8 | 2.173640889  | 0.000405459 |
| 17501025 | Mlf1ip    | 1.110833102  | 0.000405459 |
| 17203425 |           | 2.482715356  | 0.000405459 |
| 17416760 |           | 1.147112328  | 0.000405459 |
| 17365165 |           | 0.966889402  | 0.000405459 |
| 17280842 | lfrd1     | 1.245138784  | 0.000408551 |
| 17352933 | Dsc2      | 1.850424956  | 0.000410969 |
| 17487489 | Pvr       | 1.358948131  | 0.000410969 |
| 17551067 |           | -2.824718703 | 0.000410969 |
| 17497525 | Adam8     | -1.820024746 | 0.000411115 |
| 17310339 | C1qtnf3   | 1.817898301  | 0.000411115 |
| 17484454 | Utf1      | -1.925255355 | 0.000411115 |
| 17346664 |           | -1.008142981 | 0.000413978 |
| 17491193 | Saa3      | -4.068390594 | 0.000416053 |

|          |                |              |             |
|----------|----------------|--------------|-------------|
| 17255058 | Tmem100        | 1.370746587  | 0.000419621 |
| 17399012 | Cct3           | 0.998737559  | 0.000423686 |
| 17398287 | Nmd3           | 1.036069531  | 0.000423686 |
| 17329079 | Parl           | 1.011796389  | 0.000423686 |
| 17551071 |                | -3.479349922 | 0.000423686 |
| 17486308 | 2810047C21Rik1 | 1.549586138  | 0.000423787 |
| 17486384 | 2810047C21Rik1 | 1.549586138  | 0.000423787 |
| 17268243 | B4galnt2       | 2.797501638  | 0.000423787 |
| 17259585 | Narf           | 1.733335461  | 0.000423787 |
| 17550494 | Gm11974        | 1.541750303  | 0.000426755 |
| 17413500 | Glipr2         | 1.429009147  | 0.000427709 |
| 17537271 | Zfp711         | 1.586419941  | 0.000427709 |
| 17340449 | Tfb1m          | 0.873110999  | 0.00043195  |
| 17504350 | Setd6          | 1.174472918  | 0.000432943 |
| 17337741 | Tnfrsf21       | 1.287482702  | 0.000432943 |
| 17295944 | Ppwd1          | 1.156194922  | 0.000433648 |
| 17300396 | Ngdn           | 1.217993002  | 0.000434983 |
| 17509697 | Tma16          | 0.993049611  | 0.000434983 |
| 17503616 | Adcy7          | -1.145792596 | 0.000435138 |
| 17381752 | Fam188a        | 0.952412583  | 0.000435138 |
| 17222001 | Prim2          | 1.248518958  | 0.000439165 |
| 17351414 | Pmaip1         | 0.888965948  | 0.000439401 |
| 17329759 | Apod           | 1.461876561  | 0.000442594 |
| 17546160 | Msl3           | 1.506671093  | 0.000442782 |
| 17551065 |                | -3.220302773 | 0.000445865 |
| 17466659 | Tra2a          | 1.326057599  | 0.000447418 |
| 17397268 | Plk4           | 1.071428524  | 0.000454718 |
| 17366012 | 4930506M07Rik  | 1.685668582  | 0.000461066 |
| 17395302 | Gm14402        | 2.269928081  | 0.000461066 |
| 17437887 | Limch1         | 1.094679817  | 0.000461066 |
| 17422988 | Rps20          | 1.315546363  | 0.000465114 |
| 17511540 | Sall1          | 1.983056654  | 0.000465114 |
| 17359411 | Zfp518a        | 1.007922661  | 0.000468411 |
| 17346412 | Gtf2f1         | 1.134185181  | 0.000469183 |
| 17444940 | Uspl1          | 1.260995929  | 0.000469183 |
| 17447831 | Fgfbp1         | 2.030004288  | 0.00047404  |
| 17337063 |                | 1.232211448  | 0.00047404  |
| 17550847 |                | -3.168700414 | 0.000477597 |
| 17507288 | Shcbp1         | 2.032575419  | 0.000490014 |
| 17464146 | Cmas           | 0.942361638  | 0.00049229  |
| 17507584 | Dcun1d2        | 1.103409458  | 0.00049229  |
| 17309981 | Fyb            | -1.89447342  | 0.00049229  |
| 17421571 | Mad2l2         | 0.964238392  | 0.00049229  |

|          |           |              |             |
|----------|-----------|--------------|-------------|
| 17507490 | Tubgcp3   | 1.304434837  | 0.00049229  |
| 17436328 | Yes1      | 1.000284564  | 0.00049229  |
| 17551063 |           | -3.166012244 | 0.00049229  |
| 17524703 | Ap1m2     | 1.322166043  | 0.000492811 |
| 17216339 | Tnfrsf11a | -1.073946442 | 0.000494299 |
| 17360599 | Adrb1     | 1.140825746  | 0.000494415 |
| 17540402 | Efhc2     | 1.736467859  | 0.000494415 |
| 17421588 | Fbxo2     | 1.333798382  | 0.000494415 |
| 17510823 | Gab1      | 0.906336142  | 0.000494415 |
| 17348791 | Dsg3      | 2.064034432  | 0.000497918 |
| 17358876 | Rpp30     | 0.891370659  | 0.000497918 |
| 17340502 | Serac1    | 1.104217635  | 0.000497918 |
| 17548472 |           | 0.859256745  | 0.000497918 |
| 17530069 | Armc8     | 1.007004466  | 0.000498839 |
| 17390186 | Tmem87a   | 1.11021969   | 0.000498839 |
| 17433931 | B3galt6   | 1.300714583  | 0.000501007 |
| 17365421 | Nt5c2     | 1.452056147  | 0.000501007 |
| 17377651 | Slc52a3   | 0.982084943  | 0.000501007 |
| 17535488 | Xlr5b     | 2.186766884  | 0.000501277 |
| 17330058 | Pdia5     | 1.193991166  | 0.000501782 |
| 17371390 | Nostrin   | 2.187165899  | 0.000507329 |
| 17405985 | Pdcd10    | 0.870363445  | 0.000507329 |
| 17488436 | Plekhg2   | -0.921949602 | 0.000507329 |
| 17408563 | Vangl1    | 1.556062988  | 0.000507329 |
| 17405471 | Gpr87     | 2.167136601  | 0.000511012 |
| 17368760 | Mir3088   | 1.370674016  | 0.000511012 |
| 17362503 | Ttc9c     | 1.094259333  | 0.000511012 |
| 17495305 |           | 1.06316474   | 0.000511012 |
| 17414984 | Lurap1l   | 1.445792582  | 0.000513661 |
| 17227384 | Pkp1      | 1.834584937  | 0.000513661 |
| 17264863 |           | 1.337213307  | 0.000513661 |
| 17300365 |           | 1.547305483  | 0.000513661 |
| 17358486 | Cdc37l1   | 0.934131468  | 0.00051608  |
| 17467302 | Vmn1r36   | -2.232198484 | 0.000518616 |
| 17545225 |           | 1.428680117  | 0.00051932  |
| 17513713 | Piezo1    | -1.188131254 | 0.000528476 |
| 17539586 | Fancb     | 1.124589965  | 0.000532355 |
| 17241409 | Srgn      | 2.125713011  | 0.000532355 |
| 17469341 | Uba3      | 0.969937201  | 0.000532482 |
| 17450180 | Fam175a   | 1.175443923  | 0.000533491 |
| 17438969 | Pf4       | -2.26472321  | 0.000533491 |
| 17276352 | Snapc1    | 0.962800095  | 0.000533491 |
| 17230256 | Adss      | 0.816614555  | 0.000546879 |

|          |               |              |             |
|----------|---------------|--------------|-------------|
| 17404259 | Armc1         | 1.115356531  | 0.000546879 |
| 17508779 | Cldn23        | 1.467223266  | 0.000546879 |
| 17432387 | Tmem51        | 1.453041644  | 0.000546879 |
| 17267745 | Tom11l        | 1.177471782  | 0.000546879 |
| 17365617 | Wdr96         | -0.858236493 | 0.000546879 |
| 17204595 |               | 1.676982564  | 0.000546879 |
| 17378905 | Arhgap40      | 1.318808284  | 0.000548119 |
| 17319022 | C1qtnf6       | -1.050107494 | 0.000548572 |
| 17513176 | Tmem170       | 1.095752891  | 0.000549823 |
| 17295649 | Gtf2h2        | 0.893519552  | 0.000549887 |
| 17359212 | Hells         | 1.18008755   | 0.000549887 |
| 17308888 | Naa16         | 1.116463502  | 0.000549887 |
| 17243850 | Parpbp        | 1.383801722  | 0.000549887 |
| 17237035 | Slc6a15       | 1.462454324  | 0.000549887 |
| 17401072 | Tspan2        | 1.259410703  | 0.000549887 |
| 17449636 |               | 1.274129313  | 0.000549887 |
| 17551127 |               | -4.232462688 | 0.000549887 |
| 17279162 |               | 1.158794901  | 0.000549887 |
| 17465246 | Pot1a         | 1.294645596  | 0.00055287  |
| 17241377 | Supv3l1       | 0.988272399  | 0.00055287  |
| 17324305 | Dnajb11       | 1.271418854  | 0.000554547 |
| 17226752 | Dyrk3         | 1.203867992  | 0.000554547 |
| 17222650 | Uxs1          | 1.122081754  | 0.000557299 |
| 17275351 | Scfd1         | 0.903608504  | 0.000558513 |
| 17478942 | Tm2d3         | 1.004366066  | 0.000558513 |
| 17310673 | Ank           | 1.29905006   | 0.000561673 |
| 17458813 | Aqp1          | 1.221190122  | 0.000562867 |
| 17287081 | Id4           | 1.300538668  | 0.000563439 |
| 17355316 | Poli          | 1.11519793   | 0.0005645   |
| 17373776 | Gm13875       | -1.064395331 | 0.000564882 |
| 17527769 | Bbs4          | 1.449971397  | 0.000571966 |
| 17476959 | 2610021A01Rik | 1.083912737  | 0.000573542 |
| 17315960 | Brix1         | 0.940507284  | 0.000582461 |
| 17261122 | Papolg        | 1.177015664  | 0.000582461 |
| 17422138 | Gpr153        | -0.986995709 | 0.000582758 |
| 17274513 | Grhl1         | 1.314497234  | 0.000582758 |
| 17528125 | Smad6         | -1.129672111 | 0.000585121 |
| 17321241 | Snora34       | 0.936383269  | 0.000591414 |
| 17457804 | Tcrb-J        | -1.228436645 | 0.000592031 |
| 17269347 | Krt13         | 1.795149113  | 0.000592334 |
| 17349764 | Wdr55         | 1.575082079  | 0.000594349 |
| 17508423 | Ash2l         | 0.895633738  | 0.000595093 |
| 17387305 | Frzb          | 1.936236507  | 0.000595093 |

|          |               |              |             |
|----------|---------------|--------------|-------------|
| 17360331 | Mxi1          | 1.102208515  | 0.000599537 |
| 17324623 | Hes1          | 0.897333373  | 0.000600871 |
| 17449639 |               | 1.546056562  | 0.000603286 |
| 17510749 | Abce1         | 0.867761546  | 0.000604492 |
| 17285488 | Amph          | 0.975502914  | 0.000604492 |
| 17442942 | Snora15       | 2.136214693  | 0.000604492 |
| 17376270 | Snord110      | 1.755379926  | 0.000604492 |
| 17357223 |               | 1.105866578  | 0.000604492 |
| 17394003 |               | 1.437295146  | 0.000604492 |
| 17326510 | Pros1         | 1.036341466  | 0.000604695 |
| 17310044 | Lifr          | 1.231502545  | 0.000607395 |
| 17368569 | Col5a1        | -1.222706833 | 0.000612909 |
| 17227266 | Elf3          | 1.679213182  | 0.000614316 |
| 17517500 | Fbxo22        | 1.131790434  | 0.000616451 |
| 17290033 | Arl15         | 0.918047635  | 0.000619166 |
| 17414456 | Hsd12         | 0.858366945  | 0.000619166 |
| 17324394 | Snord2        | 1.498352325  | 0.000619166 |
| 17551117 |               | -3.17531611  | 0.000619166 |
| 17289329 | Fam169a       | 2.249873907  | 0.00062292  |
| 17509676 | Gm10664       | 1.250280853  | 0.00062292  |
| 17277195 | Ptgr2         | 1.254225824  | 0.000626447 |
| 17275689 | Gemin2        | 1.01373162   | 0.000626832 |
| 17281193 | Gm2446        | 1.116654625  | 0.000626832 |
| 17412123 | Ccnc          | 1.023124526  | 0.000629941 |
| 17366788 | Mir669g       | 1.639490574  | 0.000633275 |
| 17366824 | Mir669g       | 1.639490574  | 0.000633275 |
| 17534938 | Slc9a6        | 1.902123043  | 0.000633275 |
| 17502462 | Tmem38a       | 0.884478113  | 0.000633275 |
| 17212935 | 9430016H08Rik | 0.948826832  | 0.00063493  |
| 17542588 | Flna          | -1.174436612 | 0.00063493  |
| 17358020 | Nmrk1         | 1.347754821  | 0.00063493  |
| 17397344 | Phf17         | 1.300182784  | 0.00063493  |
| 17438496 | Polr2b        | 0.882551608  | 0.00063493  |
| 17468532 | Gmcl1         | 0.896491187  | 0.000636442 |
| 17551125 |               | -2.853963679 | 0.000636442 |
| 17245272 | Nup107        | 1.320710017  | 0.000640052 |
| 17278709 | Mir434        | 1.692516324  | 0.000641669 |
| 17424554 | Stoml2        | 1.081440486  | 0.000641669 |
| 17381200 | Rpp38         | 0.909974898  | 0.000641948 |
| 17248069 |               | 1.122205897  | 0.000641948 |
| 17461486 |               | 2.81790866   | 0.000641948 |
| 17376252 | Nop56         | 1.022120545  | 0.000652568 |
| 17416755 |               | 1.882290509  | 0.000652568 |

|          |               |              |             |
|----------|---------------|--------------|-------------|
| 17386569 | Chn1          | 1.021780651  | 0.000653037 |
| 17514359 | Alkbh8        | 1.033871135  | 0.000656511 |
| 17456627 | Finc          | -1.089912794 | 0.000657094 |
| 17357225 |               | 1.201189231  | 0.000659205 |
| 17299089 | Gm8113        | -0.884565233 | 0.000667153 |
| 17364090 | Ankrd22       | 2.077487077  | 0.000669313 |
| 17233273 | Dcbld1        | 1.693295587  | 0.000669313 |
| 17439563 | Enoph1        | 1.120764891  | 0.000669313 |
| 17289324 | Gcnt4         | 2.145909558  | 0.000669313 |
| 17366860 |               | 2.09133355   | 0.000669313 |
| 17221241 |               | 0.929704259  | 0.000670927 |
| 17391888 | Rnf24         | 1.74161033   | 0.000673904 |
| 17354282 | Cdo1          | 1.602115857  | 0.000675993 |
| 17331987 | Mis18a        | 1.403594832  | 0.00067744  |
| 17232162 | Vnn1          | 1.73166731   | 0.00067744  |
| 17255762 | Mrpl45        | 1.036514156  | 0.000679395 |
| 17289794 | Plk2          | 0.934056238  | 0.000685124 |
| 17223313 | Tyw5          | 1.078160016  | 0.000685124 |
| 17534064 | Zcchc12       | 1.172624559  | 0.000685124 |
| 17528137 | Zwilch        | 1.414764777  | 0.000685124 |
| 17551075 |               | -2.715478612 | 0.000685124 |
| 17423030 | Sdr39u1       | 1.729642574  | 0.000686506 |
| 17333567 | Tbp           | 0.877148792  | 0.00069215  |
| 17355512 | 8030462N17Rik | 1.362396347  | 0.000693834 |
| 17495297 | Psma1         | 0.833212107  | 0.000694655 |
| 17221497 | Tceb1         | 1.111245224  | 0.000694655 |
| 17424674 | Tln1          | -1.165753319 | 0.000694655 |
| 17475217 |               | -0.964693492 | 0.000694655 |
| 17482307 | Ppp1cc        | 0.822158178  | 0.00069486  |
| 17265384 | Gm12318       | -1.007063543 | 0.00069521  |
| 17378628 | Aar2          | 1.17276956   | 0.000703045 |
| 17499962 | Plat          | 1.151005648  | 0.000703045 |
| 17278470 | Vrk1          | 1.349219881  | 0.000708901 |
| 17407010 | Efna4         | 1.239310112  | 0.00070896  |
| 17244591 | 4930430F08Rik | 1.122796511  | 0.000714082 |
| 17266797 | Rffl          | 1.25836172   | 0.000717493 |
| 17276926 |               | 1.857927911  | 0.000719856 |
| 17203699 |               | -2.665098115 | 0.000719856 |
| 17398406 | Fam198b       | 0.855178373  | 0.00072228  |
| 17508868 | Cnot7         | 0.850935373  | 0.000725713 |
| 17359156 | Slc35g1       | 1.666858617  | 0.000725713 |
| 17254916 | Srsf1         | 1.091990374  | 0.000725713 |
| 17289568 | Trim23        | 1.097473868  | 0.000725713 |

|          |          |              |             |
|----------|----------|--------------|-------------|
| 17533312 |          | -2.883465224 | 0.000725713 |
| 17256225 | Cdc6     | 1.721511738  | 0.000726967 |
| 17231349 | Ppp1r14c | 1.23680107   | 0.000726967 |
| 17376626 | Mcm8     | 0.993924583  | 0.000727088 |
| 17205293 |          | -1.190216728 | 0.000727088 |
| 17209483 |          | -1.190216728 | 0.000727088 |
| 17232634 | Tube1    | 0.979407623  | 0.000731003 |
| 17396287 | Hlff     | 1.014328753  | 0.000732794 |
| 17407749 | Bnpl     | 0.953986469  | 0.000735035 |
| 17351053 | Csf1r    | -1.417746338 | 0.000735035 |
| 17396978 | Exosc9   | 0.898265154  | 0.000735035 |
| 17231248 | G0s2     | -0.935885511 | 0.000735035 |
| 17478496 | Luzp2    | 1.333411133  | 0.000735035 |
| 17230499 | Nvl      | 1.103004212  | 0.000735035 |
| 17239755 | Rps12    | 0.994629353  | 0.000735035 |
| 17426517 | Tle1     | 0.879018246  | 0.000735035 |
| 17416757 |          | 2.007136419  | 0.000735035 |
| 17323067 |          | 0.972440899  | 0.000735035 |
| 17228743 | Cacybp   | 0.845998428  | 0.000735937 |
| 17231534 | Nup43    | 0.957645141  | 0.000736595 |
| 17239360 | Plagl1   | -2.113247373 | 0.000736595 |
| 17357741 | Mrpl16   | 0.982104323  | 0.000737223 |
| 17306054 | Osgep    | 1.095449791  | 0.000737223 |
| 17449637 |          | 1.316244044  | 0.000737223 |
| 17386540 | Wipf1    | -0.859072068 | 0.000738599 |
| 17254041 | Ccl2     | -2.211322815 | 0.00074215  |
| 17278104 | Tmem251  | 1.127111523  | 0.00074215  |
| 17274496 | Taf1b    | 0.846833318  | 0.000745789 |
| 17504649 | Cbfb     | 0.948606332  | 0.000746882 |
| 17281506 | Pole2    | 1.084143333  | 0.000746882 |
| 17481556 | Ppfibp2  | 1.120026876  | 0.000746882 |
| 17333672 | Riok2    | 0.968080599  | 0.000746882 |
| 17475221 |          | -1.167096803 | 0.000746882 |
| 17295346 | Utp15    | 1.262065659  | 0.000748035 |
| 17537019 | Pbdc1    | 0.955659354  | 0.000751371 |
| 17314738 | Spats2   | 1.583858764  | 0.00075169  |
| 17247852 | Bcl11a   | 1.679399017  | 0.000752347 |
| 17435528 | Dpp6     | 1.170290174  | 0.000752347 |
| 17529793 | Atp1b3   | 0.834502372  | 0.000753488 |
| 17366728 | Mir669d  | 1.47890978   | 0.000753488 |
| 17297637 |          | -1.114994482 | 0.000753488 |
| 17512628 | Dpep2    | 2.326344513  | 0.000759527 |
| 17218168 | Trmt1l   | 0.948269092  | 0.000759527 |

|          |               |              |             |
|----------|---------------|--------------|-------------|
| 17457171 | Bpgm          | 1.141804126  | 0.000760052 |
| 17549588 | Bgn           | -1.428178359 | 0.000763871 |
| 17549860 | Bgn           | -1.428178359 | 0.000763871 |
| 17285654 | 4930470G03Rik | 1.611559831  | 0.000764936 |
| 17455944 | Acn9          | 0.750790072  | 0.000764936 |
| 17512634 | Esrp2         | 1.067131476  | 0.000764936 |
| 17435584 | Insig1        | 1.297940583  | 0.000764936 |
| 17206091 |               | -3.029781734 | 0.000764936 |
| 17227297 | Timm17a       | 0.894933856  | 0.000767643 |
| 17388196 | Ddb2          | 0.901840278  | 0.000772104 |
| 17501504 |               | -1.580929534 | 0.000778305 |
| 17329809 | Pigx          | 0.96204975   | 0.000778686 |
| 17490551 | Prr12         | -0.939909469 | 0.000778686 |
| 17310304 | Rad1          | 0.811587701  | 0.000778686 |
| 17226486 | 2900009J06Rik | -1.170481259 | 0.000779123 |
| 17363086 | Dtx4          | -0.925714252 | 0.000779123 |
| 17546001 | Gira2         | 1.575948334  | 0.000779123 |
| 17274346 | 5730507C01Rik | 1.024254223  | 0.0007829   |
| 17362511 | Gng3          | 0.888557634  | 0.0007829   |
| 17222332 | Mgat4a        | 1.214885792  | 0.0007829   |
| 17274202 | Ntsr2         | 0.964094324  | 0.0007829   |
| 17316831 | Nudcd1        | 0.854459234  | 0.0007829   |
| 17331021 | Pcnp          | 0.8381833    | 0.0007829   |
| 17442032 | Ppp1cc        | 1.077503693  | 0.0007829   |
| 17351497 | Seh1l         | 0.891736883  | 0.0007829   |
| 17529549 | Snhg5         | 0.941267895  | 0.0007829   |
| 17238850 |               | -0.983720643 | 0.000783646 |
| 17467359 | Tacstd2       | 1.84323861   | 0.000787781 |
| 17317313 | Tatdn1        | 0.949653182  | 0.000787781 |
| 17303453 | 4930452B06Rik | 0.997524296  | 0.000788672 |
| 17249282 | Clk4          | 1.083169847  | 0.000788672 |
| 17311191 | Cthrc1        | -0.96170997  | 0.000788672 |
| 17401144 | Dennd2c       | 1.305310963  | 0.000788672 |
| 17449627 | G3bp2         | 0.983499716  | 0.000788672 |
| 17325592 | Popdc2        | -1.508863014 | 0.000788672 |
| 17458074 | Cul1          | 0.930749269  | 0.000790172 |
| 17253422 | Dhrs13        | 1.22493965   | 0.000790172 |
| 17232215 | Moxd1         | 0.987554722  | 0.000790172 |
| 17301108 | Arl11         | -1.101209529 | 0.000795715 |
| 17470394 | B4galnt3      | 1.5550475    | 0.000795715 |
| 17364565 | Blnk          | -1.159900525 | 0.000795715 |
| 17279858 | Fkbp1b        | 1.476171296  | 0.000795715 |
| 17351485 | LOC101056547  | 0.837310329  | 0.000795715 |



|          |              |              |             |
|----------|--------------|--------------|-------------|
| 17370745 | Rif1         | 0.849091385  | 0.000795715 |
| 17305986 | Rpph1        | -2.105756276 | 0.000795715 |
| 17423674 | Ufl1         | 1.095189704  | 0.000795715 |
| 17343559 | Zfp81        | 1.388913752  | 0.000795715 |
| 17319753 | Gm17206      | -0.963208614 | 0.000795788 |
| 17261098 | LOC101056392 | 0.819068925  | 0.000795788 |
| 17519022 | Myo1e        | 0.971190126  | 0.000795788 |
| 17295770 | Slc30a5      | 0.862615609  | 0.000795788 |
| 17357556 |              | -1.076565146 | 0.000796017 |
| 17518318 |              | 2.201298272  | 0.000799115 |
| 17220844 | Nek2         | 1.246256027  | 0.000799472 |
| 17384813 | Ppp6c        | 0.856861265  | 0.000799472 |
| 17310637 | Fam134b      | 1.370769549  | 0.000800544 |
| 17353796 | Taf7         | 1.204112825  | 0.000812592 |
| 17339476 | Wdr43        | 0.976075248  | 0.000812592 |
| 17294664 | Polr3g       | 1.033057436  | 0.000815951 |
| 17324762 | Rnf168       | 1.011463294  | 0.000815951 |
| 17467799 | Tgoln1       | 0.946967098  | 0.000815951 |
| 17290949 | Zscan26      | 1.375721793  | 0.000815951 |
| 17219848 | Exo1         | 1.076081048  | 0.000818526 |
| 17339604 | Slc30a6      | 1.478645113  | 0.000818526 |
| 17407578 | Tuft1        | 1.17017144   | 0.000818526 |
| 17414434 | Ugcg         | 1.067087268  | 0.000818526 |
| 17551109 |              | -3.06654592  | 0.000818526 |
| 17548946 | H3f3b        | 0.744066099  | 0.000822339 |
| 17213317 |              | -1.280746686 | 0.000822339 |
| 17352241 | Fbxo15       | 2.165811391  | 0.000827558 |
| 17212406 | Bivm         | 0.979011099  | 0.00082839  |
| 17484040 | Bub3         | 0.915583099  | 0.000830985 |
| 17408829 | Ddx20        | 1.088720653  | 0.000830985 |
| 17283939 |              | 1.750491937  | 0.000831988 |
| 17338434 | Oard1        | 1.300678586  | 0.000833066 |
| 17424298 | Dctn3        | 0.858553937  | 0.000835839 |
| 17528775 | Gm5918       | 0.836341334  | 0.000835839 |
| 17374098 | Lgr4         | 1.492155693  | 0.000835839 |
| 17538590 | Pfkfb1       | 0.987772489  | 0.000835839 |
| 17544220 | Pof1b        | 1.871944537  | 0.000835839 |
| 17419277 | Sdc3         | -1.06109848  | 0.000835839 |
| 17304510 | Snord69      | 1.804017613  | 0.000835839 |
| 17257157 | Wnt3         | 1.500660799  | 0.000835839 |
| 17551101 |              | -3.316269509 | 0.000835839 |
| 17209145 |              | -2.153808492 | 0.000835839 |
| 17229433 | Nuf2         | 0.945026897  | 0.000842804 |

|          |               |              |             |
|----------|---------------|--------------|-------------|
| 17488806 | Spint2        | 0.927278466  | 0.000844284 |
| 17300153 | Traj50        | 0.786338775  | 0.000845838 |
| 17247377 | Vstm2a        | 1.320768558  | 0.000845838 |
| 17409893 | Slc44a3       | 1.707831446  | 0.000846114 |
| 17203959 |               | 1.496739175  | 0.000846114 |
| 17223117 | Gtf3c3        | 0.803156966  | 0.000849132 |
| 17397604 | Supt20        | 0.931332022  | 0.000849143 |
| 17551073 |               | -3.044273801 | 0.000850619 |
| 17346975 | Emilin2       | -1.095330798 | 0.000851048 |
| 17278886 | Mir409        | -1.087660547 | 0.000851048 |
| 17401741 | Taf13         | 0.847377591  | 0.000851048 |
| 17348467 | 3110002H16Rik | 1.445716972  | 0.000851337 |
| 17287330 | Cks2          | 0.939588424  | 0.000851337 |
| 17363025 | Stx3          | 1.630202332  | 0.000851337 |
| 17302849 | Tm9sf2        | 0.784494058  | 0.000851337 |
| 17505309 | Mir140        | -1.022248956 | 0.000851435 |
| 17551133 |               | -3.33591429  | 0.000851435 |
| 17279404 | Pld4          | -2.023107353 | 0.000851982 |
| 17444802 | LOC100505283  | 1.936588138  | 0.000857685 |
| 17329167 | Clcn2         | 1.292061435  | 0.00086258  |
| 17516087 | Vsig2         | 1.040105406  | 0.00086258  |
| 17236500 |               | -1.085215786 | 0.000870394 |
| 17243576 | Appl2         | 0.945008357  | 0.000872676 |
| 17287160 | Aspn          | 2.353763333  | 0.000872676 |
| 17223616 | Raph1         | -0.916093056 | 0.000872676 |
| 17352439 | Arhgap12      | 0.900532561  | 0.000880016 |
| 17385967 | Galnt3        | 1.494966082  | 0.000880016 |
| 17231844 | Perp          | 0.968506659  | 0.000880016 |
| 17228164 | Lamc1         | 0.810332054  | 0.000881394 |
| 17245264 | Slc35e3       | 1.012126597  | 0.000881394 |
| 17484852 | Eps8l2        | 1.159874653  | 0.000885111 |
| 17374332 | Fmn1          | -0.969867711 | 0.000885111 |
| 17514257 | Rbm34         | 1.253657002  | 0.000890384 |
| 17240027 | Trmt11        | 0.804181001  | 0.000892342 |
| 17395777 | Ptk6          | 1.948197339  | 0.000892851 |
| 17402181 | F3            | 1.516806454  | 0.00089321  |
| 17548620 | Gm15118       | 0.865786341  | 0.00089321  |
| 17290999 | Hist1h2bn     | -0.785678178 | 0.0008938   |
| 17354831 | Ablim3        | 1.172478362  | 0.000895177 |
| 17278765 | AF357426      | 0.942117075  | 0.000895177 |
| 17378596 | Cnbd2         | -0.933231571 | 0.000895177 |
| 17260786 | Etaa1         | 0.938220828  | 0.000895177 |
| 17235826 | Gm10777       | 0.916097974  | 0.000895177 |

|          |               |              |             |
|----------|---------------|--------------|-------------|
| 17393541 | Gm14173       | -0.83880404  | 0.000895177 |
| 17458439 | Gpmb          | -1.650680847 | 0.000895177 |
| 17527666 | Islr2         | 1.089079407  | 0.000895177 |
| 17246860 | Nipsnap1      | 1.064921293  | 0.000895177 |
| 17337276 | Ppp1r18       | -1.142688162 | 0.000895177 |
| 17541612 | Rap2c         | 0.966814723  | 0.000895177 |
| 17549354 | Stx7          | 1.571347995  | 0.000895177 |
| 17549736 | Stx7          | 1.571347995  | 0.000895177 |
| 17300079 | Trav13-4-dv7  | -1.410068586 | 0.000895177 |
| 17418128 | Trit1         | 1.256037157  | 0.000895177 |
| 17475225 |               | -0.916064377 | 0.000895177 |
| 17544919 | Nup62cl       | 1.666822894  | 0.000900867 |
| 17381404 | Sec61a2       | 1.224807413  | 0.000900876 |
| 17347493 | Srsf7         | 0.869430044  | 0.000903928 |
| 17416759 |               | 1.160010929  | 0.000903928 |
| 17319453 | Slc25a17      | 0.876344078  | 0.000907673 |
| 17361041 | Aldh3b1       | -0.860627368 | 0.000909948 |
| 17311602 | Mtbp          | 1.262025125  | 0.000912837 |
| 17354585 |               | -1.029693573 | 0.000914569 |
| 17349993 | Rnf14         | 1.000098327  | 0.000917396 |
| 17431478 | Grhl3         | 2.05912738   | 0.000924557 |
| 17547795 |               | 1.012603714  | 0.000927716 |
| 17256537 | Mlx           | 0.906572275  | 0.00093072  |
| 17260742 |               | -2.726146169 | 0.00093072  |
| 17495466 | Arl6ip1       | 0.773094034  | 0.000931125 |
| 17528963 | Lrrc1         | 1.824046075  | 0.000931125 |
| 17443883 | Zfp157        | 1.231700189  | 0.000931125 |
| 17491636 | D7Erttd715e   | 1.399328703  | 0.000935714 |
| 17499011 | E230013L22Rik | -0.864746246 | 0.000937852 |
| 17480292 | Nars2         | 0.901474425  | 0.00093841  |
| 17357220 |               | 2.085573521  | 0.000940915 |
| 17389920 | Oip5          | 1.449413275  | 0.000948343 |
| 17354463 | March3        | 1.196435471  | 0.00094956  |
| 17541440 | Zfp280c       | 0.893052023  | 0.00094956  |
| 17542034 | Cdr1          | 1.93851104   | 0.000953581 |
| 17296537 | Zfp131        | 0.918333706  | 0.000954659 |
| 17284469 |               | -1.205460433 | 0.000961266 |
| 17478362 | Prmt3         | 0.794224167  | 0.000962772 |
| 17276819 | Exd2          | 0.829345308  | 0.000963843 |
| 17289344 | Gfm2          | 1.008232818  | 0.000963843 |
| 17288387 | Nsun2         | 0.867371102  | 0.000963843 |
| 17261575 | Ranbp17       | 1.076333883  | 0.000964679 |
| 17548532 | Col1a2        | -1.799362576 | 0.000965163 |

|          |                |              |             |
|----------|----------------|--------------|-------------|
| 17289660 | Dimt1          | 0.82993017   | 0.000965163 |
| 17364762 | Exosc1         | 1.039102919  | 0.000965163 |
| 17296142 | Gbp1           | 0.769951936  | 0.000965163 |
| 17343483 | Zfp870         | 0.992988186  | 0.000965163 |
| 17490695 | Dkk1           | 1.47389545   | 0.000966906 |
| 17210639 |                | -2.162977321 | 0.000966906 |
| 17514087 | 2310022B05Rik  | -0.89651857  | 0.000967497 |
| 17410239 | 5730508B09Rik  | 0.835539031  | 0.000967497 |
| 17451334 | Crybb3         | 1.675391288  | 0.000967497 |
| 17257100 | Fmn1           | -0.857053156 | 0.000967497 |
| 17550693 |                | -2.51474518  | 0.000967497 |
| 17366884 |                | 1.749076195  | 0.000967497 |
| 17249362 | Sar1b          | 0.830228626  | 0.000971835 |
| 17528924 | Fam83b         | 1.66464743   | 0.000972088 |
| 17211498 | Lmbrd1         | 0.729266201  | 0.000972088 |
| 17438246 | Pdgfra         | 1.560770515  | 0.000972088 |
| 17341378 | Zfp942         | 1.26941708   | 0.000972088 |
| 17456995 | Mkln1          | 0.82263863   | 0.000975446 |
| 17546055 | Egfl6          | 2.163950854  | 0.000977282 |
| 17304976 | Mapk8          | 0.919767916  | 0.000977282 |
| 17472847 | Asun           | 0.746188375  | 0.000980285 |
| 17330443 | Gap43          | 1.06431986   | 0.000980285 |
| 17366774 | mmu-mir-466c-1 | 2.357089857  | 0.000980285 |
| 17366784 | mmu-mir-466c-1 | 2.357089857  | 0.000980285 |
| 17366820 | mmu-mir-466c-1 | 2.357089857  | 0.000980285 |
| 17384455 |                | 1.690072354  | 0.000980285 |
| 17280609 | Pik3cg         | -1.215318776 | 0.000981165 |
| 17546192 | Hccs           | 0.860143672  | 0.000985986 |
| 17517481 | Ube2q2         | 1.019576455  | 0.000986593 |
| 17280498 | Dld            | 0.895495533  | 0.000992938 |
| 17441105 | Coq5           | 1.48177619   | 0.000995324 |
| 17472030 | Dusp16         | 1.110496926  | 0.000995431 |
| 17541721 | Mir542         | -1.280769029 | 0.001004423 |
| 17348492 | Lama3          | 0.892196058  | 0.00100581  |
| 17423121 | Car8           | 2.097179303  | 0.001007146 |
| 17269415 | Krt17          | 2.2313145    | 0.001007146 |
| 17359436 | Lcor           | 1.014439027  | 0.001007146 |
| 17509189 | Ccdc111        | 1.068380955  | 0.001014108 |
| 17234175 | lpmk           | 1.123616686  | 0.001014303 |
| 17203897 |                | 2.458007057  | 0.001014303 |
| 17238722 | H60c           | 1.654392868  | 0.001014565 |
| 17503559 | Cnep1r1        | 0.795758349  | 0.00102031  |
| 17417407 | Pik3r3         | 1.086790147  | 0.00102031  |

|          |               |              |             |
|----------|---------------|--------------|-------------|
| 17486864 | C5ar1         | -1.712380109 | 0.00102227  |
| 17528355 | Usp3          | 0.713752996  | 0.00102227  |
| 17354473 | C330018D20Rik | 1.105895667  | 0.001022904 |
| 17235227 | Cirbp         | 1.058888914  | 0.001022904 |
| 17524141 | Med17         | 1.047880015  | 0.001022904 |
| 17295463 | Ptcd2         | 0.874448772  | 0.001022904 |
| 17213880 | Rpe           | 0.821165645  | 0.001022904 |
| 17216458 | Serpinb2      | 1.785134333  | 0.001022904 |
| 17316021 | Tars          | 0.960601744  | 0.001022904 |
| 17304906 | Wdfy4         | -1.074795816 | 0.001022904 |
| 17205325 |               | -0.923552486 | 0.001022904 |
| 17484104 |               | 0.917807115  | 0.001022904 |
| 17438903 | Afp           | -1.960821816 | 0.001025153 |
| 17281084 | Egln3         | 1.397090833  | 0.001025153 |
| 17399754 | Ilf2          | 0.73617435   | 0.001025153 |
| 17221686 | Kcnq5         | 1.303719324  | 0.001025153 |
| 17223390 | Orc2          | 0.798642093  | 0.001025153 |
| 17360406 | Pdcd4         | 0.879812023  | 0.001025153 |
| 17359769 | Sema4g        | 1.377198364  | 0.001025153 |
| 17415016 | Snpc3         | 0.878273698  | 0.001025153 |
| 17537648 | Cenpi         | 1.496299395  | 0.001026704 |
| 17307203 | Ska3          | 1.306435141  | 0.001026704 |
| 17312511 | Adck5         | 1.191693197  | 0.001027579 |
| 17492619 | Blm           | 0.995579585  | 0.001027579 |
| 17406807 | Rab25         | 1.501173629  | 0.00102946  |
| 17399141 | 2810403A07Rik | 0.798892674  | 0.001030372 |
| 17493368 | Zbtb14        | 0.911518541  | 0.001030463 |
| 17456247 | Cftr          | 1.487679354  | 0.001031052 |
| 17525418 | Hyls1         | 1.395902566  | 0.00103292  |
| 17400966 | Gdap2         | 1.122271488  | 0.001034344 |
| 17248512 | Nudcd2        | 0.850424463  | 0.001034344 |
| 17328187 | Rsl1d1        | 0.729320583  | 0.001040522 |
| 17472023 | Mansc1        | 0.761969324  | 0.001043274 |
| 17415778 | Alg6          | 1.685737645  | 0.001046434 |
| 17440658 | Crybb1        | 1.196222773  | 0.001047138 |
| 17439045 | Thap6         | 1.060975338  | 0.001047138 |
| 17314387 | Cntn1         | 1.395192949  | 0.001051079 |
| 17535233 | Fmr1nb        | 1.825818217  | 0.001051079 |
| 17277411 | Mfsd7c        | 1.534161426  | 0.001051079 |
| 17333505 | Gm3435        | 0.843888237  | 0.001055161 |
| 17542829 | Rab39b        | 1.104219287  | 0.001058491 |
| 17530227 | Slco2a1       | -3.518968044 | 0.001062916 |
| 17492722 | Nmb           | 1.193135917  | 0.001063458 |

|          |               |              |             |
|----------|---------------|--------------|-------------|
| 17453533 |               | 1.000936324  | 0.001063458 |
| 17551079 |               | -3.298877711 | 0.001067181 |
| 17234786 | Icosl         | 0.920013712  | 0.00106719  |
| 17301247 | Pinx1         | 1.128052022  | 0.00106719  |
| 17312223 | BC025446      | 1.747240903  | 0.001069676 |
| 17226049 | Kdsr          | 0.858003123  | 0.001070819 |
| 17252013 | Arrb2         | -1.002108233 | 0.001071394 |
| 17258473 | Itgb4         | 0.894883049  | 0.001077446 |
| 17360877 | Fam45a        | 0.95329056   | 0.001078208 |
| 17302550 | Ndfip2        | 0.742874921  | 0.001080766 |
| 17208429 |               | 1.773840992  | 0.001080766 |
| 17482884 | Lcmt1         | 0.872139842  | 0.001088818 |
| 17257310 | Mettl2        | 0.784488514  | 0.001096328 |
| 17490038 | Gm5593        | 1.307671238  | 0.001098688 |
| 17331481 | Robo2         | 1.490599212  | 0.001098688 |
| 17448847 | Usp46         | 1.145083585  | 0.001098688 |
| 17418357 | Yrdc          | 0.970968162  | 0.001098688 |
| 17551077 |               | -3.308785494 | 0.001099943 |
| 17326756 | Ncam2         | 1.246605034  | 0.001101174 |
| 17428422 | Gm12830       | -0.923411104 | 0.001101823 |
| 17234906 | Tpgs1         | -0.755405056 | 0.001101823 |
| 17239466 |               | 1.140058327  | 0.001105511 |
| 17207647 |               | 2.003912514  | 0.001109632 |
| 17498467 | Ano1          | 1.126879882  | 0.001111797 |
| 17365030 | Chuk          | 1.109032448  | 0.001112664 |
| 17548773 | Map4          | 0.871806094  | 0.001112664 |
| 17306793 | Tinf2         | 1.0016604    | 0.001112664 |
| 17544845 | C330013F16Rik | 0.906632095  | 0.001114245 |
| 17547744 | Cks2          | 0.938015367  | 0.001114245 |
| 17548303 | Cks2          | 0.938015367  | 0.001114245 |
| 17548955 | Gm12891       | 0.938015367  | 0.001114245 |
| 17270761 | Ccdc47        | 0.872071224  | 0.001120333 |
| 17224211 | Tns1          | -1.054430284 | 0.001121282 |
| 17381376 | Cdc123        | 0.824293606  | 0.001123671 |
| 17514760 | Mre11a        | 0.889486126  | 0.001124779 |
| 17539682 | Gm15246       | 1.103291644  | 0.001125023 |
| 17239539 | Hebp2         | 0.951174022  | 0.001125023 |
| 17352347 | Tmx3          | 0.764144043  | 0.001126211 |
| 17551129 |               | -3.065819478 | 0.001127869 |
| 17254537 | Ppm1d         | 1.409171692  | 0.0011286   |
| 17353881 | Arap3         | -1.025697141 | 0.001133886 |
| 17381864 | Trdmt1        | 1.044264496  | 0.001133886 |
| 17254194 | AI662270      | 1.602888282  | 0.001134056 |

|          |                |              |             |
|----------|----------------|--------------|-------------|
| 17489738 | Gpatch1        | 0.810945061  | 0.001134056 |
| 17313858 | Mirlet7c-2     | -0.877992229 | 0.001134056 |
| 17407905 | Prpf3          | 1.106242626  | 0.001134056 |
| 17367594 | Yme1l1         | 0.684765186  | 0.001134056 |
| 17206075 |                | -1.080508289 | 0.001134056 |
| 17211294 | Gdap1          | 1.317849963  | 0.001137696 |
| 17343387 | Akap8l         | 0.83023365   | 0.001138548 |
| 17330998 | Cep97          | 0.988560775  | 0.001138548 |
| 17548112 | LOC100505064   | 0.749770947  | 0.001138548 |
| 17475210 |                | -1.017890486 | 0.001138548 |
| 17240342 | Rpf2           | 1.016898302  | 0.001140933 |
| 17382864 | Qsox2          | 0.885899224  | 0.00114506  |
| 17406091 | Etfdh          | 0.784075967  | 0.001146838 |
| 17529575 | Gm2382         | -1.507960224 | 0.001146931 |
| 17252668 | Trpv3          | 1.38366844   | 0.001146931 |
| 17300375 |                | 1.063895453  | 0.001146931 |
| 17535600 | Dusp9          | 1.518645084  | 0.001146984 |
| 17280292 | Gm9312         | 1.420675984  | 0.001146984 |
| 17233357 | Hsf2           | 1.515807909  | 0.001146984 |
| 17437765 | Klb            | 1.845716414  | 0.001146984 |
| 17366742 | mmu-mir-466b-1 | 2.25085642   | 0.001146984 |
| 17366796 | mmu-mir-466b-1 | 2.25085642   | 0.001146984 |
| 17366808 | mmu-mir-466b-1 | 2.25085642   | 0.001146984 |
| 17366832 | mmu-mir-466b-1 | 2.25085642   | 0.001146984 |
| 17366844 | mmu-mir-466b-1 | 2.25085642   | 0.001146984 |
| 17366868 | mmu-mir-466b-1 | 2.25085642   | 0.001146984 |
| 17280495 |                | 1.379935007  | 0.001146984 |
| 17308482 |                | 2.243114269  | 0.001147859 |
| 17213770 | A730034C02     | 1.433020709  | 0.001148228 |
| 17304514 | Gnl3           | 1.638011242  | 0.001148228 |
| 17474454 | Dmpk           | -1.217706377 | 0.001154105 |
| 17286009 | Tdp2           | 0.721864992  | 0.001154776 |
| 17527694 | Loxl1          | -1.371821781 | 0.0011691   |
| 17427994 | Scp2           | 0.934208463  | 0.0011691   |
| 17395844 | Stmn3          | 1.973531245  | 0.0011691   |
| 17238858 |                | -1.039260654 | 0.0011691   |
| 17404109 | Impa1          | 0.7852617    | 0.001169603 |
| 17212346 | AI597479       | 1.020434246  | 0.0011701   |
| 17533498 | Kdm6a          | 0.955295566  | 0.001171419 |
| 17376493 | Pank2          | 0.802879103  | 0.001171419 |
| 17447310 | Lrpap1         | 0.97929776   | 0.001171911 |
| 17397783 | Eif2a          | 0.722715886  | 0.001173957 |
| 17275303 | Gm1818         | 0.884619733  | 0.001174428 |

|          |               |              |             |
|----------|---------------|--------------|-------------|
| 17325671 | Lsamp         | 1.235686279  | 0.001174428 |
| 17531650 | Pth1r         | 1.263741781  | 0.001177766 |
| 17248074 |               | 1.417310496  | 0.001177766 |
| 17257059 |               | 0.677572569  | 0.001177766 |
| 17366760 | Mir669j       | 1.829237127  | 0.001180457 |
| 17389472 | Scg5          | 1.152959788  | 0.001181239 |
| 17530503 | Col6a6        | -0.782010782 | 0.001185125 |
| 17438963 | Ppbp          | 1.741138872  | 0.001192744 |
| 17511318 | Vps35         | 0.824976951  | 0.001193472 |
| 17354275 | Tmed7         | 0.670395905  | 0.001196623 |
| 17550805 |               | -2.996916589 | 0.001196623 |
| 17541528 | Igsf1         | 1.083821842  | 0.001200767 |
| 17358013 |               | 0.988734514  | 0.001203431 |
| 17229222 | Tipr1         | 0.689675636  | 0.001205117 |
| 17373913 | AI314831      | -1.670351063 | 0.001205901 |
| 17354861 | Fbxo38        | 0.829290673  | 0.001209415 |
| 17460538 | Gkn2          | 3.068249273  | 0.001216631 |
| 17438319 |               | 1.411173554  | 0.001217794 |
| 17463731 | Ddx47         | 0.87017484   | 0.00121811  |
| 17542349 | Haus7         | 1.083079077  | 0.00121811  |
| 17396886 | Gm21388       | -0.832843704 | 0.001223228 |
| 17295697 | Rad17         | 1.286203004  | 0.001223228 |
| 17366890 |               | 2.491038165  | 0.001223228 |
| 17244843 | Syt1          | 1.419036997  | 0.001224908 |
| 17551097 |               | -2.834092521 | 0.001224908 |
| 17502295 | Jak3          | -0.975473973 | 0.001225863 |
| 17231366 | Plekhg1       | 1.434622169  | 0.001225863 |
| 17363204 | Psat1         | 1.154004184  | 0.001225863 |
| 17348079 | Cul2          | 0.740125742  | 0.001229217 |
| 17289539 | 1700099I09Rik | -0.880191054 | 0.001229761 |
| 17434027 | Plekhn1       | 0.834166729  | 0.001231183 |
| 17433731 | Rer1          | 0.784996749  | 0.001231525 |
| 17373844 | 4930500J02Rik | 1.270633864  | 0.001233077 |
| 17292011 | Tfap2a        | 2.316385048  | 0.001233077 |
| 17371011 | Dapl1         | 1.432828524  | 0.001233114 |
| 17247962 | Pnpt1         | 0.987443325  | 0.001233195 |
| 17409594 | Rnpc3         | 1.013973843  | 0.001233195 |
| 17551121 |               | -3.116174398 | 0.001236614 |
| 17430930 | Stx12         | 0.985548886  | 0.001238143 |
| 17337434 | H2-M10.6      | -0.957188181 | 0.00123835  |
| 17302594 | n-R5s50       | -2.343781043 | 0.00123835  |
| 17288585 | Brd9          | 0.974832068  | 0.001244062 |
| 17340433 |               | 2.636466265  | 0.00125127  |



|          |         |              |             |
|----------|---------|--------------|-------------|
| 17490978 | Kcnj14  | -0.808922986 | 0.001252801 |
| 17275882 | Mgat2   | 0.801200066  | 0.001252801 |
| 17351569 | Rnmt    | 0.921406602  | 0.001252801 |
| 17415715 | Usp1    | 0.996917888  | 0.001252801 |
| 17238904 |         | -1.003420179 | 0.001252801 |
| 17430630 | Zcchc17 | 1.220505352  | 0.001255284 |
| 17449155 | Cenpc1  | 0.785244736  | 0.001255754 |
| 17359088 | Cyp26a1 | 1.644178992  | 0.001255754 |
| 17298895 | Mir346  | -1.049964292 | 0.001255754 |
| 17252339 | n-R5s70 | -2.455987116 | 0.001255754 |
| 17232202 | Stx7    | 0.812047893  | 0.001255754 |
| 17252847 |         | 1.398953761  | 0.001255754 |
| 17550689 |         | -2.63570659  | 0.001255754 |
| 17406145 | Gria2   | 1.441830931  | 0.00125673  |
| 17274558 | Mboat2  | 0.822502896  | 0.00125673  |
| 17496989 | Nsmce4a | 0.806989337  | 0.00125673  |
| 17551113 |         | -2.919520007 | 0.001259402 |
| 17543852 | Abcb7   | 1.033548436  | 0.001263037 |
| 17274751 | Sh3yl1  | 1.45916036   | 0.001271676 |
| 17281202 | Ppp2r3c | 1.079046954  | 0.001276882 |
| 17229454 | Rgs4    | 1.182530519  | 0.001283441 |
| 17267617 | Gm15698 | 1.627445068  | 0.001283684 |
| 17324398 | Snora81 | 1.883452405  | 0.001283684 |
| 17261425 | Stc2    | 0.995139986  | 0.001283684 |
| 17390810 | Gatm    | -1.15344972  | 0.001284502 |
| 17384927 | Gtdc1   | 0.667336175  | 0.001284502 |
| 17476247 | Zfp568  | 1.149548518  | 0.001284502 |
| 17278345 | Glrx5   | 0.997230941  | 0.001285646 |
| 17298805 | Glud1   | 0.852767405  | 0.001286691 |
| 17385654 | Itgb6   | 1.032693139  | 0.001286691 |
| 17335383 | Mapk13  | 1.000857641  | 0.001286691 |
| 17440257 | Pcgf3   | 0.907337283  | 0.001286691 |
| 17289289 | Poc5    | 0.908551919  | 0.001286691 |
| 17515413 | Pigyl   | 1.151417577  | 0.001288987 |
| 17282139 | Pigh    | 0.930504319  | 0.001289243 |
| 17544631 | Nxf7    | 2.003326711  | 0.001290974 |
| 17488179 | Ltbp4   | -1.119392765 | 0.001297224 |
| 17319366 | Cbx7    | 1.028449139  | 0.001297233 |
| 17460587 |         | 0.92339608   | 0.001297233 |
| 17467664 | Ptcd3   | 0.79953462   | 0.001298865 |
| 17457472 | Tbxas1  | -1.19910516  | 0.001304699 |
| 17413300 | Rusc2   | -0.813861022 | 0.001306515 |
| 17442082 | Gpn3    | 1.045343949  | 0.001307838 |

|          |           |              |             |
|----------|-----------|--------------|-------------|
| 17517924 | Hcn4      | -1.419015104 | 0.001307838 |
| 17537248 | Apool     | 0.920142767  | 0.001310791 |
| 17440201 | Pigg      | 0.88124648   | 0.001313972 |
| 17208033 |           | 1.496710836  | 0.001314443 |
| 17307774 | Esco2     | 1.026560864  | 0.001323527 |
| 17338233 | Mrps10    | 0.7524467    | 0.001323527 |
| 17349311 | Wdr36     | 0.90634898   | 0.001323527 |
| 17304493 | Gnl3      | 0.704646734  | 0.001330653 |
| 17399164 | Rit1      | 0.899425837  | 0.001331288 |
| 17206481 |           | 1.32410726   | 0.001334214 |
| 17505197 | Cirh1a    | 0.886875113  | 0.001335991 |
| 17355298 | Dynap     | 2.69031185   | 0.001335991 |
| 17248800 | Med7      | 0.78469778   | 0.001335991 |
| 17352196 | Mir5112   | -2.230180869 | 0.001335991 |
| 17493643 | Mogat2    | -0.799095253 | 0.001335991 |
| 17434973 | Sema3c    | 1.617957262  | 0.001335991 |
| 17544385 | Tspan6    | 1.013290739  | 0.001335991 |
| 17395702 |           | 1.302352413  | 0.001335991 |
| 17306419 |           | -0.892632478 | 0.001335991 |
| 17219431 | Gm10521   | -1.197310094 | 0.001336618 |
| 17469705 | Camk1     | -1.059864683 | 0.001342992 |
| 17324916 | Fytd1     | 0.820027247  | 0.001342992 |
| 17302054 | Snora31   | 1.280101526  | 0.001349283 |
| 17293757 | Hiatl1    | 1.038501528  | 0.001349609 |
| 17256273 | Gm11940   | 1.675214166  | 0.00135285  |
| 17216727 | Slc35f5   | 0.862744546  | 0.00135285  |
| 17252200 | Kif1c     | -0.816731805 | 0.001353256 |
| 17313751 | Arhgap8   | 1.008873759  | 0.001353958 |
| 17442909 | Gbas      | 0.916840658  | 0.001353958 |
| 17213295 | Nop58     | 0.809361501  | 0.001353958 |
| 17233536 | P4ha1     | 0.740839106  | 0.001355053 |
| 17341148 | LOC106740 | 0.988729328  | 0.001356605 |
| 17265451 | Derl2     | 0.954226181  | 0.001358456 |
| 17378848 | Snhg11    | 1.143751017  | 0.001358456 |
| 17283941 |           | 2.150378215  | 0.001358456 |
| 17333222 | Agpat4    | 1.058419491  | 0.001360953 |
| 17507171 | Cd209a    | -1.337485792 | 0.001360953 |
| 17409690 | Rtca      | 1.440828321  | 0.001360953 |
| 17301489 | Stmn4     | 1.30768559   | 0.001360953 |
| 17292689 | Thoc3     | 0.920423219  | 0.001360953 |
| 17277766 | Tshr      | 1.019633553  | 0.001360953 |
| 17308478 |           | 1.126735066  | 0.001360953 |
| 17445568 | Dmtf1     | 0.756286902  | 0.001365656 |

|          |               |              |             |
|----------|---------------|--------------|-------------|
| 17462092 | Zfand4        | 0.858383536  | 0.001367925 |
| 17440136 | Mtf2          | 0.814953488  | 0.001369678 |
| 17476119 | Ppp1r14a      | -1.114648552 | 0.001369678 |
| 17298139 | Actr8         | 0.872355226  | 0.001374173 |
| 17525405 | Ddx25         | 1.048625095  | 0.001374173 |
| 17214053 | Xrcc5         | 0.828529551  | 0.00137578  |
| 17329243 | Liph          | 1.407753594  | 0.001384386 |
| 17412813 | Nfx1          | 0.81583774   | 0.001384847 |
| 17488470 | Samd4b        | -0.831053301 | 0.001396205 |
| 17231717 | Fuca2         | 0.768542629  | 0.001398365 |
| 17401335 | Slc16a1       | 1.285589691  | 0.001398365 |
| 17417290 | Atpaf1        | 0.863000934  | 0.001403561 |
| 17330391 | Poglut1       | 0.7943507    | 0.001403561 |
| 17493739 | Pold3         | 1.000919212  | 0.001403561 |
| 17302251 | Sugt1         | 0.723581239  | 0.001403561 |
| 17332122 | Tmem50b       | 1.301793063  | 0.001403561 |
| 17429546 | Zmpste24      | 0.880983835  | 0.001403561 |
| 17550390 |               | 1.119186366  | 0.001403561 |
| 17412645 | Akirin2       | 0.657606416  | 0.001405369 |
| 17538354 | Mir680-2      | -0.740172478 | 0.001405369 |
| 17438788 | Rufy3         | 1.176687848  | 0.001409854 |
| 17551093 |               | -2.543975905 | 0.001421    |
| 17331720 | Adamts5       | -1.068770235 | 0.001421    |
| 17281428 | Mis18bp1      | 0.934883827  | 0.001423959 |
| 17319037 | Rac2          | -1.456175163 | 0.001423959 |
| 17475215 |               | -1.178701182 | 0.001423959 |
| 17396702 | Zfp639        | 1.026200107  | 0.001424158 |
| 17450091 | 5430416N02Rik | 0.828970857  | 0.001426279 |
| 17370843 | Arl6ip6       | 0.870699733  | 0.001430088 |
| 17302238 | Elf1          | 0.838584855  | 0.001432755 |
| 17241038 | Anapc16       | 0.849077434  | 0.001435628 |
| 17267553 | Gm11508       | 1.442573034  | 0.001435628 |
| 17312882 | H1f0          | 0.671983069  | 0.001435628 |
| 17375911 | Mrps5         | 0.855411353  | 0.001435628 |
| 17340285 | Msh2          | 1.031657062  | 0.001435628 |
| 17210261 |               | 1.313217254  | 0.001435628 |
| 17210283 |               | 1.313217254  | 0.001435628 |
| 17539167 | Map7d2        | 0.828512347  | 0.001446309 |
| 17276732 | Eif2s1        | 0.821645751  | 0.001450071 |
| 17441895 | Naa25         | 0.827344445  | 0.001450071 |
| 17481260 | Trim6         | 1.204923564  | 0.001450071 |
| 17324402 |               | 1.436453438  | 0.001450071 |
| 17403866 | Ptger3        | 1.568425308  | 0.001450684 |

|          |               |              |             |
|----------|---------------|--------------|-------------|
| 17248072 |               | 0.876293273  | 0.001451028 |
| 17220907 | Irf6          | 1.377302879  | 0.001452139 |
| 17505913 | Cenpn         | 1.390607299  | 0.001456597 |
| 17513603 | Zcchc14       | -1.010201964 | 0.00146277  |
| 17330486 | Qtrtd1        | 0.904284972  | 0.001462889 |
| 17535171 |               | 0.902939729  | 0.001464896 |
| 17423340 | Tmem67        | 1.194540996  | 0.001471457 |
| 17514691 | Mtmr2         | 0.752523456  | 0.00147343  |
| 17382186 | Spopl         | 1.062632837  | 0.00147343  |
| 17460728 | Txnrd3        | 0.840759024  | 0.00147343  |
| 17328153 | Zc3h7a        | 0.730275242  | 0.00147343  |
| 17281497 | Dnaaf2        | 0.698043385  | 0.001473936 |
| 17470031 | Alox5         | -1.115430141 | 0.00147443  |
| 17375308 | Wdr76         | 1.367510386  | 0.001481854 |
| 17373857 | Cstf3         | 1.016042426  | 0.001486895 |
| 17260744 | E230015J15Rik | 0.816537745  | 0.001488623 |
| 17295212 | Polk          | 0.787123461  | 0.001493339 |
| 17504374 |               | -2.659617369 | 0.001501696 |
| 17539898 | Ccdc120       | 0.754910437  | 0.001503188 |
| 17448905 | Chic2         | 0.781076038  | 0.001503188 |
| 17305167 | Ghitm         | 0.686035685  | 0.001503188 |
| 17395300 | Gm14402       | 2.05445632   | 0.001503188 |
| 17529383 | Pgm3          | 1.531001595  | 0.001503188 |
| 17454360 | Prkar1b       | 0.737389294  | 0.001503188 |
| 17325619 | Tmem39a       | 0.81818821   | 0.001503188 |
| 17344309 | Tnf           | -0.965149073 | 0.001503188 |
| 17250325 | Med9          | 0.832319376  | 0.001515321 |
| 17371374 | Cers6         | 0.886355731  | 0.001516747 |
| 17419131 | Col16a1       | -0.896610707 | 0.001516747 |
| 17288716 | Glrx          | 0.806598996  | 0.001516747 |
| 17303147 | Gm3591        | 0.869734653  | 0.001516747 |
| 17416448 | Hspb11        | 0.678013036  | 0.001516747 |
| 17240538 | Lace1         | 1.271749981  | 0.001516747 |
| 17550556 | mt-Tf         | 1.335261933  | 0.001516747 |
| 17445257 | Rbm48         | 0.872448447  | 0.001516747 |
| 17407864 | Tars2         | 0.958758945  | 0.001516747 |
| 17350203 | Spink5        | 1.070272871  | 0.001518091 |
| 17541217 | C1galt1c1     | 0.691650945  | 0.00152004  |
| 17253570 | Spag5         | 1.211077682  | 0.001521209 |
| 17366542 | Nudt5         | 0.755337651  | 0.001526614 |
| 17498884 | A630009H07Rik | -1.120229993 | 0.001526832 |
| 17549250 | Rfk           | 1.133840117  | 0.001526832 |
| 17549324 | Rfk           | 1.133840117  | 0.001526832 |

|          |               |              |             |
|----------|---------------|--------------|-------------|
| 17548315 | C1qb          | -1.946820545 | 0.001528376 |
| 17469952 | Mbd4          | 1.12779338   | 0.001528376 |
| 17300279 | Mmp14         | -0.900372812 | 0.00153472  |
| 17480485 | Lrrc32        | -1.630108604 | 0.001539778 |
| 17274940 | Atxn7l1       | -0.891183112 | 0.001541184 |
| 17536818 | Ogt           | 0.710826714  | 0.001541184 |
| 17288695 | Pcsk1         | -0.788612281 | 0.001545244 |
| 17527984 | A730043L09Rik | -0.913110883 | 0.001556921 |
| 17391452 |               | -0.86593586  | 0.001556921 |
| 17357226 |               | 0.853901331  | 0.001557941 |
| 17422959 | Tmem68        | 1.096521809  | 0.001558851 |
| 17333493 | 9030025P20Rik | 0.854352819  | 0.001559245 |
| 17219264 | B4galt3       | 1.263199441  | 0.001562878 |
| 17523095 | Exog          | 0.854632751  | 0.001562878 |
| 17274267 | Nol10         | 0.971572475  | 0.001562878 |
| 17258867 | Birc5         | 1.357568037  | 0.001562901 |
| 17391112 | Gabpb1        | 0.779629706  | 0.001562901 |
| 17283930 | LOC101056688  | 1.306850195  | 0.001565906 |
| 17283942 |               | 1.308278292  | 0.001570615 |
| 17540589 | Klhl13        | 0.720673297  | 0.001571158 |
| 17463747 | Gprc5a        | 0.700844421  | 0.001576321 |
| 17395703 |               | 0.980718451  | 0.001576321 |
| 17293870 | Mterfd1       | 0.815726617  | 0.001579231 |
| 17549370 | Nsg2          | 0.98364803   | 0.001579231 |
| 17549748 | Nsg2          | 0.98364803   | 0.001579231 |
| 17470119 | Ret           | 1.103780887  | 0.001579231 |
| 17358007 | Rfk           | 0.959340073  | 0.001579231 |
| 17415469 | Tek           | 2.300012255  | 0.001579504 |
| 17274875 | Nampt         | 0.678417715  | 0.001580118 |
| 17509435 | Cep44         | 0.831300044  | 0.001582027 |
| 17214257 | Rqcd1         | 1.070238636  | 0.001582027 |
| 17436481 | Fgfr3         | 1.329388436  | 0.001584675 |
| 17500301 | Gpr124        | -0.924904972 | 0.001584675 |
| 17360115 | Taf5          | 0.893324241  | 0.001584675 |
| 17332893 | Tmem181a      | 1.212924349  | 0.001584675 |
| 17266629 | Utp6          | 0.925236277  | 0.001584675 |
| 17201013 |               | 1.953176485  | 0.001584839 |
| 17527032 | Ddx10         | 1.107015952  | 0.001586714 |
| 17307117 | Gjb2          | 1.473380144  | 0.001589009 |
| 17291355 | Acot13        | 0.924861094  | 0.001592696 |
| 17279324 | Inf2          | -0.916695976 | 0.001592696 |
| 17545899 | S100g         | 1.40159463   | 0.001592696 |
| 17501569 | Nat2          | 0.900556329  | 0.001596337 |

|          |          |              |             |
|----------|----------|--------------|-------------|
| 17237284 | Krr1     | 0.925447243  | 0.00159666  |
| 17359098 | Cep55    | 1.08774713   | 0.001597561 |
| 17399776 | S100a14  | 1.3731341    | 0.001597777 |
| 17392452 | Crnk1    | 0.682353339  | 0.001598304 |
| 17248064 | Mtif2    | 0.85370812   | 0.001608912 |
| 17538990 | Rragb    | 1.541107905  | 0.001608912 |
| 17204523 |          | 1.447518539  | 0.001609473 |
| 17327909 | Ppl      | 1.232305044  | 0.001616323 |
| 17325849 | BC027231 | 0.814486201  | 0.001617575 |
| 17279161 |          | 0.922156142  | 0.001618189 |
| 17491600 |          | 1.291327758  | 0.001618189 |
| 17528850 | Tmod3    | 0.917285427  | 0.00161945  |
| 17324378 | Eif4a2   | 0.725163887  | 0.00161989  |
| 17218261 | Ncf2     | -1.194467405 | 0.00161989  |
| 17358015 |          | 1.021029014  | 0.001622473 |
| 17311199 | Dcaf13   | 0.667851499  | 0.001631685 |
| 17265111 | Elp5     | 0.961315727  | 0.001636146 |
| 17472233 |          | -1.672517525 | 0.001636146 |
| 17278647 | Dlk1     | -1.826036641 | 0.001642254 |
| 17517592 | Cspg4    | -0.78853679  | 0.001643854 |
| 17541846 | Mmgt1    | 0.983349231  | 0.001643854 |
| 17357551 |          | -0.668722341 | 0.001643854 |
| 17315669 | AW549877 | 1.167758238  | 0.001652949 |
| 17390879 | Fbn1     | -1.321257726 | 0.001655606 |
| 17295757 | Gm5593   | 0.954987092  | 0.001665353 |
| 17313767 | Nup50    | 0.824950457  | 0.001665353 |
| 17278561 | Eml1     | -0.741679487 | 0.00166586  |
| 17236638 | Fgd6     | 0.921217197  | 0.00166586  |
| 17426434 | Dbc1     | 1.433782309  | 0.001667997 |
| 17551089 |          | -2.76701231  | 0.001667997 |
| 17455111 | Cyp3a16  | -0.977212018 | 0.001670884 |
| 17407738 | Mllt11   | 1.206770104  | 0.001673146 |
| 17205017 |          | 0.836513448  | 0.001675984 |
| 17295422 | Tnpo1    | 0.715182327  | 0.001676118 |
| 17514806 | Taf1d    | 0.738009291  | 0.00168364  |
| 17457381 | Ttc26    | 1.238493508  | 0.00168364  |
| 17545595 | Sat1     | 0.939724054  | 0.001688851 |
| 17279155 |          | 0.729367887  | 0.001699785 |
| 17442165 | Rnf34    | 0.666483606  | 0.001699814 |
| 17306950 | Mcpt-ps1 | 1.000632903  | 0.001700045 |
| 17451431 | Tmem119  | -0.694260632 | 0.001700068 |
| 17514871 | Chordc1  | 0.898029096  | 0.001702049 |
| 17254347 | Ddx52    | 0.782420042  | 0.001705062 |

|          |               |              |             |
|----------|---------------|--------------|-------------|
| 17263416 | Zfp867        | 1.449485434  | 0.001705232 |
| 17445507 | Dbf4          | 1.2004976    | 0.001705485 |
| 17288970 | Ccnh          | 0.686025087  | 0.001706557 |
| 17537677 | Drp2          | 0.771796947  | 0.001706557 |
| 17249176 | Hnrnp1        | 0.810198293  | 0.001706557 |
| 17532113 | Oxsr1         | 1.004897865  | 0.001708521 |
| 17397297 | 3110057O12Rik | 1.090813103  | 0.001712222 |
| 17291053 | Hist1h4i      | 1.942424618  | 0.001715862 |
| 17281609 | L2hgdh        | 0.730728943  | 0.001715862 |
| 17236604 | Ntn4          | 0.834527652  | 0.001715862 |
| 17248075 |               | 1.383755192  | 0.001716322 |
| 17244378 | Metap2        | 0.670228187  | 0.00172017  |
| 17398399 | 4930579G24Rik | 1.192301058  | 0.001722821 |
| 17478864 | Mtmr10        | 1.066045767  | 0.001722821 |
| 17204377 |               | -1.137470252 | 0.001722821 |
| 17296896 | Gm3173        | 1.069273607  | 0.001725246 |
| 17308361 | Bmp1          | -0.940201229 | 0.001733276 |
| 17537839 | Gprasp2       | 0.760127348  | 0.001733276 |
| 17548283 | H3f3b         | 0.681872192  | 0.001733276 |
| 17417422 | Ipp           | 1.134677371  | 0.001733276 |
| 17263063 | 2010001A14Rik | -1.239087388 | 0.00173498  |
| 17281181 | 2700097O09Rik | 1.323321013  | 0.00173498  |
| 17240365 | Amd1          | 0.7513979    | 0.00173498  |
| 17449629 |               | 0.81414363   | 0.001735794 |
| 17261009 | B3gnt2        | 0.759230578  | 0.001739917 |
| 17356369 | Cd248         | -1.142605207 | 0.001739917 |
| 17367908 |               | -0.845941065 | 0.001739917 |
| 17449518 |               | 0.732853233  | 0.001739917 |
| 17212874 | E330011M16Rik | 0.73664772   | 0.001751418 |
| 17241396 | Vps26a        | 0.698918732  | 0.001754161 |
| 17285964 | Fam65b        | 0.858511811  | 0.001757598 |
| 17244102 | Scyl2         | 0.705037908  | 0.001757598 |
| 17424057 | Smu1          | 0.633448152  | 0.001757598 |
| 17325651 | Igsf11        | 1.594247271  | 0.00175851  |
| 17361855 | Pola2         | 0.88681823   | 0.001758868 |
| 17455752 | Ccdc132       | 0.889712795  | 0.001759723 |
| 17376167 | Sirpa         | -1.056427912 | 0.001759723 |
| 17408646 |               | -0.881376761 | 0.001759723 |
| 17248592 | Slu7          | 0.762641787  | 0.001762437 |
| 17464404 | Mrps35        | 0.992888868  | 0.001762625 |
| 17437390 | Pi4k2b        | 0.816109131  | 0.001762625 |
| 17459014 | Abcg2         | 1.098247679  | 0.00176564  |
| 17334302 | 2610019E17Rik | -0.933655243 | 0.001766376 |

|          |               |              |             |
|----------|---------------|--------------|-------------|
| 17393501 | Rbm39         | 0.673281665  | 0.001776996 |
| 17294302 | Trip13        | 1.353086694  | 0.001776996 |
| 17495262 | Rras2         | 0.72849808   | 0.001778403 |
| 17510701 | Rbmxl1        | 0.830702105  | 0.001779215 |
| 17294135 | Srd5a1        | 1.220844068  | 0.001779215 |
| 17260167 | Ccdc117       | 0.687854797  | 0.001781008 |
| 17546016 | Ofd1          | 0.78369106   | 0.001782846 |
| 17298488 | Oxnad1        | 1.411713949  | 0.001782846 |
| 17299965 | Trav16d-dv11  | -1.273780726 | 0.001783416 |
| 17276934 | Ttc9          | 1.159953507  | 0.001787343 |
| 17450645 | Glmn          | 0.671749057  | 0.001791818 |
| 17424621 | Sit1          | -0.816672526 | 0.001791818 |
| 17328897 | Dgcr8         | 0.817352021  | 0.001805541 |
| 17506249 | Gse1          | -0.886770946 | 0.001805541 |
| 17449073 | Noa1          | 0.912650323  | 0.001805541 |
| 17480813 | Stard10       | 0.887785658  | 0.001809528 |
| 17503431 | Orc6          | 0.847583171  | 0.001809939 |
| 17506697 | Rhou          | 1.032239324  | 0.001810204 |
| 17338416 | Trem2         | -1.302678124 | 0.00181771  |
| 17288294 | Zfp759        | 1.66965272   | 0.00181803  |
| 17539658 | Arhgap6       | 1.157111724  | 0.001821775 |
| 17205747 |               | 1.343070184  | 0.001821775 |
| 17330705 |               | -1.234483212 | 0.001821775 |
| 17429586 | Gm8359        | -0.91118616  | 0.001826032 |
| 17448166 |               | -1.814489242 | 0.001826046 |
| 17465037 | Gm20186       | 1.364566052  | 0.00182928  |
| 17500922 | Pdlim3        | -0.959270191 | 0.001834187 |
| 17241637 | Nrbf2         | 0.852904205  | 0.001834575 |
| 17230432 | Psen2         | -0.650250239 | 0.001834575 |
| 17358051 | Trpm6         | 1.314389419  | 0.001834575 |
| 17316415 | Stk3          | 0.698439034  | 0.001837367 |
| 17524698 | Cdkn2d        | 0.720311694  | 0.001838627 |
| 17421392 | Gm13235       | 1.038202258  | 0.001838627 |
| 17476860 |               | -1.033977143 | 0.001838627 |
| 17532593 | mt-Tf         | 1.333414681  | 0.001839213 |
| 17300328 | 1700123O20Rik | 0.84561241   | 0.00183952  |
| 17411319 | Rabggtb       | 1.753892137  | 0.001844642 |
| 17499560 | Agpat5        | 0.673038262  | 0.001846815 |
| 17236787 | Btg1          | 0.841695679  | 0.001849397 |
| 17425533 | Epb4.1l4b     | 0.984535833  | 0.001851446 |
| 17315514 | Hoxc8         | -1.230552583 | 0.001857946 |
| 17290398 | Gtpbp4        | 0.806400436  | 0.001860389 |
| 17278763 |               | 1.156632498  | 0.001860389 |



|          |               |              |             |
|----------|---------------|--------------|-------------|
| 17420270 | Usp48         | 0.758216656  | 0.00186204  |
| 17460465 | Asprv1        | 1.895080746  | 0.001862096 |
| 17469030 | Chchd4        | 0.773731101  | 0.001862096 |
| 17248476 | Pank3         | 0.843306865  | 0.001862096 |
| 17223283 | Satb2         | 1.236186362  | 0.001862096 |
| 17323065 |               | 1.604331874  | 0.001862096 |
| 17283937 |               | 1.230561921  | 0.001868164 |
| 17278876 | Mir453        | 1.326185425  | 0.001869451 |
| 17458573 | Snx10         | 0.890245165  | 0.001869451 |
| 17404976 | Mfsd8         | 1.264649565  | 0.001873011 |
| 17551131 |               | -2.848395696 | 0.001873011 |
| 17305015 | Fam35a        | 1.066057217  | 0.001873759 |
| 17506917 | Kcnk1         | 1.157598786  | 0.001878534 |
| 17376993 | Pcsk2         | 0.893263239  | 0.001878534 |
| 17381657 | Rbm17         | 0.669301175  | 0.001878534 |
| 17330602 | Gtpbp8        | 0.867725073  | 0.001887842 |
| 17472927 | Ergic2        | 0.930197293  | 0.001890608 |
| 17443742 | Zscan21       | 0.989956906  | 0.001890608 |
| 17530298 |               | 1.509589238  | 0.001892159 |
| 17225693 | Mterfd2       | 0.724701272  | 0.001898088 |
| 17392572 | Cd93          | -1.847318213 | 0.001904841 |
| 17296688 | Gm10413       | 1.114014107  | 0.001904841 |
| 17296631 | Gm3667        | 1.114014107  | 0.001904841 |
| 17203099 |               | 1.891073221  | 0.001912248 |
| 17536383 | F630028O10Rik | -0.770821914 | 0.001912337 |
| 17230780 | lars2         | 0.879373492  | 0.001912337 |
| 17300195 | Traj28        | -1.554093073 | 0.001912337 |
| 17295308 | Arhgef28      | 0.781700722  | 0.001918799 |
| 17499353 | Cdc16         | 0.695912264  | 0.001918799 |
| 17440387 | Chfr          | 0.790632517  | 0.001918799 |
| 17396498 | Rpl22l1       | -0.849691561 | 0.001918799 |
| 17205883 |               | -1.359491302 | 0.001918799 |
| 17231574 | Ppil4         | 0.75929605   | 0.001921849 |
| 17530000 | Pik3cb        | 0.89205327   | 0.001921909 |
| 17355862 | Timm21        | 0.931656119  | 0.001923409 |
| 17254089 | Zfp830        | 0.913213339  | 0.001923652 |
| 17422885 | 9430015G10Rik | 1.162400539  | 0.00192382  |
| 17278694 | Mir540        | -1.441219224 | 0.00192382  |
| 17247823 | Pus10         | 1.037986075  | 0.001926018 |
| 17238667 | Olfr787       | -1.306295069 | 0.001926254 |
| 17230087 | Ifi203        | -0.757403038 | 0.001930379 |
| 17216792 | Ccnt2         | 0.650952723  | 0.001933864 |
| 17345335 | Polr1c        | 0.949774627  | 0.001937477 |

|          |               |              |             |
|----------|---------------|--------------|-------------|
| 17265973 | Gm12336       | -0.861474466 | 0.001939666 |
| 17527565 | Csk           | -0.740026289 | 0.001940809 |
| 17526923 | Hspb2         | 0.843097594  | 0.001940809 |
| 17535319 | Mtmt1         | 0.91347197   | 0.001940809 |
| 17408648 | Olfml3        | -0.678725281 | 0.001940809 |
| 17326604 | Robo1         | 1.174279972  | 0.001940809 |
| 17299288 | Samd4         | -0.82030996  | 0.001940809 |
| 17548858 | Xlr4b         | 1.648324443  | 0.001940809 |
| 17245511 | Xpot          | 0.864568591  | 0.001940809 |
| 17404474 | Yae1d1        | 0.783655857  | 0.001940809 |
| 17524944 | Zfp599        | 1.080904114  | 0.001940809 |
| 17516613 |               | 0.987456068  | 0.001940809 |
| 17201103 |               | 2.044474648  | 0.001940809 |
| 17205009 |               | 1.060822375  | 0.001940809 |
| 17550707 |               | -2.499653855 | 0.001940809 |
| 17279749 | 1110002L01Rik | 0.918663953  | 0.001941285 |
| 17452897 | Ncor2         | -0.938714235 | 0.001941285 |
| 17461499 | Thumpd3       | 0.770291795  | 0.001943298 |
| 17446836 | Mpv17         | 0.910625688  | 0.001945027 |
| 17349552 | Snhg4         | -1.117124305 | 0.001945027 |
| 17276983 | n-R5s62       | -1.864955901 | 0.001947046 |
| 17401500 | Dram2         | 0.868623487  | 0.001950501 |
| 17551069 |               | -2.627586472 | 0.001950706 |
| 17462872 | C1ra          | -1.144107667 | 0.001951837 |
| 17550691 |               | -2.395018058 | 0.001953937 |
| 17210795 |               | -1.475081225 | 0.00196216  |
| 17239435 | Gpr126        | 0.96867431   | 0.001963568 |
| 17447803 | Fbxl5         | 0.748674567  | 0.001966972 |
| 17279160 |               | 0.98239179   | 0.001966972 |
| 17266611 | 4930542H20Rik | -0.720027089 | 0.001968902 |
| 17435702 | Dnajb6        | 0.680609033  | 0.001969824 |
| 17231891 | Map3k5        | 0.910499763  | 0.001969824 |
| 17255663 | Copz2         | -0.846712195 | 0.001976177 |
| 17269809 | Ezh1          | 1.286241061  | 0.001976177 |
| 17213645 | Fastkd2       | 0.918587415  | 0.001976177 |
| 17310530 | Cdh10         | 1.505302882  | 0.00197972  |
| 17459157 | Smarcad1      | 0.866678847  | 0.00197972  |
| 17538206 | Atg4a         | 1.217101732  | 0.002002613 |
| 17342581 | Decr2         | 0.774332226  | 0.002004685 |
| 17412237 | Mms22l        | 0.957103653  | 0.002004685 |
| 17252827 | Tsr1          | 0.787565877  | 0.002004685 |
| 17280760 | Bzw2          | 1.184004046  | 0.002005623 |
| 17290238 | Calml3        | 1.172209612  | 0.002008855 |

|          |          |              |             |
|----------|----------|--------------|-------------|
| 17237547 | Cpm      | 1.489507393  | 0.002008855 |
| 17432988 | Tardbp   | 1.128270373  | 0.002008855 |
| 17277816 | Zc3h14   | 0.795988867  | 0.002008855 |
| 17276254 |          | 1.081313678  | 0.002017245 |
| 17538817 |          | -0.931468322 | 0.002017245 |
| 17483385 | Phkg2    | 0.807275312  | 0.002019458 |
| 17289695 | Smim15   | 0.846343778  | 0.00202149  |
| 17372705 | Tnks1bp1 | -0.920442606 | 0.002024535 |
| 17218813 | Mettl18  | 0.810898954  | 0.002027149 |
| 17396593 | Sec62    | 0.658359141  | 0.002029475 |
| 17366876 |          | 1.891713312  | 0.002029475 |
| 17249328 | Agxt2l2  | 0.748025138  | 0.002036985 |
| 17548671 | Gm19274  | -0.924176064 | 0.002036985 |
| 17276323 | Gm8075   | -0.773237128 | 0.002036985 |
| 17396614 | Prkci    | 0.851984963  | 0.002036985 |
| 17467753 | Mat2a    | 0.949737363  | 0.002041514 |
| 17301428 | Pbk      | 0.78733349   | 0.00204555  |
| 17413528 | Melk     | 1.438105534  | 0.00204714  |
| 17411815 | Fsbp     | 0.763074284  | 0.002047153 |
| 17293695 | Aaed1    | 0.839381601  | 0.002049291 |
| 17210305 |          | -1.448010069 | 0.002054875 |
| 17518780 | Car12    | 1.236513516  | 0.002056947 |
| 17428645 | Tmem69   | 0.746410398  | 0.002056947 |
| 17449633 |          | 1.410178159  | 0.002056947 |
| 17237412 | Tspan8   | 1.448160795  | 0.002057558 |
| 17479899 | Mesdc2   | 0.806974905  | 0.002060691 |
| 17538832 |          | -1.397561537 | 0.002060691 |
| 17505782 | Terf2ip  | 0.881600727  | 0.002064205 |
| 17295745 | Cenph    | 1.051782024  | 0.002065141 |
| 17303504 | Cadps    | 1.078109561  | 0.002069068 |
| 17300929 |          | 0.991383074  | 0.002069068 |
| 17344909 | Olfr761  | -0.972238043 | 0.002069678 |
| 17396710 | Mfn1     | 0.845347075  | 0.002071197 |
| 17360950 | Ppp6r3   | 0.719203399  | 0.002092513 |
| 17428116 | Btf3l4   | 0.657936339  | 0.00209256  |
| 17338670 | Fsd1     | 1.04770659   | 0.00209256  |
| 17464580 | Bet1     | 0.824910529  | 0.002099427 |
| 17426166 | Cdc26    | 0.856569961  | 0.002100467 |
| 17230055 | Gm16340  | -0.75777904  | 0.002103807 |
| 17539084 | n-R5s16  | -2.422728284 | 0.002106158 |
| 17388435 | Tspan18  | -1.355608588 | 0.002106158 |
| 17530137 | Slc35g2  | 1.382251393  | 0.002109206 |
| 17443901 | Fam20c   | -0.873103303 | 0.00211267  |

|          |               |              |             |
|----------|---------------|--------------|-------------|
| 17432173 | Clcnkb        | -0.651962573 | 0.002118187 |
| 17262478 | Hnrnpab       | 0.704844002  | 0.002118187 |
| 17499922 | Mrps31        | 0.74884529   | 0.002118187 |
| 17412636 |               | -1.14635838  | 0.002118187 |
| 17467015 | Nod1          | -0.987280284 | 0.002119815 |
| 17246284 | Suox          | 0.911620156  | 0.002121453 |
| 17467456 |               | -0.765664154 | 0.002123753 |
| 17306775 | Mdp1          | 0.781871914  | 0.002128415 |
| 17523474 | Zkscan7       | 1.645166385  | 0.002128415 |
| 17447365 | Htra3         | -0.749463222 | 0.002129678 |
| 17493869 | P2ry6         | -1.181683882 | 0.002130729 |
| 17467115 | Kbtbd2        | 0.788288897  | 0.002135442 |
| 17296476 | Mrps30        | 0.967929401  | 0.002135442 |
| 17428066 | Prpf38a       | 0.626654168  | 0.002138231 |
| 17246967 | Xbp1          | 0.70368331   | 0.002144269 |
| 17523695 | Aasdhpt       | 0.891713431  | 0.002153088 |
| 17421444 | Gm13247       | 0.671999642  | 0.002156533 |
| 17321951 | Krt6a         | 2.490576607  | 0.002160732 |
| 17203565 |               | -1.041804143 | 0.002160732 |
| 17548188 | Ythdf1        | 1.03450619   | 0.002160821 |
| 17324274 | Senp2         | 0.706362563  | 0.002164927 |
| 17424119 | Aqp3          | 1.212489112  | 0.002165589 |
| 17495302 |               | 1.111344061  | 0.002165589 |
| 17366726 |               | 2.024673563  | 0.002170869 |
| 17214162 | Gpbar1        | -1.133973114 | 0.002180423 |
| 17302138 |               | 1.148569638  | 0.002182979 |
| 17476595 | G630030J09Rik | -0.745405817 | 0.002183901 |
| 17300638 | Gmpr2         | 1.309405329  | 0.002186882 |
| 17394582 | Prex1         | -0.7730556   | 0.002186882 |
| 17241030 |               | -0.743175498 | 0.002187415 |
| 17338403 | B430306N03Rik | -1.220794927 | 0.00219178  |
| 17445735 | Gnai1         | 1.010258657  | 0.00219178  |
| 17260579 | Hus1          | 1.390578685  | 0.00219178  |
| 17503825 | Mmp2          | -0.99099251  | 0.00219178  |
| 17423823 | Orc3          | 0.648368852  | 0.00219178  |
| 17244395 | Vezt          | 0.773240488  | 0.00219178  |
| 17500626 | Tusc3         | 0.635730854  | 0.002199638 |
| 17550378 |               | -1.011770742 | 0.002199638 |
| 17444640 | Cpsf4         | 0.846267972  | 0.002199855 |
| 17360355 | Smc3          | 0.793740728  | 0.002199855 |
| 17476535 | Dmkn          | 1.563858803  | 0.002203491 |
| 17258653 | Mettl23       | 0.683796809  | 0.002203491 |
| 17418934 | Tmem54        | 0.909376775  | 0.002203491 |

|          |               |              |             |
|----------|---------------|--------------|-------------|
| 17369580 | Lamc3         | -0.866517454 | 0.002204731 |
| 17393841 | 9430008C03Rik | -0.979602879 | 0.002204789 |
| 17345977 | Sgol1         | 0.783765983  | 0.002204789 |
| 17538834 |               | -1.395856554 | 0.002204789 |
| 17420911 | Atp13a2       | -0.921154815 | 0.002206509 |
| 17373110 | Kbtbd4        | 1.070590719  | 0.002206509 |
| 17222149 | Neurl3        | -1.003216488 | 0.002206599 |
| 17203215 |               | 1.809964257  | 0.002210429 |
| 17299750 | Tox4          | 0.966069309  | 0.002213974 |
| 17329640 | Atp13a3       | 0.826581639  | 0.002214986 |
| 17465671 | Chchd3        | 0.763241268  | 0.002214986 |
| 17484103 |               | 1.109518458  | 0.002226124 |
| 17274401 | 6030426L16Rik | 1.034653609  | 0.002231853 |
| 17405099 | Elf2          | 0.995306712  | 0.002231881 |
| 17497246 | Adam12        | -1.290303965 | 0.00223356  |
| 17370691 | Lypd6b        | 0.988310072  | 0.002236608 |
| 17347252 | Fam98a        | 1.146496896  | 0.002237768 |
| 17230879 | Kctd3         | 0.873343104  | 0.00223825  |
| 17435771 | Ept1          | 0.926938444  | 0.002249051 |
| 17384322 | Psm5          | 1.050435345  | 0.002249051 |
| 17296248 | Skiv2l2       | 0.896967934  | 0.002249051 |
| 17328978 | Cdc45         | 0.946819161  | 0.002256575 |
| 17461177 | Ppp4r2        | 0.642062254  | 0.002257091 |
| 17221071 | Sox17         | 1.408039818  | 0.002257091 |
| 17523494 | Kif15         | 0.872521976  | 0.002258949 |
| 17327236 | Clic6         | 1.659750898  | 0.002270021 |
| 17272780 | BC100451      | -0.761256543 | 0.002270863 |
| 17527934 | Kif23         | 1.052784614  | 0.002270863 |
| 17340397 | Nanp          | 1.516410734  | 0.002270863 |
| 17331479 |               | -0.727525707 | 0.002270863 |
| 17208249 |               | 1.159247127  | 0.002270863 |
| 17320322 | Mapk11        | 0.900850184  | 0.002276877 |
| 17236132 | Pwp1          | 0.62747644   | 0.00228388  |
| 17362696 | Tmem216       | 0.791534411  | 0.002284861 |
| 17428659 | Nasp          | 1.013648475  | 0.002285782 |
| 17388041 | Ptprj         | -0.771385025 | 0.00228642  |
| 17462149 | Cxcl12        | -0.990314793 | 0.00228773  |
| 17375641 | Dut           | 0.983890129  | 0.002296208 |
| 17349174 | Polr2d        | 1.090486185  | 0.002308102 |
| 17278880 | Mir496        | 1.029295737  | 0.002311715 |
| 17499723 | Gm21002       | -0.973143118 | 0.002322351 |
| 17550368 | Airn          | 0.746789403  | 0.002322417 |
| 17353462 | Brd8          | 0.922620962  | 0.002322417 |

|          |               |              |             |
|----------|---------------|--------------|-------------|
| 17333966 | Zfp760        | 1.065587617  | 0.002322417 |
| 17251303 | Pik3r5        | -1.112059295 | 0.002323612 |
| 17216087 | Ing5          | 1.079103037  | 0.002334161 |
| 17236739 | Ube2n         | 0.863150912  | 0.002336722 |
| 17237811 | Lrig3         | 0.805273613  | 0.002337217 |
| 17354428 |               | -0.998973003 | 0.002337217 |
| 17547783 | Gm7664        | 1.224158458  | 0.002343676 |
| 17405817 |               | -1.019307607 | 0.002343676 |
| 17268955 | Tns4          | 1.10024401   | 0.002352185 |
| 17409075 | Csf1          | -0.855452397 | 0.002355573 |
| 17496651 | Sephs2        | 1.26865803   | 0.002358828 |
| 17366872 |               | 1.016780054  | 0.002359009 |
| 17357552 |               | -0.696443566 | 0.00236143  |
| 17292541 | 9430083A17Rik | 0.881542169  | 0.002362309 |
| 17366336 |               | -1.309438854 | 0.002366283 |
| 17259438 | Gm11768       | -0.759358263 | 0.002366561 |
| 17507262 | Timm44        | 0.796079086  | 0.002366561 |
| 17354969 | Txn1          | 0.577051452  | 0.002366561 |
| 17282570 | Ltbp2         | -1.701951969 | 0.002370404 |
| 17221792 | Fam135a       | 0.807407757  | 0.002371991 |
| 17249965 | Mrpl22        | 0.807258426  | 0.002375283 |
| 17369925 | Eng           | -1.378534309 | 0.00237646  |
| 17452957 | Scarb1        | -0.84240958  | 0.002382014 |
| 17540323 | n-R5s3        | -1.679680073 | 0.002392607 |
| 17401749 | Wdr47         | 1.094708677  | 0.002392877 |
| 17507333 | Arglu1        | 0.810098715  | 0.002399958 |
| 17333050 | Fgfr1op       | 0.689856161  | 0.002407291 |
| 17452209 | Mapkapk5      | 0.667004932  | 0.002407291 |
| 17291374 | Mrs2          | 0.731912205  | 0.002407291 |
| 17212518 | Wdr75         | 0.791332074  | 0.002407291 |
| 17311689 | Wdyhv1        | 1.158397403  | 0.002407291 |
| 17326188 | G730013B05Rik | 0.941921455  | 0.002418757 |
| 17536339 | Zxdb          | 1.323161402  | 0.002418757 |
| 17268103 | Col1a1        | -0.936133395 | 0.002419833 |
| 17333946 | Zfp948        | 0.670171859  | 0.002423346 |
| 17530909 | Cyb561d2      | 0.694009505  | 0.002423772 |
| 17495308 |               | 1.353460567  | 0.002423772 |
| 17498695 | Pet100        | 0.737661154  | 0.002426594 |
| 17449631 |               | 1.271355857  | 0.002426594 |
| 17324684 |               | -0.93887565  | 0.002427336 |
| 17540736 | Gm14527       | -0.73993048  | 0.002433809 |
| 17221520 | Crisp4        | -0.832207849 | 0.002435611 |
| 17260089 | Ewsr1         | 0.783976446  | 0.002435611 |

|          |               |              |             |
|----------|---------------|--------------|-------------|
| 17532923 | Wdr45         | 0.991513514  | 0.002435611 |
| 17333076 |               | -1.243657526 | 0.00243794  |
| 17531238 | Arih2         | 0.742308033  | 0.002443882 |
| 17315519 | Hoxc6         | -0.928371919 | 0.002443882 |
| 17388599 | Ttc17         | 1.058689227  | 0.002443882 |
| 17305211 | Tspan14       | 1.016611381  | 0.002453565 |
| 17308734 | Gtf2f2        | 0.89175167   | 0.002461659 |
| 17466900 | 5730457N03Rik | -0.694772584 | 0.002466184 |
| 17374827 | 1700020I14Rik | 0.745484458  | 0.002467776 |
| 17310550 | Cdh12         | 1.635567242  | 0.002467776 |
| 17314729 | Dnajc22       | 1.11979739   | 0.002467776 |
| 17529496 | Snx14         | 0.625494903  | 0.002467776 |
| 17285223 |               | -0.948762185 | 0.002468872 |
| 17340629 | Mir692-1      | -0.829796983 | 0.002474744 |
| 17521143 | Wdr82         | 0.781587772  | 0.002474744 |
| 17480030 | Rab38         | 1.682820287  | 0.002476197 |
| 17282074 | Rab15         | 1.291722124  | 0.002483247 |
| 17265062 | 2810408A11Rik | 0.899660098  | 0.002487183 |
| 17275001 | Ahr           | -1.16250642  | 0.002487572 |
| 17355524 | 8030462N17Rik | 0.990430785  | 0.002491062 |
| 17320079 | Wnt7b         | 1.136450142  | 0.002491062 |
| 17283945 |               | 1.016094799  | 0.002491062 |
| 17283946 |               | 1.016094799  | 0.002491062 |
| 17446587 | Lmbr1         | 0.915469905  | 0.002492014 |
| 17547515 | Gm19894       | -0.697928147 | 0.002505854 |
| 17421187 | Pramef8       | 0.932964588  | 0.002505854 |
| 17348435 | Cables1       | -0.958910745 | 0.002515046 |
| 17300893 | Ift88         | 0.878223841  | 0.002515046 |
| 17381225 | Suv39h2       | 1.473341837  | 0.002515046 |
| 17249853 | Gm12236       | -0.841820544 | 0.002516444 |
| 17408315 | Hsd3b5        | -0.79821996  | 0.002516444 |
| 17484789 | Rassf7        | 0.662068303  | 0.002516444 |
| 17285819 | Hist1h2af     | -0.838544125 | 0.002519867 |
| 17489384 | Lsr           | 1.207234846  | 0.002519867 |
| 17308525 | Fndc3a        | 0.912626327  | 0.002520292 |
| 17307969 | Cdca2         | 0.886154787  | 0.002521484 |
| 17374421 | Mir1951       | -0.829926706 | 0.002521484 |
| 17500289 | Prosc         | 1.048454796  | 0.002521484 |
| 17315389 |               | 0.871167566  | 0.002535288 |
| 17275778 | Gm527         | 1.185200536  | 0.002535784 |
| 17539626 | Trappc2       | 0.692013397  | 0.002540887 |
| 17310827 | Fam173b       | 1.022779841  | 0.00254229  |
| 17388026 | Olf1270       | -0.663992035 | 0.002550369 |

|          |           |              |             |
|----------|-----------|--------------|-------------|
| 17411503 | Tgs1      | 0.990549293  | 0.002553519 |
| 17412539 | Rragd     | 1.036596153  | 0.002558205 |
| 17276255 |           | 0.721574118  | 0.002562646 |
| 17318665 | Foxh1     | -1.283636259 | 0.002567516 |
| 17501688 | Zfp964    | 1.131037212  | 0.002567516 |
| 17284039 | Cinp      | 0.865408272  | 0.002567714 |
| 17291222 | Hist1h3c  | 1.362345109  | 0.002567714 |
| 17364954 | Cox15     | 1.167193837  | 0.002567885 |
| 17547749 | Gm6478    | 0.966637824  | 0.002570841 |
| 17463718 | Cdkn1b    | 0.844925349  | 0.002575402 |
| 17504112 | Arl2bp    | 0.748647886  | 0.002575761 |
| 17543850 | Mir672    | -0.694517605 | 0.002575761 |
| 17367071 | Stam      | 0.851767895  | 0.002575761 |
| 17255558 | Hoxb9     | -0.657526974 | 0.002578318 |
| 17548354 | Lph       | 0.923191339  | 0.002578849 |
| 17359020 | Kif11     | 0.798907096  | 0.002579747 |
| 17298041 | Arhgef3   | 0.884902411  | 0.002580698 |
| 17240379 | Cdc40     | 1.057440641  | 0.002580698 |
| 17511073 | Mir181d   | -1.195114587 | 0.002580698 |
| 17384717 | Nr6a1     | 0.825278757  | 0.002580698 |
| 17281575 | Mettl21d  | 0.799560081  | 0.002584203 |
| 17226572 | Dars      | 0.60092465   | 0.00258726  |
| 17226062 | Vps4b     | 0.638606439  | 0.00258726  |
| 17480205 | Rab30     | 0.848692804  | 0.00258784  |
| 17265727 | Emc6      | 0.671083926  | 0.002589011 |
| 17202489 |           | -1.188229715 | 0.00259096  |
| 17501989 | Lrrc25    | -1.021484506 | 0.002591886 |
| 17430861 | Sesn2     | 1.00287027   | 0.002592419 |
| 17407496 | Crct1     | 1.172120141  | 0.002593666 |
| 17520171 | Bcl2a1b   | -1.518923649 | 0.002605574 |
| 17281108 | Eapp      | 0.812180816  | 0.002606448 |
| 17517323 | Npat      | 0.733615279  | 0.002608702 |
| 17332386 | Psmg1     | 0.937893592  | 0.002611021 |
| 17366880 | Mir466b-3 | 1.926236395  | 0.002612383 |
| 17267329 | Vmp1      | 0.720466969  | 0.002612383 |
| 17280483 | Acp1      | 0.624450558  | 0.002624333 |
| 17224738 | Ap1s3     | 0.960699342  | 0.002627849 |
| 17288309 | Zfp455    | 1.41174379   | 0.002652342 |
| 17372377 | Ppp1r1c   | 1.076832549  | 0.002655012 |
| 17207613 |           | 1.596940722  | 0.002655012 |
| 17494664 | GM8989    | -1.063992217 | 0.002655831 |
| 17378942 | Ppp1r16b  | 1.486512144  | 0.002655831 |
| 17332583 | Ripk4     | 0.759997264  | 0.002655831 |



|          |               |              |             |
|----------|---------------|--------------|-------------|
| 17491178 | Saal1         | 1.006895188  | 0.002655831 |
| 17330947 | Zpld1         | 0.934995488  | 0.002655831 |
| 17278842 | Mir300        | 1.972958771  | 0.002656908 |
| 17460506 | Gfpt1         | 0.950032402  | 0.002657364 |
| 17517390 | ldh3a         | 0.941063088  | 0.002657364 |
| 17325489 | Rabl3         | 1.220536956  | 0.002657364 |
| 17522235 | Cdc25a        | 1.158258555  | 0.002661031 |
| 17363320 | Gcnt1         | 0.928125285  | 0.002661031 |
| 17256618 | Vps25         | 0.805692863  | 0.002661031 |
| 17202595 |               | -1.104467334 | 0.002661031 |
| 17457807 | Ephb6         | -0.693860333 | 0.002661465 |
| 17344132 | Hspa1a        | 0.978359526  | 0.002663452 |
| 17454995 | Tmem130       | 1.018966772  | 0.002663452 |
| 17327594 | Zfp597        | 0.900718455  | 0.002664112 |
| 17512833 | Ist1          | 0.613873531  | 0.00266796  |
| 17324249 | 1300002E11Rik | 0.746469261  | 0.002675415 |
| 17275042 | Sostdc1       | 1.427671017  | 0.002676051 |
| 17411732 | 2610301B20Rik | 0.70240206   | 0.002679368 |
| 17275706 | Pnn           | 0.868068561  | 0.002679368 |
| 17343371 | Akap8         | 1.000423963  | 0.002688216 |
| 17203211 |               | 1.719453211  | 0.002688216 |
| 17508353 | Tacc1         | -0.820649075 | 0.002689972 |
| 17468633 | Aplf          | 0.796256913  | 0.002691748 |
| 17276893 | Srsf5         | 0.631449667  | 0.002696766 |
| 17466101 | Slc37a3       | 1.10454808   | 0.002700023 |
| 17233669 | Pcbd1         | 0.975836003  | 0.002703116 |
| 17366898 |               | 1.779513441  | 0.002703116 |
| 17355441 |               | -0.80421838  | 0.002713978 |
| 17480358 | Ints4         | 0.724256918  | 0.002714076 |
| 17420951 | Mfap2         | -1.293251217 | 0.002715299 |
| 17257663 | Psmc12        | 0.629066132  | 0.002715299 |
| 17216942 | AA986860      | 0.994246743  | 0.002722543 |
| 17280888 | Lrrn3         | 2.069978257  | 0.002722543 |
| 17437087 | Tmem128       | 0.80649279   | 0.002722543 |
| 17471201 | Rad51ap1      | 0.757432024  | 0.002724431 |
| 17418279 | Sf3a3         | 0.735747487  | 0.002726574 |
| 17525060 | Tbx20         | -1.16709443  | 0.002728992 |
| 17359825 | Tlx1          | -0.697117239 | 0.002728992 |
| 17416481 | Tmem48        | 0.927089902  | 0.002728992 |
| 17478459 | Slc17a6       | 1.73563381   | 0.00273278  |
| 17391247 | Ciao1         | 0.608004162  | 0.002742919 |
| 17470597 | Slc2a3        | 1.293013994  | 0.002742919 |
| 17276302 | Prkch         | 1.111529535  | 0.002743307 |

|          |               |              |             |
|----------|---------------|--------------|-------------|
| 17240239 | Fam229b       | 0.812984538  | 0.002744776 |
| 17243020 |               | -0.934145038 | 0.002744902 |
| 17455507 | Hsph1         | 0.990019912  | 0.002746954 |
| 17300075 | Trav13-4-dv7  | -1.886365222 | 0.002746954 |
| 17546212 | G530011O06Rik | -1.377460436 | 0.002755556 |
| 17239077 | Ginm1         | 0.688616948  | 0.002755559 |
| 17293650 | Slc35d2       | 1.181608029  | 0.002755559 |
| 17303677 | Gm3173        | 0.909924984  | 0.002758842 |
| 17257835 | Amz2          | 0.75926008   | 0.002765462 |
| 17412272 | Ndufaf4       | 0.697192736  | 0.002769931 |
| 17287726 | Caml          | 0.89675597   | 0.002777601 |
| 17290565 | Mtr           | 1.013231315  | 0.002777601 |
| 17413553 | Zcchc7        | 0.698354246  | 0.002777601 |
| 17252404 |               | 0.745051459  | 0.002777601 |
| 17257056 |               | 0.76905652   | 0.002777601 |
| 17412857 |               | -0.729441583 | 0.002777601 |
| 17400449 | Anp32e        | 0.905760737  | 0.00277874  |
| 17497649 | Olfr532       | -0.985196703 | 0.00277874  |
| 17484107 |               | 0.738904585  | 0.002778885 |
| 17420091 | Hnrnpr        | 0.886278406  | 0.002800398 |
| 17422449 | Pank4         | 0.706067714  | 0.002800398 |
| 17508336 | Plekha2       | -0.815056239 | 0.002803544 |
| 17442071 | Vps29         | 0.591660492  | 0.002803544 |
| 17382737 | Fcna          | -0.751103812 | 0.002804261 |
| 17311179 | Fzd6          | 0.707944911  | 0.002804261 |
| 17530243 | Trf           | -1.12497345  | 0.002804261 |
| 17319545 | Polr3h        | 0.900122143  | 0.002805395 |
| 17362953 | Ms4a7         | -2.03613809  | 0.002809116 |
| 17502342 | Zfp617        | 0.714090039  | 0.002809116 |
| 17333323 | Tcp1          | 0.625355841  | 0.002811754 |
| 17288641 | Ccdc127       | 1.068627457  | 0.002815358 |
| 17275811 | Prpf39        | 0.972037021  | 0.002815358 |
| 17407341 | Chtop         | 0.756528122  | 0.002816391 |
| 17397632 | Alg5          | 0.849941881  | 0.002819979 |
| 17547732 | Exoc2         | 1.694588486  | 0.002819979 |
| 17292775 | Hk3           | -1.300520452 | 0.002819979 |
| 17262589 |               | 1.761367826  | 0.002822988 |
| 17410043 | Mettl14       | 0.758377653  | 0.002825462 |
| 17239227 | Rab32         | -0.838184299 | 0.002825462 |
| 17306289 | Mettl3        | 0.772664182  | 0.002827121 |
| 17401987 | Dph5          | 0.854684768  | 0.002830765 |
| 17523416 | Abhd5         | 1.042507346  | 0.002835115 |
| 17234264 | Gnaz          | 0.987393708  | 0.002840108 |

|          |               |              |             |
|----------|---------------|--------------|-------------|
| 17351840 |               | 0.917208645  | 0.002840108 |
| 17431612 | C1qc          | -1.791141223 | 0.002856362 |
| 17304273 | Ccdc66        | 0.719932523  | 0.002856362 |
| 17228906 | Dnm3          | 0.690494561  | 0.002868422 |
| 17440086 | Rpap2         | 0.676815505  | 0.002868619 |
| 17218149 | Ivns1abp      | 0.936946127  | 0.002870172 |
| 17550452 | Snhg3         | 0.820654241  | 0.002870172 |
| 17235954 | A230046K03Rik | 0.700075639  | 0.002877398 |
| 17513446 | Hsd1l         | 0.990855322  | 0.002889195 |
| 17274350 | 5730507C01Rik | 0.57560937   | 0.002890126 |
| 17415231 |               | -0.763373523 | 0.002890126 |
| 17206487 |               | 0.976091395  | 0.002890126 |
| 17208427 |               | 2.347279278  | 0.002890126 |
| 17314900 | Cox14         | 0.92730656   | 0.002903415 |
| 17252403 |               | 0.721787533  | 0.002908893 |
| 17502583 | Mcm5          | 1.416329956  | 0.002908997 |
| 17237026 | Mir3059       | -0.958129337 | 0.002909004 |
| 17372904 | Olfr1183      | -1.080949391 | 0.002909004 |
| 17405478 | P2ry13        | -1.26763002  | 0.002909004 |
| 17308472 |               | 1.372894686  | 0.002909004 |
| 17348451 |               | 0.817710909  | 0.002909004 |
| 17225785 | Dtymk         | 0.784010813  | 0.002921276 |
| 17481725 | Zfp143        | 0.649186805  | 0.002924713 |
| 17200103 |               | 1.911901729  | 0.002924713 |
| 17321148 | Senp1         | 0.676967568  | 0.002925248 |
| 17440022 | n-R5s173      | -1.78080354  | 0.00292705  |
| 17206931 |               | 1.154661389  | 0.00292705  |
| 17410323 | Gar1          | 0.952650854  | 0.002928441 |
| 17391376 | Bub1          | 0.756632235  | 0.002930873 |
| 17259748 | Drg1          | 0.674818504  | 0.002930873 |
| 17306577 | Myh7          | 1.678220947  | 0.002930873 |
| 17393131 | Snta1         | -0.947329974 | 0.002932243 |
| 17500188 | Lsm1          | 0.664946956  | 0.00293357  |
| 17511196 | Gcdh          | 0.847536207  | 0.002935534 |
| 17450098 | Lin54         | 0.937503614  | 0.002935534 |
| 17261494 | Nprl3         | 0.568426367  | 0.002935789 |
| 17363980 | Minpp1        | 0.976876358  | 0.002938186 |
| 17241534 | Hnrnp3        | 0.805400083  | 0.002940083 |
| 17462796 | Clec4d        | -1.693792181 | 0.002952018 |
| 17366804 |               | 1.223101466  | 0.002952018 |
| 17366840 |               | 1.223101466  | 0.002952018 |
| 17205043 |               | -0.736070394 | 0.002952018 |
| 17209233 |               | -0.736070394 | 0.002952018 |

|          |               |              |             |
|----------|---------------|--------------|-------------|
| 17547265 |               | -0.884390567 | 0.002957096 |
| 17382822 | Nacc2         | -0.631662152 | 0.002966502 |
| 17520687 | Cep70         | 1.061534188  | 0.002967737 |
| 17431181 | Sh3bgrl3      | -0.969968801 | 0.002977725 |
| 17457942 | Zyx           | -0.661301094 | 0.002977725 |
| 17534960 | Fhl1          | 0.599142928  | 0.002982022 |
| 17445381 | Gtpbp10       | 1.171350434  | 0.002989084 |
| 17512084 |               | 1.538341879  | 0.002989428 |
| 17357126 | Snhg1         | 0.564645056  | 0.002996431 |
| 17331148 | Cmss1         | 0.907319556  | 0.003001941 |
| 17296602 | D830030K20Rik | 1.031182302  | 0.003001941 |
| 17508161 | Golga7        | 0.659312796  | 0.003001941 |
| 17513289 | Maf           | -1.208271958 | 0.003001941 |
| 17459151 |               | -2.547014805 | 0.003003011 |
| 17469967 | Plxnd1        | -1.101909916 | 0.003009759 |
| 17468527 |               | 0.72539401   | 0.003009766 |
| 17237647 | Tmbim4        | 0.745746     | 0.003010272 |
| 17385879 | Cobll1        | 0.968421046  | 0.003010726 |
| 17376618 | Chgb          | 1.206407429  | 0.003013371 |
| 17463298 | Gm16303       | -2.277488962 | 0.003013371 |
| 17304294 | Gm2670        | -0.875587454 | 0.003013371 |
| 17261840 | Hmmr          | 0.904335707  | 0.003013371 |
| 17217596 | Lmod1         | -0.707371339 | 0.003013371 |
| 17323371 | Mapk1         | 0.540928454  | 0.003013371 |
| 17455274 | Mtif3         | 0.965148208  | 0.003013371 |
| 17366597 | Usp6nl        | 0.688173614  | 0.003013371 |
| 17257060 |               | 0.671297273  | 0.003013371 |
| 17248083 |               | 1.159703439  | 0.003013371 |
| 17220059 | Cdc42bpa      | -0.986184764 | 0.003014862 |
| 17228563 | Tor3a         | 0.644232772  | 0.003015474 |
| 17217216 | Rbbp5         | 0.9251559    | 0.003016826 |
| 17534899 | Ncrna00086    | 1.15187571   | 0.003018673 |
| 17378310 |               | 1.497732495  | 0.003018673 |
| 17360084 | As3mt         | 0.96372674   | 0.003033756 |
| 17296943 | Gm8281        | 1.317477224  | 0.003034262 |
| 17261622 | Kcnip1        | 0.946232931  | 0.003035669 |
| 17203921 |               | 0.905604931  | 0.003038779 |
| 17493556 | Acer3         | 0.806865322  | 0.00305093  |
| 17384787 | Scai          | 1.053964916  | 0.003061621 |
| 17391317 | Zfp661        | 0.692403092  | 0.003067081 |
| 17201625 |               | -1.403322212 | 0.003067081 |
| 17227348 | Nav1          | -1.038440421 | 0.003068246 |
| 17494005 | Rnf121        | 0.66511425   | 0.003075249 |

|          |               |              |             |
|----------|---------------|--------------|-------------|
| 17525353 | Tirap         | 0.953688737  | 0.003075249 |
| 17233331 | Asf1a         | 0.835133156  | 0.003076637 |
| 17301757 | Reep4         | 0.79736723   | 0.003086646 |
| 17452540 | Morn3         | -0.689980555 | 0.00308724  |
| 17419500 | Ahdc1         | -0.608636939 | 0.003088264 |
| 17226622 | Cd55          | 0.935985502  | 0.003088264 |
| 17544160 |               | -0.816860136 | 0.003088264 |
| 17205487 |               | 0.925161032  | 0.003088264 |
| 17365164 |               | 0.91119972   | 0.003088264 |
| 17409406 | Stxbp3a       | 0.981641385  | 0.003092053 |
| 17281280 | Mbip          | 0.628045759  | 0.003101635 |
| 17497131 | Mettl10       | 0.949907846  | 0.003101635 |
| 17426956 | Haus6         | 0.939314734  | 0.003102174 |
| 17270103 |               | -0.911657486 | 0.003102174 |
| 17419773 | Stmn1         | 0.714353626  | 0.003112674 |
| 17296849 | Gm3760        | 1.014511691  | 0.00311537  |
| 17545381 | Gnl3l         | 0.866483147  | 0.003132852 |
| 17339706 | Ttc27         | 0.856235249  | 0.003134401 |
| 17407721 | Gabpb2        | 0.828396368  | 0.003138575 |
| 17304757 | Mettl6        | 0.67043974   | 0.003140706 |
| 17355962 | Suv420h1      | 0.792848813  | 0.003140706 |
| 17323138 | Abcc1         | -0.601634216 | 0.003148703 |
| 17354299 | Sema6a        | 1.093225503  | 0.003152385 |
| 17509274 | Ing2          | 1.042696149  | 0.003153649 |
| 17521417 | Tusc2         | 0.748543796  | 0.003154239 |
| 17466599 | Rarres2       | -0.773747037 | 0.003158087 |
| 17261650 | Dock2         | -1.251285908 | 0.003161394 |
| 17536278 | AU015836      | 2.226136677  | 0.003162744 |
| 17527433 | C230081A13Rik | -0.889552272 | 0.003162744 |
| 17390778 | Duoxa1        | 0.958737128  | 0.003172113 |
| 17407505 | Gm5278        | -0.878058128 | 0.003176273 |
| 17547817 | 1700054O19Rik | -0.830027347 | 0.003176857 |
| 17323066 |               | 1.318290603  | 0.003177587 |
| 17435920 | Emilin1       | -0.974257085 | 0.00318169  |
| 17479575 | Prc1          | 1.183437588  | 0.003182823 |
| 17266372 | Snord42b      | 0.961070952  | 0.003182823 |
| 17425377 |               | -0.842939218 | 0.003182823 |
| 17248726 |               | -0.94539841  | 0.003187239 |
| 17399904 | Ywhaz         | 0.647454883  | 0.003189234 |
| 17439029 | Areg          | 1.140427601  | 0.003191762 |
| 17527139 | Cul5          | 0.806031924  | 0.003191762 |
| 17324451 | Lpp           | -0.784933314 | 0.003191762 |
| 17376783 | Lamp5         | 0.933861609  | 0.003196724 |

|          |               |              |             |
|----------|---------------|--------------|-------------|
| 17440620 | Pitpnb        | 0.654351057  | 0.003196724 |
| 17430192 | Zmym1         | 1.11818021   | 0.003198111 |
| 17514033 | Abcb10        | 1.195058792  | 0.00320605  |
| 17411751 | Trp53inp1     | 0.731518476  | 0.00320605  |
| 17468521 |               | -1.043176287 | 0.003216522 |
| 17367576 | Acbd5         | 0.966900029  | 0.003217019 |
| 17303368 | Gm10338       | 1.408901347  | 0.003217019 |
| 17395060 | Gm14453       | -0.730417449 | 0.003217019 |
| 17330306 | Gtf2e1        | 0.979802379  | 0.003217019 |
| 17340244 | Ttc7          | -0.700494043 | 0.003217019 |
| 17549606 |               | -1.007795553 | 0.003217019 |
| 17543104 | Mir1906-1     | 1.361532709  | 0.003218195 |
| 17405047 | 2610316D01Rik | 0.701230891  | 0.003229555 |
| 17422160 | Rpl22         | 0.637277438  | 0.003229555 |
| 17391883 | Cenpb         | -0.701921255 | 0.003233683 |
| 17400121 | Gm15234       | 1.203221518  | 0.003233683 |
| 17549150 |               | 0.90470518   | 0.003233683 |
| 17268977 | Smarce1       | 0.825385246  | 0.003236464 |
| 17238636 |               | -0.705005575 | 0.003243893 |
| 17201635 |               | -1.163789623 | 0.003246409 |
| 17280810 | Arl4a         | 0.715890263  | 0.00325668  |
| 17366816 |               | 1.152642096  | 0.00325668  |
| 17366852 |               | 1.152642096  | 0.00325668  |
| 17432865 | Clcn6         | 0.898714809  | 0.003269839 |
| 17308470 |               | 0.750289953  | 0.00327204  |
| 17548638 | Fam58b        | 1.035375189  | 0.003276471 |
| 17396035 | Zbtb10        | 1.17515115   | 0.003276471 |
| 17200419 |               | -1.344422306 | 0.003288071 |
| 17366718 |               | 1.298086678  | 0.00329007  |
| 17296731 | Gm5796        | 0.627769072  | 0.003291077 |
| 17236018 | Polr3b        | 0.663734979  | 0.003291077 |
| 17241849 | Susd2         | 1.316143012  | 0.003291077 |
| 17411594 | Ubxn2b        | 0.85651817   | 0.003291077 |
| 17480489 |               | -1.69295328  | 0.003291077 |
| 17315187 | 9430023L20Rik | 0.733786629  | 0.003291184 |
| 17538060 | Mum1l1        | 1.234402392  | 0.003291184 |
| 17447128 | Slbp          | 0.833750048  | 0.003291184 |
| 17349544 | Snhg4         | 0.905558121  | 0.003291184 |
| 17290729 | Ggps1         | 0.974260107  | 0.003294782 |
| 17501609 | Ints10        | 0.712626402  | 0.003295106 |
| 17203089 |               | 0.798848382  | 0.003295587 |
| 17220533 | Bpnt1         | 1.017982672  | 0.003297074 |
| 17475208 |               | -0.871666239 | 0.003297074 |

|          |          |              |             |
|----------|----------|--------------|-------------|
| 17208133 |          | -1.182441639 | 0.003297074 |
| 17537853 | Bhlhb9   | 0.835117221  | 0.003301222 |
| 17492729 | Sec11a   | 0.588046486  | 0.003314222 |
| 17285998 | BC005537 | -0.656289128 | 0.003317725 |
| 17372392 | Dnajc10  | 0.579373294  | 0.003317725 |
| 17301283 | Prss52   | -0.642663114 | 0.003317725 |
| 17334241 | Rnps1    | 0.661432068  | 0.003317725 |
| 17281826 | Rtn1     | 0.756455024  | 0.003317725 |
| 17454216 | Zfp113   | 0.740427561  | 0.003317725 |
| 17364367 | Noc3l    | 0.916125153  | 0.003327788 |
| 17209795 |          | -1.675573307 | 0.003327788 |
| 17517848 | Stra6    | 1.849103595  | 0.003335702 |
| 17354290 | Atg12    | 0.763387253  | 0.003339717 |
| 17324420 | St6gal1  | -1.099109857 | 0.003343153 |
| 17473580 | Zfp667   | 1.25389303   | 0.003343153 |
| 17472210 | Arhgdib  | -0.794362772 | 0.0033468   |
| 17411392 | Fpgt     | 0.935036098  | 0.0033468   |
| 17382169 | Mastl    | 0.783550261  | 0.0033468   |
| 17551091 |          | -4.043030468 | 0.0033468   |
| 17468690 | Cnbp     | 0.547029604  | 0.003348424 |
| 17504321 | Gins3    | 0.987672714  | 0.003348424 |
| 17433898 | Mxra8    | -1.119231503 | 0.003348424 |
| 17226155 | Tsn      | 0.924249891  | 0.003348424 |
| 17348957 | Zfp35    | 1.008307625  | 0.003348424 |
| 17202955 |          | 1.306475765  | 0.003348424 |
| 17338521 | Plcl2    | 0.633843738  | 0.003349141 |
| 17437937 | Slc30a9  | 0.629964684  | 0.00335566  |
| 17274369 | Gm5784   | 0.665393821  | 0.003360562 |
| 17336114 | Myo1f    | -1.361011275 | 0.003365582 |
| 17326370 | Tomm70a  | 0.587898884  | 0.003368413 |
| 17353747 | Cd14     | -1.052986327 | 0.003369028 |
| 17368646 | Olfm1    | 1.225745018  | 0.003369031 |
| 17551103 |          | -3.176691098 | 0.003370186 |
| 17551099 |          | -2.345768751 | 0.003371181 |
| 17548646 | Arl5a    | -0.714428149 | 0.003371251 |
| 17436999 | Crmp1    | 1.654151524  | 0.003383384 |
| 17370302 | Gm13431  | -0.797239142 | 0.003391486 |
| 17474974 | Plaur    | 1.378240501  | 0.003391486 |
| 17224476 | Abcb6    | 0.697300666  | 0.003396556 |
| 17269845 | Becn1    | 0.807820126  | 0.003397766 |
| 17510836 | Usp38    | 0.977469277  | 0.003397766 |
| 17449635 |          | 0.9032689    | 0.003397766 |
| 17484102 |          | 0.661781911  | 0.003397766 |

|          |               |              |             |
|----------|---------------|--------------|-------------|
| 17223069 | Stk17b        | 0.647622165  | 0.003404141 |
| 17315385 | Pfdn5         | 0.610802291  | 0.003410975 |
| 17542213 | Magea10       | -0.647264562 | 0.003414233 |
| 17252113 | Mink1         | -0.600203426 | 0.003414233 |
| 17410410 | Sgms2         | 0.815557597  | 0.003414233 |
| 17486152 | Zfp772        | 0.82719163   | 0.003414233 |
| 17504727 | Elmo3         | 0.771308464  | 0.003416289 |
| 17211090 | Cspp1         | 0.864254846  | 0.003417731 |
| 17311104 | Grhl2         | 0.804545098  | 0.003417731 |
| 17495301 |               | 0.70073011   | 0.003423295 |
| 17224977 | Dner          | 1.427881691  | 0.003427038 |
| 17233888 | Herc4         | 0.890589352  | 0.00344242  |
| 17241510 | Snord98       | 1.296723742  | 0.00344242  |
| 17290855 | Stard3nl      | -0.682513511 | 0.00344242  |
| 17281946 | Ppp2r5e       | 0.724771607  | 0.003446533 |
| 17425425 | lkbkap        | 0.923942521  | 0.003459142 |
| 17234136 | Slc16a9       | 0.811131727  | 0.003459802 |
| 17505050 | 1810019D21Rik | 0.611246423  | 0.003461717 |
| 17352884 | Cdh2          | -0.752062641 | 0.003461717 |
| 17295718 | Cdk7          | 0.607170667  | 0.003461717 |
| 17249409 | 9430098F02Rik | 0.588177642  | 0.003470095 |
| 17238594 | Cd63          | 0.645984141  | 0.003470095 |
| 17504399 | Cdh5          | 1.968588207  | 0.003470095 |
| 17423915 | Mob3b         | 1.232294567  | 0.003470095 |
| 17265976 | Serpinf2      | -0.839546036 | 0.003470095 |
| 17238856 |               | -0.983656219 | 0.003470095 |
| 17338562 | Rab5a         | 0.664646447  | 0.003470712 |
| 17225413 | Col6a3        | -0.943473968 | 0.003471618 |
| 17452689 | Rsrc2         | 0.885266654  | 0.003471618 |
| 17261417 | Chac2         | 0.869715239  | 0.003473377 |
| 17218653 | Gas5          | 0.725471651  | 0.003474127 |
| 17245488 | Tbk1          | 0.890632359  | 0.003474127 |
| 17494185 | Olfr616       | -0.763689093 | 0.003476554 |
| 17284166 | 5033406O09Rik | -0.604544736 | 0.003479302 |
| 17227138 | Tmem183a      | 0.67160122   | 0.003479302 |
| 17319806 | Arfgap3       | 0.937048636  | 0.003479809 |
| 17521652 | Nicn1         | 0.743278205  | 0.003479809 |
| 17442898 | Mrps17        | 0.67087021   | 0.003487266 |
| 17403490 | Mcoln2        | -0.657043752 | 0.003490739 |
| 17438438 | Srp72         | 0.570585189  | 0.003492574 |
| 17397827 | Med12l        | 0.668458724  | 0.003494089 |
| 17318143 | Top1mt        | 1.221790309  | 0.0034947   |
| 17448577 | Gabra2        | 1.139848113  | 0.003496107 |



|          |               |              |             |
|----------|---------------|--------------|-------------|
| 17311652 | Wdr67         | 1.1005367    | 0.003496107 |
| 17423291 | Esrp1         | 1.477261348  | 0.003496597 |
| 17508593 | Mak16         | 0.840447672  | 0.00350905  |
| 17409328 | Sars          | 0.839141947  | 0.003509234 |
| 17405397 | Pfn2          | 0.991213229  | 0.003512577 |
| 17302483 | Cln5          | 0.724299354  | 0.003523598 |
| 17211131 | Prex2         | -1.340482763 | 0.00352518  |
| 17320783 | Pus7l         | 0.806957747  | 0.00352518  |
| 17487855 | Pou2f2        | -0.755765333 | 0.003527827 |
| 17265733 | Ctns          | 0.937854512  | 0.003532075 |
| 17349223 | lws1          | 0.850981201  | 0.003532075 |
| 17326801 | Jam2          | 1.154614761  | 0.003532075 |
| 17371495 | Klhl23        | 0.81416433   | 0.003532075 |
| 17344120 | Snord52       | 0.854135665  | 0.003532075 |
| 17354810 | Afap1l1       | 1.218551988  | 0.003537149 |
| 17438361 | Cep135        | 1.025275953  | 0.003537149 |
| 17365160 | Mrpl43        | 0.676716169  | 0.003537149 |
| 17400023 | Them4         | 0.829154392  | 0.003543036 |
| 17238852 |               | -0.939770991 | 0.003545657 |
| 17502754 | Otud4         | 0.747072277  | 0.00354594  |
| 17203355 |               | 1.645856311  | 0.003551357 |
| 17252405 |               | 0.585573199  | 0.003553603 |
| 17427462 | Tm2d1         | 0.876392501  | 0.003555139 |
| 17429837 | 1700021L23Rik | -0.686243728 | 0.003556427 |
| 17541417 | Aifm1         | 0.66829924   | 0.003556427 |
| 17357183 | Nxf1          | 1.008684529  | 0.003556427 |
| 17260839 | Actr2         | 0.590173301  | 0.003558663 |
| 17375341 | Ctdspl2       | 0.693922338  | 0.003558663 |
| 17229658 | Fcer1g        | -1.269952809 | 0.003558663 |
| 17491564 |               | 1.03483736   | 0.003559251 |
| 17548504 | Gm10244       | 0.885162235  | 0.003561779 |
| 17528296 | Trip4         | 0.607272552  | 0.003589845 |
| 17279959 | 1700034J04Rik | -0.595465577 | 0.003590947 |
| 17341705 |               | 1.208463926  | 0.003590947 |
| 17323532 | P2rx6         | -0.644080765 | 0.003593737 |
| 17207277 |               | 1.902012092  | 0.003595618 |
| 17393620 | Dsn1          | 0.9765209    | 0.00361197  |
| 17533553 | Phf16         | 0.886103722  | 0.00361197  |
| 17468706 |               | -0.540649231 | 0.00361197  |
| 17539064 | Acot9         | 0.757174852  | 0.003618777 |
| 17321907 | Krt75         | 1.276398799  | 0.003621084 |
| 17354992 | 1700091E21Rik | 0.734412089  | 0.003625523 |
| 17290217 | BC016423      | 0.744191244  | 0.003627898 |

|          |               |              |             |
|----------|---------------|--------------|-------------|
| 17311272 | Zfpm2         | -1.087350284 | 0.003644787 |
| 17366792 |               | 1.37473719   | 0.003644787 |
| 17225829 | 1700063A18Rik | -0.610909121 | 0.003645006 |
| 17466397 | Epha1         | 0.973628039  | 0.003645006 |
| 17320907 | Slc38a1       | 0.719439947  | 0.003645006 |
| 17206171 |               | -1.497519933 | 0.003645006 |
| 17294959 | Cmya5         | -0.824435591 | 0.003660082 |
| 17277801 | Spata7        | 0.776674226  | 0.003663999 |
| 17419287 | Laptm5        | -1.10747125  | 0.003664854 |
| 17250638 | Specc1        | -0.791153639 | 0.003669968 |
| 17267393 | Dhx40         | 0.666848547  | 0.003673075 |
| 17353581 | Lrrtm2        | 0.73039838   | 0.003674325 |
| 17333707 | Mirlet7e      | -0.798573038 | 0.003694128 |
| 17253478 | Rab34         | -0.720017353 | 0.003694705 |
| 17525524 | Stt3a         | 0.596873483  | 0.003700627 |
| 17538833 |               | -1.062426244 | 0.003700627 |
| 17485815 | Syt5          | 0.981778199  | 0.003701874 |
| 17517151 | Alg9          | 0.798634     | 0.003702626 |
| 17450741 | Atp5k         | -0.608304247 | 0.003702626 |
| 17460185 | Dysf          | -0.741536715 | 0.003702626 |
| 17322429 | Ppp1r1a       | 0.869706481  | 0.003702626 |
| 17308476 |               | 0.882961553  | 0.003702626 |
| 17291576 | Exoc2         | 0.538326835  | 0.003705466 |
| 17333729 | Mir125a       | -0.998689316 | 0.003705466 |
| 17393868 | Mafb          | -1.09639658  | 0.003714484 |
| 17257051 | Nmt1          | 0.581672745  | 0.00371602  |
| 17549062 |               | 0.928728942  | 0.003717053 |
| 17299101 | Ang5          | -0.865840542 | 0.00372438  |
| 17318422 | Gm10872       | -0.580240659 | 0.00372438  |
| 17444653 | Zkscan5       | 0.588721883  | 0.003725261 |
| 17389051 | Elp4          | 0.690713604  | 0.003730755 |
| 17321046 | Hdac7         | -0.820127508 | 0.003730755 |
| 17292712 | Nop16         | 0.766570897  | 0.003730755 |
| 17438101 | Ociad1        | 0.582267201  | 0.003733595 |
| 17365444 | Pcgf6         | 0.91649527   | 0.003733595 |
| 17398152 | Gfm1          | 0.830644668  | 0.003736162 |
| 17522369 | Ngp           | -0.855587055 | 0.003737735 |
| 17384484 | Ggta1         | 0.744210816  | 0.003737933 |
| 17209023 |               | 1.043343775  | 0.003753269 |
| 17292654 | Sptlc1        | 0.618679028  | 0.003759611 |
| 17432287 | Ddi2          | 0.86919315   | 0.003768697 |
| 17511296 | Wdr83         | 0.81033152   | 0.003771617 |
| 17260775 | Pno1          | 0.703919116  | 0.003774176 |

|          |              |              |             |
|----------|--------------|--------------|-------------|
| 17354132 | Jakmip2      | 1.173716759  | 0.003774318 |
| 17364187 |              | -0.988095767 | 0.003774318 |
| 17459591 | St3gal5      | -0.730995414 | 0.003775126 |
| 17370420 | Crb2         | -1.194928342 | 0.003780521 |
| 17340232 | Cript        | 0.720106984  | 0.003780521 |
| 17483532 | Kat8         | 0.773843245  | 0.00378076  |
| 17530322 | Uba5         | 0.624330407  | 0.003782651 |
| 17374283 | Katnbl1      | 0.869761865  | 0.003788899 |
| 17274841 | Cog5         | 0.723246864  | 0.003793734 |
| 17493405 |              | -1.03318801  | 0.003793734 |
| 17210607 |              | -0.859766668 | 0.003797317 |
| 17365243 | Npm3         | 0.696809362  | 0.003805423 |
| 17454226 | Mcm7         | 0.805928824  | 0.003806546 |
| 17500275 | Erlin2       | 0.644268959  | 0.003816337 |
| 17392375 | Snx5         | 0.553178032  | 0.003816337 |
| 17236091 | Al597468     | 0.764349206  | 0.003818418 |
| 17449008 | Aasdh        | 0.832711856  | 0.003822363 |
| 17516068 | Msantd2      | 0.651905292  | 0.003822363 |
| 17362616 | Myrf         | -1.640585299 | 0.003825203 |
| 17467823 | Kcmf1        | 0.529064685  | 0.003826045 |
| 17291854 | Rpp40        | 0.759957014  | 0.003833617 |
| 17302213 | Mtrf1        | 0.605657703  | 0.003836791 |
| 17357597 | Slc15a3      | -1.344284422 | 0.003840983 |
| 17429858 | Utp11l       | 0.55652468   | 0.003840983 |
| 17203657 |              | 1.372996141  | 0.003844015 |
| 17279148 | Eif5         | 0.597651918  | 0.003847978 |
| 17212888 | Mob4         | 0.736685053  | 0.003847978 |
| 17204597 |              | 1.833418654  | 0.003849267 |
| 17407412 | Sprr1a       | 1.21638258   | 0.003849661 |
| 17514049 | Taf5l        | 0.682886172  | 0.003858423 |
| 17473047 | Gm9027       | 0.736792086  | 0.00386374  |
| 17307125 | Gjb6         | 1.047876562  | 0.003869161 |
| 17314712 | Troap        | 0.797145321  | 0.003869332 |
| 17351837 | BC031181     | 0.645208652  | 0.003871436 |
| 17551123 |              | -2.761419056 | 0.003872716 |
| 17411761 | Ccne2        | 0.922756772  | 0.003874721 |
| 17293475 | Gm19792      | -1.238920402 | 0.00387871  |
| 17364111 | Ch25h        | 0.993934334  | 0.003879515 |
| 17541190 | Cul4b        | 0.746188358  | 0.003879515 |
| 17350032 | Gm5820       | -0.610621058 | 0.003879515 |
| 17400650 | Itga10       | -0.868173907 | 0.003879515 |
| 17477116 | LOC101056592 | -0.748290218 | 0.003879515 |
| 17301886 | Lpar6        | 0.682153809  | 0.003879515 |

|          |               |              |             |
|----------|---------------|--------------|-------------|
| 17416061 | Sgip1         | 0.921861693  | 0.003879515 |
| 17327989 |               | -1.087504826 | 0.003879515 |
| 17352601 |               | -0.944917204 | 0.003879515 |
| 17251370 | Myh10         | -0.940903172 | 0.003908471 |
| 17345475 | Ptk7          | -0.896503216 | 0.003909204 |
| 17359055 | Exoc6         | 1.053403369  | 0.003914367 |
| 17391983 | Prokr2        | -0.716649286 | 0.003923854 |
| 17232901 | Gm17196       | -0.834070505 | 0.003924907 |
| 17381940 | Nebl          | 0.85502994   | 0.003927248 |
| 17512940 | Sf3b3         | 1.248769358  | 0.003927248 |
| 17203237 |               | 1.71373986   | 0.003927248 |
| 17449520 |               | 0.958911245  | 0.003927248 |
| 17500801 | 2810404M03Rik | -0.80859811  | 0.003928083 |
| 17310950 | Pop1          | 1.17319131   | 0.003928083 |
| 17272530 | Srsf2         | 0.810387624  | 0.003928083 |
| 17351839 |               | 0.815281638  | 0.003928083 |
| 17274027 |               | -0.637142437 | 0.003928083 |
| 17327539 | Pcp4          | 0.856807289  | 0.003937857 |
| 17335878 | Pknox1        | 0.873518247  | 0.003937857 |
| 17355251 | 4930549G23Rik | 0.755893531  | 0.003940461 |
| 17407823 | 4930558C23Rik | -0.691256834 | 0.003940461 |
| 17548012 | Gm6594        | 0.572246439  | 0.003940461 |
| 17409217 | Gnai3         | 0.623853958  | 0.003940461 |
| 17460059 | Mob1a         | 0.613542299  | 0.003940461 |
| 17409493 | Prmt6         | 0.907992482  | 0.003940461 |
| 17451867 | Rfc5          | 0.926819784  | 0.003940461 |
| 17459735 | Lrrtm1        | 0.918423702  | 0.003943195 |
| 17278785 |               | 1.09771031   | 0.003952097 |
| 17302305 | Tdrd3         | 0.874960638  | 0.003960444 |
| 17361741 | Ehbp111       | -0.645150585 | 0.003983436 |
| 17208557 |               | -1.79639156  | 0.003984313 |
| 17340272 | Epcam         | 0.908923939  | 0.003985341 |
| 17479736 | Tm6sf1        | -1.083296127 | 0.003985362 |
| 17444100 | Chst12        | -0.837399929 | 0.003986012 |
| 17480312 | Gab2          | -0.893704307 | 0.003986012 |
| 17462219 |               | 0.796411178  | 0.003986935 |
| 17521171 | Tlr9          | -0.836869982 | 0.003994354 |
| 17324163 | Ephb3         | 0.847318212  | 0.004003899 |
| 17430824 | Snhg3         | 1.024401794  | 0.004005176 |
| 17214487 | Speg          | -0.933672471 | 0.004006726 |
| 17339013 | Emr1          | -1.758509288 | 0.004017594 |
| 17240608 | Qrs1          | 0.723725434  | 0.00403411  |
| 17434510 | Slc25a40      | 0.86999098   | 0.00403411  |

|          |               |              |             |
|----------|---------------|--------------|-------------|
| 17295670 | Ocln          | 1.360778111  | 0.004040869 |
| 17426365 | Tnc           | -1.093207825 | 0.004043146 |
| 17359966 |               | -0.785850134 | 0.004043146 |
| 17411435 | Srsf11        | 0.636380728  | 0.004045928 |
| 17346840 | Rab12         | 0.577948487  | 0.004055392 |
| 17280742 | 9130015A21Rik | -0.698005888 | 0.004055719 |
| 17359449 | Gm340         | 0.879586493  | 0.004055719 |
| 17277592 | Gstz1         | 0.896162733  | 0.004055719 |
| 17361663 | Kat5          | 0.756783552  | 0.004056145 |
| 17255788 | Arhgap23      | -0.697991383 | 0.004066046 |
| 17351862 | Smad7         | -0.735088326 | 0.004066046 |
| 17540027 | Wdr13         | 0.547523897  | 0.004066046 |
| 17202789 |               | -0.907083725 | 0.004066046 |
| 17529356 |               | -1.697334004 | 0.004069998 |
| 17352036 | Pstpip2       | 0.971287017  | 0.004075397 |
| 17332236 | Runx1         | -0.876770116 | 0.004081172 |
| 17436457 | Tacc3         | 0.953982976  | 0.004082493 |
| 17292370 | Fam120a       | -0.594914265 | 0.00408594  |
| 17453205 | Sbds          | 0.622498061  | 0.00408594  |
| 17223903 | Acadl         | 0.672388043  | 0.004088219 |
| 17280009 | Ddx1          | 0.691829743  | 0.004089778 |
| 17516921 | Zfp259        | 0.690912634  | 0.004091427 |
| 17386481 | Ola1          | 0.576039586  | 0.004116572 |
| 17299518 | Parp2         | 0.659479606  | 0.004119701 |
| 17550324 | LOC100861696  | 1.157269697  | 0.004121776 |
| 17550348 | LOC100861696  | 1.157269697  | 0.004121776 |
| 17275237 | Pnpla8        | 0.803586723  | 0.004121776 |
| 17208727 |               | 1.141692204  | 0.004125325 |
| 17498099 | Ctsd          | -0.653060396 | 0.004142293 |
| 17530033 | Esyt3         | 1.09957663   | 0.004142293 |
| 17281529 | Nemf          | 0.83227515   | 0.004154642 |
| 17358682 | Minpp1        | 0.731985975  | 0.004154768 |
| 17445303 | Mterf         | 1.071397629  | 0.004154768 |
| 17210735 |               | -1.48521677  | 0.004169777 |
| 17442863 | Sfswap        | 0.763616414  | 0.004200012 |
| 17328451 | Mzt2          | 0.731520929  | 0.004205362 |
| 17312606 | Zfp7          | 0.601423119  | 0.004206196 |
| 17339840 | Gpatch11      | 0.630357308  | 0.004217862 |
| 17222596 | 1700066B17Rik | -0.744870834 | 0.004219308 |
| 17244341 | Elk3          | -1.012662968 | 0.004219308 |
| 17520922 | Rab6b         | 1.433078096  | 0.004219308 |
| 17426784 | 2310067E19Rik | -1.114646008 | 0.004224846 |
| 17249524 | Shroom1       | -0.658983875 | 0.004224846 |

|          |               |              |             |
|----------|---------------|--------------|-------------|
| 17239616 | Pex7          | 0.823172418  | 0.004225689 |
| 17538815 |               | -0.933086626 | 0.004226248 |
| 17302802 | Farp1         | -0.864489777 | 0.00422733  |
| 17539932 | Hdac6         | 0.742998038  | 0.004228009 |
| 17338353 | n-R5s28       | -0.963020728 | 0.004228009 |
| 17376822 | Snap25        | 2.068974541  | 0.004228009 |
| 17457731 | Try4          | -1.005854043 | 0.004228009 |
| 17207407 |               | -1.325167304 | 0.004228009 |
| 17474205 | Dact3         | -0.726771442 | 0.004239826 |
| 17240554 |               | -1.180661499 | 0.004239826 |
| 17255260 | Col1a1        | -1.179564364 | 0.004243346 |
| 17485553 | Tmc4          | 0.912803042  | 0.004243346 |
| 17375244 | Map1a         | -0.700116117 | 0.00424349  |
| 17498830 | Ccl25         | 0.860129215  | 0.004255373 |
| 17221633 | Mcm3          | 1.016404759  | 0.004255373 |
| 17260885 | Aftph         | 0.669389306  | 0.00425702  |
| 17548413 | Ssh1          | -0.759304616 | 0.00425702  |
| 17526850 | AU019823      | 0.793105889  | 0.004260782 |
| 17353752 | Ndufa2        | -0.76293527  | 0.004260782 |
| 17330029 | 1700119H24Rik | -0.844473421 | 0.004263861 |
| 17466507 | Ezh2          | 0.738587856  | 0.004263861 |
| 17437278 | Ncapg         | 1.059539227  | 0.004263861 |
| 17437459 | Slc34a2       | 1.485974046  | 0.004263861 |
| 17218027 | Uchl5         | 0.997657204  | 0.004263861 |
| 17376677 | Bmp2          | 0.761806541  | 0.004278261 |
| 17347846 | Srbd1         | 0.780517143  | 0.00428066  |
| 17301452 | Clu           | 0.565664163  | 0.004286897 |
| 17294066 | Mtrr          | 0.846628112  | 0.004303703 |
| 17250236 | 4933439C10Rik | 0.734077285  | 0.004306091 |
| 17262316 | Ltc4s         | -0.621673436 | 0.004320612 |
| 17482626 | Mettl9        | 0.633622891  | 0.004320612 |
| 17460342 | Tprkb         | 0.787065777  | 0.004320612 |
| 17205005 |               | 1.740188658  | 0.004320612 |
| 17325367 |               | -0.771289715 | 0.004320612 |
| 17536517 | Otud6a        | -0.760547406 | 0.004323176 |
| 17363644 | Cbwd1         | 0.815052363  | 0.004324352 |
| 17485424 | Gm10152       | -0.810219318 | 0.004325209 |
| 17455801 | Col1a2        | -1.125363884 | 0.004333064 |
| 17310004 | Rictor        | 0.78909203   | 0.004333064 |
| 17200281 |               | 2.301242404  | 0.004333064 |
| 17365911 | Ablim1        | 0.958794148  | 0.004333243 |
| 17518935 | Narg2         | 0.697878585  | 0.004333243 |
| 17220776 | Nsl1          | 1.039145251  | 0.004335107 |

|          |               |              |             |
|----------|---------------|--------------|-------------|
| 17247550 | Peli1         | 0.689211263  | 0.004335107 |
| 17204949 |               | -1.170206937 | 0.004335107 |
| 17348452 |               | 1.094042805  | 0.004335107 |
| 17327681 | Crebbp        | -0.79715985  | 0.004341014 |
| 17305221 | Fam213a       | 0.805088851  | 0.004349107 |
| 17540273 | 1810030O07Rik | 0.712153934  | 0.004353143 |
| 17253858 | Atad5         | 0.892798567  | 0.004359266 |
| 17545121 | Dcx           | 1.70431786   | 0.004359266 |
| 17305826 | Gm6055        | 0.829414673  | 0.004359266 |
| 17372066 | Hoxd9         | -0.622839223 | 0.004359266 |
| 17319957 | Sult4a1       | 0.75672509   | 0.004359266 |
| 17532135 |               | -0.851412149 | 0.004359266 |
| 17207623 |               | 1.167354656  | 0.004359266 |
| 17219324 | Arhgap30      | -0.6629483   | 0.004360086 |
| 17449052 | Hopx          | 0.720033234  | 0.00436165  |
| 17360486 | Vti1a         | 0.848904987  | 0.00436165  |
| 17435855 | Mapre3        | -0.626134708 | 0.004364269 |
| 17209983 |               | -0.731463108 | 0.004364269 |
| 17488945 | Zfp566        | 0.635332002  | 0.004364888 |
| 17393336 | Edem2         | 0.687368191  | 0.004365028 |
| 17389844 | Rhov          | 0.720019339  | 0.004365664 |
| 17365493 | Obfc1         | 0.650343107  | 0.004368897 |
| 17228046 | Rnf2          | 0.636580617  | 0.004368897 |
| 17344034 | Skiv2l        | -0.633705755 | 0.004368897 |
| 17367137 | Mir511        | -0.915297344 | 0.004369812 |
| 17470988 | Ptms          | -0.579017657 | 0.004369812 |
| 17504751 | Tmem208       | 0.595645176  | 0.004378158 |
| 17290139 | 4833420G17Rik | 0.654633909  | 0.004385279 |
| 17401768 | Clcc1         | 0.667455205  | 0.004385279 |
| 17276182 | Jkamp         | 0.593101598  | 0.004385279 |
| 17216201 | Gin1          | 0.838001304  | 0.004395127 |
| 17483840 |               | -1.198764185 | 0.004395127 |
| 17508163 |               | 0.800128652  | 0.004395127 |
| 17203583 |               | 1.076312793  | 0.004405372 |
| 17330148 |               | -0.918074845 | 0.004413127 |
| 17529398 | Me1           | 0.766842316  | 0.004416491 |
| 17464588 | Sgce          | 0.603062739  | 0.004419068 |
| 17302989 | Gm3696        | 1.00401729   | 0.004426707 |
| 17234667 | Pttg1ip       | 0.662841409  | 0.004431475 |
| 17248242 | Snrnp25       | 0.792908055  | 0.004431475 |
| 17304860 | Timm23        | 0.541763659  | 0.004431475 |
| 17271751 | Gm11711       | -0.758268049 | 0.004432973 |
| 17497036 | 2310057M21Rik | 0.910167389  | 0.004433024 |

|          |              |              |             |
|----------|--------------|--------------|-------------|
| 17331873 | Krtap19-4    | -0.863898478 | 0.004433024 |
| 17375100 | Haus2        | 0.638629322  | 0.004434054 |
| 17420440 |              | 1.400542626  | 0.004434054 |
| 17326735 | Chodl        | 0.641070317  | 0.004439142 |
| 17201563 |              | -1.162156685 | 0.004439142 |
| 17514678 | Maml2        | -0.933348783 | 0.004442949 |
| 17513158 | Bcar1        | -0.616895197 | 0.004456106 |
| 17257801 | Axin2        | 0.938995482  | 0.004459518 |
| 17490050 | Zfp141       | 1.222236165  | 0.004459518 |
| 17399402 |              | -0.927593208 | 0.004465036 |
| 17499843 | Ccdc70       | -0.558700517 | 0.004471017 |
| 17279670 | Rapgef5      | 0.756655493  | 0.004478302 |
| 17401246 | Ap4b1        | 1.017695354  | 0.004483523 |
| 17544284 | Nap1l3       | 0.75828541   | 0.004483523 |
| 17510707 | Lsm6         | 0.862631232  | 0.004487724 |
| 17425855 | Inip         | 1.000994982  | 0.004505722 |
| 17551115 |              | -3.550828749 | 0.004505722 |
| 17438196 | Fip1l1       | 0.60593506   | 0.004506917 |
| 17245013 | Tbc1d15      | 0.604954643  | 0.004506917 |
| 17206539 |              | 1.563057331  | 0.004506917 |
| 17357671 | Ms4a6c       | -1.193602116 | 0.004517057 |
| 17505903 | Gm15655      | -0.994173061 | 0.004518187 |
| 17422337 | Megf6        | -1.321264511 | 0.004527051 |
| 17437876 | Uchl1        | 1.159278987  | 0.004527051 |
| 17340532 | LOC101055731 | -0.557776347 | 0.004559425 |
| 17502378 | Tpm4         | 0.548123483  | 0.004561608 |
| 17460385 | Tgfa         | 1.141494828  | 0.00459871  |
| 17286283 | Dusp22       | 0.598552692  | 0.004604493 |
| 17514732 | Sesn3        | 0.751132765  | 0.004613616 |
| 17414760 | Atp6v1g1     | 0.576978822  | 0.004616346 |
| 17341269 | Has1         | -0.596406771 | 0.004616346 |
| 17381171 | Pcmt2        | 0.752783018  | 0.004616346 |
| 17538830 |              | -0.784872104 | 0.004618473 |
| 17415535 | Gm3831       | -0.561936566 | 0.004621268 |
| 17403625 | Fubp1        | 0.646031204  | 0.004630451 |
| 17240945 | Serinc1      | 0.673121526  | 0.004638929 |
| 17438320 |              | 0.802056294  | 0.004638929 |
| 17538816 |              | -1.064810978 | 0.004639306 |
| 17282886 | Nrp          | 0.585413456  | 0.004639437 |
| 17267846 | Abcc3        | -1.227764162 | 0.004639553 |
| 17444961 | Alox5ap      | -1.366589467 | 0.004639553 |
| 17371684 | Dcaf17       | 0.687253805  | 0.004639553 |
| 17286254 | Mboat1       | 0.864788601  | 0.004639553 |



|          |               |              |             |
|----------|---------------|--------------|-------------|
| 17261272 | Rps27a        | 0.715088037  | 0.004639553 |
| 17505426 | Ap1g1         | 0.844070699  | 0.00464174  |
| 17358838 | Kif20b        | 1.223511825  | 0.00464174  |
| 17548468 | Gm3470        | -0.789293023 | 0.004644532 |
| 17241001 | Oit3          | 1.286895126  | 0.004644532 |
| 17232937 | Ostm1         | 0.755624249  | 0.004644532 |
| 17203673 |               | 1.518651798  | 0.004644532 |
| 17208437 |               | -1.526403102 | 0.004653367 |
| 17400804 |               | 0.876416882  | 0.00465676  |
| 17335936 | Cyp4f39       | 0.843905716  | 0.004660086 |
| 17416761 | Kti12         | 0.763192617  | 0.004660086 |
| 17201065 |               | 1.434737305  | 0.004660086 |
| 17332050 | Synj1         | 0.762884398  | 0.004662341 |
| 17248539 | Gabrb2        | 0.951652914  | 0.004665095 |
| 17545675 | Mbtps2        | 0.761632462  | 0.00466588  |
| 17254670 | Ska2          | 0.743156594  | 0.004675814 |
| 17461554 | Mtmr14        | 0.662297701  | 0.004685586 |
| 17313721 | Parvg         | -0.851882361 | 0.004685998 |
| 17205899 |               | 0.819097631  | 0.004685998 |
| 17223848 | Cryga         | 2.105642517  | 0.004700725 |
| 17465512 | Tmem209       | 1.017384779  | 0.004714384 |
| 17404269 | Pde7a         | 1.086337178  | 0.004714679 |
| 17466783 | Skap2         | 0.79979521   | 0.004717706 |
| 17295926 | Trappc13      | 0.611804899  | 0.004718118 |
| 17271091 | Nol11         | 0.628746363  | 0.004736918 |
| 17200935 |               | 1.630553096  | 0.004745478 |
| 17372564 | Cwc22         | 0.919551175  | 0.004748302 |
| 17372566 | Cwc22         | 0.919551175  | 0.004748302 |
| 17372568 | Cwc22         | 0.919551175  | 0.004748302 |
| 17372570 | Cwc22         | 0.919551175  | 0.004748302 |
| 17372572 | Cwc22         | 0.919551175  | 0.004748302 |
| 17372574 | Cwc22         | 0.919551175  | 0.004748302 |
| 17372576 | Cwc22         | 0.919551175  | 0.004748302 |
| 17298528 | Parg          | 0.679920156  | 0.004748302 |
| 17545399 | Tsr2          | 0.778957533  | 0.004763946 |
| 17213349 | Carf          | 0.892757364  | 0.004765779 |
| 17316105 | 6030458C11Rik | 1.002178023  | 0.004767265 |
| 17243014 | Abhd17a       | -0.647309446 | 0.004767265 |
| 17527590 | Clk3          | 0.709688908  | 0.004767265 |
| 17437773 | Lias          | 0.681343519  | 0.004767265 |
| 17214825 | LOC637796     | 0.551791232  | 0.004767265 |
| 17501633 | Lpl           | -0.976501545 | 0.004767265 |
| 17363862 | Ranbp6        | 0.811383243  | 0.004767265 |

|          |              |              |             |
|----------|--------------|--------------|-------------|
| 17399995 | S100a11      | -0.619816545 | 0.004767265 |
| 17489587 | Uba2         | 0.58287526   | 0.004767265 |
| 17536931 |              | -0.565983724 | 0.004767265 |
| 17536943 |              | -0.565983724 | 0.004767265 |
| 17279154 |              | 0.594133448  | 0.004767265 |
| 17457781 | Tcrb-J       | -0.991749682 | 0.004775238 |
| 17492047 | Gm16158      | -0.82254959  | 0.004779172 |
| 17486899 | Sae1         | 0.633237732  | 0.004779172 |
| 17373811 |              | -1.076875291 | 0.004779849 |
| 17292640 | Ror2         | -0.623991857 | 0.00478855  |
| 17532692 | LOC100861738 | 1.078963888  | 0.004793986 |
| 17271931 | Sumo2        | 0.604562696  | 0.004794283 |
| 17393375 | Uqcc         | 0.587218012  | 0.004798941 |
| 17478730 | Gabrb3       | 0.86722046   | 0.004800231 |
| 17537455 | Gm17714      | -0.680066779 | 0.004800231 |
| 17548628 | Gm19514      | -0.702704366 | 0.004800231 |
| 17320974 | Rpap3        | 0.671602649  | 0.004800231 |
| 17548508 | Tra2a        | 1.193505557  | 0.004800231 |
| 17508994 | Zfp42        | 1.124802356  | 0.004800231 |
| 17227157 |              | -0.870361689 | 0.004800231 |
| 17544297 |              | -0.680066779 | 0.004800231 |
| 17544305 |              | -0.680066779 | 0.004800231 |
| 17544313 |              | -0.680066779 | 0.004800231 |
| 17544321 |              | -0.680066779 | 0.004800231 |
| 17232003 | Hbs1l        | 0.643403235  | 0.00480619  |
| 17414266 |              | -0.766782916 | 0.00480619  |
| 17548808 | Gpc3         | -0.986341685 | 0.004807446 |
| 17442823 | Ran          | 0.599005285  | 0.004820783 |
| 17315007 | Mettl7a3     | -2.59477529  | 0.004822502 |
| 17430576 | Tinagl1      | 0.701392712  | 0.004823396 |
| 17447147 |              | 1.131680149  | 0.004823396 |
| 17326428 | Cpox         | 0.674492776  | 0.00485006  |
| 17280749 | Tspan13      | 0.997269647  | 0.00485006  |
| 17222623 |              | -0.734435899 | 0.00485006  |
| 17528319 | Snx22        | -0.558303284 | 0.004859985 |
| 17470175 | Zfp248       | 1.182841032  | 0.004859985 |
| 17242535 | Syde1        | -0.940066603 | 0.00486435  |
| 17331422 | LOC100861916 | 0.90580834   | 0.004875388 |
| 17278773 | Rian         | 1.436936017  | 0.004875388 |
| 17443596 | Actl6b       | 0.619111299  | 0.004877309 |
| 17529569 | Gm2382       | 0.621364399  | 0.004884239 |
| 17494651 | Gm4070       | -1.096503876 | 0.004884656 |
| 17416690 | Orc1         | 0.960147507  | 0.004884656 |

|          |               |              |             |
|----------|---------------|--------------|-------------|
| 17506947 |               | -0.94080641  | 0.004884656 |
| 17419613 | 1810019J16Rik | 1.054374148  | 0.004887384 |
| 17332140 | Gart          | 0.743402204  | 0.004887384 |
| 17285815 | Hist1h4h      | 0.899570049  | 0.004887384 |
| 17525868 | Ubash3b       | 0.975459101  | 0.004887384 |
| 17474621 | Ckm           | -0.747894018 | 0.00488837  |
| 17305719 | Cnih          | 0.538045842  | 0.00488837  |
| 17478201 | Gtf2h1        | 0.83841448   | 0.00488837  |
| 17351204 | Napg          | 0.684355331  | 0.00488837  |
| 17214039 |               | -1.2898924   | 0.00488837  |
| 17214041 |               | -1.2898924   | 0.00488837  |
| 17214043 |               | -1.2898924   | 0.00488837  |
| 17254200 |               | -1.2898924   | 0.00488837  |
| 17528878 | Scg3          | 1.850738918  | 0.004903209 |
| 17383748 | Fnbp1         | -0.633104598 | 0.004920391 |
| 17227515 | Nr5a2         | -0.714073541 | 0.00492831  |
| 17368302 | Pmpca         | 0.687001747  | 0.004932171 |
| 17462407 | Bcl2l13       | 0.884692332  | 0.004939842 |
| 17407969 | Plekho1       | -0.634174544 | 0.00494209  |
| 17355443 | Lipg          | 1.381413797  | 0.004947655 |
| 17318950 | Csf2rb2       | -1.36452705  | 0.004953705 |
| 17287414 | Sfxn1         | 0.771248001  | 0.004957903 |
| 17403775 | Cryz          | 0.991686314  | 0.004958168 |
| 17216301 |               | -0.884087298 | 0.004962781 |
| 17471311 | Rhno1         | 0.811202813  | 0.004964686 |
| 17437790 | Ube2k         | 0.567537632  | 0.004964686 |
| 17354004 | Yipf5         | 0.571404405  | 0.004964686 |
| 17408640 |               | -0.926668556 | 0.004964686 |
| 17358014 |               | 1.091359311  | 0.004972109 |
| 17225586 | Myeov2        | 0.664975744  | 0.004972855 |
| 17287338 | Secisbp2      | 0.626934291  | 0.004972855 |
| 17372970 | Olfr1265      | -1.109057679 | 0.004992949 |
| 17403340 | Odf2l         | 0.861709863  | 0.004999901 |
| 17475214 |               | -1.06769282  | 0.004999901 |
| 17296082 | Apoo-ps       | 0.782044018  | 0.00500293  |
| 17349034 | Fhod3         | 0.799683016  | 0.00500293  |
| 17493395 | Gm15416       | -0.743206232 | 0.00500293  |
| 17353520 | Cdc25c        | 1.014073894  | 0.005011048 |
| 17461205 | Chl1          | 1.828438379  | 0.005011048 |
| 17217946 | F13b          | -0.663719711 | 0.005011048 |
| 17379981 | Pard6b        | 0.805994435  | 0.005011048 |
| 17347801 | Prepl         | 1.002276234  | 0.005011048 |
| 17422612 | Slc35e2       | 0.800584317  | 0.005011048 |

|          |               |              |             |
|----------|---------------|--------------|-------------|
| 17446093 |               | -1.730434568 | 0.005011048 |
| 17235890 | Hcfc2         | 0.710842568  | 0.005011724 |
| 17224629 | Obsl1         | -0.60784169  | 0.005016546 |
| 17258994 | Gaa           | -0.579298549 | 0.005019055 |
| 17377092 | Sec23b        | 0.643218551  | 0.005019055 |
| 17493024 | Zfand6        | 0.629680539  | 0.005028859 |
| 17244126 | Actr6         | 0.59709719   | 0.005031671 |
| 17201601 |               | -0.738189237 | 0.005032151 |
| 17487046 | Psg28         | -0.827070039 | 0.005044409 |
| 17543014 | Mageb16       | 1.220618619  | 0.0050592   |
| 17423444 | Necab1        | 0.776024166  | 0.0050592   |
| 17468509 |               | -1.155369463 | 0.0050592   |
| 17299279 | Cgrf1         | 0.657159058  | 0.005059566 |
| 17271033 | Kpna2         | 0.63110626   | 0.005059566 |
| 17287471 | Faf2          | 0.599080501  | 0.005060231 |
| 17477127 | Vsig10l       | 0.728584864  | 0.005061332 |
| 17210363 |               | 1.674487303  | 0.005064197 |
| 17383104 | Agpat2        | 0.677934612  | 0.005065201 |
| 17522319 | Cspg5         | 0.733551048  | 0.005065201 |
| 17336921 | Ly6g6c        | 2.157720959  | 0.005065201 |
| 17362941 | Ms4a14        | -1.77963378  | 0.005077048 |
| 17366856 | Mir466b-2     | 0.960985727  | 0.005084122 |
| 17550382 | Dio3os        | -1.622704813 | 0.005084862 |
| 17548948 | Gm21710       | 0.865256247  | 0.005084862 |
| 17325386 | lqcb1         | 0.549841889  | 0.005084862 |
| 17419469 | Rpa2          | 0.821432294  | 0.005084862 |
| 17376119 | Chchd5        | 0.562705496  | 0.005090305 |
| 17391997 | Gpcpd1        | 0.609428928  | 0.005090305 |
| 17226720 | Il20          | -0.494074187 | 0.005100882 |
| 17363488 | 1110059E24Rik | 0.917705301  | 0.00510251  |
| 17400720 | Rnf115        | 0.627016424  | 0.00510251  |
| 17213139 | Bzw1          | 0.543869148  | 0.005103057 |
| 17355231 | Ptpn2         | 0.595392359  | 0.005103057 |
| 17449516 | Cox18         | 0.653971908  | 0.005104752 |
| 17433555 | Smim1         | -0.915561445 | 0.005124342 |
| 17423215 | Ndufaf6       | 0.906164502  | 0.005127621 |
| 17270783 | Ftsj3         | 0.912199033  | 0.005137711 |
| 17398653 |               | -1.922427693 | 0.005137711 |
| 17362240 | Stip1         | 0.675618105  | 0.005139966 |
| 17479012 | Lins          | 0.676107653  | 0.0051669   |
| 17388821 | Nat10         | 0.55662815   | 0.0051669   |
| 17399235 | n-R5s197      | -0.990247016 | 0.005169772 |
| 17438338 | Exoc1         | 0.749858055  | 0.005184073 |

|          |               |              |             |
|----------|---------------|--------------|-------------|
| 17445426 | Steap2        | -0.88086506  | 0.005191389 |
| 17333342 | Tcp1          | 1.025538125  | 0.005191389 |
| 17302724 | Dnajc3        | 0.628539064  | 0.005193025 |
| 17502781 | Anapc10       | 0.756025835  | 0.005194585 |
| 17495307 |               | 0.912977719  | 0.005195467 |
| 17233022 | Cd24a         | 0.933334435  | 0.005198606 |
| 17485226 | Lsp1          | -0.752148405 | 0.005198606 |
| 17449521 |               | 0.849812429  | 0.005205954 |
| 17210153 |               | -0.747176488 | 0.005205954 |
| 17459207 | Ndnf          | 1.445302584  | 0.005210249 |
| 17387426 | Gm13710       | -0.853094758 | 0.00522119  |
| 17446145 | Gm15587       | -0.668854043 | 0.00522119  |
| 17312746 | Kctd17        | -0.631588271 | 0.00522119  |
| 17227311 | Shisa4        | -0.777458904 | 0.00524561  |
| 17460461 |               | -0.745420903 | 0.00525042  |
| 17363954 | Sgms1         | 0.645486829  | 0.005250703 |
| 17325312 | Ccdc58        | 0.612170581  | 0.005257895 |
| 17529647 | Morf4l1       | 0.823440192  | 0.005271377 |
| 17526576 | Tagln         | -0.5964909   | 0.005280569 |
| 17203251 |               | 1.406486858  | 0.005285981 |
| 17460622 | Rpn1          | 0.547221321  | 0.005292791 |
| 17236708 | Ccdc41        | 0.782344317  | 0.005318576 |
| 17421233 | Gm13023       | -1.129329466 | 0.005325886 |
| 17544088 | 2610002M06Rik | 0.693567215  | 0.005334053 |
| 17258186 | Ict1          | 0.649995495  | 0.005334053 |
| 17473959 | Obox2         | -0.830602848 | 0.005334053 |
| 17465449 | Tnpo3         | 0.916556757  | 0.005334579 |
| 17357219 | Hnrnpul2      | 0.78398077   | 0.005336769 |
| 17311649 | Derl1         | 1.021916974  | 0.005339801 |
| 17392633 |               | 0.919983304  | 0.005339801 |
| 17372984 | Nup160        | 0.809283466  | 0.005341779 |
| 17352603 | Usp14         | 0.773488059  | 0.005343519 |
| 17389578 | Atpbd4        | 1.032331958  | 0.005344045 |
| 17508589 | Mir1186       | -0.728613433 | 0.005344045 |
| 17204135 |               | 1.552903392  | 0.005344045 |
| 17528932 |               | -1.221588663 | 0.00534539  |
| 17508508 | 2310008N11Rik | -0.606581447 | 0.005352321 |
| 17501272 | Hand2         | -0.8066785   | 0.005355736 |
| 17472199 | Erp27         | -0.612270278 | 0.005358102 |
| 17206083 |               | -1.283499872 | 0.005372087 |
| 17517142 | Fdxacb1       | 0.625368384  | 0.005372325 |
| 17367436 | Gm13363       | 0.620624484  | 0.005372325 |
| 17491315 | Mrgpra9       | -0.6611739   | 0.005372325 |

|          |               |              |             |
|----------|---------------|--------------|-------------|
| 17297161 | 3830406C13Rik | 0.637102293  | 0.005385403 |
| 17282296 | Gm20337       | 0.766291591  | 0.005385403 |
| 17516280 | Olfr150       | 0.7796287    | 0.005385403 |
| 17229269 | Rcsd1         | -0.745161737 | 0.005391578 |
| 17257558 |               | 0.645397081  | 0.005399598 |
| 17235053 | Wdr18         | 0.821368934  | 0.005406601 |
| 17372156 | Gm13657       | 0.706379635  | 0.005408697 |
| 17345666 | Gm16494       | 0.590864872  | 0.005408697 |
| 17550126 | Mir669a-2     | 1.421533336  | 0.005408697 |
| 17287107 | Ninj1         | -0.710245467 | 0.005408697 |
| 17290815 | Rala          | 0.637425818  | 0.005408697 |
| 17453819 | Serpine1      | -0.915137553 | 0.005408697 |
| 17394782 | Dpm1          | 0.543249878  | 0.005410334 |
| 17360585 | Nhlrc2        | 0.998349585  | 0.005410334 |
| 17493949 | Folr2         | -1.252051879 | 0.005410368 |
| 17465044 | Tspan12       | 0.579866622  | 0.005429726 |
| 17409026 | Ubl4b         | -0.656137917 | 0.005445734 |
| 17311701 | Wdyhv1        | -0.697896689 | 0.005445734 |
| 17259528 |               | -0.80330661  | 0.005445734 |
| 17515952 | Pus3          | 0.703167827  | 0.005446974 |
| 17345029 | Gpr111        | 0.855957855  | 0.00544792  |
| 17296013 | Ipo11         | 0.653608502  | 0.005451216 |
| 17372552 | Fam171b       | 1.339066415  | 0.005451838 |
| 17311871 | 4930449C09Rik | -0.609145319 | 0.00546137  |
| 17217469 | Klhl12        | 0.547914937  | 0.00546137  |
| 17414112 |               | -0.734337491 | 0.00546137  |
| 17351196 | Apcdd1        | 1.007008858  | 0.005461771 |
| 17469289 | Eogt          | 0.962900117  | 0.005461771 |
| 17490024 | Vmn2r58       | -1.434450675 | 0.005461771 |
| 17481982 | Far1          | 0.502397005  | 0.005466031 |
| 17403994 | Il7           | -0.603438845 | 0.005470427 |
| 17406450 | Snord73a      | 1.375620859  | 0.005475385 |
| 17277043 | Dcaf4         | 1.052977156  | 0.005480715 |
| 17459693 | Gm20536       | 1.54097216   | 0.005480715 |
| 17365286 | 9130011E15Rik | 1.050066576  | 0.00548216  |
| 17508949 | Asah1         | 0.59945495   | 0.00548216  |
| 17342829 | Tead3         | -0.698891825 | 0.00548216  |
| 17501041 | Casp3         | 0.885136659  | 0.005486029 |
| 17234165 | LOC101056131  | -0.552712841 | 0.005491111 |
| 17506296 | Foxc2         | -0.785187681 | 0.005491839 |
| 17396553 | Mynn          | 0.699935503  | 0.00549658  |
| 17388089 | Ptpmt1        | 0.772618704  | 0.00549658  |
| 17323465 | Snap29        | 0.633245881  | 0.005510408 |

|          |               |              |             |
|----------|---------------|--------------|-------------|
| 17381626 | 8030442B05Rik | -0.676180569 | 0.005514419 |
| 17243678 | D10Wsu52e     | 0.58555682   | 0.005520629 |
| 17409839 | Ptbp2         | 0.872605683  | 0.005520629 |
| 17274394 |               | 1.128624615  | 0.005520629 |
| 17274480 |               | -1.309915472 | 0.005522207 |
| 17484952 | Tspan4        | -0.584893008 | 0.005529678 |
| 17482503 | BC030336      | 0.590847593  | 0.005534901 |
| 17377071 | Polr3f        | 0.689893597  | 0.005548792 |
| 17402541 | Pitx2         | 0.893529983  | 0.005562092 |
| 17337553 | Gm20429       | -0.732051322 | 0.005567183 |
| 17267418 | A130040M12Rik | -1.336418794 | 0.005570128 |
| 17439590 | Cops4         | 0.573409173  | 0.005570128 |
| 17201593 |               | -1.742357654 | 0.005571444 |
| 17522651 | Clasp2        | 0.71816523   | 0.005577863 |
| 17207925 |               | 1.239930577  | 0.005581012 |
| 17549076 |               | -0.888381335 | 0.005589344 |
| 17469339 |               | 1.289650743  | 0.005591318 |
| 17359008 | March5        | 0.564221533  | 0.005594013 |
| 17525746 | AW551984      | 0.939046686  | 0.005596703 |
| 17500996 | Acs1          | 0.7460387    | 0.005596939 |
| 17278073 | Golga5        | 0.866922707  | 0.005596939 |
| 17289553 | Sgtb          | 1.040603568  | 0.005596939 |
| 17203431 |               | 2.132636695  | 0.005596939 |
| 17284354 | Igh-VX24      | -1.227276084 | 0.005598894 |
| 17221081 | Mrpl15        | 0.732883072  | 0.005598894 |
| 17476175 | Zfp84         | 0.896254379  | 0.005610476 |
| 17449523 |               | 1.401482197  | 0.005611467 |
| 17302061 | Nufip1        | 0.746041587  | 0.005618233 |
| 17464672 | Slc25a13      | 0.791585808  | 0.005621866 |
| 17532651 | mt-Te         | -0.788886341 | 0.00562627  |
| 17315388 |               | -1.241059333 | 0.005626792 |
| 17264996 | Tnk1          | 0.928187389  | 0.005628036 |
| 17325787 | Spice1        | 0.719201769  | 0.005631411 |
| 17343478 | Zfp799        | 1.056187645  | 0.005631411 |
| 17374053 | Kcna4         | 1.022720592  | 0.005643167 |
| 17339108 | Man2a1        | -0.88425353  | 0.005649727 |
| 17350693 |               | -0.762761528 | 0.005656178 |
| 17269758 | Psmc3ip       | 0.804159404  | 0.005670589 |
| 17315387 |               | 0.756512482  | 0.005670985 |
| 17208947 |               | 1.604371764  | 0.005674558 |
| 17223659 | Gm11610       | -0.707104595 | 0.005674649 |
| 17529966 | Mrps22        | 0.601314612  | 0.005674649 |
| 17464986 | Asz1          | -0.607360255 | 0.005680561 |

|          |               |              |             |
|----------|---------------|--------------|-------------|
| 17363220 | Cep78         | 0.824848096  | 0.005680561 |
| 17459530 | Immt          | 0.735581413  | 0.005680561 |
| 17451661 | Unc119b       | 0.706772797  | 0.005680561 |
| 17362494 | Polr2g        | 0.648923842  | 0.005681598 |
| 17543085 | n-R5s10       | -0.946365199 | 0.005682961 |
| 17472467 | Recql         | 0.621889     | 0.005682961 |
| 17414228 | Fktn          | 0.82402476   | 0.005698452 |
| 17532472 | Cdcp1         | 0.989756976  | 0.005709866 |
| 17442060 | Pptc7         | 1.177921245  | 0.005713428 |
| 17500453 | Tex15         | 1.138030884  | 0.00571625  |
| 17409736 | Slc35a3       | 0.739246441  | 0.005722145 |
| 17491440 | Nipa2         | 0.795744466  | 0.005729989 |
| 17368550 | Rxra          | -0.717110989 | 0.005729989 |
| 17297374 | Nkiras1       | 0.6193647    | 0.005743318 |
| 17540203 | Rpgr          | 0.943852717  | 0.005744957 |
| 17518458 | Igdcc4        | -0.926465358 | 0.005746367 |
| 17241840 | Fam211b       | -0.662207281 | 0.00574654  |
| 17308669 | Gm15628       | -0.769000589 | 0.00574654  |
| 17512379 | Mir328        | -1.204483797 | 0.00574654  |
| 17550298 | Mir328        | -1.204483797 | 0.00574654  |
| 17455608 | Rfc3          | 0.659334985  | 0.00574654  |
| 17294736 |               | -1.449955509 | 0.00574654  |
| 17460405 | Tia1          | 0.901561598  | 0.005752023 |
| 17287336 |               | 1.144959274  | 0.005756812 |
| 17537173 | 2810403D21Rik | 0.68419549   | 0.005759716 |
| 17443752 | Cops6         | 0.51222079   | 0.005763944 |
| 17359608 | Entpd7        | 0.738329267  | 0.005763944 |
| 17314439 | Pphln1        | 0.679175568  | 0.005765597 |
| 17371427 | Dhrs9         | -0.761081736 | 0.005769194 |
| 17449176 | Uba6          | 0.600499652  | 0.005769194 |
| 17293903 | Zfp708        | 0.868965939  | 0.005771288 |
| 17296595 | Gm10413       | 1.154839182  | 0.005783439 |
| 17246213 | Pa2g4         | 0.523267448  | 0.005783439 |
| 17328582 | Ppil2         | 0.583054798  | 0.005783439 |
| 17274352 | Gm9292        | 0.717966571  | 0.005784219 |
| 17233286 | Nepn          | 1.857205917  | 0.005784219 |
| 17258023 | LOC100862618  | -0.817974392 | 0.005802365 |
| 17260944 | Mdh1          | 0.558072039  | 0.005802365 |
| 17407561 | Snx27         | 0.525204219  | 0.00580606  |
| 17328719 | Thap7         | -0.538671203 | 0.00580606  |
| 17462191 | Zfp239        | 0.671721714  | 0.005806173 |
| 17237767 | Ppm1h         | -0.601526432 | 0.005806951 |
| 17397774 | Tsc22d2       | -0.542437654 | 0.005806951 |



|          |               |              |             |
|----------|---------------|--------------|-------------|
| 17329016 | Iglv1         | -0.811568308 | 0.005819912 |
| 17334299 | 2610019E17Rik | 1.080939277  | 0.005831127 |
| 17200631 |               | -1.183605951 | 0.005831127 |
| 17388854 | Caprin1       | 0.583355685  | 0.005831353 |
| 17519088 | Adam10        | 0.537041992  | 0.00583981  |
| 17226473 | Tmem163       | 1.14174656   | 0.00583981  |
| 17547937 | 2310042E22Rik | 0.814146956  | 0.005841703 |
| 17444628 | LOC100045848  | 0.60573455   | 0.005841703 |
| 17344251 | Prrc2a        | -0.537004093 | 0.005841703 |
| 17300203 | Traj24        | -1.462608981 | 0.005841703 |
| 17283725 | Clmn          | 1.254825578  | 0.005843354 |
| 17348950 | Zfp397        | 0.638932071  | 0.005849424 |
| 17207281 |               | 1.055038236  | 0.005849424 |
| 17532367 | Hhatl         | -0.594726417 | 0.005851892 |
| 17241181 | Adamts14      | -1.069457072 | 0.005863414 |
| 17354386 | Cep120        | 0.541033472  | 0.005863414 |
| 17258813 | Tmc8          | -0.811056983 | 0.005863414 |
| 17323675 | Arvcf         | -0.73800963  | 0.005865079 |
| 17326816 | Gabpa         | 0.61011739   | 0.005865079 |
| 17374238 | Nop10         | 0.716533399  | 0.005865079 |
| 17550450 | Snhg1         | 0.591428757  | 0.005865079 |
| 17519967 | Tpbp          | 0.890707127  | 0.005865079 |
| 17234694 | Ube2g2        | 0.751261735  | 0.005865079 |
| 17389709 | Gpr176        | -0.623656061 | 0.00586948  |
| 17234172 | Gm15647       | -0.537184483 | 0.005871375 |
| 17460393 | Fam136a       | -0.569192123 | 0.005891393 |
| 17508968 | Frg1          | 0.683834952  | 0.005894041 |
| 17543356 | Gm19691       | 0.999246732  | 0.005894041 |
| 17290707 | Tbce          | 0.672038956  | 0.005894041 |
| 17206117 |               | -0.982545546 | 0.005894041 |
| 17288066 |               | -1.265659336 | 0.005894041 |
| 17315392 |               | 0.565450594  | 0.005894041 |
| 17233039 | Rtn4ip1       | 0.797499855  | 0.005899496 |
| 17344990 | Cenpq         | 0.751159885  | 0.005909432 |
| 17387316 | Nckap1        | 0.644641766  | 0.005909432 |
| 17512740 | Nob1          | 0.682438483  | 0.005909432 |
| 17226870 | Gm10188       | -0.696444606 | 0.005911006 |
| 17224620 | Chpf          | -0.492992779 | 0.005926155 |
| 17207439 |               | 1.965319935  | 0.005926155 |
| 17279167 | Eif5          | 0.905099961  | 0.005956212 |
| 17325159 | Mylk          | -1.468715206 | 0.005956212 |
| 17338982 | Vav1          | -1.093638347 | 0.005956212 |
| 17279168 |               | 0.905099961  | 0.005956212 |

|          |               |              |             |
|----------|---------------|--------------|-------------|
| 17495299 |               | 0.62434793   | 0.005956698 |
| 17497044 | Ikzf5         | 0.638085219  | 0.005958314 |
| 17309118 | Tbc1d4        | -0.772665918 | 0.005958314 |
| 17493358 | 4632434I11Rik | 1.281110664  | 0.00596128  |
| 17300129 | A630038E17Rik | 1.507658083  | 0.00596128  |
| 17462719 | Necap1        | 0.556848107  | 0.00596128  |
| 17233702 | Nodal         | -0.798163094 | 0.00596128  |
| 17512716 | Terf2         | 0.910872428  | 0.00596128  |
| 17231611 |               | -1.779830626 | 0.00596128  |
| 17214025 |               | -1.26792116  | 0.00596128  |
| 17312615 | Commd5        | 0.58362976   | 0.005964616 |
| 17250519 | Dhrs7b        | 0.754103025  | 0.005966115 |
| 17459236 | Mad2l1        | 0.622383495  | 0.005966115 |
| 17221191 | Snord87       | -0.592655402 | 0.005966115 |
| 17461954 | Tsen2         | 0.816010948  | 0.005966115 |
| 17318013 | Lynx1         | -0.662841066 | 0.00596632  |
| 17432927 | Fbxo44        | 0.557014915  | 0.005981415 |
| 17247593 | Gm12043       | -0.820114277 | 0.005981415 |
| 17293165 | Slc28a3       | 0.618204913  | 0.005981415 |
| 17361404 | Dpp3          | 0.848269828  | 0.005988921 |
| 17303738 | Ecd           | 0.580047125  | 0.005988921 |
| 17423373 | Fam92a        | 0.579199025  | 0.005988921 |
| 17529358 | Gm5619        | -0.794603025 | 0.005988921 |
| 17294860 | Msh3          | 0.6959071    | 0.005988921 |
| 17530703 | Parp3         | -0.657802705 | 0.005988921 |
| 17506631 | Tubb3         | 1.384772563  | 0.005988921 |
| 17206203 |               | -1.583835469 | 0.005988921 |
| 17202625 |               | -1.683447817 | 0.005988921 |
| 17528673 | Myzap         | 0.812957752  | 0.005991461 |
| 17311796 | Ndufb9        | 0.627007294  | 0.005991461 |
| 17360427 | Shoc2         | 0.525278077  | 0.006006144 |
| 17530457 | Atp2c1        | 0.917904418  | 0.006013271 |
| 17278852 | Mir382        | 0.976001091  | 0.006013414 |
| 17367334 | 4930426L09Rik | -0.782231743 | 0.006017196 |
| 17288302 | Rsl1          | 1.56723735   | 0.006018214 |
| 17425276 | Amd1          | 0.670557487  | 0.00601933  |
| 17464608 | Gm9835        | -0.738476091 | 0.00601933  |
| 17408422 | Man1a2        | 0.856317489  | 0.00601933  |
| 17233069 |               | 1.257077568  | 0.00601933  |
| 17410424 | Aimp1         | 0.490303155  | 0.006023679 |
| 17548973 | Pten          | 0.562186155  | 0.006023679 |
| 17325919 | Atg3          | 0.537255759  | 0.006023981 |
| 17267237 | Ints2         | 0.961879265  | 0.006026349 |

|          |          |              |             |
|----------|----------|--------------|-------------|
| 17505995 | Plcg2    | -0.912530875 | 0.006026349 |
| 17509851 | Zfp869   | 0.830434314  | 0.006026349 |
| 17391608 | ldh3b    | 0.680968242  | 0.006029219 |
| 17230301 | Gm16564  | -0.694863438 | 0.006049401 |
| 17549358 |          | -0.598768315 | 0.006054676 |
| 17549744 |          | -0.598768315 | 0.006054676 |
| 17291904 | Ssr1     | 0.55426659   | 0.006058034 |
| 17401902 | Col11a1  | -1.166705858 | 0.0060589   |
| 17261726 | Fbl1     | 0.720641686  | 0.0060589   |
| 17270583 | Nsf      | 0.815603018  | 0.006074624 |
| 17294761 | Xrcc4    | 0.610227341  | 0.006079039 |
| 17392937 | Sox12    | -0.759239436 | 0.006084384 |
| 17468926 | Aldh1l1  | -0.650872565 | 0.006092129 |
| 17372354 | Ssfa2    | -0.73147373  | 0.006096781 |
| 17203427 |          | 1.073539536  | 0.006096781 |
| 17233061 | Atg5     | 0.749909711  | 0.006098883 |
| 17238846 |          | -1.147858898 | 0.006106547 |
| 17273984 | Wdr35    | 0.796904106  | 0.006107301 |
| 17316700 | Azin1    | 0.694398745  | 0.006113186 |
| 17243382 | Gna15    | -0.720578639 | 0.006113186 |
| 17237004 |          | -1.029842024 | 0.006113186 |
| 17222193 | Ankrd23  | 0.725039651  | 0.006116399 |
| 17421394 | Gm13034  | 1.116333578  | 0.006116399 |
| 17550446 | Rian     | 0.583462793  | 0.006116399 |
| 17410227 | Ap1ar    | 0.773452525  | 0.006118411 |
| 17398863 | Hdgf     | 0.67491611   | 0.006122252 |
| 17376508 | Mir103-2 | 0.974729843  | 0.006122252 |
| 17488951 | Zfp146   | 0.882074252  | 0.006122252 |
| 17308474 |          | 0.611708694  | 0.006122252 |
| 17538829 |          | -0.897081937 | 0.006122252 |
| 17358011 |          | 1.04421214   | 0.006128043 |
| 17352882 | Gm7665   | -1.420468081 | 0.006131187 |
| 17493461 | Aqp11    | 0.879822533  | 0.006138012 |
| 17395041 | Bmp7     | 0.905650678  | 0.006142127 |
| 17292262 | Tpmt     | 0.643371724  | 0.006166501 |
| 17278713 | Mir136   | 1.565827857  | 0.00616835  |
| 17436345 | Depdc5   | 0.680441412  | 0.006169499 |
| 17229166 | Blzf1    | 0.625237023  | 0.006171347 |
| 17325991 | Gm15640  | -0.805008675 | 0.006171347 |
| 17213319 | Snord11  | -0.952069033 | 0.006171347 |
| 17281377 | Trappc6b | 0.537408794  | 0.006175089 |
| 17362689 | Sdhaf2   | 0.558515397  | 0.006180536 |
| 17288780 | Mctp1    | -1.071177861 | 0.006185166 |

|          |               |              |             |
|----------|---------------|--------------|-------------|
| 17395398 | C330013J21Rik | 1.181549795  | 0.006187474 |
| 17217639 | Lad1          | 1.118444629  | 0.006191648 |
| 17354730 | Slc26a2       | 0.844060967  | 0.006195237 |
| 17407979 | Vps45         | 0.5807736    | 0.006195237 |
| 17277212 | Zfp410        | 0.768536686  | 0.006195592 |
| 17409920 | Abcd3         | 0.530183563  | 0.006203705 |
| 17531958 | Stt3b         | 0.776592862  | 0.00620604  |
| 17550492 | Gm11974       | 0.87434972   | 0.006207398 |
| 17351932 | Pias2         | 0.81490205   | 0.006224459 |
| 17254188 | Sfn3          | 0.789276047  | 0.006224459 |
| 17453496 | Cldn4         | 1.04242558   | 0.006231444 |
| 17252800 | Mettl16       | 0.653638754  | 0.006231444 |
| 17387473 | Tmx2          | 0.558563704  | 0.006231444 |
| 17496973 | Ate1          | 0.626866765  | 0.006244691 |
| 17269839 | Coa3          | 0.824828067  | 0.006253286 |
| 17286796 | Gm5082        | 1.076958318  | 0.006253286 |
| 17278759 | Rian          | 1.276252347  | 0.006253286 |
| 17278715 | Rian          | 0.541564463  | 0.006254341 |
| 17209621 |               | -1.094099899 | 0.006255157 |
| 17384301 | Fbxw2         | 0.710825062  | 0.006258119 |
| 17358517 | Jak2          | 0.596928406  | 0.006258119 |
| 17209839 |               | -1.222292679 | 0.006267491 |
| 17536519 | Igfbp1        | 0.600346626  | 0.006269509 |
| 17416110 | Mier1         | 0.81850447   | 0.006272291 |
| 17542948 | Prrg1         | 0.847822452  | 0.006272291 |
| 17240484 | Cep57l1       | 0.678561893  | 0.006283211 |
| 17322842 | Ciita         | -0.798851933 | 0.006283211 |
| 17379938 | Cebpb         | -0.871498907 | 0.006287454 |
| 17541693 | Mir717        | -0.687215231 | 0.006287454 |
| 17550578 | ND5           | -0.783906025 | 0.006287454 |
| 17531207 | Ndufaf3       | 0.766631786  | 0.006287454 |
| 17551095 |               | -3.388880367 | 0.006287454 |
| 17341706 |               | 1.388271758  | 0.006287454 |
| 17534621 | Slc25a14      | 0.684256409  | 0.006297425 |
| 17329282 | Tra2b         | 0.486712214  | 0.006297425 |
| 17261608 | Gabrp         | 2.544919967  | 0.006299631 |
| 17323042 | Bfar          | 0.662254877  | 0.006304116 |
| 17503942 | Mt1           | 0.895614879  | 0.006304116 |
| 17499736 | Defa25        | -0.62700044  | 0.006305718 |
| 17459415 | Igk           | -1.029898205 | 0.006305718 |
| 17320614 | Kif21a        | 0.814693405  | 0.006321559 |
| 17402001 | Extl2         | 0.69201515   | 0.006326687 |
| 17524393 | Zfp426        | 0.864933458  | 0.006326687 |

|          |               |              |             |
|----------|---------------|--------------|-------------|
| 17248073 |               | 1.587691648  | 0.006326687 |
| 17201753 |               | -0.727741268 | 0.006326687 |
| 17201929 |               | -0.727741268 | 0.006326687 |
| 17224791 | Cul3          | 0.54081218   | 0.006335019 |
| 17281126 | Snx6          | 0.547577113  | 0.006335019 |
| 17466119 | Mkrn1         | 0.513197003  | 0.006342504 |
| 17538781 |               | -0.821006213 | 0.006342504 |
| 17312759 | Cyth4         | -1.091999163 | 0.006345298 |
| 17527727 | 2410076I21Rik | -0.77251692  | 0.006348668 |
| 17301890 | Med4          | 1.333408028  | 0.006348668 |
| 17274412 |               | 1.125822435  | 0.006348668 |
| 17301968 | Lcp1          | -0.973247602 | 0.006366409 |
| 17335818 | Slc37a1       | 0.761398886  | 0.006375609 |
| 17252626 | Tax1bp3       | 0.655442653  | 0.006375609 |
| 17243330 | Nfic          | -0.895788426 | 0.006382381 |
| 17495088 | Rnf141        | 0.888370573  | 0.006382381 |
| 17313998 | Creld2        | 0.891992415  | 0.006384128 |
| 17369841 | Fam102a       | 0.8228219    | 0.006384128 |
| 17228576 | Fam20b        | 0.582640605  | 0.006384128 |
| 17233720 | Ppa1          | 0.751036741  | 0.006384128 |
| 17370024 | Rpl12         | 0.682521334  | 0.006384128 |
| 17537375 |               | -1.184417178 | 0.006384128 |
| 17313433 | Xrcc6         | 0.637100532  | 0.006414316 |
| 17351878 | Zbtb7c        | -0.840289772 | 0.006414316 |
| 17540521 | Cfp           | -0.976570372 | 0.006415725 |
| 17532569 | Ccr1          | -0.887360576 | 0.00641816  |
| 17266946 | Ccl5          | 0.70936712   | 0.00642823  |
| 17280247 | Gm19924       | 1.077017998  | 0.00642823  |
| 17529713 | U2surp        | 0.579837732  | 0.006428525 |
| 17321217 | Olfr283       | -0.948625767 | 0.006438019 |
| 17476557 | Krtdap        | 2.217809638  | 0.006440778 |
| 17505718 | Pdpr          | 0.604672526  | 0.006440778 |
| 17221436 | Sbspon        | 0.696739042  | 0.006440778 |
| 17286344 | Wrnip1        | 0.687794281  | 0.006440778 |
| 17204131 |               | 1.653671236  | 0.006440778 |
| 17235835 | Gm8290        | -0.716092986 | 0.006442108 |
| 17467696 | 9130221F21Rik | -0.613254128 | 0.006452595 |
| 17256673 | Psme3         | 0.56435206   | 0.006452595 |
| 17405082 | Slc7a11       | 1.331584398  | 0.006452595 |
| 17538764 |               | -0.704879756 | 0.006452595 |
| 17345318 |               | 1.082376619  | 0.006458383 |
| 17495667 | Thumpd1       | 0.6713532    | 0.006469657 |
| 17544149 | Hmgn5         | 0.701992984  | 0.006469761 |

|          |               |              |             |
|----------|---------------|--------------|-------------|
| 17476752 | Rhpn2         | 1.087100721  | 0.006470918 |
| 17522848 | Azi2          | 0.649055881  | 0.006476236 |
| 17245188 | Frs2          | 0.669028973  | 0.006476236 |
| 17475209 |               | -0.857320905 | 0.006476236 |
| 17417090 | Trabd2b       | -0.974085566 | 0.006478386 |
| 17527977 | Glce          | 1.039433949  | 0.006479966 |
| 17383148 | Surf6         | 0.692579959  | 0.006487656 |
| 17285414 | Gli3          | -1.110351078 | 0.006491173 |
| 17356526 | Ltbp3         | -0.872419545 | 0.006491173 |
| 17464429 | Ccdc91        | 0.545646893  | 0.006494108 |
| 17300373 |               | 1.259182807  | 0.006495561 |
| 17205613 |               | -0.961042408 | 0.006495561 |
| 17222968 | Pms1          | 0.51767623   | 0.006497599 |
| 17393051 | 8430427H17Rik | -0.601562741 | 0.006502673 |
| 17465238 | Gpr37         | 0.863497887  | 0.006508334 |
| 17377778 | Id1           | 0.849406177  | 0.006508334 |
| 17444295 | Zfp12         | 0.993261528  | 0.006508334 |
| 17322475 |               | -0.860988258 | 0.006508334 |
| 17308746 | 1200011I18Rik | 0.624305833  | 0.006515824 |
| 17415570 | Hook1         | 0.669064916  | 0.006515824 |
| 17348450 |               | 0.723507888  | 0.006515824 |
| 17203559 |               | -0.750963623 | 0.006515824 |
| 17239845 | Arg1          | 1.264642695  | 0.006517938 |
| 17289728 | Depdc1b       | 0.761008666  | 0.006531216 |
| 17261730 | Rars          | 0.607896924  | 0.006531216 |
| 17333872 | Zfp160        | 0.879533251  | 0.006531216 |
| 17275029 | Ankmy2        | 0.735833349  | 0.006541749 |
| 17535152 | 4933402E13Rik | 1.304403271  | 0.006549197 |
| 17429933 | Zc3h12a       | -0.659039665 | 0.006549197 |
| 17475975 | Ech1          | 0.579822415  | 0.006549929 |
| 17344497 | Mrps18b       | 0.607063261  | 0.006549929 |
| 17319576 | Nhp211        | 0.574973024  | 0.006549929 |
| 17549928 | Sts           | -0.64311477  | 0.006549929 |
| 17500401 | Tti2          | 0.625140488  | 0.006549929 |
| 17383733 | BC005624      | 0.724626217  | 0.00656351  |
| 17218349 | Glul          | 0.924370501  | 0.006565981 |
| 17366812 |               | 1.126599754  | 0.006565981 |
| 17366848 |               | 1.126599754  | 0.006565981 |
| 17438882 | Gm9958        | 0.836463078  | 0.006572367 |
| 17336595 | Gpsm3         | -0.790904602 | 0.006579332 |
| 17246299 | Cdk2          | 1.600825303  | 0.006582319 |
| 17541339 | Gm4987        | 1.102374101  | 0.006582319 |
| 17315789 | Wdr70         | 0.669857317  | 0.006582319 |

|          |           |              |             |
|----------|-----------|--------------|-------------|
| 17320189 | Alg12     | 0.816643393  | 0.006596542 |
| 17291736 | Serpinb6c | 1.451000481  | 0.006605933 |
| 17485904 | Cox6b2    | -0.814104297 | 0.006615885 |
| 17514841 | Smco4     | 0.661701336  | 0.006625679 |
| 17442925 | Cct6a     | 0.561064533  | 0.006627684 |
| 17374632 | Knstrn    | 0.64354989   | 0.006627684 |
| 17353143 | Rprd1a    | 0.697432743  | 0.00663101  |
| 17409445 | Prpf38b   | 0.880303719  | 0.00663674  |
| 17257534 | Ddx42     | 0.70198357   | 0.006642178 |
| 17349607 | Psd2      | 0.840733158  | 0.006644138 |
| 17451769 | Prkab1    | 0.720692929  | 0.00664608  |
| 17438987 | Cxcl1     | -0.801310485 | 0.006653358 |
| 17525321 |           | -0.673123466 | 0.006653358 |
| 17312186 | Psca      | 0.955277491  | 0.006656307 |
| 17375694 | Dtwd1     | 0.776407964  | 0.006657421 |
| 17516594 | Slc37a4   | 0.774576892  | 0.006661327 |
| 17266534 | Ksr1      | -0.560071811 | 0.006663935 |
| 17272619 | Socs3     | 0.669605422  | 0.006663935 |
| 17551111 |           | -2.864800095 | 0.006663935 |
| 17204463 |           | 0.884179771  | 0.00667791  |
| 17514853 | Slc36a4   | 0.985449985  | 0.006686599 |
| 17327201 | Slc5a3    | 0.727350718  | 0.006691452 |
| 17449685 | Sdad1     | 0.605901823  | 0.00669345  |
| 17323322 | Yars2     | 0.812050729  | 0.006703917 |
| 17208433 |           | 1.008161614  | 0.006709551 |
| 17436151 | Gpn1      | 0.723473449  | 0.006714047 |
| 17489399 | Fxyd5     | -1.181792218 | 0.006716506 |
| 17317210 |           | 0.52928736   | 0.006716506 |
| 17422732 | Mxra8     | -0.94414886  | 0.006723169 |
| 17418749 | Smim12    | 0.634013062  | 0.006726392 |
| 17551107 |           | -2.83102178  | 0.006728112 |
| 17232534 | Frk       | 0.887701561  | 0.006738335 |
| 17268376 | Gm11523   | -0.637887988 | 0.006738335 |
| 17201205 |           | -1.160235076 | 0.006738335 |
| 17263877 | Prpsap2   | 0.663020354  | 0.006749013 |
| 17528663 | Polr2m    | 0.497569024  | 0.006758469 |
| 17401660 | Psma5     | -0.775840748 | 0.006762925 |
| 17334304 | Pkd1      | -0.795461746 | 0.0067632   |
| 17544373 | Pcdh19    | 0.534461128  | 0.006764186 |
| 17394772 |           | 1.423167893  | 0.006764777 |
| 17534135 | Sowahd    | -0.673000209 | 0.006766246 |
| 17534637 | Rbmx2     | 0.57795327   | 0.006767171 |
| 17206269 |           | -0.684724867 | 0.006769093 |

|          |               |              |             |
|----------|---------------|--------------|-------------|
| 17326318 | Abi3bp        | 1.290922433  | 0.006776779 |
| 17457775 | Trbj1-2       | -0.700792832 | 0.006791569 |
| 17208919 |               | 0.794296741  | 0.00680167  |
| 17299968 |               | -1.052949023 | 0.00680167  |
| 17470580 | Apobec1       | -1.10351271  | 0.006805382 |
| 17431166 | Lin28a        | 1.187920176  | 0.006805382 |
| 17501096 | Cldn24        | -1.312128926 | 0.006829461 |
| 17330506 | Gramd1c       | 0.89385999   | 0.006829461 |
| 17245223 | Lyz2          | -1.677879505 | 0.006829461 |
| 17395389 |               | -2.18252891  | 0.006829461 |
| 17279164 |               | 0.620310013  | 0.006829461 |
| 17282117 | Plek2         | 0.730333581  | 0.006831962 |
| 17316345 | 0610007N19Rik | -0.606608488 | 0.00683852  |
| 17403126 | Adh5          | 0.512776895  | 0.00683852  |
| 17301746 | Lgi3          | -0.6021744   | 0.00683852  |
| 17514988 | Zfp846        | 0.88854573   | 0.00683852  |
| 17233737 |               | 0.686989679  | 0.00683852  |
| 17528418 | Lactb         | 0.585709189  | 0.006842827 |
| 17250225 | Jmjd4         | 0.581753169  | 0.006851892 |
| 17416234 | Ppap2b        | 0.679091322  | 0.006851892 |
| 17287206 | Iars          | 0.829154404  | 0.006856659 |
| 17363704 | Rfx3          | 0.861034818  | 0.006857315 |
| 17247471 | C1d           | 0.512349559  | 0.006867228 |
| 17365658 | Xpnpep1       | 0.760887343  | 0.006867228 |
| 17520905 | Slco2a1       | 0.778164324  | 0.006877708 |
| 17439021 | Ereg          | 0.801905042  | 0.006896874 |
| 17358223 | Gm9493        | 0.531610427  | 0.006896874 |
| 17220417 | Susd4         | 0.814278215  | 0.006896874 |
| 17460994 | Fgd5          | -0.78916907  | 0.006898631 |
| 17238878 |               | -0.715589141 | 0.006903986 |
| 17368853 |               | -0.810378238 | 0.006903986 |
| 17242570 |               | 0.752263073  | 0.006905132 |
| 17280493 |               | 1.039399535  | 0.006917025 |
| 17454310 | Gpc2          | 0.899662084  | 0.006926427 |
| 17333962 | Gm10509       | 0.898953416  | 0.006928325 |
| 17325144 | Ccdc14        | 0.587877521  | 0.006930088 |
| 17452709 | Gpr81         | -0.637577744 | 0.006930088 |
| 17524107 | Panx1         | 0.896605411  | 0.006930088 |
| 17292922 | Ddx41         | 0.698461667  | 0.00693196  |
| 17319684 | Cyp2d37-ps    | -0.595233395 | 0.00693331  |
| 17450017 | Gm16227       | -0.475814709 | 0.00693331  |
| 17463478 | BC064078      | 0.699032369  | 0.006937097 |
| 17315763 | Egflam        | 0.931592018  | 0.006937097 |



|          |               |              |             |
|----------|---------------|--------------|-------------|
| 17223378 | Ppil3         | 0.577816962  | 0.006944092 |
| 17525296 | Barx2         | 0.963553682  | 0.006946902 |
| 17327255 | Cbr1          | 0.529697203  | 0.006946902 |
| 17425401 | Klf4          | 0.65866945   | 0.006946902 |
| 17353141 | Mir187        | -0.908798825 | 0.006946902 |
| 17285242 |               | -0.947260735 | 0.006950116 |
| 17274308 |               | -0.820493825 | 0.00695059  |
| 17214476 | Des           | -1.118013589 | 0.006951013 |
| 17233037 |               | -0.929080127 | 0.006957066 |
| 17437404 | Zcchc4        | 0.966778593  | 0.006963764 |
| 17276249 | Ppm1a         | 0.558030952  | 0.006974028 |
| 17201637 |               | -1.105477632 | 0.006976726 |
| 17412875 | 1700066J24Rik | -0.630906823 | 0.006983739 |
| 17446639 | 3110082J24Rik | -0.978596581 | 0.006983739 |
| 17244529 | 4930473O22Rik | -0.651065838 | 0.006983739 |
| 17498502 | Ccnd1         | -0.73300684  | 0.006983739 |
| 17332228 | Rcan1         | 0.885670174  | 0.006983739 |
| 17297072 | Rpp14         | 0.592825332  | 0.006983739 |
| 17422946 | Vmn1r3        | -0.660982319 | 0.006983739 |
| 17323075 |               | 0.768611715  | 0.006983739 |
| 17200097 |               | 2.233980937  | 0.006983739 |
| 17511112 | Ccdc130       | 0.996570536  | 0.007001826 |
| 17301086 | Sacs          | -0.596390036 | 0.007012211 |
| 17482484 | Uqcrc2        | 0.612402629  | 0.007015081 |
| 17480978 | Lamtor1       | -0.609144964 | 0.007016882 |
| 17351831 | Snord58b      | 1.238206253  | 0.007020243 |
| 17470445 | Atp6v1e1      | 0.560079923  | 0.007020632 |
| 17548757 |               | -0.706355613 | 0.007020632 |
| 17306189 | Hnrnpc        | 0.549348783  | 0.007024953 |
| 17282148 | Vti1b         | 0.514797492  | 0.007029049 |
| 17210367 |               | -1.151890274 | 0.007031386 |
| 17447615 | Nsg1          | 1.047993654  | 0.007035697 |
| 17508165 |               | 0.734759392  | 0.007037342 |
| 17255081 | Cox11         | 0.89054615   | 0.007058746 |
| 17521875 | Slc25a20      | 0.782320559  | 0.007058746 |
| 17366780 |               | 1.0052575    | 0.007058746 |
| 17463597 | 5430401F13Rik | -0.669915499 | 0.00706009  |
| 17506661 | Afg3l1        | 0.684525973  | 0.00706009  |
| 17310669 |               | -0.967810836 | 0.00706009  |
| 17308475 |               | 0.731254513  | 0.007064952 |
| 17441622 | n-R5s176      | -1.006919823 | 0.007066241 |
| 17546222 | Tmlhe         | 0.972353872  | 0.007066241 |
| 17357887 | Olf1444       | -0.936859398 | 0.007082104 |

|          |          |              |             |
|----------|----------|--------------|-------------|
| 17545947 | Siah1b   | 0.983046264  | 0.007082104 |
| 17233613 | Spock2   | 0.691174251  | 0.007082104 |
| 17350086 |          | -0.707343082 | 0.007082104 |
| 17379503 | Dnttip1  | 0.501862976  | 0.007088409 |
| 17534555 | Sash3    | -0.750505946 | 0.007088409 |
| 17547505 | Col6a1   | -1.228064774 | 0.007093955 |
| 17550625 |          | -0.724160193 | 0.007108472 |
| 17351760 | Myo5b    | 0.675271634  | 0.007112329 |
| 17467205 | Nap115   | 1.193280335  | 0.007120216 |
| 17294518 | Ankrd32  | 0.579668505  | 0.007120348 |
| 17400759 | Acp6     | 0.572162078  | 0.007122864 |
| 17215251 | Gigyf2   | 0.707077087  | 0.007122864 |
| 17300071 | Trav16   | -1.148565363 | 0.007122864 |
| 17229533 | Gm7694   | -0.572310052 | 0.007127612 |
| 17209881 |          | 1.40546834   | 0.007129765 |
| 17228544 | Soat1    | 0.739407547  | 0.007168403 |
| 17406421 | Arfp1    | 0.767459672  | 0.007170377 |
| 17205411 |          | -1.13294692  | 0.007170377 |
| 17421168 |          | -1.407631729 | 0.007178906 |
| 17398460 | Map9     | 0.698956522  | 0.007181604 |
| 17359574 |          | -0.861072439 | 0.007197876 |
| 17517001 | Usp28    | 0.860778896  | 0.007209369 |
| 17345152 | Cdc5l    | 0.636915287  | 0.007218585 |
| 17510261 | Gm17576  | 1.387193519  | 0.007226567 |
| 17533462 | Gm5382   | -0.56123835  | 0.007226567 |
| 17432514 | Oog3     | -0.886934111 | 0.007226567 |
| 17248068 |          | 2.009436614  | 0.007226567 |
| 17457790 | Tcrb-J   | -1.501713264 | 0.007227328 |
| 17315395 |          | 0.701515362  | 0.007227328 |
| 17468469 | Dusp11   | 0.511178462  | 0.007234228 |
| 17311428 | Ebag9    | 0.685545904  | 0.007234228 |
| 17239401 | Pex3     | 0.499015478  | 0.007234228 |
| 17226194 | Ralb     | 0.777913111  | 0.007234228 |
| 17245665 | Xrcc6bp1 | 0.746188364  | 0.007234228 |
| 17454944 | Tecpr1   | -0.646717186 | 0.007247072 |
| 17449731 | Nup54    | 0.794952824  | 0.007265888 |
| 17408985 | Prok1    | -0.614962063 | 0.007265888 |
| 17274249 | Pdia6    | 0.619507397  | 0.007267465 |
| 17528014 | Fem1b    | 0.652780694  | 0.007268226 |
| 17365163 |          | 0.725166951  | 0.007270163 |
| 17349554 | Matr3    | 0.466579319  | 0.007270263 |
| 17403439 | Ddah1    | 0.561064235  | 0.007271127 |
| 17416685 |          | 1.579952039  | 0.007272389 |

|          |               |              |             |
|----------|---------------|--------------|-------------|
| 17207589 |               | 0.845045818  | 0.00727481  |
| 17440054 | A830010M20Rik | 0.772355628  | 0.007275689 |
| 17277754 | n-R5s65       | -0.892445527 | 0.007279896 |
| 17252231 | Rabep1        | 0.476177487  | 0.007294243 |
| 17267775 | Utp18         | 0.795457352  | 0.007296066 |
| 17264906 | Polr2a        | -0.630742712 | 0.007315246 |
| 17454766 | Rnf216        | 0.609121813  | 0.007315246 |
| 17464251 | 2010013B24Rik | -0.516123866 | 0.007318116 |
| 17384082 | Slc2a8        | -0.558647369 | 0.007329407 |
| 17302354 |               | -0.596635993 | 0.007330002 |
| 17203905 |               | 1.024021946  | 0.007330002 |
| 17266370 | Snord4a       | 1.060946552  | 0.007331492 |
| 17341702 |               | 0.625569047  | 0.007331492 |
| 17531932 | Cmtm8         | 0.660216232  | 0.007344228 |
| 17467545 |               | -0.899176308 | 0.007344228 |
| 17482366 | Tmem159       | 0.701410489  | 0.007345398 |
| 17409386 | Gpsm2         | 0.538509204  | 0.007346009 |
| 17225993 | Rnf152        | 0.727894631  | 0.007346009 |
| 17431619 | C1qa          | -1.263462001 | 0.00734885  |
| 17249950 | Cnot8         | 0.574803489  | 0.00734885  |
| 17501094 | n-R5s96       | -1.058617882 | 0.00734885  |
| 17203883 |               | 0.992845709  | 0.00734885  |
| 17206447 |               | -1.04121782  | 0.00734885  |
| 17501208 |               | -1.062428375 | 0.00734885  |
| 17235947 | D10Wsu102e    | 0.850496538  | 0.007351137 |
| 17513281 | Gm16118       | -0.817236218 | 0.007351137 |
| 17224291 | Usp37         | 0.746461012  | 0.007351137 |
| 17353183 | Celf4         | 0.812802142  | 0.007359956 |
| 17245798 | Kif5a         | 0.997182932  | 0.007359956 |
| 17550596 | mt-Ta         | 1.063218817  | 0.007359956 |
| 17310452 | Golph3        | 0.564648047  | 0.007373597 |
| 17404941 | 5430434I15Rik | -1.087984537 | 0.007380043 |
| 17389324 | Emc4          | 0.577261806  | 0.007380043 |
| 17501588 | Sh2d4a        | 0.674581167  | 0.007380391 |
| 17374722 | Rad51         | 0.598438056  | 0.007391467 |
| 17381772 |               | -0.887226235 | 0.007391467 |
| 17482733 |               | 1.040322713  | 0.007391467 |
| 17436574 | Rnf4          | 0.64483057   | 0.00739302  |
| 17335017 | Syngap1       | -0.829097528 | 0.00739302  |
| 17415236 | Gm12631       | -0.782737643 | 0.007395379 |
| 17296115 | Rab3c         | 1.061222998  | 0.007395379 |
| 17514826 | Taf1d         | 0.823796631  | 0.007395379 |
| 17518644 | Csnk1g1       | 0.682989407  | 0.007404137 |

|          |               |              |             |
|----------|---------------|--------------|-------------|
| 17518991 | Bnip2         | 0.677020831  | 0.007405575 |
| 17283936 |               | 1.231155143  | 0.007405575 |
| 17202093 |               | -1.227911382 | 0.007407478 |
| 17226387 | Dpp10         | 0.917750077  | 0.007415817 |
| 17258155 | Otop2         | -0.684598443 | 0.007416805 |
| 17379683 | Slc2a10       | -0.633503102 | 0.007416805 |
| 17538813 |               | -1.096835859 | 0.007416805 |
| 17205775 |               | 0.827970289  | 0.007419677 |
| 17523705 | Gria4         | 0.669072     | 0.007431504 |
| 17525363 | Foxred1       | 0.864651206  | 0.007435783 |
| 17482332 | 2610020H08Rik | 0.666542204  | 0.007439422 |
| 17381283 | Prpf18        | 0.64600501   | 0.007441172 |
| 17342897 | Srpk1         | 0.657378915  | 0.007451396 |
| 17247039 | Aebp1         | -0.816345849 | 0.007451899 |
| 17538222 | Col4a5        | -1.114040847 | 0.007461035 |
| 17394795 | Kcng1         | 0.753475479  | 0.007472056 |
| 17489571 | Scgb2b27      | -0.794584713 | 0.007472056 |
| 17469786 |               | -1.232285492 | 0.007472056 |
| 17538785 |               | -0.876606249 | 0.007472056 |
| 17449628 |               | 0.686012422  | 0.007472056 |
| 17273899 | 1110057K04Rik | 0.698192497  | 0.007472153 |
| 17440633 | Mn1           | -0.711343155 | 0.007472153 |
| 17478435 | Ano5          | -0.632524225 | 0.007480822 |
| 17241623 | Reep3         | 0.890033787  | 0.007495731 |
| 17495300 |               | 0.870521824  | 0.007495817 |
| 17349365 |               | -1.423749283 | 0.007500816 |
| 17360675 | Trub1         | 0.566924761  | 0.007503373 |
| 17270682 | 1700052K11Rik | 0.675070662  | 0.007512218 |
| 17418857 | Phc2          | -0.488751108 | 0.007512218 |
| 17216809 | Rab3gap1      | 0.606226741  | 0.007525557 |
| 17284408 |               | -1.12940848  | 0.007528606 |
| 17300984 | Cab39l        | 0.602466577  | 0.007552397 |
| 17375257 | Ckmt1         | 0.700768398  | 0.007552397 |
| 17524895 | Elavl3        | 1.328923788  | 0.007552397 |
| 17500532 | Gm4889        | -1.042911694 | 0.007552397 |
| 17331533 | Hspa13        | 0.803833649  | 0.007552397 |
| 17366511 | Phyh          | 0.575400533  | 0.007552397 |
| 17492237 |               | -0.626795877 | 0.007552397 |
| 17208475 |               | -1.619400372 | 0.007555476 |
| 17397990 | Mme           | 1.07611091   | 0.007555639 |
| 17356344 | Brms1         | 0.624088858  | 0.007557671 |
| 17357910 | Olfr1463      | -1.081920946 | 0.007587794 |
| 17226232 | Ptpn4         | 0.615044466  | 0.007592877 |

|          |               |              |             |
|----------|---------------|--------------|-------------|
| 17393549 | Gm14169       | -0.708795998 | 0.007594813 |
| 17255534 | Hoxb13        | -0.703515977 | 0.007594813 |
| 17484014 | Acadsb        | 0.612860766  | 0.007595633 |
| 17242326 | Gm19668       | -0.657830963 | 0.007595633 |
| 17549232 |               | -0.766467653 | 0.007610766 |
| 17450049 | Tmem150c      | 0.705730906  | 0.00761776  |
| 17493689 | Slco2b1       | -0.645654447 | 0.007633321 |
| 17491853 | Tjp1          | 0.588828541  | 0.007641373 |
| 17495677 | Eri2          | 0.655614587  | 0.007645389 |
| 17202217 |               | 1.323379856  | 0.007649087 |
| 17296572 | Gm3558        | 0.767187289  | 0.00765156  |
| 17234363 | 4933407G14Rik | -1.001611758 | 0.0076574   |
| 17526464 | Cd3e          | -0.635746366 | 0.0076574   |
| 17414554 | Prpf4         | 0.805935422  | 0.007661958 |
| 17350740 | Lmnb1         | 0.81520384   | 0.007662022 |
| 17357413 | Gm6445        | 1.003606084  | 0.007671227 |
| 17487325 | Relb          | -0.538312808 | 0.007685649 |
| 17389481 | Arhgap11a     | 0.923899352  | 0.007694841 |
| 17353541 | Etf1          | 0.65852924   | 0.007694841 |
| 17264046 | Fam211a       | -0.517829105 | 0.007694841 |
| 17319989 | Ldoc1l        | 0.932917732  | 0.007694841 |
| 17412534 | Lym2          | 0.829070402  | 0.007694841 |
| 17550100 | Mir669a-1     | 1.143946416  | 0.007694841 |
| 17550102 | Mir669a-1     | 1.143946416  | 0.007694841 |
| 17550104 | Mir669a-1     | 1.143946416  | 0.007694841 |
| 17550106 | Mir669a-1     | 1.143946416  | 0.007694841 |
| 17550108 | Mir669a-1     | 1.143946416  | 0.007694841 |
| 17550110 | Mir669a-1     | 1.143946416  | 0.007694841 |
| 17550112 | Mir669a-1     | 1.143946416  | 0.007694841 |
| 17550114 | Mir669a-1     | 1.143946416  | 0.007694841 |
| 17550116 | Mir669a-1     | 1.143946416  | 0.007694841 |
| 17550118 | Mir669a-1     | 1.143946416  | 0.007694841 |
| 17550120 | Mir669a-1     | 1.143946416  | 0.007694841 |
| 17550122 | Mir669a-1     | 1.143946416  | 0.007694841 |
| 17550128 | Mir669a-1     | 1.143946416  | 0.007694841 |
| 17357790 | Olfr235       | -0.643706699 | 0.007694841 |
| 17238394 | Pan2          | 0.974813905  | 0.007694841 |
| 17407764 | Prune         | 0.63971308   | 0.007694841 |
| 17523161 | Slc25a38      | 0.562750911  | 0.007694841 |
| 17378856 | Snhg11        | -0.664333439 | 0.007694841 |
| 17525653 | Spa17         | 0.713967832  | 0.007694841 |
| 17484101 |               | 0.535889146  | 0.007694841 |
| 17468529 |               | 0.796968696  | 0.007694841 |

|          |               |              |             |
|----------|---------------|--------------|-------------|
| 17204011 |               | -0.831507642 | 0.007704841 |
| 17548717 | Gm3601        | -0.939179653 | 0.007706723 |
| 17473091 | Amn1          | 0.679412322  | 0.007707229 |
| 17368387 |               | -1.738339623 | 0.007707229 |
| 17479911 |               | -1.012342479 | 0.007707229 |
| 17309535 |               | 0.534177371  | 0.00770725  |
| 17513297 | Cdyl2         | -0.639559568 | 0.007708842 |
| 17445543 | Crot          | 0.738771614  | 0.007708927 |
| 17546101 | Tlr8          | -1.116262478 | 0.007708927 |
| 17423923 | 3110043O21Rik | 0.644171256  | 0.007711431 |
| 17454408 | 3110082I17Rik | 0.552281045  | 0.007711431 |
| 17262812 | 4933405E24Rik | -0.655381876 | 0.007711431 |
| 17405513 | Dhx36         | 0.645580391  | 0.007711431 |
| 17211087 | Gm15818       | -0.682614871 | 0.007711431 |
| 17520971 | Gm16252       | -0.62790218  | 0.007711431 |
| 17548238 | Gm3601        | -0.871425024 | 0.007711431 |
| 17467430 | Igkv4-72      | -0.950415876 | 0.007711431 |
| 17511389 | Itfg1         | 0.5229115    | 0.007711431 |
| 17324583 | Opa1          | 0.523525543  | 0.007711431 |
| 17391971 | Pcna          | 0.480613102  | 0.007711431 |
| 17241582 | Sirt1         | 0.661984296  | 0.007711431 |
| 17241765 | Tfam          | 0.68227736   | 0.007711431 |
| 17272605 | Tha1          | -0.510916141 | 0.007711431 |
| 17251516 |               | -0.760138821 | 0.007711431 |
| 17421997 |               | -0.707650226 | 0.007711431 |
| 17238482 | Rnf41         | 0.585811278  | 0.00771513  |
| 17351913 | Skor2         | 0.625126375  | 0.00771513  |
| 17221662 | Tram2         | 0.725502714  | 0.00771513  |
| 17345321 | Polh          | 1.100208125  | 0.007715929 |
| 17326250 | Zbtb11        | 0.604783458  | 0.00772258  |
| 17486489 | Zscan4d       | -0.615920606 | 0.007729557 |
| 17366141 | Prdx3         | 0.589617554  | 0.007736109 |
| 17239597 | Tnfaip3       | 0.555356249  | 0.00774275  |
| 17439184 | Ccng2         | 0.552516555  | 0.007746402 |
| 17365511 | Col17a1       | 0.844374006  | 0.007746402 |
| 17322473 |               | -0.591941007 | 0.007756438 |
| 17369679 | Prrc2b        | -0.717934123 | 0.007772698 |
| 17486216 | Vmn2r32       | -0.499876152 | 0.007791344 |
| 17291131 | Abt1          | 0.702077003  | 0.00779866  |
| 17427814 | Ttc4          | 0.666574145  | 0.007804533 |
| 17361580 | Tsga10ip      | -0.762308956 | 0.007808691 |
| 17210505 |               | 1.748769063  | 0.007818366 |
| 17495304 |               | 0.747333267  | 0.007818366 |

|          |               |              |             |
|----------|---------------|--------------|-------------|
| 17251898 | Mir324        | -0.84936717  | 0.007820167 |
| 17290031 |               | -0.696594325 | 0.007820167 |
| 17293841 |               | -0.684467549 | 0.007820167 |
| 17235694 | Tbxa2r        | -0.610499593 | 0.007831651 |
| 17506571 | Zfp276        | 0.501781988  | 0.007831651 |
| 17279152 |               | 0.664615065  | 0.007831651 |
| 17371059 | March7        | 0.545192319  | 0.007841348 |
| 17551147 |               | -1.465962806 | 0.007841348 |
| 17329692 | Lsg1          | 0.624297273  | 0.007843845 |
| 17476872 | 1600014C10Rik | 0.642007923  | 0.007847283 |
| 17458692 | Chn2          | 0.940603793  | 0.007847283 |
| 17286707 | Gcnt2         | 0.867907695  | 0.007847283 |
| 17408024 | Fcgr1         | -0.999015367 | 0.007866514 |
| 17210447 |               | -0.588935902 | 0.007879367 |
| 17363572 | Tjp2          | 1.147220189  | 0.007879724 |
| 17296355 | ltga2         | 0.55652367   | 0.007884085 |
| 17468712 |               | 1.152041715  | 0.007884085 |
| 17262013 | Gm12158       | -0.528852354 | 0.00788773  |
| 17519282 | Rab27a        | 0.872271607  | 0.007896218 |
| 17207275 |               | 1.304322087  | 0.007896218 |
| 17535018 | Htatsf1       | 0.822024219  | 0.007901532 |
| 17459297 |               | -0.537518191 | 0.007911313 |
| 17210531 |               | -1.267754455 | 0.007912489 |
| 17396334 | Rprl2         | -1.075323924 | 0.007918351 |
| 17262277 | Cnot6         | 0.637521775  | 0.007929928 |
| 17274540 | Rrm2          | 0.774288009  | 0.007929928 |
| 17538787 |               | -0.578695325 | 0.007929928 |
| 17321823 | Krt80         | 0.690686726  | 0.007931885 |
| 17289085 | Dhfr          | 0.624668568  | 0.007933712 |
| 17223985 | Ikzf2         | 0.917579305  | 0.007935002 |
| 17381911 | Nsun6         | 1.066481979  | 0.007941559 |
| 17528800 | Unc13c        | -0.925623675 | 0.007941559 |
| 17223353 | Clk1          | 0.958807813  | 0.007943286 |
| 17526305 |               | -1.677650499 | 0.007957434 |
| 17507462 | Ankrd10       | 0.71192719   | 0.007960875 |
| 17313091 | Smcr7l        | 0.903407528  | 0.007960875 |
| 17209715 |               | 1.229371504  | 0.007960875 |
| 17413649 | Dcaf10        | 0.656516716  | 0.00796635  |
| 17271984 | Slc25a19      | 0.788533339  | 0.007974294 |
| 17517031 | Zw10          | 0.707670551  | 0.007985853 |
| 17517416 | Crabp1        | 1.531678796  | 0.007987809 |
| 17403025 | LOC637657     | 0.737613272  | 0.007987809 |
| 17348054 | Mettl4        | 0.631580474  | 0.007987809 |

|          |               |              |             |
|----------|---------------|--------------|-------------|
| 17367531 | Mir3967       | 0.764011952  | 0.007987809 |
| 17542070 | Mir883b       | -0.767054362 | 0.007987809 |
| 17361915 | Mrpl49        | 0.928683218  | 0.007987809 |
| 17391434 |               | -0.7776708   | 0.007987809 |
| 17211396 | Tmem14a       | 0.795346722  | 0.007987946 |
| 17520932 | Topbp1        | 0.805206006  | 0.007988441 |
| 17282019 | Mir5135       | -0.90008192  | 0.007991019 |
| 17248380 | Lcp2          | -1.28366976  | 0.008076444 |
| 17523985 | 4930568E12Rik | -0.832102537 | 0.008083981 |
| 17437963 | C330024D21Rik | 1.12155716   | 0.008083981 |
| 17497058 | Cpxm2         | 1.063061534  | 0.008083981 |
| 17426915 | Gm10154       | 0.778253185  | 0.008083981 |
| 17241013 | Mcu           | 0.887019698  | 0.008084812 |
| 17362904 | Ms4a13        | -0.631252528 | 0.008084812 |
| 17453304 | Gtf2i         | -0.690150868 | 0.008086003 |
| 17224071 | Fn1           | -0.662536941 | 0.008098865 |
| 17376124 | Slc20a1       | 0.825117245  | 0.00810979  |
| 17209019 |               | 0.882499967  | 0.00810979  |
| 17454049 | Gnb2          | -0.541262596 | 0.008113277 |
| 17527373 | Scaper        | 0.834404446  | 0.00811602  |
| 17366936 | Mir466l       | 1.185117728  | 0.008120555 |
| 17445193 | Pds5b         | 0.65091863   | 0.008120555 |
| 17491642 | Snord107      | 1.056998901  | 0.008120555 |
| 17238874 |               | -0.876531139 | 0.008120555 |
| 17412860 | Ubap1         | 0.729353926  | 0.00813891  |
| 17231066 | Dtl           | 0.726760223  | 0.008143817 |
| 17332166 | Donson        | 0.979406262  | 0.008146053 |
| 17449456 | Grsf1         | 0.520837972  | 0.008146053 |
| 17464238 | Lym5          | 0.552285467  | 0.008149217 |
| 17392578 | Napb          | 1.597328371  | 0.008149217 |
| 17307433 | Tnfrsf19      | 0.97766178   | 0.008149217 |
| 17384983 |               | -0.749710906 | 0.008149217 |
| 17408384 | Wdr3          | 0.690689755  | 0.00814934  |
| 17269921 | Brca1         | 0.82140491   | 0.008175314 |
| 17210657 |               | -1.453182312 | 0.008175314 |
| 17329105 | Abcc5         | 0.718564307  | 0.008182039 |
| 17469473 | Shq1          | 0.877034075  | 0.008184258 |
| 17255352 | Dlx3          | 0.736283936  | 0.00819736  |
| 17203079 |               | 1.677120713  | 0.00819736  |
| 17205791 |               | -0.882446582 | 0.008202464 |
| 17493292 | Tmem126a      | 0.706785875  | 0.008207661 |
| 17286670 | Snrnp48       | 0.589931876  | 0.008210756 |
| 17315570 | Nckap1l       | -1.30868655  | 0.008213442 |



|          |               |              |             |
|----------|---------------|--------------|-------------|
| 17407850 | Ecm1          | -0.832156972 | 0.008216854 |
| 17487805 | Atp1a3        | 1.303183455  | 0.008216886 |
| 17354589 | Gm4841        | -0.673502451 | 0.008223259 |
| 17547702 | Tmx1          | 0.661005642  | 0.008223259 |
| 17337491 | Znrd1as       | 1.071120564  | 0.008223259 |
| 17538809 |               | -1.512040046 | 0.008223259 |
| 17495303 |               | 0.743713249  | 0.008223259 |
| 17385719 | Dpp4          | 1.326288288  | 0.008225031 |
| 17550687 |               | -1.064622611 | 0.008225446 |
| 17464210 | Lrmp          | -0.607307522 | 0.0082384   |
| 17235843 | AU041133      | 0.622424759  | 0.008260497 |
| 17521673 | Rhoa          | 0.469887563  | 0.008260497 |
| 17539548 | Piga          | 0.784803635  | 0.008261158 |
| 17467144 | Vmn1r7        | -0.844288538 | 0.008261158 |
| 17249726 | Rapgef6       | 0.670452869  | 0.008273115 |
| 17494101 | Trim21        | 0.537039436  | 0.008277341 |
| 17514936 | Zfp317        | 0.932651537  | 0.008278025 |
| 17500814 | Triml2        | 0.9442422    | 0.008278546 |
| 17465484 | Ube2h         | -0.551212777 | 0.008283129 |
| 17498663 | C330021F23Rik | 0.787763943  | 0.008284606 |
| 17221490 | Ube2w         | 0.585838164  | 0.008289157 |
| 17256632 | Wnk4          | 0.685330641  | 0.008301748 |
| 17368373 | Rpl7a         | 0.72099103   | 0.008316647 |
| 17549254 | A530079E22Rik | -0.544855891 | 0.008322227 |
| 17549326 | A530079E22Rik | -0.544855891 | 0.008322227 |
| 17457892 | Casp2         | 0.973103017  | 0.008322227 |
| 17427563 | Itgb3bp       | 0.649014126  | 0.008322227 |
| 17358891 | Pcgf5         | 1.020182782  | 0.008322227 |
| 17222679 | Tex30         | 0.64467761   | 0.008322227 |
| 17470616 | C3ar1         | -1.12865141  | 0.008322717 |
| 17304246 | Appl1         | 0.499843099  | 0.008326608 |
| 17287794 | Gm10782       | -0.525576739 | 0.008329045 |
| 17526776 | Ncam1         | -0.980405901 | 0.008329045 |
| 17406760 | Sema4a        | 0.691601883  | 0.008329045 |
| 17319801 | A4galt        | 0.87402867   | 0.008333239 |
| 17482160 | Ccp110        | 0.766985708  | 0.008333239 |
| 17339801 | Crim1         | 0.512107272  | 0.008333239 |
| 17291964 | Eef1e1        | 0.61869745   | 0.008333239 |
| 17279962 | Gen1          | 0.797688799  | 0.008333239 |
| 17528546 | Gm19304       | -0.696705454 | 0.008333239 |
| 17488073 | Gm4613        | -0.685215697 | 0.008333239 |
| 17327972 | n-R5s30       | -1.218966767 | 0.008333239 |
| 17545420 | Ribc1         | 0.841611789  | 0.008333239 |

|          |               |              |             |
|----------|---------------|--------------|-------------|
| 17284447 |               | -1.052532781 | 0.008333239 |
| 17210849 |               | -1.27392647  | 0.008333239 |
| 17309557 | Slc15a1       | 0.894665476  | 0.008346469 |
| 17513380 | Sdr42e1       | 0.760946527  | 0.008357007 |
| 17261035 | Ahsa2         | 0.662001356  | 0.008360631 |
| 17540420 | Fundc1        | 0.75038081   | 0.008363536 |
| 17212821 | Ormdl1        | 0.680199751  | 0.008363536 |
| 17229729 | Nit1          | 0.608904475  | 0.008374023 |
| 17248426 | Slit3         | -0.884359173 | 0.008374023 |
| 17201099 |               | 1.453459072  | 0.008374023 |
| 17514399 | Gucy1a2       | -0.58701053  | 0.008378055 |
| 17260357 | H2afv         | 0.62488472   | 0.008379555 |
| 17402155 | Cnn3          | 0.480664555  | 0.008389518 |
| 17531900 | Cnot10        | 0.612940094  | 0.008390341 |
| 17517289 | Exph5         | 0.619883455  | 0.008396606 |
| 17369296 | Tor1b         | 0.771315369  | 0.008399372 |
| 17279150 |               | 0.572281535  | 0.008415092 |
| 17506356 | Zfpm1         | -0.851686948 | 0.008421296 |
| 17310187 | Nadk2         | 0.722035112  | 0.008456204 |
| 17486173 | Clcn4-2       | 0.843792532  | 0.008459288 |
| 17381235 | Hspa14        | 0.594667372  | 0.008467952 |
| 17388212 | Gm17281       | -0.745989977 | 0.008472321 |
| 17495988 | Arhgap17      | 0.598432461  | 0.008485528 |
| 17398611 | Pet112        | 0.487989079  | 0.008485528 |
| 17203331 |               | 0.920887422  | 0.008485528 |
| 17548137 | Gm16495       | -0.664340633 | 0.008486996 |
| 17206455 |               | -1.765806491 | 0.008488308 |
| 17303088 | Gm6337        | 1.189665141  | 0.008496953 |
| 17530798 | Rbm15b        | -0.616086785 | 0.008500032 |
| 17273140 | Gm11788       | -0.562833899 | 0.008501121 |
| 17221184 |               | -0.659642995 | 0.008501121 |
| 17376183 | Stk35         | 0.590336779  | 0.008506446 |
| 17447868 | Tapt1         | 0.680796457  | 0.008506446 |
| 17426791 | Zdhhc21       | 0.577553377  | 0.008506446 |
| 17479354 | Abhd2         | 0.675568077  | 0.008507235 |
| 17312997 | Gm16059       | -0.579791142 | 0.008507235 |
| 17248635 | Pwwp2a        | 0.626878546  | 0.008515974 |
| 17427164 | Elavl2        | 0.554842525  | 0.008530643 |
| 17232187 | Taar7b        | -0.531414306 | 0.008530643 |
| 17208363 |               | -0.957259777 | 0.008530643 |
| 17380464 | 2210418O10Rik | 0.686932328  | 0.008530684 |
| 17344387 | Gtf2h4        | 0.607826763  | 0.00854448  |
| 17450157 | Helq          | 0.55249407   | 0.00854504  |

|          |               |              |             |
|----------|---------------|--------------|-------------|
| 17297537 | Plau          | -0.9000829   | 0.008545749 |
| 17404071 |               | -0.606978124 | 0.008545749 |
| 17370575 | Gm13476       | -0.815293222 | 0.008545967 |
| 17515675 | Gm15606       | -0.533452404 | 0.008545967 |
| 17204577 |               | 1.175372278  | 0.008550062 |
| 17441526 | 2410131K14Rik | 0.486411308  | 0.008562105 |
| 17257058 |               | 0.566677204  | 0.008569445 |
| 17530233 | Srprb         | 0.629445949  | 0.008571119 |
| 17304794 | Hacl1         | 0.507580757  | 0.008576311 |
| 17302586 | Gm4664        | -0.631882203 | 0.008589009 |
| 17526707 | Zbtb16        | 0.797060376  | 0.008598808 |
| 17206497 |               | 1.451647061  | 0.008598808 |
| 17522280 | Gm10615       | 0.7125501    | 0.008600277 |
| 17413403 | Npr2          | -0.747101405 | 0.008600277 |
| 17203223 |               | 1.103341952  | 0.008601742 |
| 17300231 | Traj8         | -0.837987143 | 0.008604918 |
| 17498947 | 4833411C07Rik | -0.594909004 | 0.008617017 |
| 17277300 | D030025P21Rik | -0.711342914 | 0.008617017 |
| 17206687 |               | 0.820091472  | 0.008624988 |
| 17413206 | 1700022I11Rik | -0.565562778 | 0.00863265  |
| 17381256 | Gm13185       | -0.664249135 | 0.00863265  |
| 17518298 | Rpl4          | 0.448075396  | 0.00863265  |
| 17223685 | Ndufs1        | 0.63183956   | 0.008634813 |
| 17230916 | Pdcd5         | 0.503933911  | 0.008634813 |
| 17262798 | Pdlim4        | -0.585674938 | 0.008634813 |
| 17520638 | Copb2         | 0.581123876  | 0.00863785  |
| 17355558 | Siglec15      | -0.579674592 | 0.008644222 |
| 17353171 | Gm9960        | 0.533371204  | 0.008645575 |
| 17479892 | Hnrnpk        | 0.443744081  | 0.008645575 |
| 17328933 | Mir185        | -0.699942471 | 0.008650518 |
| 17303695 | 2700060E02Rik | 0.531493411  | 0.008656266 |
| 17238638 | Olf9          | -0.989662822 | 0.008657024 |
| 17549548 | Cmas          | 0.872925756  | 0.008659045 |
| 17549704 | Cmas          | 0.872925756  | 0.008659045 |
| 17533469 | Cypt1         | -1.658658171 | 0.008659045 |
| 17472530 | Kcnj8         | 0.636285852  | 0.008660355 |
| 17493685 | Gm4980        | 0.992366173  | 0.008662467 |
| 17547594 | Gh            | -0.635970044 | 0.008706603 |
| 17530231 | Rab6b         | 0.90753867   | 0.008706603 |
| 17443114 | Rfc2          | 0.699088581  | 0.008706603 |
| 17543290 | Arhgef9       | 0.855995701  | 0.008724673 |
| 17436171 | Slc4a1ap      | 0.503251512  | 0.008731969 |
| 17530291 | 1300017J02Rik | 0.690342919  | 0.008732297 |

|          |         |              |             |
|----------|---------|--------------|-------------|
| 17309154 | Kctd12  | -0.757035941 | 0.008732556 |
| 17288992 | Edil3   | 1.098635104  | 0.008747918 |
| 17523852 | Birc2   | 0.539320236  | 0.008753412 |
| 17319539 | Phf5a   | 0.80853592   | 0.008753412 |
| 17534593 | Bcor1   | -0.493373474 | 0.008754179 |
| 17229988 | Cadm3   | 0.79455332   | 0.008754179 |
| 17462905 | Lpcat3  | 0.604751573  | 0.008754179 |
| 17534335 | Mir3110 | -0.626180708 | 0.008754179 |
| 17544904 | Rbm41   | 0.608078828  | 0.008754179 |
| 17478521 | Tubgcp5 | 0.890292482  | 0.008754179 |
| 17209183 |         | 0.734733892  | 0.008754179 |
| 17206479 |         | 0.942849805  | 0.008754179 |
| 17268634 |         | 0.664353533  | 0.008754179 |
| 17341695 |         | 0.638121971  | 0.008754179 |
| 17357227 |         | 0.802058009  | 0.008754179 |
| 17549068 |         | -0.794642359 | 0.008754179 |
| 17502039 | Rab3a   | 0.652676264  | 0.008759905 |
| 17534569 | Utp14a  | 0.74450969   | 0.008759905 |
| 17336655 | Fkbpl   | 0.876642585  | 0.008773386 |
| 17313836 | Atxn10  | 0.483313939  | 0.008782703 |
| 17306362 | Prmt5   | 0.600695509  | 0.008782703 |
| 17523457 | Tcaim   | 0.700370797  | 0.008791269 |
| 17372052 | Gm20440 | -0.842882225 | 0.008810496 |
| 17212318 | Mrps9   | 0.546471219  | 0.008810496 |
| 17496806 | Prss8   | 1.049543542  | 0.008810496 |
| 17395131 | Mir298  | -1.050799347 | 0.008815156 |
| 17299613 | Vmn2r88 | -0.657691409 | 0.008832079 |
| 17408442 |         | -0.717988886 | 0.008832079 |
| 17308349 | Polr3d  | 0.655599419  | 0.008833029 |
| 17210121 |         | -1.121461741 | 0.008833029 |
| 17462998 | Zfp384  | 0.580237199  | 0.008833999 |
| 17383246 | Gm13399 | -0.751851271 | 0.008848845 |
| 17354263 | Fem1c   | 0.515891081  | 0.008859362 |
| 17341690 | Pdpk1   | 0.496825482  | 0.008863324 |
| 17418976 | Sync    | -0.929421655 | 0.008869958 |
| 17325861 | Cd200r1 | -0.905651431 | 0.008871031 |
| 17219488 |         | -0.614423394 | 0.008871031 |
| 17264295 | Adprm   | 0.631857213  | 0.00888403  |
| 17433151 | Nmnat1  | 0.728505617  | 0.008886169 |
| 17284568 |         | -0.98737011  | 0.008886169 |
| 17480763 | Rab6a   | 0.612802134  | 0.0088993   |
| 17468828 | Plxna1  | -0.644983002 | 0.0089052   |
| 17401725 |         | -1.08713776  | 0.0089052   |

|          |               |              |             |
|----------|---------------|--------------|-------------|
| 17269769 | Fam134c       | 0.621576706  | 0.008906618 |
| 17498370 | Nadsyn1       | 0.795908681  | 0.008906618 |
| 17500832 | Fat1          | -0.687774561 | 0.00891     |
| 17433656 | 5930403L14Rik | -0.641586754 | 0.008910048 |
| 17233742 |               | 0.554792053  | 0.008910048 |
| 17412653 | Rars2         | 0.589884177  | 0.00892817  |
| 17462180 | Zfp239        | 0.731217026  | 0.00892817  |
| 17483325 | Fbrs          | -0.638698287 | 0.008931969 |
| 17351559 | Ldlrad4       | -0.81704606  | 0.008931969 |
| 17528863 | Tmod2         | 0.687732687  | 0.008931969 |
| 17526683 | Rbm7          | 0.607404679  | 0.008935783 |
| 17329298 | Etv5          | -0.79376473  | 0.008945257 |
| 17291780 | Tubb2b        | 0.815108819  | 0.008948309 |
| 17321761 | Smagp         | 0.748511165  | 0.00895431  |
| 17471166 | Ndufa9        | 0.552942697  | 0.008969793 |
| 17245383 | Helb          | 0.533067456  | 0.008970991 |
| 17542364 | Bgn           | -0.65485844  | 0.008972453 |
| 17454082 | Pcolce        | -0.729455975 | 0.008972453 |
| 17485910 | Fam71e2       | -0.679908131 | 0.008977653 |
| 17259902 | Slc35e4       | -0.572862446 | 0.008977653 |
| 17218277 | Nmnat2        | 0.638541245  | 0.008978358 |
| 17467742 | Vamp5         | -0.922633848 | 0.009001043 |
| 17283685 | Gsc           | -0.98161488  | 0.009001952 |
| 17305789 | Dlgap5        | 0.603659139  | 0.009004654 |
| 17523990 | Jrkl          | 0.636006043  | 0.009004654 |
| 17507673 | 2610019F03Rik | 0.460635265  | 0.009005522 |
| 17235941 | Chst11        | -0.772132542 | 0.009005522 |
| 17522761 | Dync1li1      | 0.577266379  | 0.009011957 |
| 17296979 | Gm10340       | 1.333196213  | 0.009020232 |
| 17266079 | Glod4         | 0.692388513  | 0.009023491 |
| 17539914 | Pqbp1         | 0.561211335  | 0.009023491 |
| 17225893 | Ppip5k2       | 0.670962333  | 0.00902595  |
| 17445458 |               | -0.824009062 | 0.00902595  |
| 17326541 | Vgll3         | -0.680190428 | 0.009026071 |
| 17287891 | Hnrnpk        | 1.49498984   | 0.009026286 |
| 17446767 | Cgref1        | 0.696052134  | 0.009026762 |
| 17327765 | Coro7         | -0.504028158 | 0.009028712 |
| 17325438 | Hcls1         | -0.975144851 | 0.009028712 |
| 17438324 |               | 0.643958539  | 0.009028712 |
| 17257906 | Map2k6        | 1.020050581  | 0.009028806 |
| 17355026 | Atp8b1        | 0.889493709  | 0.00902915  |
| 17332084 | Paxbp1        | 0.650190447  | 0.009046157 |
| 17338378 | Trem14        | -0.593260139 | 0.009058094 |

|          |               |              |             |
|----------|---------------|--------------|-------------|
| 17520396 | Slc9a9        | -1.072668476 | 0.009059397 |
| 17473177 | Prpf31        | 0.807255183  | 0.009062123 |
| 17335902 | Rrp1b         | 0.737304334  | 0.009071449 |
| 17520560 | Tfdp2         | 0.589310312  | 0.009071797 |
| 17260869 | Slc1a4        | 1.006522111  | 0.009088891 |
| 17367978 | Npdc1         | -0.525092899 | 0.009089671 |
| 17320307 | Mapk12        | -0.701122072 | 0.009097994 |
| 17446068 | Pus7          | 0.545629337  | 0.009097994 |
| 17378754 | Ctnnbl1       | 0.661433812  | 0.009105955 |
| 17346175 | D17Wsu104e    | 0.867376165  | 0.009128578 |
| 17309345 | Gm6219        | -0.566791842 | 0.009129468 |
| 17404750 | Mccc1         | 0.613453911  | 0.009129468 |
| 17222549 | Rnf149        | 0.750437917  | 0.009129468 |
| 17243717 | Syn3          | 0.805343968  | 0.009130194 |
| 17548981 | Cox7b         | -0.90694364  | 0.009143789 |
| 17295960 | Cwc27         | 0.600907478  | 0.009143789 |
| 17382972 | Sdccag3       | 0.488472399  | 0.009143789 |
| 17307157 | Xpo4          | 0.558779761  | 0.009143789 |
| 17363559 | Fam189a2      | 0.955536566  | 0.009153179 |
| 17418540 | Stk40         | 0.595978291  | 0.009156606 |
| 17298620 | 1810011H11Rik | -0.82874227  | 0.009157249 |
| 17525240 | St14          | 1.112836426  | 0.009157249 |
| 17466768 | LOC100045191  | 0.523307141  | 0.0091599   |
| 17435503 | 1700096K18Rik | 0.827188728  | 0.009169758 |
| 17317056 | Enpp2         | 1.114662196  | 0.009169758 |
| 17277270 | Lin52         | 0.577971287  | 0.009169758 |
| 17278840 | Mir376a       | 0.624348309  | 0.009169758 |
| 17429659 | Ppie          | 0.648285043  | 0.009169758 |
| 17257502 | Taco1         | 0.548802195  | 0.009169758 |
| 17470417 | Ccdc77        | 0.885989005  | 0.009171771 |
| 17461330 | Lrn1          | 1.334675852  | 0.009171771 |
| 17386714 | Ttc30b        | 0.654946408  | 0.009171771 |
| 17470779 | Emg1          | 0.542507314  | 0.009171914 |
| 17431496 | Pnrc2         | 0.51103711   | 0.009171914 |
| 17203327 |               | 0.858827978  | 0.009171914 |
| 17346990 | Smchd1        | 0.596883358  | 0.009182307 |
| 17275296 |               | -0.793291371 | 0.009182307 |
| 17384567 | Olfr355       | -0.625505941 | 0.009204359 |
| 17201057 |               | 0.662467242  | 0.009204359 |
| 17458465 | Ccdc126       | 0.63208999   | 0.009214806 |
| 17521485 | Mst1r         | -0.985767196 | 0.00922014  |
| 17470093 | 4933440N22Rik | -0.920702901 | 0.009226807 |
| 17390823 | Slc30a4       | 0.509105908  | 0.009226807 |

|          |               |              |             |
|----------|---------------|--------------|-------------|
| 17266563 | Wsb1          | 1.010703266  | 0.009243296 |
| 17405688 | Ccnl1         | 0.641544205  | 0.00924537  |
| 17262887 | Anxa6         | -0.712937166 | 0.009250196 |
| 17519910 | Ttk           | 0.76165075   | 0.009255563 |
| 17216998 | Eif2d         | 0.589508571  | 0.009258679 |
| 17325904 | Ccdc80        | -1.064084947 | 0.00925992  |
| 17470820 | Grcc10        | -0.566287523 | 0.00925992  |
| 17551087 |               | -3.533530339 | 0.00925992  |
| 17200147 |               | 1.297844758  | 0.009266228 |
| 17414802 | Pappa         | -1.185568671 | 0.009266788 |
| 17239751 | Rps12         | 0.779424257  | 0.009268625 |
| 17379808 | Cse1l         | 0.534693701  | 0.00928122  |
| 17325553 |               | -0.578833782 | 0.00928122  |
| 17346812 |               | 0.571359943  | 0.009287889 |
| 17245361 | Gm16320       | -0.5668089   | 0.009311572 |
| 17548514 | Suclg2        | 0.535740006  | 0.009311572 |
| 17524914 | Ecsit         | 0.50315501   | 0.009312403 |
| 17323457 | Serpind1      | -0.882316783 | 0.009320743 |
| 17252065 | Gltpd2        | -0.666251521 | 0.009321109 |
| 17545291 | Tmem29        | 0.71085048   | 0.009321109 |
| 17372759 | Olfr1014      | -0.720500187 | 0.009321712 |
| 17509642 | Klhl2         | 0.811421265  | 0.009327567 |
| 17455401 | Slc7a1        | 0.907783161  | 0.009327567 |
| 17487833 | Grik5         | -0.728041323 | 0.009331459 |
| 17404835 | Bbs7          | 0.98937575   | 0.009342327 |
| 17469936 | Tmem40        | 0.628437075  | 0.009342327 |
| 17321179 | Olfr288       | -0.545517678 | 0.009349005 |
| 17222026 | Zfp451        | 0.624455967  | 0.009397589 |
| 17281565 | Gm9887        | -0.873632498 | 0.009397929 |
| 17418168 | Nt5c1a        | -0.565293285 | 0.00940877  |
| 17518526 | Clpx          | 0.694198714  | 0.009420926 |
| 17249787 | Gpx3          | 0.566177338  | 0.009421905 |
| 17468714 |               | 0.69779855   | 0.009426603 |
| 17326438 | Cldn25        | 0.515673088  | 0.009450949 |
| 17525955 | Sc5d          | 0.752795129  | 0.009456306 |
| 17502157 | Ocel1         | -0.514666312 | 0.009463633 |
| 17521091 | Aste1         | 0.951127228  | 0.009470464 |
| 17518331 | Tipin         | 0.732154843  | 0.009500015 |
| 17271757 | Gm11711       | -0.616098046 | 0.009522786 |
| 17232244 | Med23         | 0.701183527  | 0.009559547 |
| 17496376 | Coro1a        | -0.793039295 | 0.009561434 |
| 17526081 | Tmem136       | 0.752234165  | 0.009562524 |
| 17245214 | 9530003J23Rik | -0.685556356 | 0.009565725 |

|          |               |              |             |
|----------|---------------|--------------|-------------|
| 17477322 | Klk1b26       | -0.983447358 | 0.009565725 |
| 17238844 |               | -0.713708916 | 0.009565725 |
| 17230715 | Hlx           | -0.934984951 | 0.009574528 |
| 17541901 | Rbmx          | 0.612497759  | 0.009574528 |
| 17542249 | Pnma5         | 0.591525934  | 0.009580793 |
| 17237217 | Gm5428        | 0.537946122  | 0.009581716 |
| 17290997 | Hist1h2bl     | -0.542553774 | 0.009618201 |
| 17214685 | Acsl3         | 0.962818594  | 0.009626352 |
| 17333092 | Sft2d1        | -0.521592932 | 0.009626352 |
| 17505863 | Vat1l         | 1.29005018   | 0.009626352 |
| 17421074 | Hspb7         | -1.47743303  | 0.009628596 |
| 17329034 | Olfr167       | -0.750327219 | 0.009631377 |
| 17244737 | Ptprq         | -0.998294548 | 0.009631377 |
| 17534739 |               | -0.533823717 | 0.009631377 |
| 17341679 |               | -0.816246665 | 0.009631377 |
| 17392670 | Zfp345        | 0.682122475  | 0.009647163 |
| 17365690 | Gm10197       | 1.333663881  | 0.009655385 |
| 17309070 | Dis3          | 0.601936326  | 0.009660465 |
| 17238882 |               | -0.539353406 | 0.009664451 |
| 17228825 | Klhl20        | 0.653517161  | 0.009670312 |
| 17548324 | Anp32b        | 0.465955135  | 0.00968528  |
| 17214197 | Slc11a1       | -1.186238198 | 0.00968528  |
| 17290939 | Pgbd1         | 0.689727321  | 0.009689622 |
| 17247485 | 2900053O20Rik | 0.52050965   | 0.009696476 |
| 17551135 |               | -1.542972889 | 0.009696476 |
| 17507693 | C030037F17Rik | -0.563723899 | 0.00969733  |
| 17228136 | Lamc2         | 0.66770466   | 0.009698534 |
| 17425181 | Tex10         | 0.579974395  | 0.009698534 |
| 17338043 | Yipf3         | -0.56126126  | 0.009698534 |
| 17433221 | Slc25a33      | 0.609028303  | 0.009700663 |
| 17415219 | Acer2         | 0.734230087  | 0.00970126  |
| 17487905 | Pafah1b3      | 0.5033015    | 0.009702557 |
| 17340411 | 2700099C18Rik | 0.78528719   | 0.009713846 |
| 17352997 | Trappc8       | 0.463922607  | 0.009716636 |
| 17201657 |               | -1.101001496 | 0.009716636 |
| 17548750 | Cryab         | -0.843368454 | 0.009723169 |
| 17299313 | Gm15562       | -1.290202914 | 0.009723169 |
| 17438823 | Dck           | 0.645761268  | 0.009734845 |
| 17503948 | Nup93         | 0.603816097  | 0.009737861 |
| 17327311 | Morc3         | 0.42651466   | 0.009748265 |
| 17328425 | Ube2v2        | 1.114044017  | 0.009748265 |
| 17283935 |               | 0.647252655  | 0.009748265 |
| 17294416 | Zfp825        | 0.804661986  | 0.00974893  |



|          |               |              |             |
|----------|---------------|--------------|-------------|
| 17316179 | Fbxl7         | -0.683488456 | 0.009767282 |
| 17283970 | mmu-mir-409   | -0.836425763 | 0.009767282 |
| 17366902 | Mir669c       | 0.87297376   | 0.009784369 |
| 17477774 | Hrc           | -0.52282975  | 0.009785936 |
| 17272019 | Caskin2       | 0.695212011  | 0.009797957 |
| 17493034 | Gm6155        | -0.708131288 | 0.009797977 |
| 17222396 | Mitd1         | 0.688871027  | 0.009797977 |
| 17208675 |               | 0.643520437  | 0.009797977 |
| 17325261 | Hspbap1       | 0.765338414  | 0.009798126 |
| 17217887 | 4930596I21Rik | -0.59442014  | 0.009821691 |
| 17464915 | B630005N14Rik | 0.522226451  | 0.009822576 |
| 17283028 |               | 1.21908257   | 0.009822576 |
| 17274092 |               | -0.536682302 | 0.009822576 |
| 17250935 | Gm12299       | -0.556039128 | 0.009824186 |
| 17207229 |               | -1.051146864 | 0.009824186 |
| 17330684 | Tagln3        | 0.601609486  | 0.009836375 |
| 17259870 |               | 0.483281845  | 0.009838187 |
| 17476773 | Cep89         | 0.691267355  | 0.00984589  |
| 17511868 | Fam192a       | 0.545086248  | 0.00984589  |
| 17299663 | Slc39a2       | 0.955348198  | 0.009853259 |
| 17522870 | 4933432G23Rik | -0.564202855 | 0.009858906 |
| 17411216 | Fam73a        | 1.034814438  | 0.009860234 |
| 17403070 | Adh1          | 0.817150458  | 0.009885204 |
| 17379942 | A530013C23Rik | -0.580620905 | 0.009886803 |
| 17438530 | Lphn3         | 1.069098567  | 0.009886803 |
| 17345830 | Daam2         | -0.967838931 | 0.00989019  |
| 17255999 | ErbB2         | 0.609023051  | 0.009899451 |
| 17447110 | Nkx1-1        | -0.699579268 | 0.009909621 |
| 17358503 | Rcl1          | 0.52033989   | 0.009909621 |
| 17496920 | Mcmbp         | 0.731789785  | 0.009915575 |
| 17460941 | Slc6a6        | -0.615390743 | 0.009926647 |
| 17514122 | 2810004N23Rik | 0.956085491  | 0.009933306 |
| 17200597 |               | 2.20069663   | 0.009933306 |
| 17328484 | Dnm1l         | 0.535735271  | 0.009950363 |
| 17488933 | Zfp82         | 0.690824577  | 0.009952954 |
| 17337110 | H2-Q5         | -0.688279526 | 0.00996644  |
| 17501427 | Cbr4          | 0.533125752  | 0.009970286 |
| 17327544 | Bace2         | 0.692064288  | 0.009972809 |
| 17388252 | Zfp408        | 0.657649986  | 0.009975732 |
| 17202487 |               | -0.784870237 | 0.009977015 |
| 17476565 | Gm17077       | 0.692368592  | 0.009982752 |
| 17499728 | Gm21002       | -0.578981927 | 0.009982752 |
| 17518314 |               | 1.212304213  | 0.009982881 |

|          |               |              |             |
|----------|---------------|--------------|-------------|
| 17303353 | Gm10340       | 0.981182659  | 0.009985301 |
| 17481916 | Parva         | -0.533765736 | 0.009997457 |
| 17529227 |               | -0.584383487 | 0.010005096 |
| 17403148 | Eif4e         | -0.572878672 | 0.010008906 |
| 17243953 | n-R5s79       | -0.646950103 | 0.010008906 |
| 17430628 | Gm10570       | -0.865946027 | 0.010012146 |
| 17401296 | Rsbm1         | 0.591466764  | 0.010012146 |
| 17499796 | Gm15315       | -0.866416546 | 0.010015188 |
| 17412144 | Usp45         | 0.659713188  | 0.010021034 |
| 17515577 | Ncapd3        | 0.651483011  | 0.010025016 |
| 17516621 | Bcl9l         | -0.510728965 | 0.010035467 |
| 17420486 | Ddost         | 0.654447136  | 0.010056225 |
| 17420347 | Ece1          | -0.893110937 | 0.010065948 |
| 17481630 | Olfr508       | -1.151701003 | 0.010065948 |
| 17493137 | Olfr303       | -0.421151633 | 0.01007436  |
| 17473765 | Zfp110        | 0.84063548   | 0.010078443 |
| 17216120 | Gm9994        | -0.521633603 | 0.010086315 |
| 17208009 |               | -1.672758873 | 0.010087479 |
| 17479371 | Fanci         | 1.031732802  | 0.010098677 |
| 17325291 | Kpna1         | 0.687165956  | 0.010098677 |
| 17279317 | A530016L24Rik | -0.564520359 | 0.010100254 |
| 17431332 | Man1c1        | -1.165671214 | 0.010118319 |
| 17204673 |               | 1.346709387  | 0.010118714 |
| 17484094 | Zranb1        | 0.54016046   | 0.010128026 |
| 17203953 |               | 0.913420925  | 0.01014688  |
| 17278783 | AF357428      | 0.855322593  | 0.010149151 |
| 17242558 | Ccdc105       | -0.663936355 | 0.010149151 |
| 17234468 | Zfp280b       | 0.635930752  | 0.010149151 |
| 17209539 |               | -1.201050276 | 0.010149151 |
| 17207075 |               | -1.07152707  | 0.010164585 |
| 17439978 | Cdc7          | 1.111548884  | 0.010169291 |
| 17323069 |               | 0.558696262  | 0.010173769 |
| 17508380 | Letm2         | 0.724668332  | 0.010185898 |
| 17429449 | Foxo6         | -0.586927216 | 0.010186767 |
| 17221360 | Lactb2        | 0.484791324  | 0.010186767 |
| 17238836 |               | -0.79007068  | 0.010186767 |
| 17335567 | Rnf8          | 0.526408297  | 0.010197012 |
| 17396823 | Fxr1          | 0.498171154  | 0.010201208 |
| 17259078 | Rnf213        | -1.411514352 | 0.010204474 |
| 17529679 | Zic1          | 1.28898795   | 0.010204474 |
| 17349433 | Kif20a        | 0.834454794  | 0.010208401 |
| 17520490 | Atr           | -0.607259532 | 0.010221421 |
| 17449527 |               | -0.885292976 | 0.010227379 |

|          |               |              |             |
|----------|---------------|--------------|-------------|
| 17426942 |               | -0.947319319 | 0.010227494 |
| 17510793 | Smarca5       | 0.692489684  | 0.010250022 |
| 17239074 | Katna1        | 0.485573092  | 0.010255083 |
| 17305813 | Atg14         | 0.57545327   | 0.010259611 |
| 17233565 | Micu1         | 0.764021201  | 0.010259611 |
| 17417146 | Pdzk1ip1      | 0.696895967  | 0.010263184 |
| 17515478 | Bmper         | 0.658695141  | 0.010270717 |
| 17275223 | Immp2l        | 0.703310622  | 0.010270717 |
| 17363505 | Smc5          | 0.504363174  | 0.010270717 |
| 17550623 |               | -1.422395491 | 0.010270717 |
| 17357389 | Ahnak         | -0.584163875 | 0.010272989 |
| 17427441 | Gm10192       | -0.786601948 | 0.010274025 |
| 17260815 | Meis1         | 1.009457599  | 0.01027428  |
| 17372045 | Hoxd11        | -0.967625715 | 0.01027564  |
| 17435403 | Chpf2         | -0.448172357 | 0.010276054 |
| 17342006 |               | 1.352758272  | 0.010278422 |
| 17223200 | Sf3b1         | 0.469275681  | 0.010286384 |
| 17205485 |               | 0.662977829  | 0.010290266 |
| 17396178 | Ythdf3        | 0.500772797  | 0.01029159  |
| 17360462 | Acsf5         | 0.87342638   | 0.010298248 |
| 17406179 | Gm16000       | -0.569808831 | 0.010298248 |
| 17368476 | Adamtsl2      | -0.559953046 | 0.010299496 |
| 17374089 | Lin7c         | 0.45025619   | 0.010310585 |
| 17411304 | Rabggtb       | 0.566598518  | 0.010310585 |
| 17549352 | Gja1          | 1.34406737   | 0.010313989 |
| 17549740 | Gja1          | 1.34406737   | 0.010313989 |
| 17505641 | Gm15894       | -0.631263294 | 0.010313989 |
| 17200967 |               | 1.129166454  | 0.010313989 |
| 17247638 | Gm12056       | -0.702165362 | 0.010322794 |
| 17498897 | Tnfsf13b      | -0.514419285 | 0.010322794 |
| 17315167 | Grasp         | 0.696960725  | 0.010327136 |
| 17221240 |               | 0.812003282  | 0.010350599 |
| 17464367 | Ppfibp1       | -0.606884509 | 0.010360089 |
| 17313000 | Kdelr3        | 0.95169919   | 0.010363002 |
| 17525163 | Acad8         | 0.915644993  | 0.010378645 |
| 17448798 |               | 2.255930784  | 0.010388274 |
| 17218845 | Selp          | -1.659819165 | 0.010392017 |
| 17322444 | Spt1          | -0.543556713 | 0.01039694  |
| 17427240 | Plaa          | 0.478416541  | 0.010399381 |
| 17431607 | C1qb          | -1.548040246 | 0.010406798 |
| 17275545 | 1110008L16Rik | 0.490866992  | 0.010412215 |
| 17548910 | Arf1          | 0.467021476  | 0.010416768 |
| 17508674 | Ubxn8         | 0.568634142  | 0.010416768 |

|          |               |              |             |
|----------|---------------|--------------|-------------|
| 17452453 | Gm10064       | -0.790692978 | 0.010437488 |
| 17482547 | Gm5737        | -0.584935095 | 0.010437488 |
| 17327995 | Tmem186       | 0.723075406  | 0.010439425 |
| 17443663 | Tsc22d4       | -0.492928974 | 0.010439425 |
| 17544491 | Btk           | -1.182474606 | 0.010447493 |
| 17510563 | Slc35e1       | 0.653051234  | 0.010447493 |
| 17479697 | 2900076A07Rik | 0.789236698  | 0.010457834 |
| 17302996 | Gm2956        | 0.991440061  | 0.010461672 |
| 17420016 | Id3           | -0.900974656 | 0.010464229 |
| 17427067 | Gm12597       | -0.953298311 | 0.010465044 |
| 17482719 | Ubfd1         | 0.594694628  | 0.010465044 |
| 17533416 | Ddx3x         | 0.79949603   | 0.010480836 |
| 17288051 | Zfp808        | 0.526773068  | 0.010490174 |
| 17381519 |               | -1.395606222 | 0.010490174 |
| 17350901 | A730017C20Rik | 1.418163671  | 0.010500209 |
| 17480740 | Ucp2          | -0.554047596 | 0.010500209 |
| 17377630 | Rspo4         | -0.651220945 | 0.010504206 |
| 17519568 | Gm19569       | 0.555714172  | 0.010524961 |
| 17428217 | Cdkn2c        | -0.596126602 | 0.010542891 |
| 17421972 | Errfi1        | 0.771248706  | 0.010542891 |
| 17381306 | Mcm10         | 0.745066378  | 0.010542891 |
| 17366782 | Mir467a-3     | 0.903881313  | 0.010542891 |
| 17366818 | Mir467a-3     | 0.903881313  | 0.010542891 |
| 17366878 | Mir467a-3     | 0.903881313  | 0.010542891 |
| 17373915 | Wt1           | -1.535101557 | 0.010542891 |
| 17233208 |               | -0.711368553 | 0.010542891 |
| 17297759 | Anxa11        | 0.705326599  | 0.010561746 |
| 17295817 | Mast4         | -0.842076789 | 0.010565128 |
| 17222564 | Snord89       | 0.65960753   | 0.010565128 |
| 17488886 | Zfp940        | 0.541145104  | 0.010565128 |
| 17223471 |               | -0.5700377   | 0.010565128 |
| 17238236 | Ptges3        | 0.481473483  | 0.010569924 |
| 17544696 | Nxf3          | 1.202073273  | 0.010574597 |
| 17533170 | Gm6592        | -0.77208025  | 0.01057482  |
| 17321561 | Nckap5l       | -0.634982151 | 0.01058633  |
| 17395170 | Slmo2         | 0.740228721  | 0.01058633  |
| 17227872 | BC003331      | 0.712828804  | 0.010588518 |
| 17455962 | C1galt1       | 0.684848409  | 0.010588518 |
| 17252170 | Rnf167        | 0.772734857  | 0.010588518 |
| 17204447 |               | 1.235092719  | 0.010588518 |
| 17372233 | Dfnb59        | -0.550897824 | 0.01058966  |
| 17352493 | Epc1          | 0.526026561  | 0.01058966  |
| 17341872 | Mlst8         | 0.722385327  | 0.01058966  |

|          |               |              |             |
|----------|---------------|--------------|-------------|
| 17445440 | Steap1        | -0.533160585 | 0.01058966  |
| 17208093 |               | -1.074635813 | 0.01058966  |
| 17550873 |               | -0.48635364  | 0.01058966  |
| 17247921 | Gm6899        | -0.664890916 | 0.010603564 |
| 17536163 | n-R5s9        | -0.485746754 | 0.010603564 |
| 17256502 | Naglu         | -0.773596331 | 0.0106043   |
| 17342653 | Gm17218       | -0.837832406 | 0.010607503 |
| 17406221 | Gucy1a3       | -1.031764769 | 0.010607503 |
| 17551151 |               | -1.40135401  | 0.010613988 |
| 17249994 | 4930438A08Rik | -0.594404389 | 0.010634524 |
| 17371800 | Itga6         | 0.706096356  | 0.010639266 |
| 17400275 | Gm16740       | 0.587277792  | 0.010652418 |
| 17467656 | Mrpl35        | 0.519380372  | 0.010660933 |
| 17319450 | 8430426J06Rik | -0.667478129 | 0.010673083 |
| 17279165 |               | 0.621725903  | 0.010673083 |
| 17358962 | Btaf1         | 0.861593278  | 0.010675277 |
| 17454687 | Papolb        | -0.530587401 | 0.010677405 |
| 17362207 | Dnajc4        | 0.752242465  | 0.010681133 |
| 17403533 | Ctbs          | 0.703176257  | 0.010681161 |
| 17219997 | Kif26b        | -1.008578076 | 0.010681161 |
| 17202167 |               | -0.883977121 | 0.010685796 |
| 17527312 | Chrna3        | 1.141825103  | 0.010710114 |
| 17365054 | Cwf19l1       | 0.613696777  | 0.010710114 |
| 17269404 | Krt16         | 1.210019721  | 0.010714018 |
| 17371318 |               | -0.636490559 | 0.010714018 |
| 17528934 | Tinag         | -0.729004321 | 0.010714274 |
| 17550615 |               | -1.549190188 | 0.010718754 |
| 17405764 | Ift80         | 0.944760306  | 0.010725018 |
| 17407259 | Slc27a3       | 0.961673818  | 0.01072554  |
| 17519821 | Myo6          | 1.169519638  | 0.010731402 |
| 17500812 |               | -0.889772059 | 0.010731402 |
| 17299862 | Trav14n-2     | -0.5175971   | 0.010736921 |
| 17299939 | Trav14n-2     | -0.5175971   | 0.010736921 |
| 17254835 | A430104N18Rik | -1.012781616 | 0.010744278 |
| 17276614 | Churc1        | 0.540117284  | 0.010769157 |
| 17545785 | Cdkl5         | 0.741757639  | 0.010773132 |
| 17509208 | Gm16675       | -0.556112821 | 0.010790384 |
| 17240005 | Rnf146        | 0.547927276  | 0.010790384 |
| 17223594 | Wdr12         | 0.76255087   | 0.010790384 |
| 17283200 | 4930474N09Rik | -0.759118181 | 0.01080927  |
| 17394015 | Jph2          | -0.961046393 | 0.01080927  |
| 17312829 | Lgals1        | -0.664100929 | 0.01080927  |
| 17514922 | LOC100503048  | -0.803060547 | 0.01080927  |

|          |          |              |             |
|----------|----------|--------------|-------------|
| 17363177 | Tle4     | 0.803331096  | 0.01080927  |
| 17210377 |          | 1.224116618  | 0.01080927  |
| 17308480 |          | 0.577819475  | 0.01080927  |
| 17461968 | Mkrn2    | 0.611206727  | 0.010813114 |
| 17210183 |          | -1.512381455 | 0.010815827 |
| 17548334 | Gm11893  | 0.55967571   | 0.010816551 |
| 17526980 | Mir34b   | -0.838641781 | 0.010816551 |
| 17203345 |          | 0.822146287  | 0.010816551 |
| 17534720 | Hprt     | 0.72059027   | 0.010816645 |
| 17477053 |          | -0.70299394  | 0.010816645 |
| 17522779 | Cmtm6    | 0.638544248  | 0.010818922 |
| 17442970 | Vkorc111 | 0.793599909  | 0.010826003 |
| 17393288 | Gss      | 0.552759389  | 0.010833977 |
| 17203155 |          | -0.578053127 | 0.010833977 |
| 17201603 |          | -0.923767201 | 0.01083837  |
| 17298090 | Erc2     | 0.739333917  | 0.010854768 |
| 17278884 | Mir541   | 0.664046165  | 0.010854768 |
| 17329026 | Olfr164  | -0.519155507 | 0.010857824 |
| 17338200 | Tbcc     | 0.78186579   | 0.010865854 |
| 17202263 |          | 1.424380194  | 0.010869265 |
| 17408974 | Cym      | -0.928519496 | 0.010870153 |
| 17228871 | Suco     | 0.51963393   | 0.010870153 |
| 17238291 |          | 1.200769889  | 0.010870153 |
| 17278711 | Mir432   | 0.660564101  | 0.010884636 |
| 17327223 | Smim11   | 0.917988629  | 0.010895535 |
| 17277879 | Tdp1     | 0.702996322  | 0.010895535 |
| 17267209 | Brip1    | 0.836755232  | 0.010926308 |
| 17250829 | Tekt3    | -0.691080217 | 0.010926308 |
| 17389687 |          | -1.344245423 | 0.010926511 |
| 17347987 | Gm19783  | 0.895364719  | 0.010926777 |
| 17426277 | Akna     | -0.752801787 | 0.010930207 |
| 17454977 | Baiap2l1 | 0.581778125  | 0.010937831 |
| 17309013 | Pcdh9    | 0.793843268  | 0.010937831 |
| 17206243 |          | 0.726607615  | 0.010937831 |
| 17319403 | Rpl3     | 0.768117358  | 0.010941758 |
| 17517175 | Ppp2r1b  | 0.619725857  | 0.010944299 |
| 17331306 | Gm9581   | 0.686807077  | 0.010951723 |
| 17233068 |          | 1.161100574  | 0.010951723 |
| 17535241 | Styx     | 0.482284009  | 0.010953371 |
| 17256276 |          | -0.936670199 | 0.010953371 |
| 17400813 | Notch2   | -0.658051942 | 0.010953689 |
| 17498360 | Mrgprg   | -0.456950086 | 0.010954114 |
| 17470323 | Erc1     | 0.621627378  | 0.010977279 |

|          |               |              |             |
|----------|---------------|--------------|-------------|
| 17300369 |               | 0.57645019   | 0.010977279 |
| 17436128 | Zfp512        | 0.56117443   | 0.010987053 |
| 17459656 | Capg          | -0.582287692 | 0.010996701 |
| 17218013 | Glr2          | 0.666713721  | 0.010996701 |
| 17543870 | Zdhc15        | 0.781340857  | 0.010996701 |
| 17327025 | 4931406G06Rik | -0.590764362 | 0.010998358 |
| 17236729 |               | -0.590935735 | 0.010998358 |
| 17223852 | D630023F18Rik | 0.624772755  | 0.011005542 |
| 17393789 | Tgm2          | -1.032477636 | 0.011008046 |
| 17411323 | Acadm         | 0.673729484  | 0.011013237 |
| 17388803 | Cat           | 0.717444386  | 0.011032643 |
| 17370897 | Gpd2          | 0.658130049  | 0.011032643 |
| 17484112 | 2700050L05Rik | 0.874952884  | 0.011040814 |
| 17489707 | Cebpg         | 0.464728394  | 0.011040814 |
| 17203985 |               | 1.12207753   | 0.011043587 |
| 17404821 | Ccna2         | 0.870375079  | 0.011054699 |
| 17446539 | Paxip1        | 0.69626575   | 0.01107457  |
| 17214395 | Gm16582       | -0.689855862 | 0.01108438  |
| 17284512 |               | -0.894600024 | 0.01108438  |
| 17347888 | Pigf          | 0.661942881  | 0.011085873 |
| 17403514 | Ssx2ip        | 0.611426579  | 0.011085873 |
| 17329819 | Lrrc33        | -0.610912659 | 0.011090232 |
| 17272552 | Gm16045       | -0.510082898 | 0.011108678 |
| 17454121 | Agfg2         | -0.749043263 | 0.011113458 |
| 17302636 | Mir19a        | 0.978117347  | 0.011113458 |
| 17380185 | Rae1          | 0.505792171  | 0.011113458 |
| 17451390 | Cmklr1        | 0.833630988  | 0.011127026 |
| 17453698 | Orai2         | -0.683780141 | 0.011127026 |
| 17204961 |               | 1.352886615  | 0.011133671 |
| 17528202 | Rab11a        | 0.440224315  | 0.011140525 |
| 17220018 | Cnst          | 0.622221248  | 0.011141932 |
| 17375083 | Snap23        | 0.681552626  | 0.011141932 |
| 17293748 | Prss47        | -0.563435183 | 0.011142604 |
| 17230034 | AI607873      | -1.263748782 | 0.01116634  |
| 17424573 | Fam214b       | -0.512117295 | 0.01116634  |
| 17210231 |               | 1.599521441  | 0.01116634  |
| 17494315 | Olfr648       | -0.689389692 | 0.011171424 |
| 17478801 | Otud7a        | 0.680686524  | 0.011171424 |
| 17458308 | Atp6v0e2      | 0.908840803  | 0.011177354 |
| 17548365 | Mul1          | -0.543943787 | 0.011179418 |
| 17370043 | Angptl2       | -0.638311253 | 0.011179883 |
| 17254976 | Mir378b       | -0.558898788 | 0.011179883 |
| 17282158 | Rdh11         | 0.747135933  | 0.011179883 |

|          |               |              |             |
|----------|---------------|--------------|-------------|
| 17252557 | 1200014J11Rik | 0.464888766  | 0.011197801 |
| 17466687 | Osbp13        | 0.473021133  | 0.011197801 |
| 17301131 | Rnaseh2b      | 0.750155486  | 0.011197801 |
| 17249916 | n-R5s69       | -1.194411386 | 0.011208596 |
| 17402485 | 4930422G04Rik | 0.77646473   | 0.011212064 |
| 17209065 |               | -0.61276247  | 0.011216149 |
| 17286228 | Gm11362       | -1.873147515 | 0.011223865 |
| 17482093 | Gm10589       | 0.965976866  | 0.01126139  |
| 17472129 | Gucy2c        | -0.829327326 | 0.01126139  |
| 17287041 | Kdm1b         | 0.572891151  | 0.0112685   |
| 17313199 | Adsl          | 0.6179605    | 0.011272404 |
| 17218042 | Gm5263        | 1.402886496  | 0.011286336 |
| 17228794 | Zbtb37        | 0.887062036  | 0.011286336 |
| 17241579 |               | -0.55420644  | 0.011286336 |
| 17490917 | Sec1          | -0.622394995 | 0.011291825 |
| 17219248 | Adamts4       | -0.504642815 | 0.011327462 |
| 17300707 | Cma2          | -0.780084666 | 0.011327876 |
| 17395165 | Atp5e         | -0.835978074 | 0.011328673 |
| 17241420 | 2510003E04Rik | 0.642330679  | 0.011342801 |
| 17476970 | Zfp788        | 0.796777297  | 0.011346628 |
| 17309397 | Tgds          | 0.49948515   | 0.011347411 |
| 17537607 | Cstf2         | 0.521330544  | 0.011370438 |
| 17394865 | Sall4         | 1.053670647  | 0.011374554 |
| 17259531 | Gm11773       | -0.684452708 | 0.011375589 |
| 17233740 |               | 0.447824134  | 0.011375589 |
| 17378232 | 1700003F12Rik | -0.674771254 | 0.011380433 |
| 17423713 | Manea         | 0.547442062  | 0.011380433 |
| 17376276 | Nop56         | -1.30660147  | 0.011380433 |
| 17460589 |               | 0.533509174  | 0.011380433 |
| 17385044 | Rnd3          | 0.746948345  | 0.011382842 |
| 17292096 | Gm15810       | -0.537337932 | 0.011389261 |
| 17307638 | Tdh           | 1.047685452  | 0.011394004 |
| 17357229 |               | 1.176950255  | 0.011394004 |
| 17239468 |               | 0.617347998  | 0.011394004 |
| 17371320 | 4933409G03Rik | -0.724603545 | 0.011413679 |
| 17371993 | Gm13709       | -0.611092211 | 0.011413679 |
| 17457876 | Gstk1         | 0.919393297  | 0.011413679 |
| 17550725 |               | -0.440323918 | 0.011413679 |
| 17500957 | Lrp2bp        | -0.620208668 | 0.01143307  |
| 17366750 | Mir467a-2     | 0.849869509  | 0.011436237 |
| 17366762 | Mir467a-2     | 0.849869509  | 0.011436237 |
| 17366794 | Mir467a-2     | 0.849869509  | 0.011436237 |
| 17366806 | Mir467a-2     | 0.849869509  | 0.011436237 |



|          |               |              |             |
|----------|---------------|--------------|-------------|
| 17366830 | Mir467a-2     | 0.849869509  | 0.011436237 |
| 17366842 | Mir467a-2     | 0.849869509  | 0.011436237 |
| 17366854 | Mir467a-2     | 0.849869509  | 0.011436237 |
| 17366866 | Mir467a-2     | 0.849869509  | 0.011436237 |
| 17210525 |               | 0.811459767  | 0.011436237 |
| 17209525 |               | -0.992516589 | 0.011436237 |
| 17273694 | Pomc          | -0.553750989 | 0.011450289 |
| 17318299 | Puf60         | 0.624909676  | 0.011450289 |
| 17500593 |               | -1.401093917 | 0.011450289 |
| 17549140 |               | -0.49271741  | 0.011450289 |
| 17333879 | Gm6811        | -0.620940243 | 0.011453216 |
| 17541695 | Mir363        | -0.851962916 | 0.011465354 |
| 17336516 | Btnl2         | -0.545506174 | 0.011467412 |
| 17432197 | Gm694         | -0.720427833 | 0.011467412 |
| 17415294 | Gm13286       | -0.719738624 | 0.011488356 |
| 17269464 | Jup           | 0.539547423  | 0.011488356 |
| 17330080 | Dirc2         | 0.490806789  | 0.011507563 |
| 17387730 | Olfr1104      | -0.523505091 | 0.011509252 |
| 17259702 | Sfi1          | 0.724555077  | 0.011514839 |
| 17237496 | 4933400F03Rik | -0.548282782 | 0.011519345 |
| 17498398 | Ctnn          | 0.611544499  | 0.011520396 |
| 17547002 | Rmi1          | 0.620294556  | 0.011520396 |
| 17424201 |               | 0.861502154  | 0.01152472  |
| 17425525 | Frrs1l        | 0.872047079  | 0.011544001 |
| 17204715 |               | 1.242391214  | 0.011548619 |
| 17207465 |               | 1.236993137  | 0.011555285 |
| 17327247 |               | -0.741423692 | 0.011562336 |
| 17520085 | Zfp949        | 0.570231756  | 0.01156247  |
| 17443985 | Cyp2w1        | 0.720080407  | 0.011570129 |
| 17466743 | Npvf          | -0.477064529 | 0.01158446  |
| 17456025 | Phf14         | 0.564442901  | 0.011584516 |
| 17423802 |               | -0.715936042 | 0.011586239 |
| 17208615 |               | -0.953564821 | 0.011591203 |
| 17455554 | N4bp2l1       | 0.562913342  | 0.01159715  |
| 17512778 |               | -0.796513363 | 0.01159715  |
| 17245448 | Lemd3         | 0.73269162   | 0.011610197 |
| 17273440 | Cd7           | -0.648328809 | 0.011615971 |
| 17508885 | Mtmr7         | 1.256698419  | 0.011615971 |
| 17290447 | Chrm3         | 0.771218943  | 0.011617323 |
| 17433412 | Zbtb48        | 0.512874779  | 0.01163515  |
| 17347139 | Galnt14       | 0.4893331    | 0.011642002 |
| 17275470 |               | -0.784103521 | 0.011642024 |
| 17453513 | Dnajc30       | 0.61318776   | 0.011650015 |

|          |               |              |             |
|----------|---------------|--------------|-------------|
| 17359698 | Scd4          | -0.66985554  | 0.011664932 |
| 17262915 | Ccdc69        | -0.548192659 | 0.011694511 |
| 17432341 | Efhd2         | -0.703563537 | 0.011694511 |
| 17372035 | Hoxd13        | -0.632455034 | 0.011694511 |
| 17482907 | Hs3st4        | -0.689639755 | 0.011694511 |
| 17237564 | Mdm1          | 0.718252622  | 0.011694511 |
| 17512275 | Nae1          | 0.477428945  | 0.011694511 |
| 17493571 | Tsku          | -0.562257774 | 0.011694511 |
| 17282104 | Atp6v1d       | 0.70179766   | 0.011708185 |
| 17411103 | Lphn2         | 0.479647606  | 0.011708185 |
| 17243017 |               | -1.049380071 | 0.011708185 |
| 17551139 |               | -1.486259286 | 0.011725254 |
| 17307550 | Ints6         | 0.585082055  | 0.011732946 |
| 17230273 | 4930527J03Rik | -0.997981868 | 0.011739248 |
| 17544102 | Gm10452       | 0.689269185  | 0.011739248 |
| 17357688 | Ms4a6b        | -1.029534189 | 0.011739248 |
| 17451251 | Myo18b        | -0.599759875 | 0.011739248 |
| 17237280 | Phlda1        | -0.537592053 | 0.011739248 |
| 17457802 | Tcrb-J        | -0.596721103 | 0.011739248 |
| 17220752 |               | -1.180269737 | 0.011739248 |
| 17461739 | Fancd2        | 1.114040978  | 0.011744796 |
| 17355286 | Rab27b        | 0.678604772  | 0.011744796 |
| 17346503 | Tubb4a        | 0.971560625  | 0.011745574 |
| 17381084 | Prpf6         | 0.591427766  | 0.011763503 |
| 17262141 | Timd2         | -0.638872633 | 0.011764673 |
| 17316725 | Slc25a32      | 0.690445929  | 0.011767956 |
| 17341698 |               | 0.939980221  | 0.011768482 |
| 17290173 | Hmgcs1        | 0.604445054  | 0.011782864 |
| 17547682 | Sdc1          | 0.468483333  | 0.011786414 |
| 17328432 | Mcm4          | 0.86540959   | 0.011788181 |
| 17388293 | Dgkz          | -0.639969173 | 0.011789405 |
| 17410455 | Gstcd         | 0.441140328  | 0.011789405 |
| 17332568 | Tmprss2       | 1.130294079  | 0.011789405 |
| 17402572 | Cfi           | -1.038878263 | 0.01180418  |
| 17207595 |               | 1.733277213  | 0.011811511 |
| 17392621 | Gm10750       | -0.549664986 | 0.011845607 |
| 17547327 |               | -0.599095211 | 0.011850439 |
| 17206191 |               | 0.824811659  | 0.011850439 |
| 17322541 | Dnaja3        | -0.573822057 | 0.011854189 |
| 17394036 | Fitm2         | 0.507254454  | 0.011856874 |
| 17303538 | Gm5087        | -0.520784313 | 0.011856874 |
| 17492509 | Rccd1         | 0.67557579   | 0.011856874 |
| 17511450 | Siah1a        | 0.869640521  | 0.011856874 |

|          |               |              |             |
|----------|---------------|--------------|-------------|
| 17513209 | Kars          | 0.62265299   | 0.011863638 |
| 17498892 | Abhd13        | 0.640335256  | 0.011873031 |
| 17289699 | Ercc8         | 0.729489166  | 0.01190311  |
| 17266466 | Tmem199       | 0.88907236   | 0.01190311  |
| 17548477 |               | 0.699848132  | 0.011916315 |
| 17332341 |               | 0.89674405   | 0.01192071  |
| 17464291 | Fgfr1op2      | 0.456980157  | 0.011960879 |
| 17473459 | Zfp580        | -0.731404141 | 0.011965697 |
| 17270431 | Gm20511       | -0.537230705 | 0.01197805  |
| 17418465 | Grik3         | 0.825203312  | 0.01197805  |
| 17232560 | Hdac2         | 0.59531775   | 0.01197805  |
| 17467556 | Rpia          | 0.600635324  | 0.012006412 |
| 17289635 | Srek1ip1      | 0.524023799  | 0.012006797 |
| 17278799 |               | 1.173751449  | 0.012029265 |
| 17329380 | Rfc4          | 0.67889664   | 0.012032065 |
| 17289717 | Elovl7        | 0.744965863  | 0.012041057 |
| 17313705 | Parvb         | 0.841673379  | 0.01204306  |
| 17290301 | Akr1e1        | 0.570082395  | 0.012055309 |
| 17445044 | B3galtl       | 0.806249608  | 0.012055309 |
| 17494449 | LOC637657     | 0.593255943  | 0.012055309 |
| 17522698 | Ubp1          | 0.657376557  | 0.012058682 |
| 17353121 | Zfp191        | 0.582977097  | 0.012074503 |
| 17533939 | Gmcl1l        | -0.741192932 | 0.012083652 |
| 17310652 | Zfp622        | 0.592012107  | 0.012083652 |
| 17300368 |               | 0.49039587   | 0.012087772 |
| 17301440 | Ccdc25        | 0.76960844   | 0.012094017 |
| 17458150 | Zfp956        | 0.82210545   | 0.012094017 |
| 17273652 | Dnmt3a        | -0.527607114 | 0.012094268 |
| 17348990 | Elp2          | 0.533427783  | 0.012102944 |
| 17452294 | Sh2b3         | -0.604487049 | 0.012109104 |
| 17249700 | 3230401D17Rik | 0.92688748   | 0.012110351 |
| 17254289 | Wfdc17        | -0.958064282 | 0.012110351 |
| 17210273 |               | 0.794488068  | 0.012130692 |
| 17210295 |               | 0.794488068  | 0.012130692 |
| 17342686 | LOC101055719  | -0.867619873 | 0.012139683 |
| 17478998 | Vimp          | 0.576132006  | 0.012178951 |
| 17548340 | Atp6v1g1      | 0.87928852   | 0.012179176 |
| 17401970 | Olfm3         | 0.673177078  | 0.012179176 |
| 17483258 | Zfp771        | -0.516963902 | 0.012179176 |
| 17451126 | Ep400         | 0.513865799  | 0.012194064 |
| 17260396 | Gm11974       | 0.93904446   | 0.012198514 |
| 17327487 | Gm15341       | -0.752952906 | 0.012206899 |
| 17238731 |               | -0.6289907   | 0.012236259 |

|          |               |              |             |
|----------|---------------|--------------|-------------|
| 17340657 | Gm9992        | -0.678560528 | 0.012276074 |
| 17336959 |               | 1.206994367  | 0.012277412 |
| 17514930 | Olfr851       | -0.594914111 | 0.012277864 |
| 17202369 |               | -0.713158758 | 0.012277864 |
| 17458723 | Wipf3         | -0.710046259 | 0.012282738 |
| 17547509 | Gm1553        | -0.827417311 | 0.012294914 |
| 17210353 |               | 1.74332269   | 0.01230067  |
| 17260668 | Grb10         | -0.684519706 | 0.012301097 |
| 17475212 |               | -0.974393891 | 0.012312537 |
| 17252497 | Atp2a3        | -0.521544832 | 0.012313139 |
| 17437923 | Tmem33        | 0.511795567  | 0.012313139 |
| 17308686 | Cog3          | 0.616775587  | 0.012329759 |
| 17396966 | D3Ertd254e    | 1.224840727  | 0.012330671 |
| 17372185 | Rbm45         | 0.856988393  | 0.012330671 |
| 17337031 | Gm16181       | -0.581214437 | 0.012347743 |
| 17499784 | Gm15315       | -0.643974891 | 0.012353947 |
| 17510351 | Tmem221       | -0.564676395 | 0.012353947 |
| 17208563 |               | 1.444844271  | 0.012353947 |
| 17492051 | Arrdc4        | 0.515790794  | 0.01236436  |
| 17536566 | Kif4          | 0.778733124  | 0.01236436  |
| 17339864 | Ndufaf7       | 0.502277062  | 0.01236436  |
| 17388999 | Prrg4         | 0.723368412  | 0.01236436  |
| 17388406 | Slc35c1       | 0.535598659  | 0.01236436  |
| 17432038 | Padi3         | -1.267484252 | 0.012364876 |
| 17490899 | Fgf21         | 0.716991198  | 0.01237562  |
| 17355728 | Mir5127       | -1.004564111 | 0.01237562  |
| 17300360 | Pabpn1        | 0.490073876  | 0.01237562  |
| 17262353 |               | 0.597574005  | 0.01237562  |
| 17336939 | Abhd16a       | 0.793045196  | 0.012408431 |
| 17347440 | 4930429F11Rik | -0.737216172 | 0.012424613 |
| 17546917 | Sry           | -0.655611705 | 0.012430498 |
| 17549498 | Taf13         | 0.671670107  | 0.012431019 |
| 17328000 | Usp7          | 0.567503356  | 0.012451059 |
| 17228362 | BC034090      | -0.66372148  | 0.012498652 |
| 17367278 | Commd3        | 0.53106285   | 0.012512033 |
| 17259546 | Gm11775       | -0.835767931 | 0.012512033 |
| 17287715 | B4galt7       | 0.579140778  | 0.012525047 |
| 17356339 | Brms1         | 0.443440557  | 0.012530274 |
| 17246577 | Pik3ip1       | 0.49959414   | 0.012536831 |
| 17392151 | Jag1          | 1.159707174  | 0.012543866 |
| 17403811 | Lrriq3        | 0.542666806  | 0.012543866 |
| 17340120 | Ppm1b         | 0.543759691  | 0.012543866 |
| 17471828 | Klra2         | -0.610503717 | 0.012548504 |

|          |               |              |             |
|----------|---------------|--------------|-------------|
| 17257612 | Cep95         | 0.479896769  | 0.012591858 |
| 17365250 | Mgea5         | 0.477028614  | 0.012591858 |
| 17543742 |               | -1.368196129 | 0.012591858 |
| 17364622 | Tm9sf3        | 0.492659726  | 0.012593854 |
| 17397740 | Mab21l1       | 1.75101417   | 0.012601719 |
| 17508063 | Polb          | 0.459602343  | 0.012606267 |
| 17346338 | Vmac          | -0.541434049 | 0.012606267 |
| 17550619 |               | -1.390653206 | 0.012608773 |
| 17357559 |               | -1.094090088 | 0.012609793 |
| 17246110 | Gm17201       | -0.721359317 | 0.012612813 |
| 17202367 |               | 1.55865563   | 0.012612813 |
| 17267172 |               | -0.516853797 | 0.012622961 |
| 17401414 | Gm5547        | -0.638084883 | 0.012626486 |
| 17240357 | Gtf3c6        | 0.667408141  | 0.012626486 |
| 17298014 | Hesx1         | -0.535384128 | 0.012626486 |
| 17550611 |               | -1.5043881   | 0.012626649 |
| 17250852 | B130011K05Rik | -0.713674441 | 0.012640072 |
| 17349731 | Tmco6         | 0.537674208  | 0.012640072 |
| 17341214 | Prdm9         | 0.756260505  | 0.012641757 |
| 17200969 |               | 0.767190605  | 0.012641757 |
| 17511509 | Brd7          | 0.446960036  | 0.012645936 |
| 17323061 | Rrn3          | 0.467727394  | 0.012658335 |
| 17492745 | Rps17         | 1.075650535  | 0.012662218 |
| 17506846 | Sprtn         | 0.51233527   | 0.012668833 |
| 17391993 | Gm14095       | -0.71027281  | 0.01268484  |
| 17438749 | Amtn          | 1.086823519  | 0.012686231 |
| 17266751 | Gm17268       | -0.714512039 | 0.012686231 |
| 17405746 | Rarres1       | 0.843254392  | 0.012686231 |
| 17291704 | Serpnb1c      | -0.776093006 | 0.012686231 |
| 17456839 | n-R5s161      | -1.204334908 | 0.012688467 |
| 17507355 | Lig4          | 0.602184237  | 0.012699048 |
| 17548145 | Atp6v1g1      | 0.873209218  | 0.012704729 |
| 17214075 | Smarcal1      | 0.629804249  | 0.012709344 |
| 17208013 |               | 1.257962503  | 0.012709344 |
| 17207977 |               | 1.282907191  | 0.012709344 |
| 17233306 | Slc35f1       | 1.266673665  | 0.012710942 |
| 17202097 |               | -0.830913542 | 0.012710942 |
| 17299158 | LOC100044625  | -1.012317247 | 0.012714801 |
| 17463971 | n-R5s168      | -0.959200656 | 0.012714801 |
| 17265393 | Nup88         | 0.592948362  | 0.012715866 |
| 17231600 | Mir5104       | -0.544559223 | 0.012736269 |
| 17255026 | Trim25        | 1.355213683  | 0.012736269 |
| 17483383 | Snora30       | -0.448657099 | 0.012745585 |

|          |               |              |             |
|----------|---------------|--------------|-------------|
| 17440667 | Tpst2         | -0.509771096 | 0.012747781 |
| 17424034 | 4933428C19Rik | -0.575793792 | 0.012748864 |
| 17510685 | Ednra         | 0.801993292  | 0.012759726 |
| 17541946 | Mir504        | -0.690948047 | 0.012762099 |
| 17428553 | Rad54l        | 0.990614534  | 0.012762099 |
| 17399549 | 4933434E20Rik | 0.585249157  | 0.012770403 |
| 17237751 | BC048403      | 1.099720618  | 0.012775776 |
| 17338747 | Uhrf1         | 0.985720063  | 0.012787916 |
| 17304049 | Dlg5          | -0.64888749  | 0.012799004 |
| 17427860 | Acot11        | -0.509918723 | 0.012801844 |
| 17402895 | Ube2d3        | 0.475261327  | 0.012801844 |
| 17200127 |               | -0.976108326 | 0.012801844 |
| 17324680 |               | -0.607109585 | 0.012801844 |
| 17335142 | Gm15420       | -0.738143717 | 0.01280189  |
| 17269368 | Krt19         | 0.53809503   | 0.012806563 |
| 17537713 |               | 0.973193788  | 0.012806563 |
| 17215750 | Klhl30        | -0.601847788 | 0.012816747 |
| 17330407 | Gm17103       | 0.769063948  | 0.012824232 |
| 17446643 | Hadha         | 0.596866505  | 0.012832989 |
| 17522488 | Prss46        | -0.644617311 | 0.012832989 |
| 17486136 | Zfp954        | 0.84757388   | 0.012832989 |
| 17521376 | Nprl2         | 0.555714652  | 0.01284533  |
| 17379003 | 9130015L21Rik | -0.539290781 | 0.012847097 |
| 17236077 | Ric8b         | 0.732264733  | 0.012857376 |
| 17302362 | Bora          | 0.696605768  | 0.012860892 |
| 17458323 | Gm5111        | -0.439952503 | 0.012869957 |
| 17490452 | Ap2a1         | -0.55125103  | 0.012885007 |
| 17256959 | Grn           | -0.566589296 | 0.012885007 |
| 17406817 | Lamtor2       | 0.515643479  | 0.012885007 |
| 17466758 | Mir148a       | -0.538324503 | 0.012885007 |
| 17427155 | Cdkn2b        | -0.600028498 | 0.012886365 |
| 17433810 | Gm16023       | 0.726706887  | 0.012891372 |
| 17328132 | Txndc11       | 0.549304552  | 0.012892311 |
| 17467323 | Il12rb2       | -0.558057262 | 0.012898157 |
| 17316043 | Npr3          | 1.096155478  | 0.012898157 |
| 17411727 | Gdf6          | -1.028224493 | 0.012906161 |
| 17435267 | Nupl2         | 0.696688758  | 0.012913466 |
| 17395852 | Arfrp1        | 0.628414415  | 0.012930262 |
| 17402052 | Sass6         | 1.36883171   | 0.012930262 |
| 17467806 | Tcf7l1        | 0.691755951  | 0.012930262 |
| 17467529 |               | -0.819716234 | 0.012930262 |
| 17470196 | Ankrd26       | 0.610625683  | 0.012936431 |
| 17538827 |               | -0.957407192 | 0.012940938 |

|          |               |              |             |
|----------|---------------|--------------|-------------|
| 17298407 | Bap1          | 0.608009789  | 0.012947377 |
| 17500551 | Mfhas1        | -0.546479424 | 0.012947377 |
| 17254153 | Slfn5         | -0.874058704 | 0.012947377 |
| 17351838 |               | 0.481221332  | 0.012947377 |
| 17499744 | Defa22        | -0.531614169 | 0.012962555 |
| 17286515 | Prpf4b        | 0.645442328  | 0.012965588 |
| 17506502 | Rpl13         | -0.676446576 | 0.012966976 |
| 17488325 | 1700049G17Rik | 0.865918249  | 0.012971065 |
| 17509629 | Sc4mol        | 0.598693129  | 0.012971065 |
| 17318249 | Fam83h        | 0.445505214  | 0.012980897 |
| 17396544 | Mir551b       | -0.876842759 | 0.012981999 |
| 17245171 | Cct2          | 0.569403636  | 0.012992337 |
| 17268255 | Igf2bp1       | 0.999590194  | 0.013007233 |
| 17514170 | Pcnx12        | -0.566165137 | 0.013007233 |
| 17515196 | Qtrt1         | 0.6408452    | 0.013007233 |
| 17263673 | Shmt1         | 0.724255219  | 0.013007233 |
| 17203419 |               | 2.117501574  | 0.013007233 |
| 17233739 |               | 0.49981963   | 0.013007233 |
| 17523188 |               | -0.88886463  | 0.013007233 |
| 17300018 |               | -0.529075728 | 0.013007233 |
| 17210599 |               | -2.390718784 | 0.013007233 |
| 17491529 | lpw           | 0.799118864  | 0.013008002 |
| 17256332 | Krtap31-2     | -0.610408484 | 0.013008002 |
| 17545605 | Prdx4         | 0.437004519  | 0.013008002 |
| 17532615 | mt-Tk         | -0.906296848 | 0.013008272 |
| 17547949 | Gm10808       | -1.326462483 | 0.013017306 |
| 17370309 | Ptgs1         | -1.20950775  | 0.013017306 |
| 17438716 | Cabs1         | -0.78997981  | 0.013039825 |
| 17542662 | Ubl4          | 0.591611986  | 0.013039825 |
| 17518809 | Gm19299       | -0.817068058 | 0.013045151 |
| 17285644 | Zscan12       | 0.839578173  | 0.013053799 |
| 17332342 |               | 0.597477985  | 0.013054835 |
| 17421545 | Nppa          | 0.897243597  | 0.013058147 |
| 17541736 | Plac1         | -0.472752614 | 0.013063851 |
| 17238892 |               | -0.734969765 | 0.013063851 |
| 17200003 |               | 1.16043506   | 0.013069914 |
| 17274448 | Cpsf3         | 0.556660791  | 0.013077757 |
| 17444806 | Rasl11a       | -1.569267149 | 0.013079902 |
| 17445775 | Rsb1l1        | 0.604235939  | 0.013079902 |
| 17300227 | Traj11        | -0.957993722 | 0.013088758 |
| 17213336 | Bmpr2         | -0.690780746 | 0.013097636 |
| 17324303 |               | -1.042466142 | 0.013098461 |
| 17290913 | Gpx5          | -0.508048904 | 0.01310053  |

|          |               |              |             |
|----------|---------------|--------------|-------------|
| 17237132 | Lin7a         | 0.796956969  | 0.01310053  |
| 17341697 |               | 0.609849108  | 0.013102607 |
| 17517544 | Rcn2          | 0.576825089  | 0.013102812 |
| 17297459 | 2810402E24Rik | 0.572506119  | 0.013103335 |
| 17548825 | Gm378         | -0.485461446 | 0.013103335 |
| 17468018 | Hk2           | 0.794591101  | 0.013103335 |
| 17537347 | Tgif2lx1      | -0.455301913 | 0.013103335 |
| 17540741 | Gm14527       | 0.872074433  | 0.013115732 |
| 17300251 | Abhd4         | 0.583044065  | 0.013122113 |
| 17285000 | Klf6          | 0.541927343  | 0.013135891 |
| 17452378 | Rad9b         | 1.043451577  | 0.013145589 |
| 17223412 | Fam126b       | 0.633422512  | 0.013147592 |
| 17387622 | Olf1016       | -0.649345614 | 0.013147592 |
| 17476609 | Scgb1b3       | -0.468757933 | 0.013150506 |
| 17228667 | Pappa2        | -2.174365804 | 0.01315284  |
| 17315500 | Hoxc10        | -1.020968911 | 0.013165648 |
| 17290420 | Zmynd11       | 0.587480926  | 0.013165648 |
| 17252995 | Slc43a2       | -0.683656347 | 0.013165853 |
| 17208361 |               | -0.605914052 | 0.013203054 |
| 17200497 |               | 1.151994694  | 0.013210226 |
| 17515402 | Cnn1          | -0.634637426 | 0.013212623 |
| 17353378 | Epb4.1l4a     | 0.7196798    | 0.013212623 |
| 17379314 | Wisp2         | -0.604571711 | 0.013221859 |
| 17517907 | 6030419C18Rik | -0.574802657 | 0.013230337 |
| 17443996 | D830046C22Rik | -0.642562009 | 0.013230419 |
| 17397462 | Rab33b        | 0.554405255  | 0.013230419 |
| 17417336 | Kncn          | -0.528759652 | 0.013234166 |
| 17377816 | Mylk2         | -0.486556401 | 0.013234166 |
| 17446060 | Al506816      | 1.201864789  | 0.013247822 |
| 17358598 | Ii33          | 0.782594037  | 0.013247822 |
| 17533665 | Usp11         | 0.963202267  | 0.013265885 |
| 17518672 | Fam96a        | 0.509470503  | 0.013266995 |
| 17303804 | Anxa7         | 0.496697433  | 0.013285467 |
| 17229330 | 5330438I03Rik | -0.672249376 | 0.013287843 |
| 17532639 | mt-Ta         | 1.129821883  | 0.013288231 |
| 17373930 | 0610012H03Rik | -0.597000834 | 0.013290736 |
| 17532613 | COX2          | -0.50713723  | 0.013290736 |
| 17417162 | Gm12835       | -0.621918174 | 0.013290736 |
| 17423265 | Dpy19l4       | 0.520401696  | 0.013301107 |
| 17303333 | Gm3476        | 0.845433055  | 0.013301107 |
| 17371941 | Cdca7         | 0.784301147  | 0.013302091 |
| 17305254 |               | -0.860859027 | 0.01330605  |
| 17259311 | 0610009L18Rik | -0.65703602  | 0.013309665 |



|          |               |              |             |
|----------|---------------|--------------|-------------|
| 17270117 |               | -1.20561522  | 0.013314911 |
| 17401447 | Ovgp1         | 0.979335111  | 0.013319215 |
| 17386639 | Lnp           | 0.775509098  | 0.01332214  |
| 17421283 | Gm13123       | -0.499967922 | 0.013331292 |
| 17480407 | Clns1a        | 0.481394699  | 0.013340516 |
| 17283014 | Gtf2a1        | 0.554589511  | 0.013340516 |
| 17469572 | Sumf1         | 0.734094918  | 0.013358491 |
| 17298379 | Tnnc1         | 0.504974444  | 0.01335898  |
| 17237978 | Ddit3         | 0.636168358  | 0.013388941 |
| 17214027 | B930094L07Rik | 0.630864753  | 0.013389596 |
| 17262575 | Ube2b         | 0.580394622  | 0.013400418 |
| 17202165 |               | 1.002178866  | 0.013400418 |
| 17480534 | Gdpd5         | 0.59386139   | 0.01341926  |
| 17402936 | Slc39a8       | 0.720382958  | 0.01342743  |
| 17476219 | Zfp420        | 0.812742973  | 0.013428035 |
| 17396878 | Sox2          | 0.751460911  | 0.013434586 |
| 17513076 | Mkl1          | -0.572345328 | 0.013450178 |
| 17239354 | Stx11         | 0.698860143  | 0.013450178 |
| 17535972 | Vbp1          | 0.504557794  | 0.013450178 |
| 17484731 | Pkp3          | 0.580097009  | 0.013450555 |
| 17209097 |               | -1.238980115 | 0.013453673 |
| 17395512 | Lama5         | -0.844615267 | 0.013456404 |
| 17344242 | Apom          | -1.225252831 | 0.013484133 |
| 17280062 | Lpin1         | 0.736293824  | 0.013484133 |
| 17512776 | 4922502B01Rik | 0.488020373  | 0.013498388 |
| 17322545 | Dnaja3        | 0.551068668  | 0.013500031 |
| 17316402 | Nipal2        | 1.247871434  | 0.013515915 |
| 17461312 | Trnt1         | 0.547127467  | 0.013515915 |
| 17400800 |               | -1.119544193 | 0.013515915 |
| 17443261 | Nsun5         | 0.795535437  | 0.013531224 |
| 17389820 | Dnajc17       | 0.54967467   | 0.013535393 |
| 17260261 | Camk2b        | 0.699209877  | 0.013537548 |
| 17495549 | Itpril2       | -0.997306606 | 0.013578207 |
| 17546935 | Rbmy          | -0.633604094 | 0.013578207 |
| 17546944 | Rbmy          | -0.633604094 | 0.013578207 |
| 17376560 | AV099323      | 0.623622038  | 0.013604946 |
| 17249702 | Fnip1         | 0.598000026  | 0.013604946 |
| 17303117 | Gm3696        | 1.102956175  | 0.013604946 |
| 17320240 | 1810021B22Rik | -0.573462042 | 0.01361456  |
| 17451734 | 4930430O22Rik | -0.714162984 | 0.013616136 |
| 17300697 | Khyn1         | 0.606275107  | 0.013616136 |
| 17253150 | Rnmtl1        | 0.555600765  | 0.013617961 |
| 17323888 | Eif2b5        | 0.507113661  | 0.013619736 |

|          |               |              |             |
|----------|---------------|--------------|-------------|
| 17232055 | Sgk1          | 0.635119266  | 0.013625134 |
| 17202661 |               | -0.864520745 | 0.013634321 |
| 17201277 |               | -0.883647737 | 0.013634321 |
| 17470150 | Bms1          | 0.767074948  | 0.013639314 |
| 17512171 | Rplp0         | -0.53380439  | 0.013658918 |
| 17466805 | Hoxa2         | 1.268001707  | 0.013660422 |
| 17463140 | Mrpl51        | 0.428765475  | 0.013662541 |
| 17282905 | Snw1          | 0.432184954  | 0.013662541 |
| 17504431 | Cklf          | 1.087006484  | 0.013664718 |
| 17537982 | Zcchc18       | 0.634361612  | 0.013664718 |
| 17495306 |               | 0.454096001  | 0.013668013 |
| 17324683 |               | -0.632058908 | 0.01368149  |
| 17543396 | Eda2r         | 0.61699108   | 0.013688068 |
| 17400418 | Mcl1          | 0.444963827  | 0.013688068 |
| 17290852 | Trgv2         | -0.612912894 | 0.013688068 |
| 17252399 | Ube2g1        | 0.504589367  | 0.013688068 |
| 17316185 |               | -0.576201259 | 0.013688068 |
| 17250117 | Gm12258       | 0.982768052  | 0.013706266 |
| 17225833 | 4930533P14Rik | -0.523503781 | 0.013714861 |
| 17210069 |               | -0.991038274 | 0.013714861 |
| 17266496 |               | -0.62420164  | 0.013742654 |
| 17474934 | Lypd5         | 1.142569149  | 0.013744604 |
| 17237984 | Arhgap9       | -0.513914712 | 0.013765422 |
| 17250582 | Aldh3a2       | 0.7368548    | 0.013770006 |
| 17334685 | Tekt4         | -0.524484606 | 0.013770006 |
| 17204591 |               | 2.138662236  | 0.013770006 |
| 17240901 | D630037F22Rik | 0.674668467  | 0.013778464 |
| 17478263 | Tmem86a       | -1.011109818 | 0.013794027 |
| 17350364 | Cdo1          | 0.91921714   | 0.013798597 |
| 17306816 | Tgm1          | 0.803992395  | 0.013798597 |
| 17221765 | Gm19673       | -0.469976642 | 0.013807567 |
| 17366756 | Mir669g       | 0.786509806  | 0.013807567 |
| 17550631 |               | -1.228984962 | 0.013807567 |
| 17534408 | Xiap          | 0.432133159  | 0.013811013 |
| 17395973 | 1110015O18Rik | 0.883366782  | 0.013811098 |
| 17516074 | Esam          | 0.607602618  | 0.013811098 |
| 17216296 | Gm17634       | -0.454168509 | 0.013811098 |
| 17464128 | Golt1b        | 0.473411673  | 0.013811098 |
| 17427213 |               | -0.879879783 | 0.013811098 |
| 17424937 | Exosc3        | 0.559243208  | 0.013815829 |
| 17234948 | Fgf22         | -0.8008727   | 0.013819057 |
| 17355437 |               | 0.677598995  | 0.013819057 |
| 17343527 | Zfp763        | 0.568847845  | 0.013824211 |

|          |               |              |             |
|----------|---------------|--------------|-------------|
| 17233716 | Npffr1        | -0.776144607 | 0.013833541 |
| 17287876 |               | -0.664267087 | 0.013838404 |
| 17449609 | Cdkl2         | 0.627850996  | 0.013847215 |
| 17343164 | Tff3          | -0.787958583 | 0.013874323 |
| 17502860 | Rnf150        | -1.026192636 | 0.013876718 |
| 17447150 | Letm1         | 0.556401933  | 0.013877834 |
| 17444876 | Pomp          | 0.649377992  | 0.013877834 |
| 17546345 | Rbmy          | -0.565739642 | 0.013892907 |
| 17533332 | Gm4906        | -0.823110042 | 0.013893634 |
| 17489251 | Haus5         | 0.881673235  | 0.013893634 |
| 17418483 | Grik3         | -0.506723618 | 0.013909139 |
| 17548411 | Hpse          | -0.597323882 | 0.013909139 |
| 17464110 | Pyroxd1       | 0.62286742   | 0.013909139 |
| 17340522 | Serac1        | -0.506723618 | 0.013909139 |
| 17392625 |               | -0.648699143 | 0.013909139 |
| 17253191 | Blmh          | 0.423490625  | 0.013909776 |
| 17208381 |               | 1.532109448  | 0.013940645 |
| 17235320 | Reep6         | 1.042894243  | 0.013961379 |
| 17474574 | Ppp1r13l      | 0.500538614  | 0.013966008 |
| 17357558 |               | -0.774478335 | 0.013966008 |
| 17509359 |               | -1.326697236 | 0.013966008 |
| 17205221 |               | -1.065786506 | 0.013966008 |
| 17209411 |               | -1.065786506 | 0.013966008 |
| 17550420 |               | -1.2955212   | 0.013966008 |
| 17399574 | 1700094D03Rik | 0.760274864  | 0.013971249 |
| 17370659 | Kif5c         | 1.163175028  | 0.01397679  |
| 17428142 | Osbpl9        | 0.572426588  | 0.01397679  |
| 17309011 |               | -0.492227635 | 0.01397679  |
| 17509923 | Mau2          | 0.656290637  | 0.013988235 |
| 17306477 | Slc7a8        | -1.337735743 | 0.013989849 |
| 17544098 | Gm732         | -0.730088225 | 0.014005383 |
| 17361164 | Rad9a         | 1.034232698  | 0.014005383 |
| 17448753 |               | -0.770583819 | 0.014005383 |
| 17366660 | Kin           | 0.544281008  | 0.014007022 |
| 17384753 | Golga1        | 0.66451039   | 0.014010898 |
| 17323401 | Gm15585       | -0.6299931   | 0.014011379 |
| 17525661 | Tbrg1         | 0.470151937  | 0.014011379 |
| 17364543 | Aldh18a1      | 0.432278173  | 0.014024846 |
| 17359366 | Entpd1        | 0.432278173  | 0.014024846 |
| 17357233 |               | 0.622241934  | 0.014035313 |
| 17392730 | Abhd12        | -0.525493271 | 0.014037264 |
| 17282171 | Zfyve26       | -0.468450454 | 0.014039057 |
| 17232281 |               | -0.68006556  | 0.014039057 |

|          |                |              |             |
|----------|----------------|--------------|-------------|
| 17416427 | Tmem59         | 0.599562683  | 0.014043675 |
| 17227570 | Nek7           | 0.5484635    | 0.01406435  |
| 17245053 | Thap2          | 0.709635001  | 0.014073371 |
| 17548520 | Gm5576         | 0.563591055  | 0.014075839 |
| 17513061 | Rfwd3          | 0.751935849  | 0.014077693 |
| 17208021 |                | 0.858364079  | 0.014085542 |
| 17366204 | LOC100040974   | -0.474378165 | 0.014089133 |
| 17202795 |                | -1.04668942  | 0.014091521 |
| 17477498 | Fam71e1        | -0.574215928 | 0.014100754 |
| 17484909 | Pnpla2         | -0.469092629 | 0.014100754 |
| 17268313 | 0610040B09Rik  | -0.554329388 | 0.014111199 |
| 17447963 | Kcnip4         | 0.715454148  | 0.014129374 |
| 17285799 | Vmn1r219       | -0.57667117  | 0.014129374 |
| 17240746 | 4933411G06Rik  | -0.570669245 | 0.014135143 |
| 17412404 | Casp8ap2       | 0.666848144  | 0.014135143 |
| 17218147 |                | -0.471989156 | 0.014135143 |
| 17461888 | Hrh1           | -0.617398842 | 0.014144062 |
| 17233835 | Rufy2          | 0.774760145  | 0.014146577 |
| 17323297 | Cebpd          | -0.72226066  | 0.014154244 |
| 17415136 | Adamts1        | -0.687160571 | 0.014181235 |
| 17242578 | Ppap2c         | 0.595298169  | 0.014194528 |
| 17501544 | Npy1r          | 0.601349796  | 0.014199263 |
| 17263692 | Tmem11         | 0.507320059  | 0.014199263 |
| 17499874 | Thsd1          | -0.663383469 | 0.014225531 |
| 17452818 | Sbno1          | 0.517919903  | 0.014239427 |
| 17465620 | Podxl          | 0.793910176  | 0.014243989 |
| 17369986 | Pthr1          | -0.585502618 | 0.014251763 |
| 17521902 | Ip6k2          | 0.594110824  | 0.014270634 |
| 17517554 | Pstpip1        | -0.528674716 | 0.014274451 |
| 17514320 | 2610044O15Rik8 | 0.774701437  | 0.014280805 |
| 17260244 | Gck            | -0.416107796 | 0.014300371 |
| 17316432 | Mir599         | -0.804595689 | 0.014301119 |
| 17515045 | Ppan           | 0.612798905  | 0.014301119 |
| 17364813 | Avpi1          | 0.966208289  | 0.01430648  |
| 17343580 | Hnrnpm         | 0.783374152  | 0.014319446 |
| 17363374 | Ostf1          | 0.503309534  | 0.014332245 |
| 17493875 | P2ry2          | 0.86253426   | 0.014332717 |
| 17532662 |                | 0.861215829  | 0.014351506 |
| 17269870 | Aarsd1         | 0.529602129  | 0.014355892 |
| 17233065 |                | 1.335687301  | 0.014355892 |
| 17546743 |                | -0.713848773 | 0.014355892 |
| 17386377 | Mettl8         | 0.65052702   | 0.014376763 |
| 17502191 | Mrpl34         | 0.525657967  | 0.014378016 |

|          |               |              |             |
|----------|---------------|--------------|-------------|
| 17310565 | Cdh18         | 0.676099431  | 0.014396698 |
| 17281963 | Wdr89         | 0.57319419   | 0.014403228 |
| 17296715 | Gm3373        | 0.573036902  | 0.014404289 |
| 17241206 | Pald1         | -0.606335021 | 0.014404289 |
| 17260837 |               | -0.570736014 | 0.014404289 |
| 17499773 | Gm21002       | -0.775990298 | 0.014408095 |
| 17468157 | Tet3          | -0.598723267 | 0.014409043 |
| 17308796 | Gm1587        | -0.526932801 | 0.01443001  |
| 17550364 | 5430416N02Rik | 0.631569109  | 0.014438972 |
| 17333977 | Zfp229        | 1.125800859  | 0.014454381 |
| 17505367 | Txn14b        | 0.652694356  | 0.014457926 |
| 17405174 | Cog6          | 0.694606695  | 0.014459232 |
| 17305653 | Gnpnat1       | 0.512938315  | 0.014460912 |
| 17396078 | Raly1         | 0.648620373  | 0.014492354 |
| 17485589 | Lilrb3        | -0.855284164 | 0.014494407 |
| 17456440 | Hyal4         | -0.53367844  | 0.014496038 |
| 17250129 | 2810021J22Rik | 0.668628701  | 0.014496136 |
| 17450918 | Crlf2         | -0.455580058 | 0.014502464 |
| 17291866 | Lym4          | 1.041923546  | 0.014502464 |
| 17259177 | Rptor         | -0.56127228  | 0.014502464 |
| 17491276 | Spty2d1       | 0.526212439  | 0.014502464 |
| 17341319 | Vmn2r108      | -1.289790578 | 0.014502464 |
| 17516194 | Vwa5a         | 0.528296453  | 0.014502464 |
| 17337197 | Cdsn          | 0.994933166  | 0.014514414 |
| 17217022 | Fam72a        | 0.949983106  | 0.01451889  |
| 17347353 | Gm6548        | -0.811567408 | 0.01451889  |
| 17350301 | Ythdc2        | 0.793311308  | 0.01451889  |
| 17414061 | Zfp189        | 0.658480845  | 0.01451889  |
| 17267430 | Gdpd1         | 0.724099171  | 0.0145252   |
| 17283565 | Serpina10     | -0.571244388 | 0.014536666 |
| 17227512 |               | -0.500589077 | 0.014536666 |
| 17236269 | Pah           | -0.51203526  | 0.014538344 |
| 17200137 |               | 1.437184403  | 0.014545556 |
| 17468172 | Dguok         | 0.609984565  | 0.014554863 |
| 17299341 | Fbxo34        | 0.61502663   | 0.014554863 |
| 17418952 | Yars          | 0.72048943   | 0.014554863 |
| 17366562 | Upf2          | 0.676005701  | 0.014557911 |
| 17278296 | Serpina3i     | -1.036741548 | 0.014578914 |
| 17255594 | Hoxb4         | -0.477910111 | 0.014589494 |
| 17257946 | Sox9          | 0.636110671  | 0.014591989 |
| 17270481 | Arhgap27      | 0.512140644  | 0.014597745 |
| 17239371 | Ltv1          | 0.468415702  | 0.014604932 |
| 17521014 | Acad11        | 0.482707143  | 0.014608472 |

|          |               |              |             |
|----------|---------------|--------------|-------------|
| 17436907 | Afap1         | -0.568596976 | 0.014614099 |
| 17282226 | Actn1         | -0.420341454 | 0.014617223 |
| 17333686 | Lix1          | 1.189252151  | 0.014636399 |
| 17312920 | Micall1       | -0.594926267 | 0.014636399 |
| 17326062 | Retnlb        | -0.688433732 | 0.014636399 |
| 17456082 |               | -0.61971421  | 0.014639238 |
| 17292855 | F12           | -0.558418591 | 0.014653549 |
| 17279239 | Tdrd9         | -0.591381924 | 0.014653549 |
| 17405355 | Tm4sf1        | -0.737386937 | 0.014653549 |
| 17201783 |               | -1.386276758 | 0.014653549 |
| 17201959 |               | -1.386276758 | 0.014653549 |
| 17418581 | Col8a2        | -0.683715711 | 0.014659952 |
| 17497584 | Caly          | 0.506231659  | 0.014687035 |
| 17491242 | Tsg101        | 0.425750578  | 0.014687035 |
| 17308473 |               | 1.10702619   | 0.014694117 |
| 17426923 | 6030471H07Rik | -0.452396532 | 0.014705225 |
| 17203655 |               | 1.36028262   | 0.014715029 |
| 17448761 |               | -0.754210332 | 0.014715029 |
| 17377013 | Dstn          | 0.455262916  | 0.014717639 |
| 17355859 | Gm16146       | -0.534730621 | 0.014717639 |
| 17509113 | Gm16351       | -0.577141031 | 0.014717639 |
| 17398023 | Gmps          | 0.535127982  | 0.014717639 |
| 17247336 | Ikzf1         | -0.616917702 | 0.014717639 |
| 17344316 | Lta           | -0.757627577 | 0.014717639 |
| 17472114 | Plbd1         | 0.792126414  | 0.014717639 |
| 17417117 | Stil          | 1.019073511  | 0.014717639 |
| 17446095 | Tomm7         | -0.550633226 | 0.014717639 |
| 17206513 |               | -1.639812456 | 0.014717639 |
| 17365162 |               | 0.606720003  | 0.014733074 |
| 17203663 |               | 1.904286083  | 0.014746853 |
| 17250734 | 2410006H16Rik | 0.524798034  | 0.014756871 |
| 17293858 | Gm10323       | -1.053979579 | 0.014756871 |
| 17471278 | Tead4         | 0.703971405  | 0.014756871 |
| 17308454 | Xpo7          | 0.577980624  | 0.014756871 |
| 17220761 |               | 1.234584055  | 0.014756871 |
| 17200123 |               | 1.383772122  | 0.014756871 |
| 17238886 |               | -0.50095445  | 0.014756871 |
| 17295032 |               | -0.652129202 | 0.014757574 |
| 17496698 | Zfp688        | 0.634242074  | 0.014758145 |
| 17331447 | Cadm2         | 0.594204268  | 0.014760588 |
| 17277063 | Rbm25         | 0.492688154  | 0.014760588 |
| 17266873 | Slfn10-ps     | -0.582936713 | 0.014762639 |
| 17549002 | Polr2k        | -0.495958845 | 0.014766949 |

|          |               |              |             |
|----------|---------------|--------------|-------------|
| 17402642 | Agxt2l1       | -0.53704611  | 0.014779791 |
| 17389034 | Rcn1          | 0.458249323  | 0.014779791 |
| 17207611 |               | 0.670686925  | 0.014779791 |
| 17415296 | Gm13283       | -0.429150962 | 0.014785178 |
| 17449645 |               | 1.16856447   | 0.014819613 |
| 17443803 | Nxpe5         | -0.859172764 | 0.014825238 |
| 17275498 | Srp54b        | 0.434001232  | 0.014840612 |
| 17539997 | Was           | -0.937341008 | 0.014840612 |
| 17449638 |               | 1.198164443  | 0.014840612 |
| 17277294 | Isca2         | 0.570271501  | 0.014851137 |
| 17437998 | Guf1          | 0.674589236  | 0.014858941 |
| 17444924 | 8430423G03Rik | -0.8414882   | 0.014868014 |
| 17225801 | Pdcd1         | -0.791421067 | 0.01487352  |
| 17429810 | Akirin1       | 0.72972296   | 0.014882119 |
| 17453129 |               | 1.460222529  | 0.014882119 |
| 17366744 | Mir669a-3     | 0.915601907  | 0.014888361 |
| 17270453 | 1700028N14Rik | -0.597891997 | 0.014894746 |
| 17271710 | Cd300lb       | -0.563757631 | 0.014894746 |
| 17280285 | Gm10330       | 0.408062862  | 0.014894746 |
| 17370332 | Olfr340       | -0.642820019 | 0.014894746 |
| 17409858 | Rwdd3         | 0.5565365    | 0.014903921 |
| 17431053 | Zdhhc18       | -0.521801611 | 0.014914274 |
| 17507799 | Angpt2        | 0.896663255  | 0.014928314 |
| 17278410 | Gskip         | 0.779248917  | 0.014928314 |
| 17487500 | LOC101056689  | 0.614435696  | 0.014942852 |
| 17362741 | Pga5          | 1.996757233  | 0.014946835 |
| 17209899 |               | -0.801508601 | 0.014946835 |
| 17417952 | LOC101055647  | -1.065426345 | 0.014949927 |
| 17364139 | Slc16a12      | 1.15711758   | 0.014957782 |
| 17446793 | Slc5a6        | 0.503813503  | 0.014957782 |
| 17517576 | Hmg20a        | 0.485730783  | 0.014960903 |
| 17204133 |               | 1.764261993  | 0.014964448 |
| 17307046 | Cenpj         | 0.552696695  | 0.014965112 |
| 17398428 |               | -0.544419136 | 0.014969324 |
| 17345862 | Gm16554       | -0.798375205 | 0.01497895  |
| 17207273 |               | 1.199592105  | 0.014981046 |
| 17240119 | D830005E20Rik | -0.571122258 | 0.014994511 |
| 17492385 | Kif7          | -0.617841537 | 0.015000277 |
| 17525727 | Olfr952       | -0.683917488 | 0.015000277 |
| 17302490 | Scel          | 0.902398752  | 0.015000277 |
| 17202381 |               | -0.538995173 | 0.015000277 |
| 17264940 | Slc35g3       | -0.726033273 | 0.015007185 |
| 17550607 |               | -1.528373779 | 0.015012942 |

|          |               |              |             |
|----------|---------------|--------------|-------------|
| 17440037 | Lpcat2b       | -0.630046667 | 0.015029286 |
| 17353219 | Rit2          | 0.965603242  | 0.015029286 |
| 17287733 | Ddx46         | 0.70531429   | 0.015034965 |
| 17309580 | Dock9         | 0.689931266  | 0.015034965 |
| 17537722 | Hnrnp2        | 0.567539743  | 0.015034965 |
| 17206159 |               | -0.861974579 | 0.015034965 |
| 17468183 | Actg2         | -0.917372862 | 0.015039889 |
| 17231801 | Reps1         | 0.697199     | 0.015039889 |
| 17306304 | Sall2         | -0.568370803 | 0.015060893 |
| 17366170 | Csf2ra        | -0.832390424 | 0.015064153 |
| 17469035 | Tmem43        | 0.861172763  | 0.015064153 |
| 17253947 | Zfp207        | 0.398419701  | 0.015064153 |
| 17470683 | 1700013D24Rik | -0.609324335 | 0.015072307 |
| 17214771 | Col4a3        | -0.582277323 | 0.015072307 |
| 17405197 | Nhlrc3        | 0.702610117  | 0.015072307 |
| 17502147 | Use1          | 0.59598001   | 0.015072307 |
| 17259513 |               | 1.445525965  | 0.015072307 |
| 17366940 |               | 1.118868907  | 0.015072307 |
| 17310368 | Adamts12      | -1.050530189 | 0.015099021 |
| 17283947 | Begain        | -0.555331709 | 0.01510655  |
| 17445755 | Phtf2         | 0.578238315  | 0.01510655  |
| 17278090 | Chga          | 0.697897486  | 0.015113749 |
| 17408696 | A130049A11Rik | 0.665849398  | 0.015116758 |
| 17275472 | Srp54b        | 0.435297524  | 0.015116758 |
| 17308388 | Sftpc         | -0.521511721 | 0.015121508 |
| 17257057 |               | 0.474884177  | 0.01514432  |
| 17344653 | Gm7030        | -0.50175986  | 0.015161057 |
| 17504601 | Ces3a         | -0.784650878 | 0.01516278  |
| 17537081 | Tlr13         | -1.552692941 | 0.01516278  |
| 17403325 | Sep15         | 0.441874893  | 0.015204843 |
| 17202463 |               | -0.693358604 | 0.015204843 |
| 17278779 |               | 1.276232073  | 0.015204843 |
| 17362521 | 5730408K05Rik | 0.581981574  | 0.01521691  |
| 17203895 |               | -0.887999787 | 0.015228064 |
| 17333023 | Tagap         | -0.60173101  | 0.015233732 |
| 17481684 | Akip1         | 0.538229737  | 0.015241328 |
| 17338388 | Trem12        | -0.842686279 | 0.015241328 |
| 17269868 |               | -0.495085055 | 0.015241328 |
| 17549514 |               | -0.497883573 | 0.015243833 |
| 17379744 |               | -0.742366624 | 0.015243833 |
| 17293318 | BC051665      | -0.615115791 | 0.015259355 |
| 17283938 |               | 1.270126813  | 0.015265497 |
| 17466798 | Hoxa1         | 0.900188654  | 0.015270368 |



|          |               |              |             |
|----------|---------------|--------------|-------------|
| 17454500 | Tmem184a      | 0.866081148  | 0.015270368 |
| 17271891 | Atp5h         | 0.91904899   | 0.015272083 |
| 17307080 | Pspc1         | 0.495515058  | 0.015274132 |
| 17500752 | Gm16193       | -0.490529713 | 0.01528184  |
| 17329527 | Mb21d2        | 0.658936946  | 0.01528641  |
| 17457753 | Gm5409        | -0.692837261 | 0.015310321 |
| 17373825 | Cd59a         | 0.512517949  | 0.015312796 |
| 17329350 | Tbccd1        | 0.782833929  | 0.015312796 |
| 17238447 |               | -0.649343693 | 0.015314671 |
| 17308182 | Chmp7         | 0.606624739  | 0.015315145 |
| 17286496 | Tubb2b        | 1.05741559   | 0.015315145 |
| 17209153 |               | -0.845951424 | 0.01533924  |
| 17362555 | Stxbp3b       | 0.930378879  | 0.015345749 |
| 17255157 | Nme1          | 1.263196247  | 0.015346609 |
| 17524760 | Kank2         | -0.664418731 | 0.015378096 |
| 17357700 | Ms4a4d        | -0.752521271 | 0.015390592 |
| 17203947 |               | 1.508654119  | 0.015399241 |
| 17414068 | Rnf20         | 0.634050681  | 0.015409063 |
| 17418439 | Snip1         | 0.545621808  | 0.015409364 |
| 17271842 | Fads6         | -0.668428957 | 0.015422486 |
| 17513525 | Gins2         | 0.602911579  | 0.015422873 |
| 17411147 | Ifi44         | 1.08917089   | 0.015422873 |
| 17201191 |               | 1.129027087  | 0.015422873 |
| 17527271 | Acsbg1        | -0.44821076  | 0.015437605 |
| 17314972 | Atf1          | 0.817976345  | 0.015437605 |
| 17383013 | Sec16a        | -0.63936648  | 0.015437605 |
| 17474315 | Ceacam11      | -0.680511366 | 0.015446936 |
| 17454335 | Zfp68         | 0.982018731  | 0.015446936 |
| 17358010 |               | 0.844462746  | 0.015477542 |
| 17486764 | Obox6         | -0.518838188 | 0.015488753 |
| 17401036 | Nhlh2         | 0.905175521  | 0.015499967 |
| 17247695 | Xpo1          | 0.552741415  | 0.015499967 |
| 17215681 | Rbm44         | -0.570638174 | 0.015503624 |
| 17412871 | Nudt2         | 0.623704338  | 0.01550774  |
| 17233736 | Sar1a         | 0.406263816  | 0.015517005 |
| 17442759 | 4930572K03Rik | -0.56280061  | 0.01551947  |
| 17512117 |               | -0.970075216 | 0.01551947  |
| 17220758 |               | 1.198971884  | 0.01551947  |
| 17204785 |               | -0.681484873 | 0.01551947  |
| 17457519 | 8030453O22Rik | -0.51212861  | 0.015531435 |
| 17287066 | Rnf144b       | 0.467692767  | 0.015531435 |
| 17225815 | St8sia4       | 0.985049578  | 0.015531435 |
| 17238936 | Syne1         | -0.63754988  | 0.015531435 |

|          |              |              |             |
|----------|--------------|--------------|-------------|
| 17300411 | Thtpa        | 0.616272406  | 0.015531435 |
| 17300209 | Traj21       | -0.609731544 | 0.015531435 |
| 17522575 |              | -0.52994127  | 0.015531435 |
| 17375742 | Ap4e1        | 0.823967857  | 0.015533749 |
| 17550817 |              | -0.497399281 | 0.015539992 |
| 17207261 |              | -0.824417674 | 0.015539992 |
| 17343176 | Tff1         | -0.827476874 | 0.015555425 |
| 17253157 | Timm22       | 0.692798812  | 0.015555944 |
| 17231423 | Akap12       | 0.680156065  | 0.015563903 |
| 17537163 | Fam46d       | -0.59439425  | 0.015563903 |
| 17420817 | Gm13028      | -0.528005913 | 0.015563903 |
| 17370209 | Gsn          | 0.640007761  | 0.015563903 |
| 17203625 |              | -0.649477579 | 0.015563903 |
| 17411869 |              | -0.54975516  | 0.015563903 |
| 17459857 | M1ap         | -0.499586613 | 0.015586038 |
| 17429288 | Olfr1329     | -0.828029883 | 0.015589016 |
| 17257654 | Gm11712      | -0.472272083 | 0.015593221 |
| 17394349 | Ncoa5        | 0.565501136  | 0.015593221 |
| 17444792 | Rpl21        | 0.68844498   | 0.015613624 |
| 17496555 | Maz          | -0.442562726 | 0.015617946 |
| 17427181 | Gm12669      | 0.702913825  | 0.01562292  |
| 17222880 | Gls          | 0.437180863  | 0.015626478 |
| 17324691 |              | -0.53761702  | 0.015644391 |
| 17516633 | Ddx6         | 0.511141923  | 0.015648079 |
| 17379884 | Gm14291      | -0.811553177 | 0.015648079 |
| 17307017 | Gzmf         | -0.612057199 | 0.015648079 |
| 17356692 | Ppp2r5b      | -0.770681494 | 0.015648079 |
| 17316493 | Rpl7a-ps3    | -0.727837679 | 0.015648079 |
| 17385924 | Scn3a        | 0.623313579  | 0.015648079 |
| 17293897 | Zfp712       | 0.888635682  | 0.015648079 |
| 17208341 |              | -0.820623944 | 0.015648079 |
| 17525599 | Ccdc15       | 0.785891361  | 0.015677376 |
| 17548356 | Gm10572      | -0.431248578 | 0.015677376 |
| 17461060 | LOC100503057 | 0.514206662  | 0.015695717 |
| 17464571 | Mir489       | -0.658510426 | 0.015710922 |
| 17444851 | D5Erttd605e  | -0.861809417 | 0.015721896 |
| 17439535 | Bmp3         | 0.546595261  | 0.015726678 |
| 17278612 | Mir342       | -0.658184869 | 0.015726678 |
| 17276714 | Mpp5         | 0.471654054  | 0.015726678 |
| 17261982 | Adra1b       | -0.434342783 | 0.01574672  |
| 17456318 | Ing3         | 0.574171492  | 0.015784528 |
| 17241968 | Smarb1       | 0.519439846  | 0.015784528 |
| 17262055 | Nipal4       | 0.792687439  | 0.015784751 |

|          |               |              |             |
|----------|---------------|--------------|-------------|
| 17506824 | Gnpat         | 0.573664719  | 0.015785511 |
| 17505927 | Atmin         | 0.529101093  | 0.015788959 |
| 17510667 | Tmem184c      | 0.563842524  | 0.015811741 |
| 17346744 | Txndc2        | -0.644204963 | 0.015811741 |
| 17524731 | Yipf2         | 0.487453352  | 0.015811741 |
| 17356425 |               | 0.796712364  | 0.015811741 |
| 17501600 | 1700125H03Rik | -0.569650824 | 0.015815632 |
| 17249423 | 9430098F02Rik | 0.841660187  | 0.015826747 |
| 17463441 | Tom1          | 0.508992837  | 0.015844379 |
| 17201437 |               | -0.511299662 | 0.015846689 |
| 17206167 |               | -0.856538034 | 0.015846989 |
| 17542516 | Hcfc1         | -0.51514226  | 0.01584942  |
| 17350081 | Kctd16        | 0.51514815   | 0.015853369 |
| 17363390 | Rorb          | 1.073028344  | 0.015861327 |
| 17469089 | Mrps25        | 0.537294123  | 0.015864192 |
| 17301113 | 4930556J02Rik | -0.566307846 | 0.015888296 |
| 17509425 |               | -0.455658698 | 0.015900522 |
| 17416243 |               | -0.502791003 | 0.015902578 |
| 17534892 | Zfp449        | 0.992682774  | 0.015903366 |
| 17265625 | Med31         | 0.649670436  | 0.015921161 |
| 17268240 | Gm11527       | -0.658070914 | 0.015937833 |
| 17212423 | Ercc5         | 0.482751737  | 0.015939221 |
| 17484098 |               | 0.656762959  | 0.015945964 |
| 17204613 |               | -0.615741292 | 0.015958385 |
| 17336681 | Tnxb          | -0.567423299 | 0.015962863 |
| 17209197 |               | -1.273936142 | 0.015962863 |
| 17460252 |               | -0.765775922 | 0.015967895 |
| 17218889 | Slc19a2       | 0.508927752  | 0.015985221 |
| 17279550 |               | -0.602802178 | 0.015988884 |
| 17201239 |               | -1.397430137 | 0.015989272 |
| 17411907 | Triqk         | 0.7774142    | 0.01600234  |
| 17403138 | Eif4e         | 0.442774221  | 0.016029445 |
| 17510428 | Fcho1         | 0.575153298  | 0.016029445 |
| 17536221 | Gm5071        | -0.598730607 | 0.016029645 |
| 17536223 | Gm5071        | -0.598730607 | 0.016029645 |
| 17209209 |               | 1.488245805  | 0.016029645 |
| 17550679 |               | -1.026114082 | 0.016029645 |
| 17412965 | Ccl21a        | -0.474257234 | 0.01604896  |
| 17413025 | Ccl21a        | -0.474257234 | 0.01604896  |
| 17413123 | Ccl21a        | -0.474257234 | 0.01604896  |
| 17434150 | Ccl21a        | -0.474257234 | 0.01604896  |
| 17360842 | Slc18a2       | -0.618848229 | 0.01604896  |
| 17317086 | Taf2          | 0.739116611  | 0.016052708 |

|          |              |              |             |
|----------|--------------|--------------|-------------|
| 17357478 | Tmem258      | 0.740330257  | 0.016079907 |
| 17245624 | Usp15        | 0.509308577  | 0.016079957 |
| 17375976 | Gm14009      | -0.500618726 | 0.016101121 |
| 17300261 | Oxa1l        | 0.47531631   | 0.016123559 |
| 17291078 | Gm11300      | -0.600474859 | 0.016175964 |
| 17262209 | Gm5431       | -0.612614394 | 0.016175964 |
| 17319289 | Josd1        | 0.452723831  | 0.016175964 |
| 17338599 | St6gal2      | 0.634154881  | 0.016175964 |
| 17264971 | Tmem102      | 1.026580134  | 0.016175964 |
| 17255258 |              | -0.997769364 | 0.016175964 |
| 17272017 |              | -0.438389956 | 0.016175964 |
| 17359926 |              | 1.257462735  | 0.016182518 |
| 17448214 | Rell1        | 0.493441703  | 0.016192864 |
| 17494503 | Prkcdbp      | -0.626255448 | 0.016193403 |
| 17384951 | Zeb2         | -0.542809512 | 0.016197195 |
| 17413789 | Ncbp1        | 0.774445561  | 0.016211627 |
| 17233063 |              | 1.672107989  | 0.016211627 |
| 17340772 | LOC101056603 | -1.1779004   | 0.016220479 |
| 17202221 |              | 0.898429478  | 0.016220479 |
| 17483577 | Itgam        | -0.822948902 | 0.016222344 |
| 17203631 |              | 1.000148249  | 0.016223821 |
| 17508134 | Agpat6       | 0.647847153  | 0.016227216 |
| 17282435 | Numb         | 0.846590297  | 0.016227216 |
| 17502976 | Ddx39        | 0.544846161  | 0.016237917 |
| 17267954 | Epn3         | 0.798945325  | 0.016237917 |
| 17294934 | Thbs4        | -1.083986795 | 0.016238763 |
| 17407138 | Il6ra        | -0.823846016 | 0.016243579 |
| 17299589 | Ear5         | -0.602239801 | 0.016257093 |
| 17366768 |              | 1.676136988  | 0.016257093 |
| 17543781 | Nap1l2       | 0.739235896  | 0.016277875 |
| 17438322 |              | 0.586003422  | 0.016277875 |
| 17257054 |              | 0.54911723   | 0.016283903 |
| 17547879 | Derl1        | 0.535436084  | 0.016291441 |
| 17538186 |              | 1.014015027  | 0.016307788 |
| 17335474 | Gm16194      | -0.561462058 | 0.016307962 |
| 17220754 |              | 1.471334448  | 0.016325903 |
| 17202105 |              | 0.8974093    | 0.016356295 |
| 17502102 | Myo9b        | -0.601663113 | 0.016384556 |
| 17351708 | Cxxc1        | 0.601145669  | 0.016388265 |
| 17275776 |              | -0.699880023 | 0.016390272 |
| 17357904 | Olfr1454     | -2.452873861 | 0.016391841 |
| 17355538 | Haus1        | 0.65856581   | 0.016404611 |
| 17290770 | Mrpl32       | 0.567038232  | 0.016404611 |

|          |          |              |             |
|----------|----------|--------------|-------------|
| 17536230 |          | -0.499809592 | 0.016414488 |
| 17315398 |          | 0.956984604  | 0.016414488 |
| 17240800 | Gopc     | 0.528587817  | 0.016438091 |
| 17237835 | Ctdsp2   | -0.448646324 | 0.016472404 |
| 17540136 | Gm5634   | -0.930629553 | 0.016472404 |
| 17478277 | Zdhhc13  | 0.714400946  | 0.016472404 |
| 17299891 |          | -1.230880962 | 0.016485984 |
| 17364707 | Arhgap19 | 0.780051982  | 0.016490123 |
| 17298267 | Itih4    | -0.940912301 | 0.016494539 |
| 17548102 | Cycs     | 0.94007117   | 0.016494603 |
| 17548541 | Cycs     | 0.94007117   | 0.016494603 |
| 17303125 | Gm21103  | 0.552816112  | 0.016494603 |
| 17421856 | n-R5s193 | -0.751609091 | 0.016494603 |
| 17247067 | Ykt6     | 0.775440861  | 0.016494603 |
| 17279157 |          | 0.425940093  | 0.016494603 |
| 17206905 |          | 1.675821804  | 0.016494603 |
| 17359967 | Nfkb2    | -0.470668255 | 0.016495532 |
| 17428684 | Akr1a1   | -0.456293506 | 0.016504411 |
| 17203197 |          | 0.871552827  | 0.016504411 |
| 17357810 | Mpeg1    | -1.049016774 | 0.01650781  |
| 17519394 | Myo5a    | -0.852349572 | 0.01651487  |
| 17205455 |          | 0.982541883  | 0.01651487  |
| 17209063 |          | 1.742878932  | 0.01651487  |
| 17284373 | Ighm     | -1.046996399 | 0.016545021 |
| 17548211 | Gm13777  | -0.480834501 | 0.016549135 |
| 17508471 | Fnta     | 0.421587239  | 0.016571441 |
| 17513236 |          | -0.857618429 | 0.016571441 |
| 17231491 | Gm3213   | -0.658900045 | 0.016594011 |
| 17221754 | Gm6420   | -0.576484306 | 0.016594011 |
| 17314515 | Arid2    | 0.587794749  | 0.016594072 |
| 17233384 | Fabp7    | 1.652236248  | 0.01659459  |
| 17506439 | Gm10612  | -0.631384933 | 0.016597046 |
| 17381043 | Tpd52l2  | 0.472229482  | 0.016597046 |
| 17474846 | Vmn1r170 | -0.744156536 | 0.016601407 |
| 17208271 |          | -0.838934911 | 0.016619621 |
| 17459425 | Eif2ak3  | 0.692127018  | 0.016620875 |
| 17286320 | Foxq1    | 1.296274508  | 0.016624756 |
| 17206835 |          | 1.879298274  | 0.016624756 |
| 17204117 |          | -1.25682971  | 0.0166312   |
| 17419354 | Srsf4    | 0.641776695  | 0.016632962 |
| 17207951 |          | -0.786217758 | 0.016633049 |
| 17471840 | Magohb   | 0.799886837  | 0.016641277 |
| 17255482 | Gm11534  | 0.574725215  | 0.016652883 |

|          |               |              |             |
|----------|---------------|--------------|-------------|
| 17392025 | Trmt6         | 0.895607123  | 0.01665356  |
| 17450283 | Mapk10        | 1.248475623  | 0.016657887 |
| 17245044 | Tmem19        | 0.500224884  | 0.016657887 |
| 17533336 | Atp6ap2       | 0.557524164  | 0.01666565  |
| 17534669 | n-R5s6        | -0.506060718 | 0.01666565  |
| 17291469 | Prl7a1        | 0.572213502  | 0.01666565  |
| 17313350 | Zc3h7b        | -0.6801034   | 0.01666565  |
| 17312139 |               | -0.690176539 | 0.01666565  |
| 17422047 | Nol9          | 0.557559974  | 0.016667561 |
| 17297413 | Nudt13        | 0.753807784  | 0.016685779 |
| 17321094 | Col2a1        | -0.751016351 | 0.016687434 |
| 17353962 | Fgf1          | -0.563281684 | 0.016687434 |
| 17508167 |               | 1.257675287  | 0.016708959 |
| 17293250 | 4921517D22Rik | -0.737829485 | 0.016710751 |
| 17509235 | Trappc11      | 0.562185167  | 0.016710751 |
| 17283934 |               | 3.136719635  | 0.016710751 |
| 17483264 | Itgal         | -0.601771776 | 0.016712919 |
| 17422404 | Ttc34         | -0.633468912 | 0.016713362 |
| 17521523 | Traip         | 0.536924957  | 0.016716456 |
| 17249272 | 9230009I02Rik | -0.832185615 | 0.016725585 |
| 17423037 | Impad1        | 0.572148744  | 0.01672859  |
| 17403919 | Depdc1a       | 0.595653409  | 0.016732291 |
| 17204411 |               | 1.100548134  | 0.016734293 |
| 17304768 | Colq          | -0.52847381  | 0.016735056 |
| 17503260 | Dnase2a       | 0.428967099  | 0.016735056 |
| 17510605 |               | -0.79259466  | 0.016735056 |
| 17538427 |               | -0.72554641  | 0.016759321 |
| 17457308 |               | -1.363092112 | 0.016768684 |
| 17318118 | 9030619P08Rik | -0.507514274 | 0.016781355 |
| 17471231 | Prmt8         | 0.55579084   | 0.016781355 |
| 17221117 | 4732440D04Rik | -0.623086214 | 0.016785008 |
| 17316328 | Cct5          | 0.425465247  | 0.016785008 |
| 17465557 | Copg2         | 0.688192237  | 0.016785008 |
| 17244244 | Nedd1         | 1.032260475  | 0.016785008 |
| 17384182 | Zbtb43        | 0.723216028  | 0.016785008 |
| 17340745 | Gm17748       | -0.501357667 | 0.016785271 |
| 17362784 | Tmem132a      | -0.686711901 | 0.016785271 |
| 17492106 | Gm6567        | -0.664863905 | 0.016787889 |
| 17461494 |               | -0.446958828 | 0.016787889 |
| 17415134 |               | -0.521636544 | 0.016787889 |
| 17403879 | Ankrd13c      | 0.445919563  | 0.016794188 |
| 17212947 | Spats2l       | 0.705523728  | 0.016794188 |
| 17272163 | Trim47        | -0.5499689   | 0.016794469 |

|          |               |              |             |
|----------|---------------|--------------|-------------|
| 17262342 |               | 2.191419226  | 0.01679537  |
| 17551155 |               | -0.786182961 | 0.016838721 |
| 17332778 | 3300005D01Rik | -0.775892494 | 0.016842415 |
| 17417437 | Gpbp1l1       | 0.493762681  | 0.016842806 |
| 17479099 | Igf1r         | -0.777040664 | 0.016842806 |
| 17532442 | Zfp445        | 0.674426659  | 0.016842806 |
| 17511887 | Ciapi1        | 0.550978598  | 0.016847413 |
| 17329833 | Fbxo45        | 0.50827444   | 0.016847413 |
| 17544196 | Hdx           | 0.559805964  | 0.016869175 |
| 17288872 |               | 1.024976425  | 0.016877772 |
| 17222959 | 1700019A02Rik | -0.671149079 | 0.016911741 |
| 17271776 | Cd300lf       | -0.663507654 | 0.016916923 |
| 17548479 | Mrps17        | 0.771051728  | 0.016920296 |
| 17464934 | 2610001J05Rik | 0.531158601  | 0.016925852 |
| 17547696 | 2900097C17Rik | 0.650545997  | 0.016925852 |
| 17407886 | Rprd2         | 0.566475137  | 0.016929566 |
| 17206313 |               | 1.017946087  | 0.016938216 |
| 17261995 | Ublcp1        | 0.766020175  | 0.016946837 |
| 17404009 | Gm6194        | -0.730924234 | 0.016963045 |
| 17319847 | Ttll1         | 0.794306901  | 0.016963045 |
| 17239465 |               | 0.80412683   | 0.016978109 |
| 17526929 | 1110032A03Rik | 0.520846736  | 0.016978969 |
| 17468678 | Isy1          | 0.596725669  | 0.016978969 |
| 17550540 | ND3           | -0.761404155 | 0.016978969 |
| 17488848 | n-R5s153      | -0.539935638 | 0.016983409 |
| 17203381 |               | 1.183199306  | 0.016986272 |
| 17250249 | Nlrp3         | -0.671345872 | 0.016991252 |
| 17207183 |               | -0.884739058 | 0.016991252 |
| 17249863 | Gria1         | 0.843801558  | 0.017001236 |
| 17343026 | Ppil1         | 0.677796765  | 0.017011715 |
| 17461341 | Itpr1         | -1.07785836  | 0.017032746 |
| 17475218 |               | -1.008186396 | 0.017037264 |
| 17305064 | 9230112D13Rik | -0.650509532 | 0.017039838 |
| 17227464 | 5730559C18Rik | 0.454939835  | 0.01704332  |
| 17301697 | Tnfrsf10b     | 0.537483927  | 0.01704332  |
| 17506991 | Nrp1          | -0.913102618 | 0.017045898 |
| 17208605 |               | -0.823860841 | 0.017045898 |
| 17443921 | 6330403L08Rik | -0.590941838 | 0.01705323  |
| 17550312 | Scarna9       | 0.767316036  | 0.01705323  |
| 17441952 | Brap          | 0.578740091  | 0.017066243 |
| 17281412 | Klhl28        | 1.027305068  | 0.017066243 |
| 17410381 | Rpl34         | 0.51725922   | 0.017066243 |
| 17421895 | Slc2a7        | -0.577502269 | 0.017066243 |

|          |               |              |             |
|----------|---------------|--------------|-------------|
| 17369882 | St6galnac4    | -0.598635549 | 0.017066243 |
| 17448641 |               | -0.904781057 | 0.017066243 |
| 17394629 |               | -0.479280024 | 0.017066243 |
| 17249888 | Mfap3         | 0.677144898  | 0.017066286 |
| 17237079 | Gm15663       | -0.604721066 | 0.017085355 |
| 17373778 | Lincrd1       | -0.548858227 | 0.017085355 |
| 17520073 | Nt5e          | 0.912028688  | 0.017099    |
| 17515729 | Prdm10        | 0.642084352  | 0.017099    |
| 17547620 | Ftl1          | -1.081412466 | 0.017099747 |
| 17257197 | Mapt          | 0.582980956  | 0.017102076 |
| 17400562 | Hist2h2bb     | 0.467610496  | 0.017104651 |
| 17368947 | Odf2          | 0.456385586  | 0.017112042 |
| 17231033 | Atf3          | 0.541932816  | 0.017126373 |
| 17210619 |               | -0.747970903 | 0.017128363 |
| 17275832 | Fancm         | 0.452067968  | 0.017145671 |
| 17215647 | Prlh          | -0.71122211  | 0.017158981 |
| 17370594 |               | 0.609244295  | 0.017158981 |
| 17534122 | Ube2a         | 0.604741075  | 0.017164024 |
| 17546109 | Tlr7          | -0.979395534 | 0.017199046 |
| 17329937 | Umps          | 0.74029735   | 0.017199046 |
| 17526506 | 4833428L15Rik | -0.414215371 | 0.017204112 |
| 17206757 |               | 1.435457888  | 0.017204112 |
| 17288035 |               | 0.758865087  | 0.017204112 |
| 17203233 |               | 1.338158641  | 0.017204112 |
| 17324441 | Rtp1          | -0.493575993 | 0.017205899 |
| 17443185 | Mlxipl        | -0.584807257 | 0.017208315 |
| 17377793 | Tpx2          | 0.690420059  | 0.017208315 |
| 17249232 |               | -0.560265541 | 0.017208315 |
| 17207115 |               | -0.903804734 | 0.017211776 |
| 17238848 |               | -0.836933545 | 0.017219732 |
| 17407017 | Adam15        | -0.678872884 | 0.017226513 |
| 17544754 | Morf4l2       | 0.444724966  | 0.017239347 |
| 17362190 | Fkbp2         | -0.52114075  | 0.017240216 |
| 17367448 | Thns1         | 0.629945129  | 0.017259735 |
| 17244572 | Tmtc3         | 0.565145412  | 0.017276046 |
| 17251728 | Zbtb4         | -0.665958074 | 0.017279076 |
| 17205375 |               | -0.578157491 | 0.017298347 |
| 17261865 | Ccng1         | 0.386101454  | 0.017304883 |
| 17222719 | Col5a2        | -0.912913543 | 0.017304883 |
| 17236288 | Igf1          | -0.815141755 | 0.017313287 |
| 17233694 | Prf1          | -0.579066544 | 0.017313287 |
| 17267623 | Gm10367       | 0.677316731  | 0.017321464 |
| 17208645 |               | 1.388599291  | 0.017323905 |



|          |               |              |             |
|----------|---------------|--------------|-------------|
| 17536945 | 1700011M02Rik | -0.798909164 | 0.017327243 |
| 17373943 | Pax6          | 1.083657378  | 0.017327243 |
| 17378802 | 1700060C20Rik | -0.591565994 | 0.017335113 |
| 17351282 | Nedd4l        | 0.79882252   | 0.017335113 |
| 17534958 |               | -1.024773547 | 0.017339909 |
| 17217552 | Ube2t         | 0.899985549  | 0.017349706 |
| 17203225 |               | 1.092904087  | 0.017350234 |
| 17201145 |               | 1.343986004  | 0.017350303 |
| 17393805 | D630003M21Rik | -0.593557446 | 0.017350308 |
| 17477832 | Ftl1          | -1.02807816  | 0.017360168 |
| 17329720 | Gm15742       | -0.625405931 | 0.017360168 |
| 17286973 | Gmpr          | -1.293815707 | 0.017360168 |
| 17432835 | Plod1         | 0.643628348  | 0.017360168 |
| 17201187 |               | 0.842767572  | 0.017360168 |
| 17200365 |               | 1.365006033  | 0.017360168 |
| 17546620 |               | -0.516861789 | 0.017360168 |
| 17368674 | Gbgt1         | -0.539022404 | 0.017362435 |
| 17206813 |               | -0.596015243 | 0.017376118 |
| 17449522 |               | 0.86672494   | 0.017379911 |
| 17229128 | BC055324      | 0.905313102  | 0.017413188 |
| 17501061 | Enpp6         | -0.727498174 | 0.017413188 |
| 17415835 | Ror1          | 0.86577874   | 0.017419699 |
| 17330201 |               | -0.669288427 | 0.017433058 |
| 17387948 | Olfr1241      | -0.515996711 | 0.017437875 |
| 17211258 | Rdh10         | 0.456985115  | 0.017437875 |
| 17462052 | Gm20404       | -0.420795297 | 0.017446875 |
| 17374212 | Olfr1317      | -0.493623018 | 0.017454583 |
| 17358515 | Mir101b       | -0.536850272 | 0.017454895 |
| 17427117 | Gm16686       | -0.740858515 | 0.017462194 |
| 17206247 |               | 0.891874513  | 0.017490182 |
| 17234809 | Olfr1358      | -0.87721015  | 0.017503857 |
| 17432320 | Cela2a        | -0.759195956 | 0.017525479 |
| 17324733 | Cep19         | 0.662386107  | 0.017526258 |
| 17489801 | Nudt19        | 0.407279513  | 0.017531897 |
| 17355058 |               | -0.55518619  | 0.01755157  |
| 17405819 | B3galnt1      | 0.665862077  | 0.01756018  |
| 17509531 | 1700001D01Rik | -0.599177244 | 0.017560349 |
| 17455234 | Rnf6          | 0.477533255  | 0.017562571 |
| 17250744 | 2410006H16Rik | -0.788912623 | 0.017564545 |
| 17371436 | Bbs5          | 0.45587775   | 0.01756578  |
| 17373794 | Fbxo3         | 0.40940169   | 0.01756578  |
| 17494172 | Olfr605       | -0.699440998 | 0.01756578  |
| 17283770 | Glr5          | 0.880627061  | 0.017583471 |

|          |               |              |             |
|----------|---------------|--------------|-------------|
| 17388104 | Slc39a13      | -0.493600845 | 0.017583471 |
| 17467250 | Snca          | 0.685849248  | 0.017583471 |
| 17418271 | Fhl3          | -0.547271237 | 0.017588635 |
| 17454428 | Micall2       | -0.573796881 | 0.017609593 |
| 17527875 |               | -0.724270121 | 0.017609593 |
| 17517222 | Arhgap20      | 0.891254437  | 0.017610254 |
| 17525090 | Glb1l2        | 0.907769259  | 0.017610254 |
| 17281142 | Cfl2          | 0.458094094  | 0.017613333 |
| 17248589 | Gm12148       | -0.715945138 | 0.017613333 |
| 17307431 | Gm20017       | -0.711956109 | 0.017613333 |
| 17543336 | Las1l         | 0.568514279  | 0.017613333 |
| 17526674 | Rexo2         | -0.499310247 | 0.017613333 |
| 17451128 | Pus1          | 0.577677066  | 0.017640931 |
| 17205711 |               | -0.646148011 | 0.017640931 |
| 17317205 |               | 0.570917145  | 0.017658653 |
| 17298171 | Dcp1a         | 0.459630233  | 0.017689466 |
| 17476998 | Hmg1l1        | 0.582092947  | 0.017689466 |
| 17409792 | Palmd         | 0.535738435  | 0.017708318 |
| 17473985 | Gm4023        | -0.618303411 | 0.017741274 |
| 17290457 | Ryr2          | 0.893993962  | 0.017741274 |
| 17468231 | Vax2os        | -0.529549556 | 0.017741274 |
| 17282858 | Ism2          | -0.723129608 | 0.017743695 |
| 17519052 |               | -0.590417231 | 0.017744201 |
| 17319412 | Enthd1        | -0.441859531 | 0.017755127 |
| 17302376 | Pibf1         | 0.504198508  | 0.017762046 |
| 17491759 | Peg12         | -0.750200427 | 0.01777941  |
| 17345109 | Slc25a27      | 0.753563591  | 0.017819268 |
| 17209089 |               | -0.68434653  | 0.017819427 |
| 17348983 | 2700062C07Rik | 1.00369692   | 0.017842774 |
| 17535712 | Avpr2         | -0.386748663 | 0.017842774 |
| 17280426 | C630031E19Rik | -0.591863308 | 0.017842774 |
| 17548360 | Mul1          | -0.465363466 | 0.017846435 |
| 17413945 | Nr4a3         | 0.830143847  | 0.017865239 |
| 17502249 | Pgls          | -0.55839     | 0.017865239 |
| 17439013 | Epgn          | 1.093121982  | 0.017867552 |
| 17453288 | Ncf1          | -0.790284143 | 0.017882455 |
| 17351027 | Pdgfrb        | -0.893124209 | 0.017894075 |
| 17361299 | 2010003K11Rik | -0.48693832  | 0.017913754 |
| 17341132 | Phf10         | 0.422330792  | 0.017913754 |
| 17550014 |               | -0.77881542  | 0.017931602 |
| 17433743 | Ski           | -0.563060397 | 0.017935436 |
| 17305542 | 4930503E14Rik | -0.579551672 | 0.017941401 |
| 17538750 |               | 1.049681306  | 0.017941401 |

|          |               |              |             |
|----------|---------------|--------------|-------------|
| 17214881 |               | 0.488946713  | 0.017947947 |
| 17293242 |               | 0.690126204  | 0.017947947 |
| 17413591 | Polr1e        | 0.453834009  | 0.017951323 |
| 17253376 | Sez6          | 0.412333867  | 0.017951323 |
| 17383663 | Ier5l         | -0.579191231 | 0.017961903 |
| 17493167 | Tyr           | 0.642393595  | 0.017961903 |
| 17311706 | D15Ert621e    | 0.580629921  | 0.017984325 |
| 17515884 |               | 0.651469138  | 0.017994504 |
| 17413942 | Gm12434       | -0.801112996 | 0.018016671 |
| 17321351 | Prkag1        | 0.578053624  | 0.018016671 |
| 17208135 |               | -1.133369632 | 0.018016671 |
| 17266590 | Evi2a         | -0.592770132 | 0.018017703 |
| 17506694 | Gm19600       | -0.44464393  | 0.018023784 |
| 17526349 | Arcn1         | 0.485706504  | 0.018028268 |
| 17430894 | Smpd13b       | -0.660305752 | 0.01802941  |
| 17320068 |               | 0.71554865   | 0.018032277 |
| 17456152 | Cav2          | 0.442724532  | 0.018042531 |
| 17248071 |               | 1.470836492  | 0.018042531 |
| 17320811 |               | -0.735806005 | 0.018042531 |
| 17515035 | A230050P20Rik | -0.510785823 | 0.018052093 |
| 17347236 | Nlrc4         | -0.578697892 | 0.018052093 |
| 17330708 | Phldb2        | -0.485417001 | 0.018054445 |
| 17517424 | Ireb2         | 0.504363597  | 0.018067805 |
| 17501367 | Nek1          | 0.65075792   | 0.018067805 |
| 17538778 |               | -0.788072682 | 0.018067805 |
| 17248078 |               | 0.609215907  | 0.018067805 |
| 17406025 |               | -0.78527754  | 0.018072397 |
| 17393092 | 7530422B04Rik | -0.634983903 | 0.018072751 |
| 17323945 | Abcf3         | 0.461060297  | 0.018075964 |
| 17264867 | Senp3         | 0.577525465  | 0.018075964 |
| 17312427 | Mroh1         | -0.690864842 | 0.01807775  |
| 17266672 | Tefm          | 0.622278907  | 0.018080628 |
| 17217566 | Ptpn7         | -0.799290807 | 0.018087003 |
| 17252495 |               | -0.804999767 | 0.018104945 |
| 17206357 |               | -0.573241303 | 0.018104945 |
| 17516030 | Tmem218       | 0.934230831  | 0.018117748 |
| 17297639 | Vdac2         | 0.413528639  | 0.018117748 |
| 17280173 | 1700030C10Rik | 0.478071899  | 0.01812239  |
| 17355113 | Ccbe1         | -1.119604324 | 0.01812239  |
| 17361850 | Cdc42ep2      | -0.64503044  | 0.01812239  |
| 17319524 | Gm17597       | -0.500162109 | 0.01812239  |
| 17518134 | Gm5122        | -0.566488336 | 0.01812239  |
| 17312835 | Nol12         | 0.409635767  | 0.01812239  |

|          |               |              |             |
|----------|---------------|--------------|-------------|
| 17301272 | Prss51        | -0.607443675 | 0.01812239  |
| 17412166 | Sfrs18        | 0.667926464  | 0.01812239  |
| 17205639 |               | -1.064480821 | 0.01812239  |
| 17208011 |               | 1.028694187  | 0.01812239  |
| 17254660 | Vmp1          | 0.626179412  | 0.018131139 |
| 17200459 |               | 1.253072288  | 0.018148989 |
| 17224698 | Gm2102        | -0.498718974 | 0.018182302 |
| 17511263 | Best2         | -0.572855752 | 0.0181844   |
| 17257062 |               | 0.505854862  | 0.01818702  |
| 17248793 | Fam71b        | -0.499808653 | 0.018203905 |
| 17240720 |               | -0.576061818 | 0.018217316 |
| 17431955 | Arhgef10l     | -0.53689501  | 0.018220854 |
| 17205297 |               | 1.227121052  | 0.01822385  |
| 17341150 | Tcte3         | 0.539959847  | 0.018225427 |
| 17550602 | Rn45s         | -0.582580949 | 0.018237336 |
| 17285849 |               | -0.707552118 | 0.018237336 |
| 17538814 |               | -0.867673456 | 0.018237336 |
| 17510498 | Eps15l1       | 0.410122362  | 0.018248801 |
| 17528581 |               | -1.028772833 | 0.018251495 |
| 17292174 | Atxn1         | -0.570280677 | 0.018261482 |
| 17269516 | Klhl11        | 0.518492997  | 0.018261482 |
| 17479841 | A530021J07Rik | -0.672951812 | 0.018268661 |
| 17209083 |               | -0.965632593 | 0.018268661 |
| 17302156 | Gm19301       | -0.588020956 | 0.018272813 |
| 17404091 | Fabp4         | -1.662405052 | 0.018275227 |
| 17548563 | Gm10388       | -0.471530492 | 0.01828677  |
| 17413958 | Stx17         | 0.618129554  | 0.018296494 |
| 17431907 |               | 0.623964348  | 0.018315356 |
| 17358482 | Ppapdc2       | 0.548742104  | 0.018335923 |
| 17271133 | C330019F10Rik | -0.512276806 | 0.018337628 |
| 17289549 | n-R5s56       | -1.505414656 | 0.018337628 |
| 17281291 | E030019B13Rik | -0.593483469 | 0.018351178 |
| 17481157 | Olfr570       | -0.631973883 | 0.018351178 |
| 17374594 | Pak6          | 0.481125429  | 0.018351178 |
| 17300044 | Trav14n-2     | -0.459225081 | 0.018351178 |
| 17416763 |               | 1.395493497  | 0.018351178 |
| 17213503 | 9530026F06Rik | -0.457361294 | 0.018355789 |
| 17233886 | Atoh7         | -0.788686052 | 0.018372371 |
| 17536036 | Gm14750       | -0.868500628 | 0.018372371 |
| 17303018 | 2610042L04Rik | 0.92556293   | 0.018384694 |
| 17336838 | Vars          | -0.642999383 | 0.018384694 |
| 17355508 | Gm7276        | -0.520746552 | 0.018387684 |
| 17372862 | Olfr153       | -0.791953458 | 0.018396219 |

|          |               |              |             |
|----------|---------------|--------------|-------------|
| 17231733 | Adat2         | 0.468528621  | 0.018398624 |
| 17396652 | Cldn11        | 0.90176073   | 0.018439311 |
| 17550192 |               | -0.543276862 | 0.01845185  |
| 17353200 | Gm3227        | -0.802337907 | 0.018455086 |
| 17277550 |               | -0.412897642 | 0.018455086 |
| 17501250 | Hpgd          | 1.002447965  | 0.018469865 |
| 17394297 | Pltp          | -0.497384821 | 0.018493115 |
| 17283545 |               | 0.474786387  | 0.018493115 |
| 17208399 |               | 0.919973734  | 0.018510647 |
| 17388389 | Cry2          | 0.608130518  | 0.018519667 |
| 17475512 | Cyp2t4        | -0.581326913 | 0.018519667 |
| 17441037 | Oasl2         | 0.724082818  | 0.018519667 |
| 17278767 |               | 1.171607638  | 0.018519667 |
| 17209655 |               | -0.830112576 | 0.018519667 |
| 17366862 |               | 1.677392069  | 0.018519667 |
| 17532597 | mt-Tv         | 0.858969127  | 0.018540683 |
| 17278110 | Ubr7          | 0.663471924  | 0.018552599 |
| 17239142 | Samd5         | 0.968732958  | 0.018558949 |
| 17405838 | Gm6634        | -0.761072819 | 0.01857248  |
| 17313047 | Gm10856       | -0.534566361 | 0.018573962 |
| 17462351 | Il17ra        | -0.669522454 | 0.018576602 |
| 17387736 | Olf1107       | -0.596212052 | 0.018584921 |
| 17291833 | Eci2          | 0.744626566  | 0.018603197 |
| 17500496 | Gtf2e2        | 0.513526186  | 0.018603197 |
| 17542117 | Mir547        | -0.771448838 | 0.018603197 |
| 17486425 | Vmn2r52       | -0.555462668 | 0.018603197 |
| 17209671 |               | -0.960577426 | 0.018603197 |
| 17200239 |               | 1.681016363  | 0.018603261 |
| 17550332 | LOC101056194  | -1.02797086  | 0.018631504 |
| 17550360 | LOC101056194  | -1.02797086  | 0.018631504 |
| 17493331 | Pcf11         | 0.475034153  | 0.018631504 |
| 17246682 | Pes1          | 0.570945703  | 0.018631504 |
| 17539191 | A830080D01Rik | 0.577904302  | 0.018644623 |
| 17289137 | Homer1        | 0.428998116  | 0.01865541  |
| 17501408 | Sh3rf1        | -0.50650716  | 0.01865617  |
| 17532619 | mt-Tg         | 1.174512231  | 0.018665612 |
| 17411635 | Rab2a         | 0.402262212  | 0.018671445 |
| 17326003 |               | -0.703934299 | 0.01868351  |
| 17469404 |               | -0.569597153 | 0.01868351  |
| 17433461 | Hes3          | -0.637683887 | 0.01869722  |
| 17501292 | Hmgb2         | 0.452051898  | 0.018703205 |
| 17456304 |               | -1.011754593 | 0.018709397 |
| 17463387 | Tspan11       | 0.58322405   | 0.018713039 |

|          |               |              |             |
|----------|---------------|--------------|-------------|
| 17512809 | Hp            | -0.909189549 | 0.01871533  |
| 17448645 | Nfxl1         | 0.469397741  | 0.01871533  |
| 17406552 | Pear1         | -0.926400185 | 0.01871533  |
| 17504093 | Rspry1        | 0.732896766  | 0.018717157 |
| 17282868 | Sptlc2        | 0.557990225  | 0.018717157 |
| 17226263 | Tmem177       | 0.460609279  | 0.018717157 |
| 17364007 | Gm7237        | -0.624772104 | 0.018727319 |
| 17546246 | Spry3         | 1.141652135  | 0.018732849 |
| 17282222 | 2310015A10Rik | -0.455029597 | 0.018747296 |
| 17215605 | Cxcr7         | 0.729010662  | 0.018747296 |
| 17514326 | Gm10722       | -0.859127136 | 0.018749797 |
| 17245334 | Dyrk2         | 0.628212547  | 0.018753676 |
| 17530719 | 4930517N10Rik | -0.565652917 | 0.018782948 |
| 17225138 | Htr2b         | -0.574408317 | 0.018803592 |
| 17316737 | n-R5s39       | -0.474083674 | 0.018806013 |
| 17311152 | Odf1          | -0.474083674 | 0.018806013 |
| 17316371 |               | -0.634827632 | 0.018806013 |
| 17550040 |               | -0.634827632 | 0.018806013 |
| 17455903 | Asb4          | -0.990530434 | 0.018829962 |
| 17548979 |               | 0.891766428  | 0.018829962 |
| 17473660 | Zfp418        | 0.925037853  | 0.018839122 |
| 17415432 |               | -0.48815804  | 0.018851219 |
| 17336956 |               | 1.950046023  | 0.018860892 |
| 17266792 | Gm11423       | 0.463977002  | 0.018878966 |
| 17204919 |               | 1.754128266  | 0.018881542 |
| 17303757 | Dnajc9        | 0.611612988  | 0.01888523  |
| 17284894 | Asb13         | 0.876021526  | 0.018892131 |
| 17546355 | Rbmy          | -0.497215288 | 0.01889379  |
| 17526261 |               | -0.618253073 | 0.01889509  |
| 17515400 |               | 0.58676027   | 0.018903927 |
| 17536206 |               | -0.631114194 | 0.018906189 |
| 17300372 |               | 0.57577319   | 0.018906189 |
| 17517112 | Sdhd          | 0.591473367  | 0.018941529 |
| 17509127 | 1700029J07Rik | 0.601181863  | 0.018943694 |
| 17373739 | Elf5          | 0.702420328  | 0.018945399 |
| 17296639 | D830030K20Rik | 0.834776699  | 0.018949131 |
| 17432440 | Pdpm          | 0.487454646  | 0.018953061 |
| 17285687 | Hist1h4j      | -0.698719335 | 0.018971608 |
| 17217789 | Kif14         | 0.667570473  | 0.018971608 |
| 17365331 | Pitx3         | -0.584998443 | 0.018971608 |
| 17392722 |               | -1.015478763 | 0.018975932 |
| 17550156 |               | -1.015478763 | 0.018975932 |
| 17404896 | Cetn4         | -0.429483166 | 0.018979656 |

|          |               |              |             |
|----------|---------------|--------------|-------------|
| 17245481 | Rassf3        | 0.910741913  | 0.018991485 |
| 17416005 | Gm12800       | -0.76576726  | 0.018993562 |
| 17344405 | Ddr1          | -0.647716843 | 0.01899601  |
| 17336073 | Olfr239       | -0.476065454 | 0.019008925 |
| 17239471 |               | 0.959170433  | 0.019014752 |
| 17357270 | 1810009A15Rik | 0.463341803  | 0.019045682 |
| 17435221 | Rint1         | 0.733421738  | 0.019045682 |
| 17397923 | Aadac         | -0.630408262 | 0.019057421 |
| 17439532 | Gm11111       | -0.939001558 | 0.019057421 |
| 17366944 | Mir669h       | 0.887098324  | 0.019057421 |
| 17446775 | Preb          | 0.782120684  | 0.019057762 |
| 17201723 |               | 0.953964466  | 0.019062608 |
| 17201899 |               | 0.953964466  | 0.019062608 |
| 17280561 | Dus4l         | 0.852904521  | 0.019065385 |
| 17421384 | Gm13166       | 0.492826574  | 0.019068422 |
| 17461978 | Cand2         | -0.51674469  | 0.019072508 |
| 17322825 |               | -0.740581648 | 0.019077803 |
| 17529977 | E330023G01Rik | -0.498231463 | 0.01908089  |
| 17308626 | Lrch1         | 0.700198161  | 0.01908184  |
| 17529276 | Hmgn3         | 0.663663849  | 0.019097247 |
| 17541618 | Mbnl3         | 0.978016054  | 0.019112898 |
| 17348462 |               | 1.477533383  | 0.019112898 |
| 17219453 |               | 0.443458286  | 0.019120247 |
| 17245831 | Mbd6          | -0.549847206 | 0.019123085 |
| 17337816 | Cyp39a1       | 1.081526926  | 0.019123607 |
| 17341056 | Gm16052       | 0.525746928  | 0.019123607 |
| 17548021 | Gm7805        | -0.46270086  | 0.019123607 |
| 17207797 |               | 0.834434821  | 0.019135549 |
| 17538824 |               | -0.623174724 | 0.019138554 |
| 17375859 | Dusp2         | -0.532297508 | 0.019143886 |
| 17364642 | Pik3ap1       | -0.757957797 | 0.019143886 |
| 17398499 | Fga           | -1.35725787  | 0.019144679 |
| 17442796 | Fzd10         | 0.64581458   | 0.019152768 |
| 17395342 | Gm14326       | 0.808479099  | 0.019152768 |
| 17445713 | Mir5109       | -0.412940554 | 0.019194018 |
| 17319913 | Efcab6        | -0.478296788 | 0.019203301 |
| 17512891 | Gm21283       | -0.689225818 | 0.019206665 |
| 17270086 |               | -0.861607867 | 0.019212079 |
| 17215968 | Ppp1r7        | 0.690198246  | 0.019222001 |
| 17256854 | Gm11551       | -0.570413274 | 0.019230024 |
| 17456485 | Arf5          | -0.450323158 | 0.019231993 |
| 17302301 |               | -0.400818254 | 0.019231993 |
| 17427141 | Gm12606       | -0.624747755 | 0.019242421 |

|          |               |              |             |
|----------|---------------|--------------|-------------|
| 17473087 |               | 0.739854265  | 0.019244424 |
| 17524359 |               | -0.407311635 | 0.019244424 |
| 17540374 |               | -0.661497837 | 0.019244424 |
| 17210869 | Tcea1         | 0.486650495  | 0.019247048 |
| 17241643 | Ado           | 0.508505784  | 0.019256242 |
| 17439865 | D930016D06Rik | 0.571716787  | 0.019256242 |
| 17474657 | Nkpd1         | -0.74171667  | 0.019256242 |
| 17415177 | Rraga         | 0.413913408  | 0.019256242 |
| 17203805 |               | 1.180181482  | 0.019256242 |
| 17400519 |               | 0.71332194   | 0.019262889 |
| 17365778 | Zdhhc6        | 0.581276585  | 0.01926365  |
| 17432058 | Padi1         | -0.918540121 | 0.01927369  |
| 17525649 | Nrgn          | -0.485554117 | 0.019294752 |
| 17324471 | Mir28         | -0.597654344 | 0.01929558  |
| 17222440 | Rev1          | 0.606150964  | 0.01929558  |
| 17466878 | Hoxa10        | -0.581344129 | 0.019299338 |
| 17202277 |               | 0.519729363  | 0.019306449 |
| 17387708 | Olfr1090      | -0.612130878 | 0.019313641 |
| 17353488 | Cdc23         | 0.494900174  | 0.019331969 |
| 17484140 | Bccip         | 0.444771472  | 0.019343283 |
| 17350408 | Commd10       | 0.41441476   | 0.019343283 |
| 17397360 | D3ErtD751e    | 0.571149473  | 0.019343283 |
| 17516118 | Olfr877       | -0.698560909 | 0.019343283 |
| 17458734 | Plekha8       | 0.66150623   | 0.019343283 |
| 17369672 | Ppapdc3       | -0.43802548  | 0.019343283 |
| 17468889 | Vmn1r49       | -0.65221813  | 0.019343283 |
| 17204563 |               | 0.641282139  | 0.019343283 |
| 17466140 |               | -0.905775714 | 0.019343283 |
| 17201279 |               | -1.136538505 | 0.019343283 |
| 17205715 |               | 1.170516048  | 0.019343283 |
| 17205969 |               | 0.603699448  | 0.019343283 |
| 17290927 |               | 1.277970718  | 0.019349853 |
| 17387365 | Gm13686       | -0.516577196 | 0.019349951 |
| 17322488 | Cluap1        | 0.735757479  | 0.019355504 |
| 17548746 |               | -0.597896982 | 0.019362376 |
| 17512502 | Gfod2         | 0.515772541  | 0.019379972 |
| 17467499 |               | -0.526196028 | 0.019387386 |
| 17391437 |               | -2.216354519 | 0.019387386 |
| 17527982 | Glce          | 0.784193551  | 0.019416399 |
| 17449931 | Naa11         | -0.633474701 | 0.019416399 |
| 17378784 | Rprd1b        | 0.490829879  | 0.019416399 |
| 17474270 | Psg-ps1       | -0.648355184 | 0.019429836 |
| 17381078 | Gm16119       | 0.487764841  | 0.019430331 |



|          |               |              |             |
|----------|---------------|--------------|-------------|
| 17464850 | Thsd7a        | -0.64764756  | 0.019447034 |
| 17357535 |               | 0.63159594   | 0.019447034 |
| 17203869 |               | 0.872940458  | 0.019452899 |
| 17261107 | Rel           | 0.826840319  | 0.019455299 |
| 17216563 | Mki67ip       | 0.42350224   | 0.019467432 |
| 17374972 | Pla2g4b       | 0.897653391  | 0.019467432 |
| 17404402 | Ect2          | 0.560206547  | 0.019473781 |
| 17253972 | Psmc11        | 0.496466583  | 0.019474695 |
| 17403735 | Asb17         | -0.643251034 | 0.019492819 |
| 17303765 | Mrps16        | -0.569907075 | 0.019495612 |
| 17350824 | Slc12a2       | 0.983370422  | 0.019502502 |
| 17494020 | Art5          | -0.745604613 | 0.019509468 |
| 17514926 |               | -0.917736942 | 0.019509468 |
| 17530292 |               | 0.908240537  | 0.019527672 |
| 17292915 | Dok3          | -0.750353914 | 0.019531696 |
| 17225179 | Pde6d         | -0.449794353 | 0.019531696 |
| 17550669 |               | -0.885508439 | 0.019531696 |
| 17204665 |               | 1.449337308  | 0.019531696 |
| 17549930 | Copg2as2      | 0.876899157  | 0.019533944 |
| 17254093 | Lig3          | 0.612132871  | 0.019533944 |
| 17293370 | Tpbpa         | -0.992166698 | 0.019533944 |
| 17549040 |               | -0.826478606 | 0.019533944 |
| 17549046 |               | -0.826478606 | 0.019533944 |
| 17549052 |               | -0.826478606 | 0.019533944 |
| 17549058 |               | -0.826478606 | 0.019533944 |
| 17549064 |               | -0.826478606 | 0.019533944 |
| 17549074 |               | -0.826478606 | 0.019533944 |
| 17549142 |               | -0.826478606 | 0.019533944 |
| 17549146 |               | -0.826478606 | 0.019533944 |
| 17549154 |               | -0.826478606 | 0.019533944 |
| 17486449 | Zik1          | 0.784369662  | 0.019550589 |
| 17299638 | Ear7          | -0.701502505 | 0.019562912 |
| 17500108 | Fgfr1         | -0.850834833 | 0.019585647 |
| 17295685 | Marveld2      | 0.827114953  | 0.019585647 |
| 17550532 | COX2          | -0.52076621  | 0.01959271  |
| 17314230 |               | -0.564365617 | 0.01959271  |
| 17376063 | Zc3h6         | 0.633270294  | 0.019605416 |
| 17315394 |               | 0.608658571  | 0.019617963 |
| 17292671 | Msx2          | 0.972100906  | 0.019626993 |
| 17204413 |               | 0.967072664  | 0.019651933 |
| 17243486 | 1190007I07Rik | 0.820566373  | 0.019654131 |
| 17441063 | 2210016L21Rik | 0.534767414  | 0.019654131 |
| 17310816 | Cmb1          | 0.492539464  | 0.019654131 |

|          |               |              |             |
|----------|---------------|--------------|-------------|
| 17206997 |               | 1.114796863  | 0.019654131 |
| 17495271 | Copb1         | 0.430431579  | 0.019672645 |
| 17550667 |               | -0.864496832 | 0.019675996 |
| 17528744 |               | -0.556256554 | 0.019694956 |
| 17228099 | Gm15479       | -0.420721103 | 0.019705382 |
| 17550564 | mt-Tg         | 1.184406402  | 0.019705382 |
| 17220604 | 1700007P06Rik | -0.537854194 | 0.019723381 |
| 17299243 | Gm15218       | -0.565720993 | 0.019730327 |
| 17343652 | Kifc1         | 0.894694794  | 0.019730327 |
| 17204489 |               | 0.771135334  | 0.019730327 |
| 17283422 | Atxn3         | 0.596932051  | 0.019742904 |
| 17344126 | Hspa1b        | 1.055885783  | 0.019742904 |
| 17320842 |               | -0.692120968 | 0.019742904 |
| 17248196 | Asb3          | 0.597223241  | 0.019749451 |
| 17200767 |               | 0.951037804  | 0.019752675 |
| 17491259 | Uevld         | 0.585171506  | 0.019778802 |
| 17497320 | Clrn3         | -0.484775408 | 0.019801192 |
| 17493067 | Vmn2r69       | -0.540906637 | 0.019847894 |
| 17547575 | Gm20169       | -0.576520413 | 0.01988364  |
| 17464573 | Tfpi2         | -0.648894705 | 0.01988364  |
| 17386210 | Lrp2          | 1.155403591  | 0.019895322 |
| 17264824 | Mpdu1         | 0.554350431  | 0.019895322 |
| 17467451 |               | -0.415431772 | 0.019895322 |
| 17310432 | Mtmr12        | 0.785671824  | 0.019905121 |
| 17322731 |               | -0.995148874 | 0.019905121 |
| 17551159 |               | -0.904315852 | 0.019928655 |
| 17335790 | Gm15318       | -0.516395244 | 0.019948364 |
| 17352120 | Pard6g        | 0.597176952  | 0.019948364 |
| 17396733 | Actl6a        | 0.442215664  | 0.019951882 |
| 17220452 | Taf1a         | 1.233152936  | 0.019970628 |
| 17282008 | Zbtb25        | 0.623254704  | 0.019970628 |
| 17359931 |               | 1.59100142   | 0.019970628 |
| 17233738 |               | 0.615437653  | 0.019970628 |
| 17453675 | Gm15701       | -0.569368114 | 0.019970911 |
| 17550715 |               | -0.400375496 | 0.019975828 |
| 17200099 |               | 1.910295231  | 0.019985349 |
| 17408729 | Lrig2         | 0.61897572   | 0.019988586 |
| 17349572 | Paip2         | 0.520228912  | 0.019992183 |
| 17549108 |               | -0.751034992 | 0.019992183 |
| 17477401 | 2410002F23Rik | 0.596014938  | 0.0199966   |
| 17254330 |               | -0.641279698 | 0.0199966   |
| 17550677 |               | -0.935240284 | 0.020025958 |
| 17444372 | Cyth3         | 0.453167603  | 0.020026571 |

|          |               |              |             |
|----------|---------------|--------------|-------------|
| 17290121 | Paip1         | 0.44057276   | 0.020026571 |
| 17448411 | 1700126H18Rik | -0.544613512 | 0.020040154 |
| 17226701 | Gm15848       | -0.517710331 | 0.020041327 |
| 17281789 | Gpr135        | -0.447045206 | 0.020054346 |
| 17427284 | Mysm1         | 0.825168637  | 0.020061579 |
| 17517716 | Gm5121        | -0.75315417  | 0.020076161 |
| 17326472 | Mina          | 0.734822116  | 0.020076161 |
| 17316480 | Rnf19a        | 0.451744416  | 0.020076161 |
| 17432587 |               | -1.022740073 | 0.020076161 |
| 17202979 |               | 2.26513277   | 0.020076161 |
| 17202559 |               | 1.141531053  | 0.020076161 |
| 17341691 |               | -1.134288557 | 0.020076161 |
| 17319465 | St13          | 0.38669826   | 0.020084151 |
| 17520364 | Plod2         | 0.439854838  | 0.020097085 |
| 17324820 | Zdhhc19       | -0.4722935   | 0.020104612 |
| 17375203 | Adal          | 0.639689255  | 0.020107708 |
| 17267632 | Dgke          | 0.452166074  | 0.020107708 |
| 17525310 | Fli1          | -0.942454494 | 0.020107708 |
| 17484282 | Glrx3         | 0.525826255  | 0.020107708 |
| 17386161 | Spc25         | 0.616624786  | 0.020107708 |
| 17443801 |               | -0.672144007 | 0.020107708 |
| 17356179 |               | -0.691552175 | 0.020107708 |
| 17367536 | Apbb1ip       | -1.084444123 | 0.02012609  |
| 17274868 | Ccdc71l       | -0.493634816 | 0.02012609  |
| 17286900 | Gm20751       | -0.626242606 | 0.02012609  |
| 17503300 | Hook2         | 0.765656139  | 0.02012609  |
| 17300591 | Irf9          | 0.664313017  | 0.02012609  |
| 17244217 | Rmst          | 1.206995733  | 0.02012609  |
| 17210407 |               | -1.099348561 | 0.02012609  |
| 17380969 | Rtel1         | 0.771665993  | 0.020127576 |
| 17271733 | AF251705      | -0.997480624 | 0.020132931 |
| 17255531 | Gm11535       | -0.526723577 | 0.020136937 |
| 17549288 | LOC631360     | -0.705317086 | 0.020136937 |
| 17547755 | Nlrp4f        | -0.699731788 | 0.020136937 |
| 17520679 | Faim          | 0.604729039  | 0.020140698 |
| 17406363 | Fhdc1         | 1.289322262  | 0.020154735 |
| 17483891 | Plekha1       | 0.627964589  | 0.020165158 |
| 17492175 | A830073O21Rik | -0.58036451  | 0.020167074 |
| 17334803 | Jmjd8         | 0.704985545  | 0.020195658 |
| 17346062 | Zfp119a       | 1.092120255  | 0.020203458 |
| 17550380 |               | -0.715339112 | 0.020203458 |
| 17204385 |               | 1.668635204  | 0.020203458 |
| 17420834 | Gm13021       | -0.784226448 | 0.020204059 |

|          |               |              |             |
|----------|---------------|--------------|-------------|
| 17397129 | Fgf2          | -1.189180225 | 0.020206248 |
| 17288454 | Irx4          | 0.878159069  | 0.020214328 |
| 17355391 | Me2           | 0.840723728  | 0.020228697 |
| 17265818 | Olfr410       | -0.545675539 | 0.020241431 |
| 17472868 | Tm7sf3        | -0.523595644 | 0.020241431 |
| 17353169 | Gm9955        | -0.660480348 | 0.020242562 |
| 17295233 | Hmgcr         | 0.542966352  | 0.020246693 |
| 17261069 | 0610010F05Rik | 0.493782241  | 0.020249663 |
| 17467938 | Ctnna2        | 0.550074022  | 0.020249663 |
| 17534074 | Lonrf3        | -0.708171222 | 0.020254537 |
| 17214115 | 1700027A15Rik | -0.698648044 | 0.020261592 |
| 17487779 | Lypd4         | -0.586603447 | 0.02027598  |
| 17424802 | Olfr70        | -0.663892668 | 0.02027598  |
| 17459918 | Pcgf1         | 0.673018094  | 0.020281976 |
| 17467310 | 4930597O21Rik | -0.468638219 | 0.020297147 |
| 17355092 | Lman1         | 0.415144965  | 0.020297147 |
| 17494282 | Olfr644       | -0.766804712 | 0.020297147 |
| 17364365 |               | -1.287276899 | 0.020297147 |
| 17467415 |               | -0.905996557 | 0.020297147 |
| 17459258 |               | -0.523337203 | 0.020297147 |
| 17426765 | Nfib          | -1.054826927 | 0.020299765 |
| 17506989 |               | -0.512305339 | 0.020328124 |
| 17423386 | D930021N14    | -0.662843032 | 0.020336554 |
| 17520775 | Stag1         | 0.407752044  | 0.020343264 |
| 17409703 | Trmt13        | 0.373028215  | 0.020346988 |
| 17537572 |               | -0.511558106 | 0.020367873 |
| 17464901 | Tmem168       | 0.754223244  | 0.020371141 |
| 17409130 | Gstm3         | -1.017168324 | 0.020381377 |
| 17348453 |               | 0.425513323  | 0.020385753 |
| 17447900 | 4930435H24Rik | -0.430168866 | 0.020390454 |
| 17425603 | Gm12538       | -0.514920958 | 0.020390454 |
| 17465726 |               | -0.714330438 | 0.02040889  |
| 17341703 |               | 0.658332041  | 0.02040889  |
| 17204587 |               | 1.522961844  | 0.020421557 |
| 17316607 | Gm15940       | -0.510513237 | 0.020450056 |
| 17238433 | Cs            | 0.527329035  | 0.020457648 |
| 17286141 | Prl3c1        | -0.486011053 | 0.020461339 |
| 17547736 | Ssr1          | 1.128930345  | 0.020463821 |
| 17400622 | Lix1l         | -0.58760545  | 0.020470654 |
| 17442714 | Bri3bp        | 0.527978482  | 0.020475523 |
| 17548153 | Cat           | 1.11868556   | 0.020481456 |
| 17456545 | Lep           | -0.637118481 | 0.020481456 |
| 17434280 | LOC100043918  | -0.447668864 | 0.020481456 |

|          |               |              |             |
|----------|---------------|--------------|-------------|
| 17441540 | Med13l        | -0.564622834 | 0.020481456 |
| 17313575 | n-R5s41       | -0.878953809 | 0.020481456 |
| 17307215 | Zdhhc20       | 0.517888198  | 0.020481456 |
| 17358012 |               | 0.97062627   | 0.020481456 |
| 17442534 | Ddx55         | 0.560264999  | 0.020492026 |
| 17302418 | Uchl3         | 0.664439372  | 0.020492026 |
| 17270974 | Ddx5          | 0.481943818  | 0.020494813 |
| 17415702 | L1td1         | 0.748960974  | 0.020495056 |
| 17291211 | Hfe           | -0.734773831 | 0.020549692 |
| 17373585 | Alx4          | -0.577931662 | 0.020553908 |
| 17466532 | Pdia4         | 0.492889486  | 0.020553908 |
| 17340473 |               | -0.426776341 | 0.02055438  |
| 17401364 | St7l          | 0.604165414  | 0.020558724 |
| 17237351 |               | -0.685872701 | 0.020562054 |
| 17209929 |               | 1.807262552  | 0.020563873 |
| 17417749 | Med8          | 0.678471654  | 0.02058908  |
| 17294680 | Mir3961       | -0.723872324 | 0.02058908  |
| 17210855 | Lypla1        | 0.472827814  | 0.020602371 |
| 17408099 | Polr3c        | 0.637029794  | 0.020602371 |
| 17243523 |               | -0.966993426 | 0.020602371 |
| 17242496 | Rrp1          | 0.557063481  | 0.020603866 |
| 17341080 | Thbs2         | 1.025883857  | 0.020603866 |
| 17294694 |               | -0.849614744 | 0.020605299 |
| 17492838 | 3110040N11Rik | 0.526011343  | 0.020610233 |
| 17299834 | Trav14d-1     | -1.25890107  | 0.020610233 |
| 17521159 | Twf2          | 0.460315201  | 0.020610233 |
| 17398721 |               | -1.335581096 | 0.020610233 |
| 17425123 | Anks6         | -0.394791242 | 0.020617754 |
| 17350697 | Gramd3        | 0.420809271  | 0.020617754 |
| 17380102 | Fam210b       | 0.611500787  | 0.020621249 |
| 17389608 | Meis2         | 0.99324749   | 0.020621683 |
| 17203077 |               | 2.45552707   | 0.020621683 |
| 17506477 | 2810013P06Rik | 0.644621166  | 0.02063772  |
| 17545017 | Irs4          | -0.903602888 | 0.02063772  |
| 17278012 | Cpsf2         | 0.777002308  | 0.020640008 |
| 17379750 | 5031425F14Rik | -0.618788186 | 0.020675249 |
| 17468702 | H1fx          | -0.576980587 | 0.020680876 |
| 17201321 |               | -0.840958399 | 0.020680876 |
| 17419389 | Snhg12        | 0.484939653  | 0.020689499 |
| 17205209 |               | -0.874382238 | 0.020693951 |
| 17209399 |               | -0.874382238 | 0.020693951 |
| 17263007 |               | -0.544998705 | 0.020696156 |
| 17200359 |               | 1.480250763  | 0.020696156 |

|          |               |              |             |
|----------|---------------|--------------|-------------|
| 17501260 | Fbxo8         | 0.442120814  | 0.020706275 |
| 17517456 | Psma4         | 0.424869257  | 0.020706275 |
| 17391094 | Hdc           | 0.593689764  | 0.02072688  |
| 17526272 |               | 1.137773433  | 0.020731009 |
| 17314460 | Irak4         | 0.444682158  | 0.020738947 |
| 17497187 | Tex36         | -0.374650238 | 0.020738947 |
| 17477636 | Tsk           | -0.427671971 | 0.020738947 |
| 17531442 | Fbxw18        | -0.627896431 | 0.020749516 |
| 17355213 | Cep76         | 0.767781186  | 0.020751816 |
| 17551143 |               | -1.511183171 | 0.020753053 |
| 17544517 | Gla           | 0.661371375  | 0.020764068 |
| 17229110 |               | -0.603529382 | 0.020775587 |
| 17475193 | Cic           | -0.584637328 | 0.020776528 |
| 17439365 |               | 0.778884716  | 0.020776528 |
| 17547777 | Gm19281       | -0.603119082 | 0.020796231 |
| 17517947 | Hexa          | -0.43024816  | 0.020798144 |
| 17378395 | Myh7b         | 0.588621993  | 0.020830891 |
| 17549014 |               | -0.974056368 | 0.020830891 |
| 17549136 |               | -0.974056368 | 0.020830891 |
| 17549148 |               | -0.974056368 | 0.020830891 |
| 17408662 | Hipk1         | -0.487767011 | 0.020834979 |
| 17545496 | Gm5646        | -0.67624837  | 0.020843749 |
| 17545502 | Gm5646        | -0.67624837  | 0.020843749 |
| 17516098 | Siae          | 0.981584233  | 0.020843749 |
| 17326367 | Gm15839       | -0.726876981 | 0.020853837 |
| 17279608 | Ncapg2        | 0.887890889  | 0.020863195 |
| 17483058 | Nupr1         | -0.492639745 | 0.020868044 |
| 17507128 | Fcor          | -0.760707448 | 0.020872471 |
| 17326859 | Usp16         | 0.437883068  | 0.020883757 |
| 17523186 |               | 1.092378445  | 0.02088467  |
| 17435748 | Hadhb         | 0.701274849  | 0.020890265 |
| 17528175 | Dis3l         | 0.586250123  | 0.020893428 |
| 17205019 |               | 0.886935046  | 0.020903046 |
| 17354128 | Eif3j2        | 0.500846733  | 0.020908232 |
| 17498607 | Mcoln1        | 0.561033889  | 0.020908232 |
| 17425631 | Svep1         | -0.848736974 | 0.020908232 |
| 17376583 | 4921508D12Rik | -0.537331439 | 0.020910016 |
| 17350420 |               | -0.479550501 | 0.020910016 |
| 17409663 | Gpr88         | -0.504823536 | 0.020913999 |
| 17210779 |               | 0.872604154  | 0.020931319 |
| 17430906 | Themis2       | -1.048039063 | 0.020936163 |
| 17208239 |               | -0.814167221 | 0.020936163 |
| 17447696 |               | -0.631644667 | 0.020953002 |

|          |               |              |             |
|----------|---------------|--------------|-------------|
| 17339462 | 4930471L23Rik | -0.664188514 | 0.020955469 |
| 17528388 | BC050972      | -0.662227982 | 0.020973508 |
| 17385329 | Prpf40a       | 0.433137569  | 0.020977541 |
| 17407775 | Anxa9         | 0.561110332  | 0.020999032 |
| 17200461 |               | 1.501698308  | 0.021044087 |
| 17250205 | 2310033P09Rik | 0.392133185  | 0.021057719 |
| 17521141 | Mir135a-1     | -0.797733515 | 0.021071294 |
| 17207627 |               | -0.912431555 | 0.021071294 |
| 17295130 | F2r           | -0.501893819 | 0.021080257 |
| 17529169 | Cox7a2        | -0.507456905 | 0.021082795 |
| 17332628 | C2cd2         | 0.689365331  | 0.02109757  |
| 17550418 | Mirg          | 0.709637836  | 0.02109757  |
| 17434614 | Dmtf1         | 0.519910176  | 0.021099106 |
| 17443613 | Tfr2          | -0.555751255 | 0.021102295 |
| 17285225 | Gm2399        | 0.626694894  | 0.021140967 |
| 17238974 | Fbxo5         | 0.631541104  | 0.021145015 |
| 17238840 |               | -0.696264545 | 0.021152516 |
| 17382845 | C330006A16Rik | -0.547394031 | 0.021157641 |
| 17467513 |               | -0.525827604 | 0.021165269 |
| 17335129 | Hmga1         | -0.742693845 | 0.021166128 |
| 17389315 | Nutm1         | -0.54843056  | 0.021166728 |
| 17272337 | n-R5s74       | -0.807817922 | 0.02116751  |
| 17547935 | AA066038      | -0.567407717 | 0.021169482 |
| 17328610 | 2610318N02Rik | 0.918368746  | 0.02117462  |
| 17432976 | Angptl7       | -1.560407896 | 0.021198347 |
| 17548036 | Gm9258        | -0.731377504 | 0.021198347 |
| 17267039 | Lhx1          | -0.799816046 | 0.021198347 |
| 17537581 | Tnmd          | 0.495898303  | 0.021198347 |
| 17459894 |               | 0.864782051  | 0.021198347 |
| 17366828 |               | 0.85239137   | 0.021205371 |
| 17512229 | Dync1li2      | 0.578131895  | 0.021226047 |
| 17277749 |               | -0.682996018 | 0.021231684 |
| 17275955 | Atl1          | 0.485036244  | 0.021240595 |
| 17424768 | Gm12473       | -0.740773307 | 0.0212567   |
| 17275524 | Srp54c        | 0.970606103  | 0.021283863 |
| 17323082 | Ntan1         | 0.479376531  | 0.021289778 |
| 17302700 | 1700044C05Rik | -0.548965567 | 0.02130706  |
| 17397801 | 2810407C02Rik | 0.448316894  | 0.02130706  |
| 17432227 | Fblim1        | -0.685186841 | 0.02130706  |
| 17244191 | Tmpo          | 0.435848651  | 0.02130706  |
| 17207409 |               | -0.690116793 | 0.02130706  |
| 17427207 | Gm12649       | -0.500160832 | 0.021312111 |
| 17293803 | Nlrp4f        | -0.521664732 | 0.021319839 |

|          |               |              |             |
|----------|---------------|--------------|-------------|
| 17441671 | Slc24a6       | 0.594892676  | 0.021320069 |
| 17203263 |               | 1.020502379  | 0.021320069 |
| 17366904 |               | 1.087258315  | 0.021320069 |
| 17386328 | Mettl5        | 0.424482707  | 0.021321074 |
| 17440132 |               | 0.800154633  | 0.021321642 |
| 17548983 | Glul          | 1.044343098  | 0.021327025 |
| 17337719 | Mut           | 0.736950865  | 0.021332116 |
| 17340943 | Mrpl18        | 0.531331708  | 0.02135276  |
| 17288903 | Mblac2        | 1.102195558  | 0.021364442 |
| 17550671 |               | -0.873165387 | 0.021364442 |
| 17295861 | Srek1         | 0.552230248  | 0.021370984 |
| 17526968 | 4833427G06Rik | -0.607174835 | 0.021376387 |
| 17354219 | Trim36        | 0.873995273  | 0.021379078 |
| 17469887 | 2510049J12Rik | 0.985089098  | 0.021388565 |
| 17442709 | Gm10382       | -0.524579004 | 0.021389246 |
| 17512181 | Tk2           | 0.537779771  | 0.021389246 |
| 17201457 |               | -1.120131224 | 0.021389246 |
| 17518238 | Calml4        | -0.629837567 | 0.021401496 |
| 17442887 | Mmp17         | -0.501812718 | 0.021401496 |
| 17398853 | Sh2d2a        | -0.589882496 | 0.021401496 |
| 17437801 |               | -0.908159717 | 0.021401496 |
| 17549072 |               | -0.895938822 | 0.021401496 |
| 17388985 | Qser1         | -0.537967913 | 0.021422807 |
| 17461868 | Slc6a1        | 0.468922561  | 0.021426239 |
| 17420150 |               | -0.571990488 | 0.021426239 |
| 17400467 | Otud7b        | 0.776234608  | 0.021436894 |
| 17419658 | Gm13061       | -0.654586546 | 0.021439336 |
| 17359466 | Pgam1         | 0.583602883  | 0.021440426 |
| 17483033 | Tufm          | -0.638504912 | 0.021445933 |
| 17538801 |               | -0.799756462 | 0.021446775 |
| 17466505 | Rbpj          | -0.438089118 | 0.021449231 |
| 17201501 |               | -0.953249729 | 0.021449231 |
| 17548040 | Gm10554       | -0.683999739 | 0.021455211 |
| 17336957 |               | 1.054586854  | 0.021474189 |
| 17293249 |               | -1.188442571 | 0.021474495 |
| 17305005 | Npy4r         | -0.494289003 | 0.021475437 |
| 17371839 | Gm13662       | -0.430597138 | 0.021481438 |
| 17550657 |               | -0.697047296 | 0.021484944 |
| 17506418 | Cdt1          | 0.670476209  | 0.02150261  |
| 17548844 |               | 0.689107623  | 0.021510852 |
| 17431867 | Minos1        | 0.511473924  | 0.021512479 |
| 17391897 |               | -0.651593393 | 0.021521022 |
| 17351141 | 1500015A07Rik | 0.746013598  | 0.021524761 |



|          |                |              |             |
|----------|----------------|--------------|-------------|
| 17309351 | 1700128A07Rik  | -0.825575637 | 0.021524761 |
| 17391792 | Gfra4          | -0.551048001 | 0.021524761 |
| 17509687 |                | -0.863399001 | 0.021524761 |
| 17318967 |                | -0.948307186 | 0.021524761 |
| 17317214 | 9130401M01Rik  | 0.676796108  | 0.021528572 |
| 17355169 | Afg3l2         | 0.595704965  | 0.021532394 |
| 17350356 | Eif1a          | 0.450928749  | 0.021532394 |
| 17246416 | Olfr777        | -0.496580013 | 0.021532394 |
| 17230304 | Smyd3          | 0.552871215  | 0.021532394 |
| 17249856 |                | -0.588886758 | 0.021532394 |
| 17204681 |                | 0.566001397  | 0.021532394 |
| 17215008 | 4933407L21Rik  | -0.553278515 | 0.021567386 |
| 17292477 | Cenpp          | 0.628951068  | 0.021567386 |
| 17346043 | Pot1b          | 0.680806022  | 0.021567386 |
| 17370378 | Rabgap1        | 0.502527054  | 0.021567386 |
| 17416460 | Yipf1          | 0.584939515  | 0.021567386 |
| 17322827 |                | -0.886238359 | 0.021567386 |
| 17550052 |                | -0.886238359 | 0.021567386 |
| 17332315 |                | -1.023752494 | 0.021567386 |
| 17432891 | Gm13201        | -0.722227869 | 0.021570308 |
| 17377443 | Gm14139        | 0.682653187  | 0.021570308 |
| 17227729 | Cdc73          | 0.384986592  | 0.021574298 |
| 17284596 |                | -0.473244512 | 0.021574298 |
| 17341521 | Thoc6          | 0.725998154  | 0.021589529 |
| 17201335 |                | -1.093521263 | 0.021589529 |
| 17252058 | Tm4sf5         | -0.567953352 | 0.021590439 |
| 17507321 | Efnb2          | 0.643333609  | 0.021592536 |
| 17415544 | Fggy           | 0.505633436  | 0.021592536 |
| 17315002 | Mettl7a1       | 0.946090979  | 0.021604707 |
| 17494317 |                | -1.033790398 | 0.021607288 |
| 17465080 | Aass           | 0.518145248  | 0.021610158 |
| 17290353 | Gm10029        | -0.499982741 | 0.021610158 |
| 17272287 | Srp68          | 0.624766416  | 0.021610158 |
| 17466033 | Hipk2          | -0.691201347 | 0.021617294 |
| 17357230 |                | 0.661608188  | 0.02162336  |
| 17441083 | Sppl3          | 0.457376283  | 0.021629954 |
| 17446123 | Kcnh2          | -0.68095547  | 0.021641154 |
| 17241454 | Ddx50          | 0.405926124  | 0.02165661  |
| 17486254 | 2810047C21Rik1 | -0.518025526 | 0.021670471 |
| 17230566 |                | 0.979186601  | 0.021670471 |
| 17484353 | Lrrc27         | -0.635924516 | 0.021681128 |
| 17283933 |                | 0.9797877    | 0.021681128 |
| 17429632 | Mfsd2a         | 0.728387923  | 0.02168693  |

|          |               |              |             |
|----------|---------------|--------------|-------------|
| 17305592 | 4930431P03Rik | -0.420158383 | 0.021692432 |
| 17297227 | Slc4a7        | 0.719142366  | 0.021692432 |
| 17388551 | Alkbh3        | 0.409766075  | 0.021696549 |
| 17512299 | Cdh16         | -0.374191451 | 0.021696549 |
| 17451179 | E130006D01Rik | 0.689974798  | 0.021696549 |
| 17279980 | Vsnl1         | 1.191683032  | 0.021696549 |
| 17207701 |               | 0.802662654  | 0.021697619 |
| 17528053 | Map2k5        | 0.688498376  | 0.021700789 |
| 17543451 | Pja1          | 0.426085262  | 0.021769093 |
| 17201259 |               | -0.906196085 | 0.021769093 |
| 17355009 | Nars          | 0.667495512  | 0.021775397 |
| 17523224 | Eif1b         | 0.428889336  | 0.02178388  |
| 17219677 | Olfr433       | -0.645085584 | 0.02178388  |
| 17390318 | Ubr1          | 0.504834562  | 0.02178388  |
| 17278781 |               | 0.803691673  | 0.021797071 |
| 17371939 |               | -0.614574479 | 0.021799904 |
| 17214622 | Slc4a3        | -0.520136854 | 0.021805985 |
| 17454919 | Ccz1          | 0.615779565  | 0.021820227 |
| 17406867 | Dap3          | 0.537245534  | 0.021820227 |
| 17223655 | Gm12747       | -0.588259863 | 0.021820227 |
| 17422257 | Gm833         | -0.473598398 | 0.021820227 |
| 17470625 |               | -0.923120093 | 0.021820227 |
| 17440108 | A430072P03Rik | -0.614079287 | 0.021835167 |
| 17511366 | Dnaja2        | 0.38857843   | 0.021835167 |
| 17205689 |               | -1.066367164 | 0.021835167 |
| 17437355 | Pacrgl        | 0.662326362  | 0.021849318 |
| 17377744 | Rem1          | -0.682949337 | 0.021872208 |
| 17344850 | Olfr95        | -0.651293115 | 0.021877954 |
| 17345782 | Nfya          | 0.517200284  | 0.021910044 |
| 17399285 | Clk2          | 0.447916015  | 0.021916697 |
| 17482737 |               | 0.805696746  | 0.021929351 |
| 17480102 | Sytl2         | -0.828538463 | 0.021937292 |
| 17413054 | Ccl27a        | 0.976810302  | 0.021943748 |
| 17413151 | Ccl27a        | 0.976810302  | 0.021943748 |
| 17434221 | Ccl27a        | 0.976810302  | 0.021943748 |
| 17522451 | Prss42        | -0.639149718 | 0.021943748 |
| 17394185 | Trp53tg5      | -0.551777482 | 0.021943748 |
| 17495368 | Nup35         | 0.642591469  | 0.021945787 |
| 17312341 | Grina         | -0.456377204 | 0.021953897 |
| 17294324 | Cep72         | 0.736108784  | 0.021967068 |
| 17308046 | Nefm          | 0.786714696  | 0.021967068 |
| 17210337 |               | -0.874384006 | 0.021979438 |
| 17252523 | P2rx1         | -0.513613875 | 0.021980237 |

|          |               |              |             |
|----------|---------------|--------------|-------------|
| 17546953 | Rbmy          | -0.537319095 | 0.021982937 |
| 17283030 | Ston2         | 0.564193852  | 0.021982937 |
| 17433405 | Phf13         | 0.54647092   | 0.021999571 |
| 17287381 | Syk           | -0.571275437 | 0.022024951 |
| 17549230 |               | -0.488909009 | 0.022024951 |
| 17412692 | Ifnk          | 1.046207411  | 0.02202622  |
| 17297885 |               | -0.804774348 | 0.02202622  |
| 17340404 | Adcyap1       | 0.691284999  | 0.022038607 |
| 17216246 | Cntnap5b      | -0.524715646 | 0.022053135 |
| 17505252 | Cyb5b         | 0.71521274   | 0.022053135 |
| 17293968 | Zfp459        | 0.551680888  | 0.022053135 |
| 17303670 | D830030K20Rik | 0.587326021  | 0.022055122 |
| 17536624 | Dlg3          | 0.451552282  | 0.022055122 |
| 17549578 | Twf2          | -0.792697312 | 0.022055122 |
| 17229502 | Uap1          | 0.686359849  | 0.022066793 |
| 17376834 | Slx4ip        | 0.870480277  | 0.022076301 |
| 17544954 | Tex13         | 0.692600195  | 0.022083669 |
| 17438602 | Ythdc1        | 0.448357803  | 0.022085163 |
| 17550665 |               | -0.842690715 | 0.022089018 |
| 17440134 |               | 0.674983187  | 0.022115774 |
| 17366980 | Gm13293       | -1.045606543 | 0.022117979 |
| 17327428 | Dyrk1a        | 0.44953943   | 0.022124586 |
| 17339991 | Eml4          | 0.556566436  | 0.022124586 |
| 17309907 | Prkaa1        | 0.583760005  | 0.022124586 |
| 17490624 | Rpl13a        | 0.57051195   | 0.022124586 |
| 17238580 | Sarnp         | 0.455109711  | 0.022124586 |
| 17210259 |               | 1.447747894  | 0.022124586 |
| 17210281 |               | 1.447747894  | 0.022124586 |
| 17535930 | Dkc1          | 0.677033466  | 0.022125289 |
| 17414114 | Smc2          | 0.485223665  | 0.022126088 |
| 17220148 | Lin9          | 0.69937377   | 0.022128541 |
| 17437107 | Drd5          | -0.530032174 | 0.022144727 |
| 17342793 | Taf11         | 0.668376286  | 0.022144727 |
| 17496589 | Qprt          | -0.581943671 | 0.022145742 |
| 17205495 |               | -0.717546003 | 0.022154394 |
| 17539391 |               | -0.452756791 | 0.022155626 |
| 17291057 | Hist1h2ag     | -0.919565233 | 0.02215996  |
| 17237208 | Csrp2         | 0.54622242   | 0.022167059 |
| 17225969 | B230216N24Rik | -0.472672252 | 0.022170788 |
| 17250812 | Tvp23b        | 0.630285122  | 0.022170788 |
| 17226847 | Cdk18         | -0.574662659 | 0.022172586 |
| 17550675 |               | -0.910261225 | 0.022187237 |
| 17440130 | Rpl5          | 0.57496066   | 0.022187646 |

|          |               |              |             |
|----------|---------------|--------------|-------------|
| 17258623 | 1810032O08Rik | 0.535610021  | 0.022189991 |
| 17311789 | Rnf139        | 0.524601258  | 0.022211245 |
| 17201477 |               | -0.774672092 | 0.022211245 |
| 17490532 | Scaf1         | -0.457897488 | 0.022217514 |
| 17242910 | Mbd3          | -0.42647547  | 0.022235276 |
| 17357044 | 2700081O15Rik | -0.426589696 | 0.022242976 |
| 17460649 | Ruvbl1        | 0.46947196   | 0.022242976 |
| 17500941 | Ufsp2         | 0.551926572  | 0.022263495 |
| 17448810 |               | 1.13379544   | 0.022277845 |
| 17303140 | Gm21103       | 0.712936111  | 0.022295323 |
| 17350639 | Prdm6         | -0.896849332 | 0.022304829 |
| 17209151 |               | 1.618941303  | 0.022304829 |
| 17355842 |               | -0.454569649 | 0.02230998  |
| 17387385 | Calcr1        | 0.67332505   | 0.022315234 |
| 17357815 | Fam111a       | -0.564184454 | 0.022322318 |
| 17286575 | Fars2         | 0.373083317  | 0.022325207 |
| 17451721 | Gatc          | 0.635802066  | 0.022328085 |
| 17374984 | Pla2g4b       | 0.585671756  | 0.022328399 |
| 17204387 |               | 1.117263143  | 0.022355241 |
| 17514830 | Taf1d         | 0.903518939  | 0.022372573 |
| 17411697 | Clvs1         | 0.85875834   | 0.022386476 |
| 17446499 | Gm10471       | -0.446461179 | 0.022386476 |
| 17413573 | Grhpr         | 0.676032209  | 0.022386476 |
| 17388632 | Api5          | 0.418597119  | 0.02239229  |
| 17205127 |               | 0.886017275  | 0.02239229  |
| 17209317 |               | 0.886017275  | 0.02239229  |
| 17302656 | Gpc6          | 0.892045337  | 0.022392633 |
| 17276348 | Hif1a         | -0.448393802 | 0.022398142 |
| 17404682 | Dnajc19       | 0.484227932  | 0.022399441 |
| 17224813 | Dock10        | -0.686747632 | 0.022399441 |
| 17447940 | Lcorl         | 0.584603354  | 0.022399441 |
| 17453128 |               | 0.550166781  | 0.022428213 |
| 17319009 | Il2rb         | -0.540624623 | 0.02245308  |
| 17204127 |               | 1.646881861  | 0.022453435 |
| 17289824 | Mier3         | 0.732776695  | 0.022459936 |
| 17481673 | Rpl27a        | 0.562896925  | 0.022459936 |
| 17376026 | Tmem87b       | 0.441948647  | 0.022459936 |
| 17391485 |               | 1.311291384  | 0.022459936 |
| 17318587 | Slc39a4       | 1.093135551  | 0.022466606 |
| 17457379 |               | -0.52202302  | 0.022466994 |
| 17340401 | Gm15404       | -0.565765738 | 0.022484768 |
| 17309455 | n-R5s51       | -0.819025744 | 0.022484768 |
| 17238558 | Mmp19         | -0.933902396 | 0.022500882 |

|          |               |              |             |
|----------|---------------|--------------|-------------|
| 17233076 | Gm4795        | -0.564983614 | 0.022503334 |
| 17357908 | Olf1462       | -0.62364958  | 0.022549193 |
| 17430397 | Hdac1         | 0.421973211  | 0.02256819  |
| 17510624 |               | -0.795321135 | 0.022570245 |
| 17399314 | Fam189b       | -0.637666928 | 0.022601694 |
| 17332766 | Zdhc14        | -0.441516328 | 0.022601694 |
| 17271001 | Gm11706       | -0.831596044 | 0.022616442 |
| 17317994 | Lypd2         | 0.583501492  | 0.022616442 |
| 17210787 |               | 0.525970083  | 0.022638196 |
| 17422269 | A430005L14Rik | 0.527272731  | 0.022649414 |
| 17534696 | A630012P03Rik | -0.452852151 | 0.022649414 |
| 17285731 | Gm11290       | -0.733475706 | 0.022649414 |
| 17492289 | Det1          | 0.515344854  | 0.022651308 |
| 17498158 | Mir483        | -0.896020102 | 0.022651308 |
| 17550282 | Mir483        | -0.896020102 | 0.022651308 |
| 17202923 |               | 1.689254437  | 0.022651308 |
| 17202147 |               | 1.078402182  | 0.022651308 |
| 17324689 |               | -0.793652205 | 0.022654877 |
| 17307428 | Gm15919       | -0.566467689 | 0.022664315 |
| 17410615 |               | -0.766910649 | 0.022664315 |
| 17447092 |               | 0.640783115  | 0.022664315 |
| 17510166 | Mast3         | -0.472826758 | 0.022668384 |
| 17449532 |               | -0.41257041  | 0.02267416  |
| 17411420 | Cth           | 0.842512986  | 0.022676407 |
| 17217329 | Kiss1         | -0.714751481 | 0.022694521 |
| 17449920 | Paqr3         | 0.57827895   | 0.022700733 |
| 17333805 | Vmn2r100      | -0.54218993  | 0.022738453 |
| 17338532 | Gm6934        | -0.776241993 | 0.022754167 |
| 17299678 | Arhgef40      | -0.646614358 | 0.022799552 |
| 17434310 | Fam133b       | 0.771840354  | 0.022799552 |
| 17500639 | Gm6213        | -0.371396806 | 0.022800103 |
| 17550673 |               | -0.866941043 | 0.022809795 |
| 17356002 | Unc93b1       | -0.838047926 | 0.022827966 |
| 17238367 | Stat2         | 0.757233785  | 0.022836697 |
| 17494725 | Olf2          | -0.645731229 | 0.022843873 |
| 17298510 | Ncoa4         | 0.492788254  | 0.022866107 |
| 17529076 | Slc17a5       | 0.564438648  | 0.022866107 |
| 17224270 | Tmbim1        | 0.451145049  | 0.022866107 |
| 17324161 |               | -0.950959694 | 0.022866107 |
| 17448803 |               | 1.500576322  | 0.022866107 |
| 17530906 | Gm17118       | -0.558686529 | 0.022866402 |
| 17455494 |               | -0.949738513 | 0.022866402 |
| 17464692 | Shfm1         | 0.461605574  | 0.022882904 |

|          |               |              |             |
|----------|---------------|--------------|-------------|
| 17395640 | B230312C02Rik | -0.470392491 | 0.022886706 |
| 17316545 | Ywhaz         | 0.445382433  | 0.022888989 |
| 17544069 |               | -0.971497175 | 0.022893122 |
| 17526917 | 2310030G06Rik | 0.597609822  | 0.022913432 |
| 17460958 | Ccdc174       | 0.466923214  | 0.02291807  |
| 17533199 | Lancl3        | -0.483101816 | 0.022961264 |
| 17380017 | 1700101G07Rik | -0.431662183 | 0.022961691 |
| 17325373 | Ildr1         | 0.542832103  | 0.022961691 |
| 17270848 | Scn4a         | -0.533166486 | 0.022961691 |
| 17475358 |               | -0.606045957 | 0.022961691 |
| 17279365 | Siva1         | 0.56979124   | 0.022970583 |
| 17358008 |               | 0.903464407  | 0.023007953 |
| 17350088 | Mir5097       | -0.488126699 | 0.023013547 |
| 17481723 | Ipo7          | 0.521916499  | 0.023027877 |
| 17380782 | Ntsr1         | -0.454866519 | 0.023027877 |
| 17244697 |               | -0.675791617 | 0.023027877 |
| 17448565 | Gabrg1        | 1.043757076  | 0.023053754 |
| 17357234 |               | 1.909006711  | 0.02305632  |
| 17484295 | Ppp2r2d       | 0.577427638  | 0.023058577 |
| 17418985 | Gm8539        | 0.674221038  | 0.023076946 |
| 17435107 | Lrrc17        | 0.785281384  | 0.023076946 |
| 17454877 | Usp42         | 0.576326973  | 0.023076946 |
| 17201411 |               | -0.836409322 | 0.023076946 |
| 17309380 | 4930505G20Rik | -0.516961469 | 0.023092892 |
| 17350673 | 9430076G02Rik | -0.570475012 | 0.023105208 |
| 17510345 | Bst2          | 1.089828331  | 0.023105208 |
| 17310977 | Kcns2         | -0.545214601 | 0.023105208 |
| 17347210 | Memo1         | 0.493174132  | 0.023105208 |
| 17468143 | Mthfd2        | 1.035636468  | 0.023105208 |
| 17232509 |               | -0.548362781 | 0.023105208 |
| 17550663 |               | -0.792705231 | 0.02310686  |
| 17480466 | Gucy2d        | -0.501631002 | 0.023109116 |
| 17307318 | Setdb2        | 0.431162283  | 0.023109116 |
| 17357306 | B3gat3        | 0.497698928  | 0.023112    |
| 17351591 | A730085E03Rik | -0.597752869 | 0.023117753 |
| 17367102 | Mrc1          | -1.268994438 | 0.023120757 |
| 17342238 | Tpsab1        | -0.683898449 | 0.023148941 |
| 17513769 |               | -0.82030851  | 0.023162954 |
| 17200303 |               | -0.864026116 | 0.023167389 |
| 17488032 | Axl           | -0.75756973  | 0.023171177 |
| 17201267 |               | -0.929913879 | 0.023184155 |
| 17550661 |               | -0.752695611 | 0.023195154 |
| 17220016 |               | -0.899920555 | 0.023209845 |

|          |               |              |             |
|----------|---------------|--------------|-------------|
| 17450207 | Wdfy3         | -0.642365462 | 0.023214045 |
| 17284314 | Igh-VJ558     | -0.495717998 | 0.023224326 |
| 17497811 | Mir210        | -0.55574349  | 0.02322756  |
| 17226043 | Bcl2          | -0.67105894  | 0.023228794 |
| 17289486 | Taf9          | 0.50934788   | 0.023258026 |
| 17203963 |               | 0.848621167  | 0.023258318 |
| 17479540 | Ngrn          | 0.667555376  | 0.023260041 |
| 17431099 |               | -0.554971378 | 0.02326661  |
| 17387244 |               | -0.586581078 | 0.023273879 |
| 17257819 | 1700096J18Rik | -0.424634711 | 0.023279166 |
| 17291397 | Gm11351       | -0.559857836 | 0.023285879 |
| 17488312 | Map3k10       | -0.595466403 | 0.023285879 |
| 17355304 | 4930503L19Rik | 0.659211647  | 0.023290554 |
| 17378359 | Acss2         | 0.570653518  | 0.023290554 |
| 17523861 | C330006D17Rik | 0.968855605  | 0.023290554 |
| 17247448 | Ppp3r1        | 0.478278466  | 0.023290554 |
| 17230651 | Brox          | 0.560542193  | 0.023291969 |
| 17358274 | Dock8         | -1.00116514  | 0.023310906 |
| 17288278 | Ptdss1        | 0.503440725  | 0.023310906 |
| 17201091 |               | 1.428512688  | 0.023345712 |
| 17489886 | Ccne1         | 0.497636213  | 0.023354228 |
| 17340041 |               | -1.192010516 | 0.023380426 |
| 17281635 | Mir681        | -0.681217586 | 0.023397867 |
| 17412602 | Rngtt         | 0.396916852  | 0.023397867 |
| 17385058 | 1700057H21Rik | -0.677028604 | 0.023460841 |
| 17439842 | Pkd2          | -0.491863435 | 0.023460841 |
| 17541802 | Zfp36l3       | -0.633341761 | 0.023460841 |
| 17367139 | Slc39a12      | 0.681727419  | 0.023466907 |
| 17301378 | Zfp395        | -0.49765585  | 0.023467747 |
| 17380544 | Gm14401       | 0.700909965  | 0.023471819 |
| 17467931 |               | -0.691737778 | 0.023472577 |
| 17475777 | Fbl           | 0.826957948  | 0.023472853 |
| 17295373 | 2310005E17Rik | -0.630920187 | 0.023501974 |
| 17488719 | Fam98c        | -0.503555464 | 0.023501974 |
| 17262352 |               | 0.451504239  | 0.023503356 |
| 17234691 | Sumo3         | 0.710705518  | 0.023514627 |
| 17281853 | 4930447C04Rik | 0.711439863  | 0.023551399 |
| 17391212 | Ncaph         | 0.619312424  | 0.023558629 |
| 17205349 |               | 1.281934779  | 0.023561627 |
| 17476856 | E130304I02Rik | -0.495815422 | 0.023574478 |
| 17503214 | G430095P16Rik | -0.444544043 | 0.02358245  |
| 17203789 |               | 0.776757893  | 0.023598562 |
| 17466641 | Igf2bp3       | 0.509169033  | 0.023600274 |

|          |               |              |             |
|----------|---------------|--------------|-------------|
| 17462036 | Rho           | -0.582813119 | 0.023600274 |
| 17422629 | Cdk11b        | 0.504653047  | 0.023602763 |
| 17550855 |               | -0.616214565 | 0.023611787 |
| 17376096 | Polr1b        | 0.44706354   | 0.023618503 |
| 17202917 |               | 1.253460241  | 0.02361916  |
| 17210475 |               | 1.713855771  | 0.023628803 |
| 17547559 | Dusp6         | -0.813757385 | 0.023630429 |
| 17376051 | Fbln7         | -0.530457733 | 0.023630429 |
| 17206629 |               | -1.192405607 | 0.023630429 |
| 17208397 |               | 1.146948462  | 0.023631407 |
| 17275929 | Atp5s         | 0.591478217  | 0.023650864 |
| 17401169 | Bcas2         | 0.379806444  | 0.023650864 |
| 17292598 | Diras2        | 0.885423002  | 0.023650864 |
| 17420024 | E2f2          | -0.648310918 | 0.023650864 |
| 17394908 | Gm11011       | -0.721785652 | 0.023650864 |
| 17526382 | Kmt2a         | -0.589799832 | 0.023650864 |
| 17374218 | Lpcat4        | 0.701963783  | 0.023650864 |
| 17538753 |               | -1.01786899  | 0.023650864 |
| 17489098 | Rps12         | -0.98972248  | 0.023660415 |
| 17386591 | Atf2          | 0.514814901  | 0.023671465 |
| 17376917 | Ndufaf5       | 0.623844325  | 0.023673317 |
| 17209489 |               | -0.943092736 | 0.023681227 |
| 17462158 | 6820426E19Rik | -0.474019512 | 0.023688944 |
| 17540059 | Porcn         | 0.732869743  | 0.023707733 |
| 17500248 | Rnf170        | 0.561913334  | 0.023707733 |
| 17544162 |               | -0.809511451 | 0.023707733 |
| 17507368 | 3930402G23Rik | -0.47845659  | 0.023733898 |
| 17397377 | Pcdh10        | 0.766419327  | 0.023739887 |
| 17449642 |               | 1.026899039  | 0.023743013 |
| 17222694 | Kdelc1        | 0.454725713  | 0.023746836 |
| 17550609 |               | -0.58254098  | 0.023757829 |
| 17315718 | Ptger4        | 0.427565964  | 0.023759111 |
| 17216721 |               | -0.809183598 | 0.023779231 |
| 17509462 | Galnt7        | 0.504441288  | 0.023780662 |
| 17273806 | 0610009D07Rik | 0.437490861  | 0.023783741 |
| 17421172 |               | -0.552645325 | 0.023783741 |
| 17273292 | Dcxr          | -0.592490667 | 0.023800473 |
| 17254332 | Hnf1b         | 0.987036254  | 0.023804461 |
| 17522377 | Kif9          | 0.404733904  | 0.023824544 |
| 17435769 | Mir1960       | -1.088106592 | 0.023836859 |
| 17319823 | 1700001L05Rik | 0.735697886  | 0.023841986 |
| 17354681 | Slc6a7        | -0.475614434 | 0.023841986 |
| 17545150 | Lhfpl1        | 0.442778887  | 0.023844533 |



|          |               |              |             |
|----------|---------------|--------------|-------------|
| 17487062 | Psg25         | -0.709429142 | 0.023844533 |
| 17270937 | Pecam1        | -0.599688933 | 0.023849125 |
| 17259235 | Baiap2        | 0.449251222  | 0.023858105 |
| 17366924 | Mir669m-2     | 0.879866287  | 0.023864864 |
| 17372030 | 4930445N08Rik | -0.594871989 | 0.023871469 |
| 17345586 | Rpl7l1        | 0.454112513  | 0.023871469 |
| 17371221 | Scn2a1        | 1.068799884  | 0.02387892  |
| 17407361 |               | -0.779651811 | 0.02387892  |
| 17440826 | Acacb         | -0.426478769 | 0.023895325 |
| 17458542 | Gm4782        | -0.756916173 | 0.023895325 |
| 17205991 |               | 0.584405808  | 0.023927497 |
| 17378302 |               | 0.740941768  | 0.023945924 |
| 17308570 | Rb1           | 0.473605174  | 0.023954358 |
| 17529529 | Syncrip       | 0.491580322  | 0.023955492 |
| 17353241 | Slc25a46      | 0.530299298  | 0.023956872 |
| 17201591 |               | -0.76874155  | 0.023958379 |
| 17225261 | Ngef          | -0.410783543 | 0.023970491 |
| 17217728 | Kif21b        | -0.589616917 | 0.023991364 |
| 17470054 | Zfp422        | 0.572331702  | 0.024000364 |
| 17392399 |               | -1.027000253 | 0.024000364 |
| 17359927 |               | 0.745280324  | 0.024000364 |
| 17507306 |               | -0.979620554 | 0.024004361 |
| 17204589 |               | 1.399371356  | 0.024014627 |
| 17548168 | Gm10765       | -0.657820268 | 0.024060373 |
| 17547101 | Gm21428       | -0.455274702 | 0.024060373 |
| 17202579 |               | -0.536914335 | 0.024060373 |
| 17444916 |               | -0.491156978 | 0.024060373 |
| 17201189 |               | 0.840239072  | 0.024076301 |
| 17324322 | Ahsg          | 0.738614252  | 0.024077936 |
| 17424884 | Pax5          | -0.460149719 | 0.024077936 |
| 17347531 | Gm10190       | -0.60397562  | 0.02407929  |
| 17451947 | Gm5563        | -0.831268342 | 0.02407929  |
| 17548240 | Cog6          | 0.663290636  | 0.024090932 |
| 17366067 | D19Erttd737e  | 0.494560128  | 0.024090932 |
| 17257063 |               | 0.515522171  | 0.024090932 |
| 17249561 | Kif3a         | 0.617759832  | 0.024106077 |
| 17458990 | Lancl2        | 0.474592497  | 0.024106077 |
| 17448758 |               | -0.809991795 | 0.024106077 |
| 17550877 |               | -0.470862328 | 0.024106077 |
| 17274367 | Gm5784        | 0.698637579  | 0.024133498 |
| 17274893 | Sypl          | 0.546027311  | 0.024161374 |
| 17470740 | C1s           | -1.160037714 | 0.0241837   |
| 17549338 | Mir1247       | -1.08586357  | 0.0241837   |

|          |               |              |             |
|----------|---------------|--------------|-------------|
| 17227646 | Cfhr3         | -0.528331683 | 0.024199807 |
| 17233294 | Nus1          | 0.360943525  | 0.024199832 |
| 17381448 | Proser2       | 0.449107226  | 0.024199832 |
| 17538788 |               | -0.510091846 | 0.024199832 |
| 17271539 | BC006965      | -0.463939081 | 0.024208875 |
| 17225116 | Gm17017       | -0.49246176  | 0.024208875 |
| 17366724 | Mir669b       | -0.423290009 | 0.024208875 |
| 17282836 | Vipas39       | 0.763692742  | 0.024208875 |
| 17335308 | 1810013A23Rik | -0.636880178 | 0.024216801 |
| 17517215 | 2010007H06Rik | -0.49172171  | 0.024229768 |
| 17342656 | Nkx2-5        | -0.509528512 | 0.024240026 |
| 17494894 | St5           | -0.470749565 | 0.024240026 |
| 17297713 | Zmiz1         | -0.600104211 | 0.024240026 |
| 17317207 |               | 0.625510069  | 0.024241385 |
| 17297746 | Mir3075       | -0.541155651 | 0.024246152 |
| 17285267 | Lyst          | -0.848661934 | 0.02427493  |
| 17494152 | Olfr577       | -0.633642799 | 0.024299974 |
| 17419940 | Srsf10        | 0.702622091  | 0.024308296 |
| 17431454 | Nipal3        | 0.640092801  | 0.024369004 |
| 17408911 | Chi3l4        | -0.66154854  | 0.024369006 |
| 17449473 | Gc            | -0.622110471 | 0.02438879  |
| 17244543 |               | -0.776111705 | 0.02438879  |
| 17339073 |               | -0.780581883 | 0.02438879  |
| 17465478 | Mir182        | -0.905925437 | 0.024392212 |
| 17323759 | Ufd1l         | 0.640792481  | 0.024397312 |
| 17365863 | A630007B06Rik | 0.538293997  | 0.024412443 |
| 17540962 | C330007P06Rik | -0.461612126 | 0.024417348 |
| 17473018 | Caprin2       | 0.621930286  | 0.024423978 |
| 17529645 | Mir184        | -0.595432701 | 0.024439052 |
| 17219751 | Spta1         | -0.636016539 | 0.024441578 |
| 17302009 | Zc3h13        | 0.546343623  | 0.024464442 |
| 17294167 | BC018507      | 0.487578442  | 0.024479311 |
| 17393192 | Eif2s2        | 0.412270316  | 0.024479311 |
| 17285438 | Inhba         | -0.84853951  | 0.024479311 |
| 17477073 | Siglecg       | -0.572678729 | 0.024479311 |
| 17343856 | Btnl5         | -0.528979695 | 0.024485691 |
| 17543795 | Ftx           | 0.561573149  | 0.024485691 |
| 17351407 | Gm15958       | -0.487940909 | 0.024485691 |
| 17353554 | Hspa9         | 0.433264818  | 0.024485691 |
| 17329454 | Leprel1       | 0.864295384  | 0.024485691 |
| 17232853 | Mical1        | -0.615438345 | 0.024485691 |
| 17305590 | Mir327        | -0.560070175 | 0.024485691 |
| 17332269 | Setd4         | -0.478572395 | 0.024485691 |

|          |               |              |             |
|----------|---------------|--------------|-------------|
| 17497554 | Tubgcp2       | 0.555932511  | 0.024485691 |
| 17238880 |               | -0.694092767 | 0.024485691 |
| 17208585 |               | -0.751681144 | 0.024485691 |
| 17359636 | Abcc2         | -1.162365464 | 0.02451013  |
| 17312405 | Maf1          | 0.579910394  | 0.02451013  |
| 17433973 | Mir200a       | 0.460356953  | 0.024551601 |
| 17458892 | Avl9          | 0.52212992   | 0.024551643 |
| 17412801 | Chmp5         | 0.371010349  | 0.024551643 |
| 17469116 | Trh           | -1.455870113 | 0.024551643 |
| 17207285 |               | 0.705539436  | 0.024551643 |
| 17394727 | Tmem189       | 0.604605284  | 0.02455999  |
| 17223332 | Kctd18        | 0.547754027  | 0.024580545 |
| 17243019 |               | -1.372065748 | 0.024580545 |
| 17325874 | Cd200r4       | -0.827533974 | 0.024610796 |
| 17421534 | Fv1           | 0.642957043  | 0.024610796 |
| 17544335 | Rps12-ps9     | -0.459735778 | 0.024610796 |
| 17544337 | Rps12-ps9     | -0.459735778 | 0.024610796 |
| 17544339 | Rps12-ps9     | -0.459735778 | 0.024610796 |
| 17544341 | Rps12-ps9     | -0.459735778 | 0.024610796 |
| 17544343 | Rps12-ps9     | -0.459735778 | 0.024610796 |
| 17544333 | Vmn2r121      | -0.459735778 | 0.024610796 |
| 17508512 | 1700024N20Rik | -0.606974859 | 0.024612287 |
| 17231784 | Cited2        | 0.49068967   | 0.024612287 |
| 17504861 | Ctcf          | 0.411253313  | 0.024615473 |
| 17331838 | 2310079G19Rik | -0.803414788 | 0.02461818  |
| 17227852 | 7530420F21Rik | -0.448419327 | 0.024628052 |
| 17278305 | Serpina3j     | -0.588729735 | 0.024628052 |
| 17405119 | Mgarp         | 0.656395644  | 0.024646564 |
| 17260295 | Nudcd3        | 0.392836026  | 0.024664211 |
| 17206515 |               | 0.939708058  | 0.024664211 |
| 17260308 | Npc111        | -0.631551185 | 0.024670528 |
| 17368546 | Gm13421       | 0.740631892  | 0.024671102 |
| 17338642 | Ebi3          | -0.610180907 | 0.024713374 |
| 17322455 | Zfp263        | 0.560799615  | 0.024733603 |
| 17289029 |               | 0.790731775  | 0.024738359 |
| 17538281 | Gm15295       | -0.722785797 | 0.02474407  |
| 17486549 | Vmn2r55       | -1.080974442 | 0.024746432 |
| 17390950 | Cep152        | 0.488488703  | 0.024765772 |
| 17418982 | Rbbp4         | -0.443594343 | 0.024765772 |
| 17310357 | Slc45a2       | -0.572830866 | 0.024769251 |
| 17344472 | Atat1         | 0.530003799  | 0.024800883 |
| 17426944 | Fam154a       | -0.467601046 | 0.024808829 |
| 17336509 | H2-Eb2        | -0.513627716 | 0.024808829 |

|          |               |              |             |
|----------|---------------|--------------|-------------|
| 17254059 | Ccl12         | -1.583205115 | 0.024834778 |
| 17310893 | Mtdh          | 0.437675403  | 0.024834778 |
| 17361435 | Npas4         | -1.368826863 | 0.024834778 |
| 17322774 | Pmm2          | 0.614261474  | 0.024834778 |
| 17245167 |               | -0.421978449 | 0.024834778 |
| 17200211 |               | -0.87912859  | 0.024834778 |
| 17416762 |               | 0.583741734  | 0.024868377 |
| 17321768 | Bin2          | -1.529333008 | 0.02487248  |
| 17447331 | Cpz           | -1.011411129 | 0.02487248  |
| 17387822 | Olfr1173      | -0.45490077  | 0.02487248  |
| 17316770 |               | -0.586799265 | 0.024880568 |
| 17343882 | Egfl8         | -0.687336018 | 0.024892913 |
| 17400901 | Tbx15         | 0.757423788  | 0.024892913 |
| 17484106 |               | 0.535841096  | 0.024892913 |
| 17384008 | 1700019L03Rik | -0.581070522 | 0.024927453 |
| 17253912 | Rhot1         | 0.490529634  | 0.024927453 |
| 17458759 | Znrf2         | 0.675379272  | 0.024927453 |
| 17247896 |               | 0.464937562  | 0.024927453 |
| 17288948 | 2810049E08Rik | -0.418558537 | 0.0249432   |
| 17385767 | Fap           | 1.191824925  | 0.024943547 |
| 17208541 |               | -1.16826091  | 0.024943547 |
| 17343680 |               | -0.921396806 | 0.024967556 |
| 17321246 | Snora2b       | 0.915885939  | 0.024972942 |
| 17412191 | Coq3          | 0.45240941   | 0.024974453 |
| 17386683 | n-R5s198      | -0.675935652 | 0.024974453 |
| 17467996 | Mrpl19        | 0.445890792  | 0.025002384 |
| 17277758 |               | -0.768183387 | 0.025003478 |
| 17526315 | Phldb1        | -0.687627339 | 0.025022438 |
| 17438955 | Cxcl5         | -0.600014474 | 0.025037055 |
| 17334625 | Tsr3          | 0.583106587  | 0.025053501 |
| 17416596 | 4930407G08Rik | -0.667421867 | 0.025083118 |
| 17200327 |               | 1.101269173  | 0.025083118 |
| 17517097 | 1600029D21Rik | 0.913152063  | 0.025101583 |
| 17294421 | Cast          | 0.410722494  | 0.025160846 |
| 17522726 | Bcl2a1c       | -0.593916241 | 0.025185768 |
| 17270369 | Kif18b        | 0.802788215  | 0.02520763  |
| 17364932 | Got1          | 0.646855466  | 0.025212633 |
| 17431895 | Mrto4         | 0.491249328  | 0.025212633 |
| 17253258 | Coro6         | -0.544438369 | 0.025216118 |
| 17331203 | E330017A01Rik | -0.44260982  | 0.02521693  |
| 17450942 | Gm10416       | 0.780063049  | 0.025218763 |
| 17482126 |               | -0.736303365 | 0.025225226 |
| 17318210 | Eef1d         | 0.451422864  | 0.025242052 |

|          |               |              |             |
|----------|---------------|--------------|-------------|
| 17336396 | H2-Oa         | -0.598937303 | 0.025245496 |
| 17494828 | BC049265      | -0.71148486  | 0.025246166 |
| 17327613 | Nlrc3         | -0.662193602 | 0.025269023 |
| 17377471 | Gm14123       | -0.490454006 | 0.025297836 |
| 17201771 |               | -1.048401747 | 0.025297836 |
| 17201947 |               | -1.048401747 | 0.025297836 |
| 17226420 | Actr3         | 0.35704587   | 0.025305881 |
| 17448212 | Gm9954        | -0.628707839 | 0.025320842 |
| 17487078 | Psg23         | -0.492793886 | 0.025325057 |
| 17304353 | Cacna1d       | 0.62883053   | 0.025333922 |
| 17298642 | Lrrc18        | -0.462254105 | 0.025336837 |
| 17459786 | Lrrtm4        | 0.669003411  | 0.02535623  |
| 17494930 | Tmem9b        | 0.399715511  | 0.025358647 |
| 17404172 |               | -0.509819833 | 0.025358647 |
| 17392780 | Nanp          | 0.517278105  | 0.025358802 |
| 17207749 |               | 2.04525025   | 0.025358802 |
| 17513287 |               | -1.492099637 | 0.025374654 |
| 17431282 | Extl1         | -0.476762032 | 0.025384178 |
| 17549892 | Defa-rs2      | -0.454742568 | 0.025398007 |
| 17225329 | Hjurp         | 0.5544416    | 0.025412935 |
| 17423205 | Gm11815       | 1.203870857  | 0.025421526 |
| 17317209 |               | 0.692622408  | 0.025421526 |
| 17248613 | C1qtnf2       | -0.761451983 | 0.025437151 |
| 17388725 | Fjx1          | 0.931344349  | 0.025437151 |
| 17512103 | Got2          | 0.401223686  | 0.025437151 |
| 17540544 | Uxt           | 0.622921584  | 0.025437151 |
| 17445329 | Cdk14         | 0.504258322  | 0.025440017 |
| 17261266 | Prorsd1       | 0.475130436  | 0.025440017 |
| 17302347 | 4921530L21Rik | -0.353511422 | 0.025441275 |
| 17421057 | Gm13074       | -0.588546476 | 0.025441275 |
| 17379978 | Gm14236       | -0.4290081   | 0.025441275 |
| 17548961 | Gm19335       | -0.462748096 | 0.025441275 |
| 17278830 | Mir495        | 1.281269047  | 0.025441275 |
| 17274735 | Tmem18        | 0.774142755  | 0.025441275 |
| 17300054 | Trav9d-3      | -0.684828463 | 0.025441275 |
| 17445280 | Ankib1        | -0.472531146 | 0.02546792  |
| 17478195 | Gm15700       | -1.022585187 | 0.02547944  |
| 17410332 | Ccdc109b      | -0.445196253 | 0.025486134 |
| 17489229 | Etv2          | -0.500918886 | 0.025486134 |
| 17357207 | Tmem223       | -0.609751232 | 0.025486134 |
| 17507537 | Pcid2         | 0.496956011  | 0.025492471 |
| 17375718 | Usp8          | 0.529306982  | 0.025505342 |
| 17262464 | 5133400J02Rik | 0.804206264  | 0.025544224 |

|          |               |              |             |
|----------|---------------|--------------|-------------|
| 17374470 | Fam98b        | 0.700967305  | 0.025544224 |
| 17398825 | Insrr         | -0.559689525 | 0.025544224 |
| 17209891 |               | 0.964915726  | 0.025544283 |
| 17245095 | Cnot2         | 0.366776893  | 0.025572703 |
| 17234192 | Zwint         | 0.390771094  | 0.025577012 |
| 17328411 | Fopnl         | 0.581489191  | 0.02558971  |
| 17528783 | Pigb          | 0.823916776  | 0.02560353  |
| 17326844 |               | 0.987822676  | 0.025606856 |
| 17550655 |               | -0.580465443 | 0.025608003 |
| 17213548 | Nrp2          | -0.868099723 | 0.025612551 |
| 17225286 | Usp40         | 0.675031607  | 0.025612551 |
| 17210047 |               | -0.456166428 | 0.025612551 |
| 17547591 | Kansl1        | 0.75691492   | 0.025622087 |
| 17549006 |               | -0.919773574 | 0.025622087 |
| 17549134 |               | -0.919773574 | 0.025622087 |
| 17526269 |               | 0.646514313  | 0.025622087 |
| 17374833 | Nusap1        | 0.537405539  | 0.025654571 |
| 17481354 | Olfr687       | -0.517366655 | 0.025666891 |
| 17359787 | Peo1          | 0.502546194  | 0.025674202 |
| 17471879 |               | 0.630417139  | 0.025674202 |
| 17484030 | Hmx3          | -0.511013778 | 0.02569312  |
| 17408885 | Chi3l7        | -0.406611875 | 0.025699669 |
| 17492885 | 4933406J10Rik | -0.601600502 | 0.02569985  |
| 17207931 |               | 0.783044815  | 0.025705263 |
| 17324643 | Bdh1          | 0.555044786  | 0.02575799  |
| 17359834 | Btrc          | 0.587161297  | 0.02575799  |
| 17343962 | Cyp21a1       | -0.496438744 | 0.02575799  |
| 17489940 | GM16387       | -0.640695252 | 0.02575799  |
| 17449561 |               | -0.629621311 | 0.02575799  |
| 17263033 | Fam114a2      | 0.562319185  | 0.02577849  |
| 17290111 | Fgf10         | 0.535805546  | 0.02577849  |
| 17413678 | 1300002K09Rik | -0.477756007 | 0.025791248 |
| 17211752 | Arhgef4       | 0.539925377  | 0.025791248 |
| 17298312 | Glt8d1        | 0.40907929   | 0.025791248 |
| 17532649 | ND6           | -1.028624407 | 0.025792546 |
| 17383423 | 1700026L06Rik | -0.572386767 | 0.025795422 |
| 17399426 | Gm15417       | -0.466441261 | 0.025795422 |
| 17217171 | Gm7241        | -0.459351722 | 0.025795422 |
| 17229960 | Apcs          | -0.512313819 | 0.02580705  |
| 17404126 | Zfand1        | 0.649060249  | 0.02580705  |
| 17502369 | Olfr372       | -0.985952008 | 0.025811769 |
| 17423854 | Slc35a1       | 0.407872492  | 0.025811769 |
| 17203315 |               | -1.120029836 | 0.025811769 |

|          |               |              |             |
|----------|---------------|--------------|-------------|
| 17358009 |               | 0.616798536  | 0.02581722  |
| 17430209 |               | -0.476530883 | 0.02581722  |
| 17202427 |               | 1.199773856  | 0.025825727 |
| 17458043 | Cntnap2       | 0.710270387  | 0.025826599 |
| 17338280 | Med20         | 0.529852002  | 0.025853439 |
| 17233489 | Ccdc138       | 0.789938911  | 0.025854113 |
| 17291451 | Prl8a1        | -0.595373091 | 0.025864148 |
| 17330692 | Abhd10        | 0.601817565  | 0.025866522 |
| 17220188 | Sde2          | 0.809557465  | 0.025866522 |
| 17243016 |               | -0.590651376 | 0.025866522 |
| 17354233 | Pggt1b        | 0.531837944  | 0.025886791 |
| 17268820 | Ikzf3         | -0.451564094 | 0.025905598 |
| 17393839 | 9430008C03Rik | -0.673832343 | 0.02592704  |
| 17344757 | H2-M1         | -0.55177657  | 0.02592704  |
| 17414331 | BC026590      | 0.844026004  | 0.025937361 |
| 17305561 | Gm5624        | -0.908436842 | 0.025963588 |
| 17233271 |               | -0.471242036 | 0.025974972 |
| 17207479 |               | 0.495961523  | 0.025974972 |
| 17278787 | AF357341      | 0.759997619  | 0.025988869 |
| 17213462 | Cd28          | -0.41872635  | 0.025988869 |
| 17349520 | Ctnna1        | 0.630789731  | 0.025988869 |
| 17238642 | Olfr763       | -0.905445561 | 0.025988869 |
| 17461465 |               | -0.544479471 | 0.025988869 |
| 17366772 | Mir467a-3     | 0.80940526   | 0.025995501 |
| 17425228 | Mrpl50        | 0.444035149  | 0.025995501 |
| 17209943 |               | -1.003517408 | 0.025995501 |
| 17363683 | D19Bwg1357e   | 0.571115604  | 0.026003686 |
| 17206531 |               | -0.578670567 | 0.026024758 |
| 17231881 | Il20ra        | -0.398038464 | 0.026046939 |
| 17433426 | Tas1r1        | -0.393499941 | 0.026046939 |
| 17486039 | Vmn1r58       | -0.605603572 | 0.02605004  |
| 17466606 | Gimap6        | -0.476916169 | 0.026052004 |
| 17219457 |               | 0.489037895  | 0.026052663 |
| 17335456 | Gm16195       | -0.882873855 | 0.026091472 |
| 17214462 | Dnajb2        | 0.4010665    | 0.026092438 |
| 17398512 | Plrg1         | 0.526142166  | 0.026092438 |
| 17252882 | Rtn4rl1       | -0.436242734 | 0.026099097 |
| 17380838 |               | -0.928497569 | 0.026099097 |
| 17348069 | Gm1976        | 0.667837465  | 0.026117237 |
| 17403058 | Adh7          | 0.629709757  | 0.026124844 |
| 17378685 | Tldc2         | -0.577654087 | 0.0261287   |
| 17207167 |               | -0.746170495 | 0.026139163 |
| 17284910 | Calm5         | -0.461561744 | 0.026164349 |

|          |               |              |             |
|----------|---------------|--------------|-------------|
| 17532352 | Sec22c        | 0.616106448  | 0.026193529 |
| 17407536 | Gm17179       | -0.663863491 | 0.026197454 |
| 17346078 | Stap2         | 0.5470552    | 0.026197454 |
| 17274919 | Atxn7l1       | -0.485748262 | 0.026204145 |
| 17399737 | Gatad2b       | -0.466129977 | 0.026204145 |
| 17428850 | Rnf220        | 0.44902025   | 0.026244448 |
| 17209987 |               | -0.576715469 | 0.026244448 |
| 17278378 | Tcl1b4        | -0.771670098 | 0.026248289 |
| 17472192 | Mgp           | -0.816376457 | 0.026260044 |
| 17532063 | Acaa1b        | -0.827612265 | 0.026262796 |
| 17408945 | Cept1         | 0.437781878  | 0.026262796 |
| 17368163 | Obp2a         | -0.459064842 | 0.026262796 |
| 17319407 | Rps19bp1      | 0.475645878  | 0.02629904  |
| 17203135 |               | 0.98144473   | 0.02630079  |
| 17344511 | Abcf1         | 0.514380564  | 0.026307451 |
| 17536450 | Yipf6         | 0.476019987  | 0.026311816 |
| 17455971 | Mios          | 0.692135231  | 0.026331148 |
| 17541047 |               | -0.57870806  | 0.026331148 |
| 17291177 | Hist1h2bh     | -1.113267979 | 0.026365289 |
| 17221923 |               | -1.046100308 | 0.026365289 |
| 17461638 | Arpc4         | -0.466945517 | 0.026368387 |
| 17289860 | Gm15323       | -0.685544031 | 0.026372841 |
| 17440328 | Vmn2r16       | -0.606044715 | 0.026374876 |
| 17243469 | Zfp938        | 0.852584377  | 0.026399629 |
| 17315463 | Map3k12       | 0.582298597  | 0.0264202   |
| 17447289 | Nop14         | 0.483541851  | 0.0264202   |
| 17547980 | Olfr175-ps1   | 0.931309036  | 0.0264202   |
| 17373996 | BC048594      | 0.56598874   | 0.02643412  |
| 17282348 | Synj2bp       | 0.627712061  | 0.02643412  |
| 17434490 | Steap4        | -1.027613283 | 0.026448216 |
| 17383788 | Gm13427       | -0.370933172 | 0.026453513 |
| 17412593 | Srsf12        | 0.575038973  | 0.026453513 |
| 17239184 | Adgb          | -0.559705386 | 0.026472993 |
| 17365960 | Gfra1         | 0.77832824   | 0.026472993 |
| 17465270 |               | -0.834146113 | 0.026472993 |
| 17229391 | Uck2          | 0.361718686  | 0.026494468 |
| 17280682 | 4930556N08Rik | -0.46168971  | 0.026519333 |
| 17445699 |               | -0.532065645 | 0.026522701 |
| 17328823 | Gsc2          | -0.56289044  | 0.026533514 |
| 17279190 | Trmt61a       | 0.710157855  | 0.026537406 |
| 17498730 | 1810033B17Rik | -0.49974213  | 0.026545712 |
| 17240621 | Aim1          | 0.590393952  | 0.026545712 |
| 17325719 | Ndufs5        | 0.727671185  | 0.026545712 |



|          |               |              |             |
|----------|---------------|--------------|-------------|
| 17206819 |               | -0.572689627 | 0.026545712 |
| 17395079 | Zbp1          | -0.396713187 | 0.026555317 |
| 17227259 | Arl8a         | 0.609476327  | 0.02656917  |
| 17483075 | Bola2         | -0.486536064 | 0.02656917  |
| 17455254 | Usp12         | 0.471308328  | 0.026572167 |
| 17490839 | Bax           | 0.591574188  | 0.026583872 |
| 17360501 | Tcf7l2        | 0.51882169   | 0.026585663 |
| 17209833 |               | 0.696601685  | 0.026591949 |
| 17513194 | Adat1         | 0.738424755  | 0.02660767  |
| 17351330 | Malt1         | 0.579354369  | 0.026645393 |
| 17361600 | Ccdc85b       | -0.400030081 | 0.02666628  |
| 17331311 | Arl6          | 0.600091098  | 0.026688417 |
| 17541681 | Gpc3          | -0.499364597 | 0.026693406 |
| 17220051 | LOC101056322  | -0.650398646 | 0.026693406 |
| 17489759 | C230052l12Rik | 0.632850819  | 0.026697347 |
| 17460578 |               | 0.874696955  | 0.026697347 |
| 17201199 |               | 0.674835466  | 0.026697347 |
| 17312358 | Smpd5         | -0.417631744 | 0.026700239 |
| 17247993 | Smek2         | 0.486019574  | 0.026704084 |
| 17543069 | Mageb4        | -0.677798977 | 0.026707914 |
| 17276098 | Tomm20l       | -0.621117355 | 0.026707914 |
| 17380526 | Gm14432       | 0.74109053   | 0.026710584 |
| 17277404 | Batf          | -0.424670433 | 0.026729744 |
| 17265657 | Smtnl2        | -0.556536901 | 0.026729744 |
| 17348812 | Dsg2          | 0.997961695  | 0.026774639 |
| 17536428 | Pgr15l        | -0.776259264 | 0.026774639 |
| 17448082 | Sepsecs       | 0.964259517  | 0.026774639 |
| 17206333 |               | -0.953917974 | 0.026774639 |
| 17460891 | Fbln2         | -0.826862002 | 0.026781976 |
| 17488492 | Nccrp1        | -0.438802052 | 0.026781976 |
| 17425287 | Vma21-ps      | 0.510437949  | 0.026781976 |
| 17202433 |               | -1.364543436 | 0.026781976 |
| 17376341 | Ptpa          | 0.408556109  | 0.026783004 |
| 17259276 | Bahcc1        | -0.590628461 | 0.026799915 |
| 17466253 | Prss58        | -0.421365891 | 0.026804953 |
| 17308477 |               | 1.373147416  | 0.026804953 |
| 17456584 | Calu          | 0.358945342  | 0.026812413 |
| 17287368 |               | -0.464081608 | 0.026812413 |
| 17239695 | 4930444G20Rik | -0.774405418 | 0.026816427 |
| 17456804 | Nrf1          | 0.415837282  | 0.026816427 |
| 17510358 | Nxn1          | -0.634561884 | 0.026820378 |
| 17238002 | R3hdm2        | -0.415731196 | 0.026820378 |
| 17550310 |               | -0.516759934 | 0.026820378 |

|          |               |              |             |
|----------|---------------|--------------|-------------|
| 17538356 | Alg13         | 0.54537567   | 0.026829053 |
| 17422832 | Fam132a       | -0.595280198 | 0.026829053 |
| 17391510 | Gm14025       | -0.457873154 | 0.026838207 |
| 17356794 | Men1          | 0.511613478  | 0.026839011 |
| 17346069 | Zfp119b       | 0.604819819  | 0.026842422 |
| 17541924 |               | -0.660552364 | 0.026845754 |
| 17484587 | Cyp2e1        | -0.590771974 | 0.02685755  |
| 17356061 | Doc2g         | 0.430558528  | 0.026890074 |
| 17423189 | 4930448K20Rik | -0.37613793  | 0.026895511 |
| 17494662 | Gm18853       | -0.41490821  | 0.026895511 |
| 17220944 | Lamb3         | 0.481031539  | 0.026895511 |
| 17354189 | Mcc           | 0.530251044  | 0.026895511 |
| 17278812 | Mir1197       | 1.1004576    | 0.026895511 |
| 17494576 | Rrp8          | 0.560373637  | 0.026895511 |
| 17461082 | Slc25a26      | 0.505074549  | 0.026895511 |
| 17383284 | Vav2          | -0.476755623 | 0.026895511 |
| 17384622 | Zbtb6         | 0.587700706  | 0.026895511 |
| 17201623 |               | -0.484176243 | 0.026895511 |
| 17383347 | 2810430I11Rik | -0.577918808 | 0.026913556 |
| 17341704 |               | 1.360369244  | 0.026921669 |
| 17307472 | Kpna3         | 0.423106529  | 0.026925318 |
| 17550548 | ND6           | -1.201875518 | 0.026925318 |
| 17488845 | Sipa1l3       | -0.369903377 | 0.026936769 |
| 17209773 |               | -0.857679681 | 0.026936769 |
| 17382920 | Card9         | -0.415487057 | 0.026941837 |
| 17515726 | Gm7244        | -0.709361539 | 0.026941837 |
| 17437213 | Cd38          | -0.906994003 | 0.02694328  |
| 17471342 | Fkbp4         | 0.403903162  | 0.026987415 |
| 17256414 | Nkiras2       | 0.457723272  | 0.026987415 |
| 17275392 | Ap4s1         | 0.525934822  | 0.026988254 |
| 17268611 | Cwc25         | 0.462669079  | 0.026988254 |
| 17429892 | 1700125G02Rik | -0.61932565  | 0.027019943 |
| 17299800 | Trav8d-1      | -0.607940752 | 0.027020813 |
| 17541010 | Upf3b         | 0.573994003  | 0.027020813 |
| 17353453 | 4933408B17Rik | -0.37451049  | 0.027032075 |
| 17263482 | Cops3         | 0.414230888  | 0.027032075 |
| 17511500 | Gm2716        | -0.567719647 | 0.027032075 |
| 17506854 | Tsnax         | 0.542532104  | 0.027032075 |
| 17204883 |               | 1.035899822  | 0.027032075 |
| 17548046 | Pcdhga10      | -0.665398024 | 0.02707752  |
| 17438980 | Il8           | 1.012229517  | 0.027093442 |
| 17484907 | Rplp2         | -0.687455345 | 0.027096059 |
| 17518172 | Anp32a        | 0.407735992  | 0.027119667 |

|          |               |              |             |
|----------|---------------|--------------|-------------|
| 17225582 | Olfr1414      | -0.550841982 | 0.027119667 |
| 17512677 | Cdh1          | 0.649943873  | 0.027125107 |
| 17295136 | Iqgap2        | -0.495702722 | 0.027140865 |
| 17301256 | Sox7          | 0.99332056   | 0.027144871 |
| 17549240 |               | -0.521526174 | 0.027144871 |
| 17549172 | Cd99          | -0.505760146 | 0.027172858 |
| 17346936 | Tgif1         | 0.424825607  | 0.027201401 |
| 17539820 | Mir501        | -0.847219867 | 0.027204022 |
| 17331692 | Cypr1         | -0.592548626 | 0.027244235 |
| 17265282 | Gm12316       | -0.428152987 | 0.027259246 |
| 17265631 | Slc13a5       | 0.957016395  | 0.027295082 |
| 17204505 |               | -0.618618203 | 0.027295082 |
| 17257085 | Hexim1        | 0.615804824  | 0.027297463 |
| 17248821 | Gm12169       | -0.577154019 | 0.027307596 |
| 17469488 | Pdzrn3        | -0.719350931 | 0.027315047 |
| 17491999 | Lrrc28        | 0.635212577  | 0.027315337 |
| 17211562 |               | -0.646443421 | 0.027362561 |
| 17305310 | Gm3676        | -0.549996344 | 0.027371117 |
| 17300798 |               | -0.561272975 | 0.027371117 |
| 17515238 | AB124611      | -0.893030203 | 0.027391399 |
| 17419880 | Ifnlr1        | 0.369887701  | 0.027399698 |
| 17224551 | Ptpn          | -0.886787884 | 0.027399698 |
| 17454789 | Gm3925        | -0.414372709 | 0.027405202 |
| 17206417 |               | 1.198477354  | 0.027405202 |
| 17526127 | Gm10687       | -0.540843893 | 0.027420005 |
| 17267651 | Gm11497       | -0.456834203 | 0.027420005 |
| 17424651 | Gm12454       | -0.498052011 | 0.027420005 |
| 17346276 | Gm20219       | 0.631868611  | 0.027420005 |
| 17282395 | n-R5s63       | -0.515495155 | 0.027420005 |
| 17357891 | Olfr1445      | -0.57846929  | 0.027420005 |
| 17206305 |               | 1.414820856  | 0.027420005 |
| 17549028 |               | -0.833311682 | 0.027420005 |
| 17542997 | Gm7173        | 0.600460305  | 0.027421695 |
| 17262124 | 2310031A07Rik | 0.440635865  | 0.027427029 |
| 17510635 | Gm10649       | -0.466157325 | 0.027473852 |
| 17450718 | Fam69a        | 0.609439963  | 0.027474055 |
| 17217127 | Nucks1        | 0.510336203  | 0.027475285 |
| 17517218 | Gm7293        | -0.898653866 | 0.02750528  |
| 17270091 |               | -0.654391222 | 0.027513569 |
| 17249922 |               | 0.425651008  | 0.027529278 |
| 17340229 | Gm19773       | -0.901625217 | 0.027533671 |
| 17395186 | Gm14618       | -0.378208495 | 0.027535833 |
| 17249151 | Mgat4b        | -0.491102103 | 0.027535833 |

|          |               |              |             |
|----------|---------------|--------------|-------------|
| 17206475 |               | 0.593629777  | 0.027535833 |
| 17548806 | Gm9429        | -0.423233679 | 0.027555097 |
| 17291122 | Zfp322a       | 0.66330011   | 0.02759644  |
| 17448771 |               | -1.044262863 | 0.02764054  |
| 17509506 | Clcn3         | 0.658422432  | 0.027645602 |
| 17426348 | Tnfsf15       | 0.425777954  | 0.027664049 |
| 17309832 | C6            | -0.445258925 | 0.027664558 |
| 17212792 | Hibch         | 0.365039954  | 0.027664558 |
| 17264980 | Spem1         | -0.838198089 | 0.027672243 |
| 17447506 | Bloc1s4       | 0.530397977  | 0.027695462 |
| 17511834 | Bbs2          | 0.553688398  | 0.02769696  |
| 17423507 |               | -0.581815602 | 0.027704685 |
| 17288898 | Lysmd3        | 0.5006714    | 0.027731851 |
| 17374488 | Thbs1         | -0.535637255 | 0.027731851 |
| 17238984 | Mtrf1l        | 0.524882903  | 0.027757065 |
| 17208763 |               | 1.407434207  | 0.027762573 |
| 17550627 |               | -0.923363749 | 0.027766217 |
| 17282450 | LOC101055670  | -0.478702377 | 0.027785555 |
| 17418116 | 4933421A08Rik | -0.543263316 | 0.027797538 |
| 17277134 | Acot2         | 0.633086725  | 0.027801837 |
| 17308956 | 9630013A20Rik | -0.952826232 | 0.02781905  |
| 17262823 | Il3           | -0.451835856 | 0.02781905  |
| 17306201 | Supt16        | 0.779897716  | 0.02781905  |
| 17357221 |               | 0.827447419  | 0.02781905  |
| 17460583 |               | 0.858804628  | 0.02781905  |
| 17336949 |               | 2.05506691   | 0.02781905  |
| 17489242 |               | -0.582023126 | 0.02781905  |
| 17306130 | Gm17078       | 0.700490104  | 0.027824222 |
| 17393825 | 9430008C03Rik | 0.473425995  | 0.027825448 |
| 17477540 | Vrk3          | 0.401872262  | 0.027825448 |
| 17445238 | Kl            | -0.505738819 | 0.0278457   |
| 17498592 | 1700019B03Rik | -0.428629609 | 0.027856509 |
| 17215601 | D130058E05Rik | -0.442441388 | 0.027878365 |
| 17456560 | Fam71f2       | -0.396743723 | 0.027878365 |
| 17322113 | Krt8          | 0.666612386  | 0.027878365 |
| 17389740 | Plcb2         | -0.579692321 | 0.027884058 |
| 17434333 | Pex1          | 0.452778564  | 0.027889958 |
| 17319324 | Dnal4         | 0.425898037  | 0.027918651 |
| 17521252 | Iqcf1         | -0.694282783 | 0.027926012 |
| 17309420 | Abcc4         | 0.763251779  | 0.027950071 |
| 17410311 | Rrh           | -0.470922851 | 0.027960279 |
| 17334599 | BC003965      | 0.361566569  | 0.027962423 |
| 17344303 | Lst1          | -0.519837971 | 0.027962423 |

|          |               |              |             |
|----------|---------------|--------------|-------------|
| 17438314 | Tmem165       | 0.441337978  | 0.027962423 |
| 17448756 |               | -0.814944694 | 0.027968456 |
| 17431516 | Pithd1        | 0.485066217  | 0.027970901 |
| 17352662 | Esco1         | 0.532092614  | 0.027981348 |
| 17265211 | Alox12e       | -0.574940329 | 0.027995903 |
| 17202973 |               | 0.856769572  | 0.027998987 |
| 17299569 | Rnase10       | -0.36760901  | 0.028022818 |
| 17342538 | A930017K11Rik | -0.652181833 | 0.028034656 |
| 17208347 |               | -0.877247331 | 0.028037707 |
| 17514933 | Olfr855       | -0.799200349 | 0.028045164 |
| 17341701 |               | 0.680193716  | 0.028045164 |
| 17325938 | Btla          | -0.530493747 | 0.028045414 |
| 17477728 | Pth2          | -0.666468428 | 0.028059935 |
| 17439064 | Uso1          | 0.361516478  | 0.028059935 |
| 17507159 |               | -0.751809497 | 0.028059935 |
| 17431546 | Rpl11         | 0.493216955  | 0.028091181 |
| 17388234 | F2            | 0.950970711  | 0.028094866 |
| 17207777 |               | 0.876664547  | 0.028097085 |
| 17354764 | Arhgef37      | 0.489917972  | 0.028106903 |
| 17351886 | Smad2         | 0.511307179  | 0.028127665 |
| 17340148 | Camkmt        | 0.566901742  | 0.028138501 |
| 17468816 | Mcm2          | -0.820798922 | 0.028138501 |
| 17311783 |               | -0.519964837 | 0.028138501 |
| 17397142 | Spata5        | 0.492255427  | 0.028149841 |
| 17546333 | Rbmy          | -0.543920896 | 0.028165386 |
| 17231301 | Cr1l          | 0.390671976  | 0.028168396 |
| 17305967 | Ttc5          | 0.651064436  | 0.028180884 |
| 17201633 |               | -0.543766685 | 0.028183462 |
| 17349262 | Ercc3         | 0.512316725  | 0.028219735 |
| 17300032 | Trav12-2      | -0.855381274 | 0.028219735 |
| 17415369 | Ifna4         | -0.493454899 | 0.028224941 |
| 17475429 |               | -0.512080187 | 0.028250843 |
| 17429569 | Rlf           | 0.586416838  | 0.028253011 |
| 17204089 |               | 1.765240904  | 0.028253011 |
| 17389994 | Gm13999       | -0.518743074 | 0.028260467 |
| 17219451 |               | 0.52870075   | 0.028276839 |
| 17278814 | Mir323        | 1.139894258  | 0.028286799 |
| 17550685 |               | -0.552891283 | 0.028286799 |
| 17288859 | Gm8327        | 0.715577445  | 0.028304789 |
| 17503910 | Ogfod1        | 0.527378788  | 0.028304789 |
| 17370511 | Wdr38         | 0.591709123  | 0.028304789 |
| 17513548 |               | -0.995974998 | 0.028304789 |
| 17547606 | Gm9734        | -0.447992991 | 0.028317824 |

|          |               |              |             |
|----------|---------------|--------------|-------------|
| 17462893 | C1rb          | -0.871753903 | 0.028361117 |
| 17227589 | Lhx9          | -0.747355805 | 0.028361117 |
| 17502970 | Ptger1        | -0.498536118 | 0.028367381 |
| 17238325 | Timeless      | 0.656703358  | 0.028367381 |
| 17520675 | Foxl2         | -0.554548691 | 0.028368553 |
| 17548141 | Gm13392       | -0.490675783 | 0.028371768 |
| 17410190 | Larp7         | 0.712370699  | 0.028371768 |
| 17492703 | Wdr73         | 0.478261553  | 0.028371768 |
| 17511885 |               | -0.731597272 | 0.028371768 |
| 17528836 | Mapk6         | 0.493118728  | 0.028372798 |
| 17287403 | Gm2762        | -0.479927083 | 0.0283954   |
| 17295196 | Ankdd1b       | 0.693440517  | 0.028433992 |
| 17421469 | Rex2          | -0.847114111 | 0.028433992 |
| 17341743 | Tbc1d24       | 0.767994641  | 0.028433992 |
| 17520537 | Gk5           | 0.785404985  | 0.028447845 |
| 17223777 | Mettl21a      | 0.496688732  | 0.028450294 |
| 17500975 | 4933411K20Rik | 0.576548793  | 0.028462715 |
| 17228751 | Rabgap1l      | 0.498133027  | 0.028498181 |
| 17218006 | B3galt2       | 0.415166754  | 0.028512549 |
| 17390490 | Ppip5k1       | -0.490114561 | 0.028523049 |
| 17503287 | Prdx2         | 0.361677139  | 0.028526117 |
| 17202755 |               | 0.709967803  | 0.028526117 |
| 17300888 | B020004C17Rik | -0.366735244 | 0.028532751 |
| 17392652 | 3300002I08Rik | 0.624193876  | 0.028532944 |
| 17433543 | Dffb          | 0.645340259  | 0.028532944 |
| 17548381 | Scp2d1        | -0.42251092  | 0.028532944 |
| 17461080 |               | -0.56759893  | 0.028569248 |
| 17444609 | Arpc1b        | -0.510815295 | 0.028614066 |
| 17538405 |               | -0.537264949 | 0.028616505 |
| 17444216 | Ap5z1         | -0.365097631 | 0.028657838 |
| 17506460 | Cdh15         | -0.491502688 | 0.028657838 |
| 17203903 |               | 1.545285734  | 0.028657838 |
| 17549070 |               | -0.773611306 | 0.028691743 |
| 17210725 |               | -1.001988682 | 0.028695885 |
| 17292612 | Auh           | 0.364044071  | 0.028711282 |
| 17414536 | Slc31a2       | 0.767169586  | 0.028711282 |
| 17275490 | Srp54c        | 0.511160732  | 0.028711282 |
| 17275516 | Srp54c        | 0.511160732  | 0.028711282 |
| 17238061 | Gm16217       | -0.537162381 | 0.028715584 |
| 17548221 | Spcs2         | 0.41056602   | 0.028716709 |
| 17239693 |               | -0.482950386 | 0.028716709 |
| 17510772 | Hhip          | 0.862949381  | 0.028726066 |
| 17257064 |               | 0.430159967  | 0.02873234  |

|          |               |              |             |
|----------|---------------|--------------|-------------|
| 17204185 |               | 0.687222119  | 0.02873234  |
| 17200343 |               | -0.682876954 | 0.028745339 |
| 17301634 | Gm21451       | -0.475665449 | 0.028756091 |
| 17431075 | Arid1a        | -0.511812611 | 0.028762251 |
| 17478985 | Snrpa1        | 0.530856904  | 0.028773407 |
| 17305929 | Olfr724       | 0.696806064  | 0.028777059 |
| 17538823 |               | -0.617442658 | 0.028781008 |
| 17295607 | Naip6         | -0.729866541 | 0.028781201 |
| 17344453 | 5530401N12Rik | -0.414311245 | 0.028797499 |
| 17551137 |               | -0.89994076  | 0.028798097 |
| 17206677 |               | -0.846130815 | 0.02880464  |
| 17427185 | 4930577H14Rik | -0.412858339 | 0.028817054 |
| 17482730 | Dctn5         | 0.580830837  | 0.028818529 |
| 17548703 | Irf8          | -0.529936972 | 0.028819185 |
| 17285398 | AW209491      | 0.615036411  | 0.02885103  |
| 17523673 | 4930526I15Rik | -0.422882438 | 0.028855354 |
| 17528739 |               | -0.715323153 | 0.028855767 |
| 17348016 | Nrxn1         | 1.023886901  | 0.028858615 |
| 17403875 | 1810013D15Rik | -0.610765619 | 0.028895151 |
| 17446185 | Fastk         | -0.382285457 | 0.028895151 |
| 17534090 | Gm6268        | -0.445936157 | 0.028895151 |
| 17528229 | Ptplad1       | 0.640447289  | 0.028912694 |
| 17274649 | Adi1          | 0.46679019   | 0.028964114 |
| 17328236 | Gm6327        | -0.54360754  | 0.028969919 |
| 17415919 | Gm12801       | -0.435042525 | 0.028972799 |
| 17256932 | Tmub2         | 0.403636888  | 0.028972799 |
| 17463108 | Nop2          | 0.710605563  | 0.029007773 |
| 17279916 | Gdf7          | -0.603817967 | 0.029018465 |
| 17406960 | Mir92b        | -0.921711799 | 0.029052216 |
| 17539832 | 2010204K13Rik | 0.492264076  | 0.029053593 |
| 17388432 | Gm13802       | -0.66959888  | 0.029053593 |
| 17228106 | Smg7          | 0.466901451  | 0.029053593 |
| 17326266 | Senp7         | 0.919917275  | 0.029073473 |
| 17518320 | Snpc5         | 0.664471518  | 0.029116521 |
| 17353619 | Mzb1          | -0.431372887 | 0.029122762 |
| 17464941 |               | -0.708896928 | 0.029122762 |
| 17244439 | Plxnc1        | -0.598514795 | 0.029124483 |
| 17245466 | Tbc1d30       | 0.83748561   | 0.029125987 |
| 17378319 |               | 0.788701433  | 0.029125987 |
| 17455386 | Slc46a3       | 0.665765749  | 0.029172342 |
| 17548662 | Gm5606        | -0.369076925 | 0.029177624 |
| 17271572 | 2610035D17Rik | 0.722714887  | 0.029188637 |
| 17358119 | Zfand5        | 0.417162233  | 0.029188637 |

|          |               |              |             |
|----------|---------------|--------------|-------------|
| 17240661 |               | -0.556351689 | 0.029188637 |
| 17290388 | Idi2          | 0.617108804  | 0.029189551 |
| 17302234 | Zbtbd6        | 0.52419294   | 0.029214801 |
| 17231621 | 4930567K20Rik | -0.451114756 | 0.029226493 |
| 17382392 | Nelfb         | 0.485610463  | 0.029246936 |
| 17323603 | Scarf2        | -0.716337871 | 0.029246936 |
| 17538783 |               | -0.764081062 | 0.02926223  |
| 17242861 | Pcsk4         | -0.405099306 | 0.029287215 |
| 17365686 | 1700001K23Rik | -0.549543624 | 0.029295715 |
| 17288324 | 9430065F17Rik | 0.483530205  | 0.029295715 |
| 17515835 | Ets1          | 0.39697551   | 0.029295715 |
| 17510983 | Prkaca        | -1.002372208 | 0.029295715 |
| 17546367 | Rbmy          | -0.448813673 | 0.029295715 |
| 17419037 |               | -0.462647    | 0.029295715 |
| 17322075 | Krt4          | 1.381017736  | 0.029302009 |
| 17301854 | Rcbtb2        | 0.669061775  | 0.029318317 |
| 17409053 | Ahcyl1        | 0.44680604   | 0.029347508 |
| 17535045 | Gm14718       | -0.520011549 | 0.029347508 |
| 17532908 | Gpkow         | 0.359241639  | 0.029377811 |
| 17405261 | Rfxap         | 0.647108453  | 0.029379562 |
| 17550484 | Zfhx2as       | -0.506596902 | 0.029385263 |
| 17208617 |               | 0.846648382  | 0.029385263 |
| 17337832 |               | -0.737071923 | 0.029385263 |
| 17410680 | Metap1        | 0.588423082  | 0.029386286 |
| 17541567 | 6720401G13Rik | 0.681686775  | 0.029406456 |
| 17331162 | Col8a1        | -0.657137461 | 0.029423179 |
| 17526956 | Layn          | -0.83842338  | 0.029423179 |
| 17246743 | Rnf215        | 0.439972708  | 0.029423179 |
| 17533413 | Rpl3          | 0.45678946   | 0.029423179 |
| 17372679 | Ssrp1         | 0.589861601  | 0.029423179 |
| 17461153 |               | -1.352783736 | 0.029423435 |
| 17236313 | Nup37         | 0.389108583  | 0.029445539 |
| 17278328 | Serpina3n     | -0.980501729 | 0.029446426 |
| 17366451 | Frmd4a        | 0.586918469  | 0.029450635 |
| 17366926 | Mir466n       | 0.834952294  | 0.029463102 |
| 17243450 | 4933439G19Rik | 0.587575189  | 0.029468852 |
| 17366910 |               | 0.966021229  | 0.029468852 |
| 17446434 | Gm10220       | -0.479549039 | 0.029480329 |
| 17339388 |               | -0.518857598 | 0.029480329 |
| 17507605 | Gas6          | -0.776029908 | 0.029489373 |
| 17201349 |               | -0.635252835 | 0.029500163 |
| 17401545 | Kcna10        | -0.387877396 | 0.029503938 |
| 17548816 | Mageb17-ps    | -0.625335933 | 0.029503938 |



|          |          |              |             |
|----------|----------|--------------|-------------|
| 17327035 | Olig1    | -0.661631378 | 0.029503938 |
| 17337411 | H2-M11   | -0.43130646  | 0.029535383 |
| 17284175 | BC048943 | 0.521888111  | 0.029540353 |
| 17207459 |          | 0.920750551  | 0.029551532 |
| 17509879 | Cilp2    | -0.618372921 | 0.02956679  |
| 17331859 | Gm20741  | -0.686861811 | 0.02956679  |
| 17358706 | Pten     | 0.392884612  | 0.02956679  |
| 17247562 | Vps54    | 0.413564913  | 0.02956679  |
| 17549066 |          | -0.845984612 | 0.029570782 |
| 17317898 | Mir151   | -0.950582048 | 0.029597069 |
| 17514592 | Mmp7     | -0.489545092 | 0.029597069 |
| 17407339 |          | 1.023041011  | 0.029598631 |
| 17356314 | Mrpl11   | 0.657882248  | 0.029607849 |
| 17322483 |          | 0.663407714  | 0.029610089 |
| 17237784 | Gm4129   | -0.472786753 | 0.029640398 |
| 17420823 | Gm13029  | -0.553491338 | 0.029643259 |
| 17249483 | Zcchc10  | 0.655593183  | 0.029643259 |
| 17520169 |          | 0.634497639  | 0.029650087 |
| 17416440 | Ldlrad1  | -0.610343995 | 0.029654712 |
| 17548176 | Acss1    | -0.545967699 | 0.029684384 |
| 17519794 | Senp6    | 0.509275612  | 0.029701187 |
| 17364390 |          | -0.529168297 | 0.029701187 |
| 17504074 | Cpne2    | -0.414648776 | 0.029717466 |
| 17359079 | Cyp26c1  | -0.83509345  | 0.029717466 |
| 17478883 | Mcee     | 0.474037296  | 0.029717466 |
| 17374747 | Zfyve19  | 0.36302498   | 0.029717466 |
| 17233064 |          | 1.118330984  | 0.029727653 |
| 17428854 |          | 0.925043142  | 0.029789941 |
| 17257937 | Kcnj2    | 1.072239406  | 0.029793808 |
| 17535033 | Vgll1    | 0.555916767  | 0.029796761 |
| 17289181 | Arsb     | -0.766018515 | 0.029804974 |
| 17303941 | Ap3m1    | 0.460226597  | 0.029844486 |
| 17264835 | Cd68     | -0.701686328 | 0.029878534 |
| 17362646 | Dagla    | -0.492815397 | 0.029878534 |
| 17334097 | Cldn6    | 0.912837452  | 0.02989773  |
| 17200521 |          | 1.52309396   | 0.02989773  |
| 17287361 | Gadd45g  | 0.50208001   | 0.02992334  |
| 17330410 | Arhgap31 | -0.63689539  | 0.029927687 |
| 17260331 | Ddx56    | 0.566043564  | 0.029927687 |
| 17472497 | Gys2     | -0.404704462 | 0.029927687 |
| 17200007 |          | 1.376792869  | 0.029932203 |
| 17516960 | Cadm1    | -0.647404607 | 0.029942826 |
| 17204739 |          | -1.130753022 | 0.029949833 |

|          |          |              |             |
|----------|----------|--------------|-------------|
| 17204757 |          | 0.98795149   | 0.029972672 |
| 17214759 | Rhbdd1   | 0.540829983  | 0.030004564 |
| 17484832 | Drd4     | -0.479905487 | 0.030007174 |
| 17219542 | Pigm     | 0.41766736   | 0.030007174 |
| 17330150 |          | -1.031660327 | 0.030007174 |
| 17404019 |          | -0.395955483 | 0.030007174 |
| 17313788 | Fam118a  | 0.665348701  | 0.030008621 |
| 17403829 | Negr1    | 0.661960914  | 0.030009582 |
| 17323828 | B3gnt5   | 0.752691153  | 0.030039674 |
| 17206751 |          | 0.869894562  | 0.030039674 |
| 17508036 | Slc25a15 | 0.50887612   | 0.030050963 |
| 17217625 | Tnni1    | -0.59896705  | 0.030050963 |
| 17468895 | Chst13   | -0.580260818 | 0.030057602 |
| 17343505 | Cyp4f13  | 0.586585886  | 0.030057602 |
| 17340983 | Wtap     | 0.383523601  | 0.030057602 |
| 17533890 | Gm14552  | -0.385624277 | 0.030061085 |
| 17417647 | Tctex1d4 | -0.656175935 | 0.030061085 |
| 17203249 |          | 0.706976297  | 0.030061085 |
| 17210103 |          | -0.948153733 | 0.030061085 |
| 17514719 | Fam76b   | 0.389724672  | 0.030064853 |
| 17245850 | Mars     | 0.625697256  | 0.030064853 |
| 17297551 | Vcl      | -0.449765046 | 0.030064853 |
| 17206597 |          | -0.912301949 | 0.030064853 |
| 17496867 | BC017158 | 0.607149936  | 0.030095808 |
| 17446211 | Gm10472  | -0.567221847 | 0.030095808 |
| 17516131 | Olfr884  | -0.558510741 | 0.030110297 |
| 17308954 |          | -0.804260841 | 0.030110297 |
| 17480829 | Arap1    | -0.578190735 | 0.030137031 |
| 17482958 | Il21r    | -0.788687919 | 0.030137643 |
| 17498870 | Shcbp1   | 0.946750021  | 0.030157595 |
| 17459470 | Gm1070   | -0.497108204 | 0.030180046 |
| 17467435 | Igkv4-71 | -0.561496826 | 0.030184868 |
| 17483740 | Inpp5f   | 0.524845328  | 0.030206059 |
| 17513503 | Zdhhc7   | 0.692809241  | 0.030225992 |
| 17283871 | Bcl11b   | 0.55906376   | 0.030243078 |
| 17394902 | Gm14260  | -0.785938512 | 0.030243078 |
| 17408289 | Gm4450   | -0.583936814 | 0.030243078 |
| 17398384 | Ppid     | 0.59833335   | 0.030243078 |
| 17202519 |          | -0.586624779 | 0.030243078 |
| 17465696 | Slc35b4  | 0.628469552  | 0.030259288 |
| 17327331 | Chaf1b   | 0.783519591  | 0.030266213 |
| 17256033 | Grb7     | 0.708057817  | 0.030268485 |
| 17545814 | Scml1    | -0.439783289 | 0.030268485 |

|          |               |              |             |
|----------|---------------|--------------|-------------|
| 17411520 |               | -0.597977672 | 0.030268485 |
| 17204383 |               | 1.360446725  | 0.030268485 |
| 17200319 |               | -0.676981093 | 0.030272588 |
| 17340332 | Ppp1r21       | 0.590793224  | 0.030278608 |
| 17283131 | Ptpn21        | 0.597462204  | 0.030284916 |
| 17330359 | Pla1a         | -0.538371073 | 0.03028778  |
| 17524677 | Kri1          | 0.443883893  | 0.03029138  |
| 17275772 | Spanxn4       | -0.737479163 | 0.030295903 |
| 17482083 | 1110004F10Rik | 0.384118191  | 0.030296224 |
| 17374514 | 1700054M17Rik | -0.700241659 | 0.030296224 |
| 17248691 | Ebf1          | 1.05087517   | 0.030298126 |
| 17472161 | Wbp11         | 0.400892437  | 0.030298126 |
| 17207719 |               | 0.869830308  | 0.030317411 |
| 17448535 | Yipf7         | -0.562144719 | 0.030331179 |
| 17320928 | Slc38a2       | 0.452013941  | 0.030339129 |
| 17538284 | Nxt2          | 0.518120784  | 0.030350341 |
| 17527353 | Etfa          | 0.427635091  | 0.030353574 |
| 17386297 | Fastkd1       | 0.51374325   | 0.030355539 |
| 17525476 | Gm3867        | -0.573323212 | 0.030355539 |
| 17278834 | Mir376c       | 0.470847053  | 0.030355539 |
| 17208251 |               | -0.71634297  | 0.030355539 |
| 17504661 | D230025D16Rik | 0.529063146  | 0.030389089 |
| 17227722 | 4930590L20Rik | -0.470475798 | 0.030390028 |
| 17548723 | Glce          | 0.802163158  | 0.03042516  |
| 17204455 |               | -0.61479518  | 0.03047032  |
| 17473061 | Dennd5b       | 0.770155404  | 0.030489808 |
| 17525578 | Slc37a2       | -0.784444046 | 0.030499518 |
| 17208247 |               | -1.357603152 | 0.030502269 |
| 17463493 | Klrb1-ps1     | 0.486437318  | 0.030506492 |
| 17370789 | 4930573O16Rik | -0.522514088 | 0.03051569  |
| 17408121 |               | -1.044745936 | 0.030523994 |
| 17404596 | Kcnmb3        | -0.535043195 | 0.030525905 |
| 17412627 | Cnr1          | 0.858422685  | 0.030540278 |
| 17247898 | Fancl         | 0.396591137  | 0.03055404  |
| 17472598 | C2cd5         | 0.569217842  | 0.03056161  |
| 17538812 |               | -1.04401866  | 0.03056161  |
| 17201409 |               | -0.524705336 | 0.030566805 |
| 17514786 | Gm16302       | -0.480884179 | 0.030587818 |
| 17281388 | Fbxo33        | 0.500919105  | 0.03059572  |
| 17474278 | Ceacam5       | -0.637631766 | 0.030601316 |
| 17459332 |               | -0.715952324 | 0.030601316 |
| 17362559 | Incenp        | 0.854903348  | 0.030624259 |
| 17313688 | Samm50        | 0.621684276  | 0.030626072 |

|          |               |              |             |
|----------|---------------|--------------|-------------|
| 17377738 | Defb36        | -0.539434827 | 0.030629449 |
| 17361304 | Lrfn4         | -0.549410987 | 0.030629449 |
| 17539822 | Mir362        | 0.775520147  | 0.030629449 |
| 17466838 | 2700086A05Rik | -0.52016714  | 0.030652108 |
| 17205731 |               | -0.743247862 | 0.030658148 |
| 17311157 | Atp6v1c1      | 0.533398872  | 0.030670094 |
| 17399237 | Ash1l         | -0.537088973 | 0.030689477 |
| 17463358 | Parp11        | 0.450439502  | 0.030689477 |
| 17304240 | Pde12         | 0.543099547  | 0.030689477 |
| 17550534 | ATP8          | -0.538839912 | 0.030692889 |
| 17421150 | 4930455G09Rik | 0.653956985  | 0.030699167 |
| 17219374 | Alyref2       | -0.613987941 | 0.030719751 |
| 17244862 |               | -2.390510867 | 0.030722324 |
| 17543829 | Rlim          | 0.640697034  | 0.030740084 |
| 17238150 | Zbtb39        | 0.782894044  | 0.030743164 |
| 17542139 | 1700111N16Rik | -0.636828126 | 0.030754478 |
| 17540739 | Gm14527       | 0.682256192  | 0.03075747  |
| 17476263 | Zfp260        | 0.666829395  | 0.030766101 |
| 17549912 | LOC100048741  | -0.503445843 | 0.030781008 |
| 17355131 | Mir694        | -0.522671817 | 0.030781008 |
| 17210213 |               | 0.93908567   | 0.030781008 |
| 17489645 | 4931406P16Rik | -0.55987412  | 0.030787649 |
| 17249140 | 3010026O09Rik | 0.445479239  | 0.030810807 |
| 17238669 | Olfr788       | -0.760299258 | 0.030810807 |
| 17378964 | Dhx35         | 0.527693664  | 0.030833454 |
| 17331365 | Arl13b        | 0.372540796  | 0.030844429 |
| 17284382 | LOC100862489  | -0.40292517  | 0.030884468 |
| 17540325 | n-R5s3        | 0.77848333   | 0.030887145 |
| 17388756 | Pdhx          | 0.553593492  | 0.03089796  |
| 17238868 |               | -0.827966242 | 0.03089796  |
| 17251947 | Asgr2         | -0.495765923 | 0.03091543  |
| 17288936 | C130071C03Rik | 0.60226415   | 0.03091543  |
| 17427961 | Cpt2          | 0.393320611  | 0.03091543  |
| 17440775 | Dao           | -0.518249486 | 0.03091543  |
| 17549190 | Defa-rs4      | -0.615361785 | 0.03091543  |
| 17249833 | G3bp1         | 0.503950637  | 0.03091543  |
| 17370330 | Olfr339       | -0.498993867 | 0.03091543  |
| 17387542 | P2rx3         | 0.7113783571 | 0.03091543  |
| 17374765 | Spint1        | 0.677232937  | 0.03091543  |
| 17550659 |               | -0.674112681 | 0.03092076  |
| 17207619 |               | 1.620613895  | 0.030926172 |
| 17200233 |               | 0.551076715  | 0.030931245 |
| 17237094 | Ppfia2        | 0.612474339  | 0.030951607 |

|          |               |              |             |
|----------|---------------|--------------|-------------|
| 17294696 | Rasa1         | 0.39012825   | 0.030960845 |
| 17445067 | Rxfp2         | -0.418729758 | 0.030969349 |
| 17231662 | Fbxo30        | 0.453074958  | 0.030988831 |
| 17435249 | Mir3096       | 0.718772101  | 0.030988831 |
| 17377268 | Plk1s1        | 0.617249511  | 0.030988831 |
| 17474122 | Tmem160       | -0.606075416 | 0.030988831 |
| 17384559 | Olfr341       | -0.739532033 | 0.030999027 |
| 17367963 | Entpd2        | -0.464968396 | 0.031025885 |
| 17429177 | Cdc20         | 0.572306159  | 0.031032896 |
| 17400630 | Rbm8a         | 0.488036741  | 0.031032896 |
| 17376795 | Gm14218       | -0.614990954 | 0.031049946 |
| 17266362 | Rpl23a        | -0.489328161 | 0.031049946 |
| 17396750 | Ndufb5        | 0.372887796  | 0.031054452 |
| 17241810 | Rtdr1         | -0.565259697 | 0.031054452 |
| 17244486 | Socs2         | -0.416105922 | 0.031054452 |
| 17421821 | Ctnnbip1      | 0.574255642  | 0.031068914 |
| 17546070 | Gm15226       | -0.519646081 | 0.031068914 |
| 17525286 |               | -0.64148544  | 0.031068914 |
| 17215067 | Armc9         | -0.427893215 | 0.031069007 |
| 17286882 | Nol7          | 0.628784072  | 0.031069007 |
| 17359902 | Nolc1         | 0.728944904  | 0.031069007 |
| 17516164 | Olfr901       | -1.017579308 | 0.031069007 |
| 17333375 | Smok2a        | -1.116062401 | 0.031069007 |
| 17549144 |               | -0.659111207 | 0.031069007 |
| 17207735 |               | -0.612107538 | 0.031069007 |
| 17510579 |               | 0.829023788  | 0.031069007 |
| 17363497 | C330002G04Rik | -0.473944895 | 0.031085177 |
| 17435825 | Cenpa         | 0.459651202  | 0.031085177 |
| 17346950 | Mir1195       | -0.529286034 | 0.031085177 |
| 17549206 | Mir1195       | -0.529286034 | 0.031085177 |
| 17550080 | Mir1195       | -0.529286034 | 0.031085177 |
| 17455061 | Pdap1         | 0.371700164  | 0.031085177 |
| 17481743 | Wee1          | 0.56140918   | 0.031085177 |
| 17251485 | Aurkb         | 0.544231262  | 0.031095889 |
| 17268647 | Fbxo47        | 0.817106126  | 0.031102532 |
| 17335842 | Pde9a         | 0.625100321  | 0.031104317 |
| 17496713 | 1700008J07Rik | 0.655569021  | 0.031109203 |
| 17334172 | Dcpp2         | -0.699221822 | 0.031116061 |
| 17240840 | Mcm9          | 0.736620468  | 0.031116061 |
| 17207521 |               | 1.207515812  | 0.031133652 |
| 17429234 | Tmem125       | 0.531921978  | 0.031144255 |
| 17244431 | B930071A02    | -0.486435449 | 0.031145502 |
| 17505082 | Prmt7         | 0.553767927  | 0.031151215 |

|          |               |              |             |
|----------|---------------|--------------|-------------|
| 17207515 |               | -0.891860985 | 0.031151215 |
| 17539415 | Rbbp7         | 0.418212366  | 0.031179483 |
| 17550633 |               | -0.900300013 | 0.031191177 |
| 17412932 | Galt          | 0.598046913  | 0.031196494 |
| 17309161 | Fbxl3         | 0.437014886  | 0.031221802 |
| 17267115 | Usp32         | 0.504878968  | 0.031221802 |
| 17414454 |               | -0.407402341 | 0.031221802 |
| 17550170 |               | -0.407402341 | 0.031221802 |
| 17433251 | H6pd          | -0.764244132 | 0.031227565 |
| 17207737 |               | -0.869035251 | 0.031230175 |
| 17548928 | Gm7785        | 0.414633326  | 0.031296262 |
| 17227221 | Ptprv         | -0.618304569 | 0.031299179 |
| 17536950 | 1700018G05Rik | -0.517002475 | 0.031307155 |
| 17427345 | Cyp2j12       | -0.576453192 | 0.031339478 |
| 17457719 |               | -0.395442921 | 0.031352195 |
| 17236882 | Dusp6         | -0.56270557  | 0.03136113  |
| 17222080 | Prss40        | -0.403728089 | 0.03136113  |
| 17220866 | Rd3           | -0.65569009  | 0.031376574 |
| 17314233 | Alg10b        | 0.503198076  | 0.031379125 |
| 17374121 | Ccdc34        | 0.461215989  | 0.031379125 |
| 17441160 | Pla2g1b       | -0.617498677 | 0.031381954 |
| 17456285 | Naa38         | 0.546454094  | 0.031401887 |
| 17207483 |               | -1.064807914 | 0.031446041 |
| 17331767 | Rwdd2b        | 0.425093116  | 0.031448556 |
| 17251840 | Ctdnep1       | -0.434087595 | 0.031451055 |
| 17356141 | Tmem134       | -0.409900516 | 0.031451055 |
| 17210351 |               | 1.748920536  | 0.031451055 |
| 17206463 |               | 1.258665078  | 0.031451055 |
| 17229939 | Fcrl6         | -0.490717065 | 0.031461333 |
| 17253505 | Sdf2          | 0.403995659  | 0.031461333 |
| 17255581 | Hoxb6         | -0.571288793 | 0.031507379 |
| 17265783 | Olfr385       | -0.711200121 | 0.031522784 |
| 17421110 | Agmat         | -0.648949444 | 0.031546761 |
| 17295038 | Scamp1        | 0.44758151   | 0.031546761 |
| 17346522 | Tnfsf14       | -0.548016528 | 0.031581215 |
| 17258642 | Snord1b       | -0.880191826 | 0.031599836 |
| 17201337 |               | -0.722242688 | 0.031618859 |
| 17429298 | Gm12862       | -0.389729754 | 0.031630886 |
| 17546040 | Rab9          | 0.443216485  | 0.031642922 |
| 17513238 |               | -0.931787531 | 0.031651831 |
| 17534671 |               | -0.599278906 | 0.031652964 |
| 17537399 |               | 0.710256847  | 0.031666494 |
| 17524451 | Col5a3        | -0.456458809 | 0.031666929 |

|          |               |              |             |
|----------|---------------|--------------|-------------|
| 17346210 | Ticam1        | -0.470365196 | 0.031666929 |
| 17513479 | Tldc1         | 0.595080965  | 0.031666929 |
| 17437380 | 9230114K14Rik | 0.483485908  | 0.031668129 |
| 17500322 | 4933416M07Rik | -0.368414777 | 0.03168362  |
| 17307231 | Micu2         | 0.494959292  | 0.031689284 |
| 17382013 | Dnajc1        | 0.544789083  | 0.03170107  |
| 17254171 | Slfn1         | -0.596574439 | 0.03170107  |
| 17527166 | Rab39         | -0.455898219 | 0.031709028 |
| 17473650 | Aurkc         | -0.723714637 | 0.031709983 |
| 17463673 | Etv6          | -0.408127014 | 0.031709983 |
| 17331088 | Gm19797       | -0.807898936 | 0.031709983 |
| 17539758 | Mycs          | -0.496375066 | 0.031709983 |
| 17305939 | Olfr728       | -0.505446641 | 0.031709983 |
| 17245729 | Slc26a10      | 0.477706743  | 0.031709983 |
| 17203707 |               | -1.440700254 | 0.031709983 |
| 17550713 |               | -0.753344127 | 0.031709983 |
| 17263160 | Olfr329-ps    | -0.583202849 | 0.03171484  |
| 17390485 | Gm14978       | -0.673280634 | 0.031717798 |
| 17212461 | Col3a1        | -0.949714324 | 0.031748922 |
| 17343143 | Glo1          | 0.53379704   | 0.031748922 |
| 17222429 | Txndc9        | 0.444368172  | 0.031753572 |
| 17384627 | Zbtb26        | 0.735385422  | 0.031753572 |
| 17489713 | Lrp3          | -0.528011223 | 0.031755089 |
| 17203689 |               | -0.713347808 | 0.031761702 |
| 17262621 | Hspa4         | 0.338181296  | 0.031764956 |
| 17341696 |               | 0.59217283   | 0.031764956 |
| 17238900 |               | -0.468838123 | 0.031764956 |
| 17539123 |               | -0.538384979 | 0.031795734 |
| 17445689 | Speer4c       | -0.440614103 | 0.031822136 |
| 17205301 |               | -0.81599596  | 0.031846988 |
| 17341440 | Zfp945        | 0.713071435  | 0.0318534   |
| 17532524 | Slc6a20a      | 0.399927133  | 0.031856019 |
| 17365410 | Cyp17a1       | -0.71973507  | 0.031873015 |
| 17450848 | Tmed11        | -0.432901456 | 0.031887208 |
| 17416576 | 0610037L13Rik | 0.585336415  | 0.031903816 |
| 17475536 | BC024978      | -0.55850449  | 0.031903816 |
| 17419812 | D4Wsu53e      | 0.513572862  | 0.031903816 |
| 17517346 | Gm16124       | -0.654062453 | 0.031903816 |
| 17245700 | Tspan31       | 0.47849163   | 0.031903816 |
| 17448442 |               | -0.35694326  | 0.031903816 |
| 17276251 |               | 1.092772598  | 0.031903816 |
| 17219459 |               | 0.467616217  | 0.031903816 |
| 17205819 |               | 0.745730497  | 0.031903816 |

|          |            |              |             |
|----------|------------|--------------|-------------|
| 17207851 |            | -1.327612076 | 0.031903816 |
| 17424461 | Ccl21a     | -0.396222533 | 0.031911392 |
| 17343873 | Rnf5       | 0.343409545  | 0.031911392 |
| 17431377 | Tmem50a    | 0.371546559  | 0.031911392 |
| 17206337 |            | -1.156919105 | 0.031911392 |
| 17408052 | Terc       | -0.761474096 | 0.031912073 |
| 17228021 |            | -0.660138134 | 0.031932235 |
| 17202219 |            | 1.694393701  | 0.031942332 |
| 17273059 | Gm11772    | 0.604921568  | 0.032000072 |
| 17202667 |            | 0.566480821  | 0.03201093  |
| 17476188 | Zfp30      | 0.708320408  | 0.032011736 |
| 17538836 |            | -0.559213985 | 0.032011736 |
| 17203609 |            | 1.01220023   | 0.032011736 |
| 17480675 | P4ha3      | -0.926468146 | 0.032014702 |
| 17526861 | Dlat       | 0.431852449  | 0.032014875 |
| 17548518 | Gm19692    | 0.350260784  | 0.032036998 |
| 17202225 |            | 0.7758528    | 0.032036998 |
| 17311490 |            | -0.357289442 | 0.032036998 |
| 17401623 |            | -0.542370214 | 0.032048791 |
| 17408054 | BC107364   | 0.355279369  | 0.032052761 |
| 17432912 | Fbxo6      | 0.604647629  | 0.032052761 |
| 17341781 | Ccnf       | 0.698063119  | 0.032056165 |
| 17490924 | Sphk2      | -0.359290165 | 0.032056165 |
| 17356477 | Ap5b1      | -0.461586102 | 0.032076351 |
| 17542066 | Mir742     | -0.595357074 | 0.032077707 |
| 17540050 | Ebp        | 0.49867028   | 0.032119575 |
| 17395108 | Ppp4r1l-ps | 0.459961137  | 0.032119575 |
| 17446536 | Gm16058    | -0.495348451 | 0.032149362 |
| 17421142 | Gm13643    | -0.483641135 | 0.032166646 |
| 17443148 | Cldn3      | 0.500995354  | 0.032175018 |
| 17365692 | Smndc1     | 0.697600266  | 0.032196239 |
| 17521838 | Impdh2     | 0.43687041   | 0.032197692 |
| 17497718 | Ifitm3     | -0.570133821 | 0.032202494 |
| 17292329 | Mirlet7a-1 | -0.738870876 | 0.032203469 |
| 17460918 | Tmem43     | 0.470037796  | 0.032203469 |
| 17208407 |            | -0.884437573 | 0.032210953 |
| 17535175 | Ctag2      | -0.579549233 | 0.032241787 |
| 17344911 | Olfr129    | -0.493698267 | 0.032241787 |
| 17204579 |            | 1.074218116  | 0.032241787 |
| 17207897 |            | 0.825784843  | 0.032241787 |
| 17468067 | Dok1       | -0.60214825  | 0.032247037 |
| 17494453 | Olfr671    | -0.491812622 | 0.0322519   |
| 17463973 | Plekha5    | 0.462548622  | 0.0322519   |



|          |               |              |             |
|----------|---------------|--------------|-------------|
| 17286732 | Tmem14c       | 0.564582232  | 0.0322519   |
| 17300366 |               | 1.034593973  | 0.032253363 |
| 17304596 | Nisch         | -0.394855767 | 0.032255047 |
| 17494087 | Olfr543       | -0.66374023  | 0.032255047 |
| 17532184 | Scn10a        | -0.677562015 | 0.032274347 |
| 17475211 |               | -0.91417032  | 0.032274347 |
| 17342403 | Rhot2         | -0.544530881 | 0.032297557 |
| 17344743 | H2-M10.4      | -0.659214567 | 0.032316628 |
| 17297425 | Fam149b       | 0.482867451  | 0.032318676 |
| 17268180 | Kat7          | 0.623683069  | 0.032318676 |
| 17313016 | Tomm22        | 0.419190706  | 0.032318676 |
| 17538793 |               | -0.499416937 | 0.032332673 |
| 17495598 | Knop1         | 0.356795893  | 0.032351139 |
| 17373781 | Lmo2          | -0.500709906 | 0.032351139 |
| 17529058 | Gm17324       | -0.638019198 | 0.032360118 |
| 17490953 |               | -0.493612168 | 0.032360118 |
| 17459801 | Gcfc2         | 0.513083231  | 0.032363243 |
| 17208855 |               | -0.588642086 | 0.032363243 |
| 17322536 | Vasn          | -0.440184472 | 0.032381896 |
| 17268227 | Abi3          | -0.479904004 | 0.032401909 |
| 17549162 |               | -0.65088668  | 0.032401909 |
| 17325736 | 2610015P09Rik | 0.457727725  | 0.0324035   |
| 17208625 |               | -0.691311085 | 0.032414409 |
| 17463377 | Efcab4b       | -0.616484355 | 0.032415317 |
| 17514093 | Ttc13         | 0.557880599  | 0.032453789 |
| 17392690 | Acss1         | -0.871872993 | 0.032465319 |
| 17548068 | Matr3         | 1.01536448   | 0.032514067 |
| 17490502 | Prmt1         | 0.561005691  | 0.032526172 |
| 17274637 | Rnaseh1       | 0.419807139  | 0.032526829 |
| 17470764 | Gm5077        | -0.789170941 | 0.032531138 |
| 17207451 |               | 0.688760861  | 0.032533666 |
| 17497414 | Mapk1ip1      | 0.65945976   | 0.03254362  |
| 17461942 | Pparg         | 0.725055844  | 0.03254362  |
| 17287185 | Nol8          | 0.670246784  | 0.032543938 |
| 17507094 | Xab2          | 0.510127825  | 0.032543938 |
| 17258210 | 4933422H20Rik | -0.469089124 | 0.032551731 |
| 17355280 |               | -0.54903323  | 0.032573172 |
| 17529492 |               | -0.475868134 | 0.032585529 |
| 17363533 | Mamdc2        | 0.651132715  | 0.032590457 |
| 17201581 |               | -1.038290192 | 0.0325936   |
| 17203759 |               | -0.638648965 | 0.032598961 |
| 17357969 | E030024N20Rik | -0.580466822 | 0.03261464  |
| 17346001 | Mrps36-ps1    | 0.604993978  | 0.03261464  |

|          |               |              |             |
|----------|---------------|--------------|-------------|
| 17452552 | Rhof          | 0.484266457  | 0.03261464  |
| 17291193 |               | -0.752242389 | 0.03261464  |
| 17317858 | Ptk2          | 0.495287261  | 0.032617662 |
| 17436558 | Gm21446       | -0.725251602 | 0.032626804 |
| 17547943 | Etv5          | -0.496889457 | 0.032641422 |
| 17256440 | Stat5a        | -0.397349552 | 0.032641422 |
| 17405021 | Sclt1         | 0.479780168  | 0.032664972 |
| 17416811 | Mir761        | -0.672687931 | 0.032679389 |
| 17400806 |               | 1.187473083  | 0.032681738 |
| 17314157 | Klhdc7b       | -0.476294955 | 0.032693464 |
| 17495665 |               | -0.625500696 | 0.032693464 |
| 17427650 | BB031773      | -0.738476568 | 0.032697209 |
| 17308471 |               | 1.488488939  | 0.032710852 |
| 17318176 | Gsdmd         | -0.425449937 | 0.032713672 |
| 17497113 | Fam53b        | -0.409416795 | 0.032719875 |
| 17345230 | Gm7325        | -0.669654086 | 0.032731129 |
| 17254681 | Trim37        | 0.646269927  | 0.032737982 |
| 17402756 | Ppa2          | 0.540197007  | 0.032751525 |
| 17219902 | 1700016C15Rik | -0.481213077 | 0.032762313 |
| 17442006 | Gm15637       | -0.46887791  | 0.032762313 |
| 17427331 | Cyp2j13       | -0.477223925 | 0.032769618 |
| 17261963 | Fabp6         | -0.661055537 | 0.032769618 |
| 17347267 | Fez2          | 0.41581686   | 0.032769618 |
| 17359672 | Gm10768       | -0.476730265 | 0.032769618 |
| 17326944 | Gm7735        | -0.367820604 | 0.032769618 |
| 17376977 | Snrpb2        | 0.46099402   | 0.032769618 |
| 17294734 |               | 0.763682343  | 0.032769618 |
| 17441130 | Triap1        | 0.456559354  | 0.032787906 |
| 17419097 | Bai2          | -0.63140709  | 0.032810281 |
| 17201693 |               | -0.745736204 | 0.032846889 |
| 17319134 | Sox10         | -0.481729043 | 0.032846975 |
| 17321326 | Arf3          | -0.395140488 | 0.032858745 |
| 17423741 | BC024582      | -0.463209834 | 0.032858745 |
| 17459453 | Foxi3         | 0.364590732  | 0.032858745 |
| 17282956 | Gm7104        | -0.66286411  | 0.032858745 |
| 17254962 | Mrps23        | 0.471770859  | 0.032858745 |
| 17227764 | Rgs2          | 0.570773923  | 0.032858745 |
| 17218044 | Fam5c         | 0.440336209  | 0.032863031 |
| 17361683 | Sipa1         | -0.644012746 | 0.032863031 |
| 17217830 | Gm16880       | -0.661094569 | 0.032879278 |
| 17499335 | Tmem255b      | -0.510398933 | 0.032905142 |
| 17549156 |               | -0.891674133 | 0.03292277  |
| 17500380 | Dusp26        | 0.482292303  | 0.032923569 |

|          |               |              |             |
|----------|---------------|--------------|-------------|
| 17538850 | n-R5s14       | -1.453201773 | 0.032949295 |
| 17492947 | 9930013L23Rik | -0.821632734 | 0.032960237 |
| 17494240 | Hbb-bh1       | -1.135880838 | 0.032960237 |
| 17550629 |               | -0.950246721 | 0.032960237 |
| 17378311 |               | 1.20878379   | 0.032960237 |
| 17508168 |               | -0.740266004 | 0.032961059 |
| 17344334 | Gm20527       | -0.516043193 | 0.032963869 |
| 17504878 | Rltpr         | -0.414678769 | 0.032963869 |
| 17348126 | Mtpap         | 0.623281432  | 0.032967226 |
| 17255210 | Tob1          | 0.409339188  | 0.032967226 |
| 17538429 | Mir764        | -0.494873759 | 0.032968097 |
| 17342699 | Ip6k3         | -0.625201014 | 0.03296811  |
| 17422722 | Aurkaip1      | 0.507516999  | 0.032968216 |
| 17258555 | Cdk3-ps       | -0.52963831  | 0.032968216 |
| 17224540 | Tuba4a        | 0.707239616  | 0.032968216 |
| 17203813 |               | 1.180631072  | 0.032977256 |
| 17426926 | Gm12414       | -0.48409798  | 0.032992814 |
| 17495097 | Lyve1         | -0.390225603 | 0.032994792 |
| 17375935 | Acox1         | -0.418057864 | 0.033012346 |
| 17492598 | Furin         | -0.506688321 | 0.033012346 |
| 17466863 | Hoxa9         | -0.439592113 | 0.033012346 |
| 17544734 | Bex1          | 0.892857623  | 0.03301315  |
| 17314619 | Olfr282       | -0.463299754 | 0.033016371 |
| 17232358 | Ptprk         | 0.667133992  | 0.033016371 |
| 17317203 | Derl1         | 0.431922083  | 0.033033883 |
| 17515680 | Gm15520       | -0.49280798  | 0.033033883 |
| 17234647 | Itgb2         | -0.899059476 | 0.033033883 |
| 17236490 | Tmpo          | 0.548733906  | 0.033033883 |
| 17539768 | Nudt10        | 1.055961471  | 0.033039407 |
| 17428702 | Mmachc        | 0.556512101  | 0.033053884 |
| 17481066 | Pgap2         | 0.423091825  | 0.033053884 |
| 17299808 | Trav6d-5      | -0.578438707 | 0.033053884 |
| 17372284 | Gm14461       | -0.584107283 | 0.03306252  |
| 17374304 | Aven          | -0.451333365 | 0.033063252 |
| 17381937 | Gm13322       | -0.546681584 | 0.033063252 |
| 17307690 | Gm17116       | -0.71054488  | 0.033063252 |
| 17349243 | Map3k2        | 0.473823864  | 0.033063252 |
| 17396892 | Atp11b        | 0.457933709  | 0.033064233 |
| 17448103 | Gm17182       | -0.523436127 | 0.033064233 |
| 17514379 | Cwf19l2       | 0.48247352   | 0.033085388 |
| 17452194 | Erp29         | 0.425736896  | 0.033085388 |
| 17395830 | Gmeb2         | 0.513394792  | 0.033085388 |
| 17545885 | Syap1         | 0.367568678  | 0.033085388 |

|          |               |              |             |
|----------|---------------|--------------|-------------|
| 17248123 |               | -0.818173819 | 0.033085388 |
| 17357228 |               | 0.793731469  | 0.033085388 |
| 17259443 | 4732444A12Rik | -0.446099213 | 0.033104616 |
| 17520851 | Anapc13       | -0.428296166 | 0.033104638 |
| 17238830 |               | -0.868643441 | 0.033104638 |
| 17394153 | Sipi          | -0.580161214 | 0.033146869 |
| 17205955 |               | 0.757220589  | 0.033153459 |
| 17549960 |               | -0.550325646 | 0.033153814 |
| 17479769 | Adamtsl3      | -0.488976568 | 0.033170088 |
| 17217777 | Ddx59         | 0.554206679  | 0.033170373 |
| 17451437 | Selplg        | -0.760423244 | 0.033170373 |
| 17405834 |               | -0.597016988 | 0.033174934 |
| 17351143 | Sh3tc2        | 0.70264221   | 0.033176843 |
| 17241962 | Mif           | -0.423821448 | 0.03317886  |
| 17400545 | Hist2h2aa1    | 0.340991288  | 0.033196429 |
| 17408017 | Hist2h2aa1    | 0.340991288  | 0.033196429 |
| 17526583 | Sidt2         | -0.388121337 | 0.033196429 |
| 17200591 |               | 1.103654123  | 0.033196429 |
| 17200531 |               | 0.45113467   | 0.033197925 |
| 17256942 | Rundc3a       | 0.45051683   | 0.033223067 |
| 17421030 | Gm13056       | 0.618629068  | 0.033226232 |
| 17463316 | D6Wsu163e     | 0.38825841   | 0.033227001 |
| 17475801 | Eid2          | 0.78190095   | 0.033227001 |
| 17294805 | Zcchc9        | 0.50219923   | 0.033227001 |
| 17210847 |               | -1.131968502 | 0.033227001 |
| 17257235 | Itgb3         | -0.735805904 | 0.033232412 |
| 17393579 | Sla2          | -0.569910011 | 0.033232412 |
| 17203741 |               | -0.973919395 | 0.033232412 |
| 17346007 | Sult1c1       | -0.500361023 | 0.033237686 |
| 17538974 | Usp51         | -0.727383333 | 0.033241929 |
| 17341707 |               | 0.677106655  | 0.033272121 |
| 17231431 | 1700052N19Rik | 0.349879086  | 0.033286382 |
| 17319429 | Mkl1          | -0.473473381 | 0.033286382 |
| 17232353 |               | -0.448450199 | 0.033286382 |
| 17334956 | Crebrf        | 0.604269321  | 0.033317534 |
| 17221238 |               | 0.678523182  | 0.033317534 |
| 17479168 | LOC100505025  | -0.680299662 | 0.033340843 |
| 17495106 | Mrv1          | -0.666717617 | 0.033378896 |
| 17474385 | Nanos2        | -0.598388982 | 0.033378896 |
| 17270269 | Gpatch8       | 0.636957533  | 0.033393765 |
| 17253688 | Ift20         | 0.349676304  | 0.033399859 |
| 17200389 |               | 0.827355731  | 0.033408933 |
| 17500644 | Micu3         | 0.907904152  | 0.03344562  |

|          |               |              |             |
|----------|---------------|--------------|-------------|
| 17393554 | Gm14174       | -1.254222607 | 0.033471901 |
| 17414108 |               | -0.433110397 | 0.033478918 |
| 17381892 | Ptpla         | -0.375568302 | 0.033483906 |
| 17279881 | Ubxn2a        | 0.357331504  | 0.033507627 |
| 17545045 | Kcne1l        | -0.397952526 | 0.033522826 |
| 17433975 | Mir200b       | 0.764387501  | 0.033523912 |
| 17259763 | Limk2         | 0.529829933  | 0.033527601 |
| 17400862 | Hmgcs2        | 0.633079794  | 0.033527922 |
| 17232172 | Taar1         | -0.420159768 | 0.033527922 |
| 17268572 | E130012A19Rik | 0.723813631  | 0.03353559  |
| 17521825 | Qrich1        | 0.378368596  | 0.03354574  |
| 17494559 | Arfip2        | 0.647926297  | 0.033547065 |
| 17210761 |               | -0.896420281 | 0.033589572 |
| 17215309 | Inpp5d        | -1.145122906 | 0.033602003 |
| 17321215 | Olfr284       | -0.589274786 | 0.033604964 |
| 17204675 |               | 1.163977216  | 0.033606181 |
| 17351811 | Acaa2         | 0.502795405  | 0.033614802 |
| 17205015 |               | 1.072323042  | 0.033614802 |
| 17439893 | Gm8258        | -0.748935268 | 0.033631094 |
| 17461045 | A730049H05Rik | 0.720516076  | 0.033659622 |
| 17498786 | Lrrc8e        | -0.413151691 | 0.033659622 |
| 17225595 | Otos          | -0.514542457 | 0.033659622 |
| 17490878 | Ppp1r15a      | 0.466312893  | 0.033659622 |
| 17250710 | Trpv2         | -0.577097143 | 0.033659622 |
| 17209801 |               | 1.07586774   | 0.033659622 |
| 17338612 | 4930571B16Rik | -0.546252813 | 0.033668784 |
| 17410105 | 1700003H04Rik | -0.499847833 | 0.033670908 |
| 17339585 | Spast         | 0.52721895   | 0.033714074 |
| 17531709 | Mlh1          | 0.404476855  | 0.03371476  |
| 17359929 |               | 0.742970295  | 0.03371476  |
| 17411201 | Nexn          | -0.601486911 | 0.033725196 |
| 17346231 | Ptprs         | -0.644475083 | 0.033725196 |
| 17549948 |               | -0.41166756  | 0.033725196 |
| 17448750 |               | 1.579717022  | 0.033725196 |
| 17284060 | 4930595D18Rik | -0.446234831 | 0.033749401 |
| 17236705 | Gm16155       | -0.590417037 | 0.033749401 |
| 17329403 | Masp1         | -0.862954344 | 0.033749401 |
| 17387276 | Pde1a         | 0.326502189  | 0.033749401 |
| 17389736 | Ankrd63       | -0.550395474 | 0.033760429 |
| 17233237 | Rfx6          | 1.039092993  | 0.033760429 |
| 17449632 |               | 0.691702832  | 0.033760429 |
| 17211857 | 4933424G06Rik | -0.432095687 | 0.033764495 |
| 17206553 |               | 1.488420726  | 0.033764495 |

|          |               |              |             |
|----------|---------------|--------------|-------------|
| 17236016 |               | -0.870816204 | 0.033764495 |
| 17468138 | Gm15624       | -0.509008397 | 0.033799268 |
| 17269748 | Ptrf          | -0.575777522 | 0.033799268 |
| 17286553 | Cdyl          | 0.464771232  | 0.033834791 |
| 17408074 | Polr3gl       | 0.674343141  | 0.033836319 |
| 17286682 | Bmp6          | 0.722977017  | 0.033848817 |
| 17410718 | Pdha2         | -0.402351985 | 0.033852521 |
| 17449103 | 1700031L13Rik | -0.465438028 | 0.033859781 |
| 17457047 | Gm13851       | -0.486868641 | 0.033859781 |
| 17540144 | Gm14499       | -0.486468081 | 0.033859781 |
| 17330614 | Slc35a5       | 0.601290308  | 0.033859781 |
| 17360537 | Habp2         | 1.022481565  | 0.033872848 |
| 17220921 | A130010J15Rik | 0.68117285   | 0.033874113 |
| 17379110 | Gm14241       | -0.631100724 | 0.033888287 |
| 17515886 | Srpr          | 0.464143482  | 0.033889374 |
| 17449546 |               | -0.570895648 | 0.033889374 |
| 17348238 | Rab18         | 0.43364355   | 0.033893547 |
| 17377420 | Gm14135       | -0.362398393 | 0.033899081 |
| 17334158 | Prss21        | -0.340658762 | 0.03390371  |
| 17425280 | C630028M04Rik | -0.40748691  | 0.033929479 |
| 17397426 | Ccrn4l        | 0.60187241   | 0.033981485 |
| 17338738 | A230051N06Rik | -0.553513652 | 0.033984766 |
| 17408184 | Chd1l         | 0.646813215  | 0.033989095 |
| 17208577 |               | -1.03033952  | 0.033989095 |
| 17504587 | Ces2h         | -0.531100751 | 0.033990442 |
| 17331796 |               | 0.655773464  | 0.034008679 |
| 17280254 | Gm5433        | 0.58628683   | 0.034009309 |
| 17270829 | Gh            | -0.472938103 | 0.034058769 |
| 17467232 | Gprin3        | -0.433489854 | 0.034107919 |
| 17502992 |               | -0.58768079  | 0.03411541  |
| 17384578 | Pdcl          | 0.600112389  | 0.034126563 |
| 17467278 | Gm7144        | -0.472760634 | 0.034143243 |
| 17325533 | Lrrc58        | -0.375071026 | 0.034143243 |
| 17309020 |               | -0.6262817   | 0.034143243 |
| 17263185 | Olfr323       | -0.491902178 | 0.034190408 |
| 17507682 | Erich1        | 0.524182717  | 0.034197356 |
| 17452430 | Ift81         | 0.485976705  | 0.034231476 |
| 17483889 |               | -0.966361775 | 0.034231476 |
| 17550258 |               | -0.966361775 | 0.034231476 |
| 17210815 |               | -1.188021989 | 0.034238553 |
| 17312089 | Chrac1        | 0.347356016  | 0.034265049 |
| 17281721 | Pygl          | -0.644635069 | 0.034265049 |
| 17207997 |               | 1.317583508  | 0.034265049 |

|          |               |              |             |
|----------|---------------|--------------|-------------|
| 17200865 |               | -0.792732528 | 0.034277648 |
| 17400437 | Aph1a         | -0.427570307 | 0.034282035 |
| 17377475 | E130215H24Rik | -0.60780257  | 0.034282035 |
| 17296905 | Gm2237        | 0.56420077   | 0.034282035 |
| 17320556 | Rabl2         | 0.607325915  | 0.034282035 |
| 17333380 | Smok2b        | -0.515829331 | 0.034282035 |
| 17243018 |               | -0.610241284 | 0.034282035 |
| 17418589 | Gm12945       | -0.355836137 | 0.034308732 |
| 17357538 |               | 0.690159385  | 0.034314254 |
| 17210361 |               | 0.717763003  | 0.034314254 |
| 17486505 |               | -0.767049713 | 0.034314254 |
| 17373028 | Fnbp4         | 0.404532789  | 0.034329299 |
| 17268755 | Med1          | 0.505523155  | 0.034329299 |
| 17208629 |               | 1.130459892  | 0.034329299 |
| 17314773 | 1700120C14Rik | -0.657743481 | 0.034340165 |
| 17471213 | 9630033F20Rik | 0.342392184  | 0.034387571 |
| 17331254 | Olfr194       | -0.59088438  | 0.034387571 |
| 17204301 |               | 0.62217266   | 0.034387571 |
| 17516837 | Bace1         | -0.467194191 | 0.034409737 |
| 17421517 | Gm16503       | -0.502950063 | 0.034409737 |
| 17337919 | Tcte1         | -0.489424792 | 0.034409737 |
| 17467286 |               | -0.819743326 | 0.034409737 |
| 17545817 | Gm15205       | -0.427539967 | 0.034430921 |
| 17315198 | Mir1941       | -0.747790187 | 0.034443528 |
| 17536436 | Ar            | -0.341420072 | 0.034462418 |
| 17271719 | Cd300c        | -0.432479367 | 0.03448113  |
| 17305636 | Ero1l         | 0.453671859  | 0.03448113  |
| 17252272 | Mis12         | 0.804863023  | 0.03448113  |
| 17514615 | 1700128F08Rik | -0.37252711  | 0.034486194 |
| 17434555 | Abcb1b        | 0.92534411   | 0.034486194 |
| 17352020 | Atp5a1        | 0.384054662  | 0.034486194 |
| 17452978 | Ubc           | -0.456087184 | 0.034486194 |
| 17292698 | 4833439L19Rik | 0.378073654  | 0.034511705 |
| 17221553 | Pkhd1         | -0.343708448 | 0.034511705 |
| 17519509 | Leo1          | 0.514940432  | 0.034542123 |
| 17371254 | Csrnp3        | 0.820111896  | 0.034543585 |
| 17428228 | Elavl4        | 0.518839132  | 0.034543585 |
| 17201509 |               | -0.582095425 | 0.034562482 |
| 17252712 | Zfp735        | -0.580308403 | 0.034567064 |
| 17244057 | Gas2l3        | 0.621557571  | 0.034572696 |
| 17466488 | Tpk1          | 0.718720718  | 0.034578774 |
| 17332358 | Erg           | -0.688735592 | 0.034591894 |
| 17339824 | Vit           | 0.647091758  | 0.034591894 |

|          |               |              |             |
|----------|---------------|--------------|-------------|
| 17389855 | Gm14207       | -0.449009782 | 0.034593344 |
| 17277786 |               | -0.779023696 | 0.034598964 |
| 17453030 | Slc15a4       | 0.525929834  | 0.034600049 |
| 17356447 | Efemp2        | -0.358806628 | 0.034617225 |
| 17485937 | Ube2s         | 0.441341515  | 0.034617225 |
| 17205223 |               | 0.729985589  | 0.034617225 |
| 17209413 |               | 0.729985589  | 0.034617225 |
| 17468195 | Stambp        | 0.382761756  | 0.034633396 |
| 17414836 | Tlr4          | -0.806857426 | 0.034633396 |
| 17267420 | Ypel2         | 0.687156238  | 0.034635435 |
| 17425703 | Gm12580       | -0.554200343 | 0.034647198 |
| 17271920 | Hn1           | 0.481495203  | 0.034670664 |
| 17418094 | 9530002B09Rik | -0.566134493 | 0.034692525 |
| 17204909 |               | -0.841437231 | 0.034692525 |
| 17311131 | 4930447A16Rik | -0.525697142 | 0.03469733  |
| 17377675 | Csnk2a1       | 0.35600976   | 0.03469733  |
| 17551165 |               | -0.797312351 | 0.03469733  |
| 17535098 | F9            | -0.425144624 | 0.034700491 |
| 17209951 |               | -0.938572186 | 0.034721604 |
| 17479804 | Eftud1        | 0.675512806  | 0.034723126 |
| 17201713 |               | 1.19017805   | 0.034723126 |
| 17201889 |               | 1.19017805   | 0.034723126 |
| 17415542 |               | -0.700242668 | 0.034723126 |
| 17527787 | Arih1         | 0.326153745  | 0.034762921 |
| 17248421 | Gm12711       | -0.343452098 | 0.034762921 |
| 17400803 |               | 0.437908473  | 0.034810721 |
| 17395029 | Gm14455       | -0.596964112 | 0.034813567 |
| 17495932 | Palb2         | 0.408759283  | 0.034813567 |
| 17455006 | Smurf1        | 0.49566507   | 0.034813567 |
| 17295177 | Sv2c          | 0.497534152  | 0.034813567 |
| 17207745 |               | 1.483292253  | 0.034813567 |
| 17204917 |               | 1.543406193  | 0.034823478 |
| 17482739 | Plk1          | 0.594492479  | 0.034868662 |
| 17206401 |               | 1.293659887  | 0.034869215 |
| 17205483 |               | 0.839776266  | 0.03488093  |
| 17449989 | Rasgef1b      | 1.19382878   | 0.034885537 |
| 17547965 | Cbr1          | 0.552021099  | 0.034899225 |
| 17453106 | Zfp11         | 0.577652538  | 0.034899225 |
| 17425271 | Ppp3r2        | -0.419751226 | 0.034909085 |
| 17537630 | Mir3112       | 0.610610892  | 0.034909525 |
| 17371460 | Ppig          | 0.426362122  | 0.034909812 |
| 17548675 | 4930412F12Rik | -0.400272059 | 0.034929296 |
| 17353731 | E230025N22Rik | -0.658599248 | 0.034929296 |



|          |               |              |             |
|----------|---------------|--------------|-------------|
| 17365861 | Gm6990        | -0.367765983 | 0.034929296 |
| 17402746 | Ints12        | 0.534320276  | 0.034929296 |
| 17421174 | Lrrc38        | 0.371938398  | 0.034929296 |
| 17549670 | Mfn2          | -0.418177844 | 0.034929296 |
| 17218907 | Nme7          | 0.537877074  | 0.034929296 |
| 17328640 | Ube2l3        | -0.345505573 | 0.034929296 |
| 17474759 | Vmn1r100      | -0.342060401 | 0.034929296 |
| 17474774 | Vmn1r100      | -0.342060401 | 0.034929296 |
| 17474807 | Vmn1r100      | -0.342060401 | 0.034929296 |
| 17548010 |               | -0.611734506 | 0.034929296 |
| 17522550 | Gm10030       | -0.549673103 | 0.034980925 |
| 17539828 | Usp27x        | 0.695742007  | 0.034996578 |
| 17269911 | Vat1          | -0.434496054 | 0.034996578 |
| 17469259 | Suclg2        | 0.54630577   | 0.034999869 |
| 17323999 | Mir1224       | -0.821837296 | 0.035001303 |
| 17278704 | 6430411K18Rik | 0.619477718  | 0.035013756 |
| 17325648 | Gm15802       | -0.619573718 | 0.035021992 |
| 17440707 | Gm6588        | -0.717065841 | 0.035021992 |
| 17283543 |               | 0.443588362  | 0.035021992 |
| 17354361 |               | 0.372835765  | 0.035021992 |
| 17290934 |               | 0.893822035  | 0.035028128 |
| 17305012 | Gprin2        | -0.377836153 | 0.035041058 |
| 17252165 | Gp1ba         | -0.526475964 | 0.035070586 |
| 17365721 | Bbip1         | 0.413962428  | 0.035098252 |
| 17524411 | Zfp266        | 0.518058136  | 0.035114249 |
| 17535123 | Gm14662       | -0.818052711 | 0.035133172 |
| 17486748 | Obox3         | -0.784639005 | 0.035134439 |
| 17382937 | Snpc4         | 0.497839124  | 0.035142351 |
| 17323183 | A630010A05Rik | -0.426837072 | 0.035146996 |
| 17343755 | H2-Pb         | -0.535856523 | 0.035181108 |
| 17518680 | Dapk2         | -0.492725416 | 0.035184312 |
| 17358764 | Lipm          | 0.480393056  | 0.035233346 |
| 17436823 | Adra2c        | -0.427387273 | 0.035242221 |
| 17353976 | Gm15336       | -0.632294008 | 0.035246423 |
| 17203101 |               | 0.989393934  | 0.035249314 |
| 17497146 | 1500002F19Rik | -0.43311933  | 0.035249634 |
| 17431234 | Cnksr1        | 0.439982079  | 0.035252837 |
| 17535480 | DXBay18       | 0.511053474  | 0.035252837 |
| 17203081 |               | 1.467901191  | 0.035263575 |
| 17443818 | Lamtor4       | -0.346874674 | 0.03526827  |
| 17389928 | Ndufaf1       | 0.483215476  | 0.03526827  |
| 17550474 | A130040M12Rik | -1.239260961 | 0.035293294 |
| 17466618 | LOC100862539  | -0.497372308 | 0.035313882 |

|          |               |              |             |
|----------|---------------|--------------|-------------|
| 17243247 | Mrpl54        | 0.667802411  | 0.035316284 |
| 17317835 | Peg13         | 0.478759252  | 0.035316284 |
| 17209835 |               | -1.376531059 | 0.035316284 |
| 17547016 |               | -0.464550609 | 0.035316284 |
| 17212750 | Stat1         | 0.600459223  | 0.035345535 |
| 17262783 | Slc22a4       | -0.542519454 | 0.035357746 |
| 17433023 | Cort          | -0.560449904 | 0.035358467 |
| 17334040 | Vmn2r-ps129   | -0.424314836 | 0.035358835 |
| 17418211 |               | -0.747984639 | 0.035358835 |
| 17241731 | Bicc1         | -1.023020368 | 0.035391649 |
| 17419416 |               | -0.448724572 | 0.035391649 |
| 17461157 |               | -0.582117917 | 0.035391649 |
| 17493298 | Tmem126b      | 0.621152312  | 0.035431482 |
| 17470510 | LOC101055658  | -0.388162728 | 0.035439456 |
| 17381903 | 4921530L18Rik | 0.520882828  | 0.03544211  |
| 17362973 | Ms4a6d        | -1.073316911 | 0.035472101 |
| 17367750 | Wdr85         | 0.581834407  | 0.035472101 |
| 17206993 |               | -1.172979421 | 0.035472101 |
| 17550845 |               | -0.522470926 | 0.035473289 |
| 17236620 | Gm15963       | 0.743107817  | 0.035477653 |
| 17373670 | Gm13920       | -0.465461042 | 0.035490501 |
| 17211990 | Lipt1         | 0.538226432  | 0.035490914 |
| 17203401 |               | 1.361491144  | 0.035492186 |
| 17204241 |               | 0.686081331  | 0.035494822 |
| 17530496 | Pik3r4        | 0.626605305  | 0.035509308 |
| 17495692 | Dcun1d3       | 0.547880398  | 0.035512141 |
| 17288854 | Pou5f2        | -0.786899751 | 0.035514384 |
| 17405722 |               | -0.855864942 | 0.035514384 |
| 17535808 | Gdi1          | 0.405720988  | 0.035515678 |
| 17284327 | Ighm          | -0.617930531 | 0.035515678 |
| 17318350 | Plec          | -0.492587041 | 0.035515678 |
| 17546410 |               | -0.398920999 | 0.035520176 |
| 17467831 | Tmsb10        | -0.438213935 | 0.035536943 |
| 17425151 | Alg2          | 0.593172277  | 0.035540404 |
| 17211572 | Rab23         | 0.401492678  | 0.035580907 |
| 17209591 |               | -0.814449596 | 0.035580907 |
| 17242726 | Gm17134       | -0.476951593 | 0.035584405 |
| 17532564 | Xcr1          | -0.584919872 | 0.035584405 |
| 17387672 | Olfr1058      | -0.783591949 | 0.035593766 |
| 17273714 | Adcy3         | -0.74179158  | 0.035619702 |
| 17359994 | Fbxl15        | -0.404027852 | 0.035619702 |
| 17296286 | Gzma          | -0.583711166 | 0.035619702 |
| 17297211 | Il3ra         | -0.474933556 | 0.03562021  |

|          |               |              |             |
|----------|---------------|--------------|-------------|
| 17284564 |               | -0.531107855 | 0.03562021  |
| 17511142 | Nfix          | -0.770136098 | 0.035631043 |
| 17548287 | Oaz2          | 0.50045975   | 0.035631043 |
| 17288888 | 9330111N05Rik | -0.565459435 | 0.035636389 |
| 17276040 | Actr10        | 0.446524415  | 0.035641246 |
| 17458960 | Vmn1r20       | -1.191806346 | 0.035641246 |
| 17243015 |               | -1.021502348 | 0.035641246 |
| 17456991 | Gm13844       | -0.459192948 | 0.035648253 |
| 17288079 |               | 0.636813312  | 0.035648253 |
| 17228804 | Dars2         | 0.573472483  | 0.035681864 |
| 17265912 | Hic1          | -0.497363168 | 0.03569175  |
| 17331774 | Cct8          | 0.355920887  | 0.035708093 |
| 17422006 | Gm13090       | -0.620753468 | 0.035708093 |
| 17239493 | Heca          | 0.382797102  | 0.035718227 |
| 17223982 | Gm16076       | -0.531148137 | 0.035723047 |
| 17266659 | Crlf3         | 0.520356964  | 0.03573007  |
| 17230223 | Mir350        | -0.5357256   | 0.035754448 |
| 17403848 | Zranb2        | 0.597959423  | 0.03577475  |
| 17332181 | Cryz1         | 0.402567496  | 0.035776131 |
| 17355619 | Adnp2         | 0.676433733  | 0.035800835 |
| 17292536 | 4930518P08Rik | -0.526947613 | 0.035801595 |
| 17263463 | Flcn          | 0.457569753  | 0.035807879 |
| 17256924 | Asb16         | -0.449858093 | 0.035821016 |
| 17408793 | Capza1        | 0.395775323  | 0.035832004 |
| 17349627 | Pura          | -0.427803594 | 0.035832004 |
| 17341412 | Zfp944        | 0.938464534  | 0.035832192 |
| 17280552 | Bcap29        | 0.567524275  | 0.035839333 |
| 17512688 | Gm16208       | -0.676220365 | 0.035844427 |
| 17524206 | Scarna9       | 0.904222232  | 0.035844427 |
| 17377989 | Mapre1        | 0.437644356  | 0.03584703  |
| 17503068 | Rfx1          | -0.319227029 | 0.03584703  |
| 17415109 | Sh3gl2        | 0.410245425  | 0.035853528 |
| 17490078 | Gm5595        | 0.796080942  | 0.035860909 |
| 17200289 |               | -1.391045459 | 0.035877503 |
| 17301061 | Mipep         | 0.582415928  | 0.035897202 |
| 17531749 | n-R5s90       | -0.707837094 | 0.035897202 |
| 17268093 | Gm11544       | -0.696635882 | 0.035914569 |
| 17261033 |               | 0.921972145  | 0.035925762 |
| 17285746 | Hist1h2bn     | 1.359345398  | 0.035930137 |
| 17447646 | Slc2a9        | -0.436068586 | 0.035938263 |
| 17548008 |               | -0.558844488 | 0.035980766 |
| 17296962 | D830030K20Rik | 0.737030606  | 0.035982636 |
| 17296989 | D830030K20Rik | 0.737030606  | 0.035982636 |

|          |           |              |             |
|----------|-----------|--------------|-------------|
| 17362330 | Rtn3      | 0.346539323  | 0.036042453 |
| 17391544 | Ckap2l    | 0.495331184  | 0.036059588 |
| 17291671 | Gm19818   | -0.37866032  | 0.036066097 |
| 17303024 | Gm3500    | 1.069589106  | 0.036066097 |
| 17283634 | Serpina1c | -0.797014752 | 0.036066097 |
| 17269434 | Gm14206   | -0.355693779 | 0.036068822 |
| 17520976 | Tmem108   | -1.01204103  | 0.036068822 |
| 17463454 | Clec2i    | -0.701286382 | 0.036075018 |
| 17483546 | Fus       | 0.341665354  | 0.036094333 |
| 17407335 |           | 0.351317911  | 0.036124369 |
| 17238922 |           | -0.554298632 | 0.036132821 |
| 17433231 | Gm13073   | -0.556492335 | 0.036155784 |
| 17213428 | Cyp20a1   | 0.535832127  | 0.036175762 |
| 17424928 | Tomm5     | 0.7414136    | 0.036175762 |
| 17340570 |           | -0.546781369 | 0.036176518 |
| 17549210 | Mir1895   | -0.635030105 | 0.036178598 |
| 17473166 | Cacng6    | -0.456022064 | 0.036187179 |
| 17242322 | Gm9507    | -0.671814459 | 0.036189928 |
| 17206883 |           | 0.844272231  | 0.036189928 |
| 17203443 |           | -0.830160829 | 0.036209169 |
| 17450034 | Hnrpd1    | 0.376182875  | 0.036214728 |
| 17444398 | Eif2ak1   | 0.543019315  | 0.036218047 |
| 17549118 |           | -0.481779647 | 0.036252333 |
| 17278860 | Mirg      | 0.71742598   | 0.036264935 |
| 17312229 | Ly6f      | -0.590170448 | 0.036326325 |
| 17429206 | Tie1      | -0.76295501  | 0.036326325 |
| 17207287 |           | 2.033989885  | 0.036326326 |
| 17201495 |           | -0.719122815 | 0.036326326 |
| 17265379 | Gm12320   | -0.585162382 | 0.036349283 |
| 17340366 | Gtf2a1l   | 0.75780307   | 0.036354219 |
| 17393876 | Top1      | -0.610118492 | 0.03636014  |
| 17523326 | Deb1      | 0.494427089  | 0.03636594  |
| 17208897 |           | -0.701192931 | 0.036375357 |
| 17297100 | Kctd6     | 0.420161392  | 0.036383947 |
| 17278818 | Mir329    | 0.605558591  | 0.036383947 |
| 17442203 | Setd1b    | -0.406716435 | 0.036383947 |
| 17490935 | Spaca4    | -0.51062973  | 0.036383947 |
| 17424656 | Tpm2      | -0.461463755 | 0.036383947 |
| 17414529 | Gm12909   | -0.553190866 | 0.036407573 |
| 17278824 | Mir1193   | 0.676829765  | 0.036408592 |
| 17209091 |           | -1.095605842 | 0.036408592 |
| 17499392 |           | 0.626732724  | 0.036434523 |
| 17446608 | Mnx1      | -0.64819261  | 0.036466677 |

|          |               |              |             |
|----------|---------------|--------------|-------------|
| 17449517 |               | 0.632647736  | 0.036466677 |
| 17523105 | Wdr48         | 0.488153603  | 0.036489275 |
| 17232525 | Tspyl4        | 0.560318672  | 0.036495564 |
| 17368762 | Ddx31         | 0.470691923  | 0.036496246 |
| 17259794 | Rnf185        | 0.554336017  | 0.036500856 |
| 17210623 |               | 2.023481895  | 0.036500856 |
| 17485480 | AU018091      | 0.833615014  | 0.036554559 |
| 17344620 | Gm11127       | -0.852407445 | 0.036558397 |
| 17350754 | Gm15345       | -0.629030754 | 0.036565572 |
| 17494789 | Olfr485       | -0.719700759 | 0.036565572 |
| 17384456 |               | -1.118844369 | 0.036565572 |
| 17431065 | Pigv          | 0.488673274  | 0.036574304 |
| 17209851 |               | 0.884265212  | 0.036581878 |
| 17276151 |               | -0.866462993 | 0.03663706  |
| 17349930 | Pcdhb18       | 0.660679258  | 0.036639853 |
| 17232112 | C920009B18Rik | -0.766276184 | 0.036646364 |
| 17312022 | Wisp1         | -0.706853277 | 0.036646364 |
| 17438995 | Cxcl2         | -0.652615375 | 0.036658072 |
| 17481622 | Olfr503       | -0.555313522 | 0.036658072 |
| 17298935 | Gm19521       | -0.556677906 | 0.036661166 |
| 17532455 | 1110059G10Rik | 0.459055538  | 0.036690184 |
| 17412115 | Gm11872       | -0.572009015 | 0.036702731 |
| 17522789 |               | -0.787225314 | 0.036703844 |
| 17501283 | Scrg1         | -0.563693949 | 0.036705707 |
| 17203421 |               | 1.347874004  | 0.036705707 |
| 17333906 | Zfp677        | 0.880050455  | 0.036740796 |
| 17456689 |               | -0.644922483 | 0.036740796 |
| 17478271 |               | -0.958143247 | 0.036741608 |
| 17299502 | Olfr744       | -0.390884581 | 0.036763023 |
| 17200397 |               | 0.796413641  | 0.036763023 |
| 17426117 | Zfp37         | 0.465739275  | 0.036814531 |
| 17202389 |               | -0.897994802 | 0.036874534 |
| 17290865 | Epdr1         | -0.439819055 | 0.036882338 |
| 17482943 | Il4ra         | -1.211078458 | 0.036884985 |
| 17377412 | Cst9          | -0.463892927 | 0.03688585  |
| 17539797 | Clcn5         | 0.551266582  | 0.036889864 |
| 17520254 | Adamts7       | -0.757779563 | 0.03692163  |
| 17205527 |               | 1.18434544   | 0.036925441 |
| 17279584 | Esyt2         | -0.386742018 | 0.03695279  |
| 17416422 | LOC100034661  | -0.56927972  | 0.03695279  |
| 17207443 |               | 1.390256243  | 0.03695279  |
| 17323473 | Crkl          | 0.414011624  | 0.036955414 |
| 17477475 | Aspdh         | -0.43816087  | 0.036962756 |

|          |               |              |             |
|----------|---------------|--------------|-------------|
| 17372007 | Gm13708       | -0.703685325 | 0.036962756 |
| 17226203 | Epb4.115      | 0.467240459  | 0.03696498  |
| 17439815 | lbsp          | -0.542750811 | 0.03700318  |
| 17476632 | Scgb1b19      | -0.42856243  | 0.037010859 |
| 17546488 | LOC101055954  | -0.692650695 | 0.037030309 |
| 17203581 |               | -0.882059901 | 0.037030309 |
| 17387162 | Sestd1        | 0.694181244  | 0.037070538 |
| 17209915 |               | 1.60642182   | 0.037072213 |
| 17420811 | Gm1667        | -0.53397617  | 0.037096701 |
| 17405489 | Igsf10        | 0.719037182  | 0.037113927 |
| 17255118 | Mbtd1         | 0.494029035  | 0.037113927 |
| 17280913 | Nova1         | 0.851998185  | 0.037113927 |
| 17534293 | Rhox5         | 1.018928265  | 0.037113927 |
| 17548883 | Gm15067       | -0.61367011  | 0.037114817 |
| 17525561 | Pknox2        | -0.620694857 | 0.037114817 |
| 17343687 |               | -2.074054502 | 0.037114817 |
| 17424042 | Aptx          | 0.447193664  | 0.037169759 |
| 17390431 |               | -0.700738935 | 0.037171435 |
| 17337679 | Gm17495       | -0.393500295 | 0.037183254 |
| 17353101 | Gm15972       | -0.345833446 | 0.037214974 |
| 17476693 | Gm6096        | 0.494965309  | 0.037226072 |
| 17276105 | 2700049A03Rik | 0.405022552  | 0.037233498 |
| 17549926 | Mrgpra5       | -0.434306745 | 0.037250429 |
| 17257593 |               | 0.840242907  | 0.037251172 |
| 17431720 | Alpl          | -0.590777454 | 0.037263952 |
| 17376441 | Gm11037       | -0.649294241 | 0.037263952 |
| 17309006 | Pcdh20        | -0.357466241 | 0.037263952 |
| 17339142 | Ppp4r1        | 0.554680379  | 0.037263952 |
| 17333347 | Sod2          | 0.371621235  | 0.037263952 |
| 17407654 | Zfp687        | -0.428526532 | 0.037263952 |
| 17212341 |               | -0.416640516 | 0.037263952 |
| 17452615 | Diablo        | 0.413878375  | 0.037303782 |
| 17464040 | Pde3a         | -0.527646886 | 0.037303782 |
| 17379169 | Sgk2          | -0.51136326  | 0.037342309 |
| 17445370 | Cldn12        | 0.609478409  | 0.037344623 |
| 17237937 | B4galnt1      | 0.417153589  | 0.037361124 |
| 17210313 |               | -0.578364711 | 0.037361124 |
| 17371053 | Gm13572       | -0.637878711 | 0.037373147 |
| 17274180 | Gm16497       | -0.504068643 | 0.037395367 |
| 17529014 | Gm8074        | 0.519352356  | 0.037397741 |
| 17200159 |               | -0.732304714 | 0.037399004 |
| 17439351 | LOC665290     | -0.491681181 | 0.037415107 |
| 17485497 | Nlrp12        | -0.688217105 | 0.037415107 |

|          |               |              |             |
|----------|---------------|--------------|-------------|
| 17427686 | Slc35d1       | -0.353195775 | 0.037415107 |
| 17522803 |               | 0.802835506  | 0.037438158 |
| 17463654 |               | -0.548427286 | 0.037438158 |
| 17399663 | Jtb           | 0.449703184  | 0.037439013 |
| 17550711 |               | -0.68688508  | 0.037441214 |
| 17523279 |               | -0.487544508 | 0.037441781 |
| 17469613 | Ssu2          | -0.534988796 | 0.037452872 |
| 17202049 |               | -0.856059117 | 0.037469135 |
| 17410775 | Pkn2          | 0.355486987  | 0.037474511 |
| 17207433 |               | 1.111560882  | 0.037481362 |
| 17433003 | Gm15969       | -0.474402035 | 0.037492475 |
| 17290904 | Olfr1370      | -0.560637153 | 0.03750785  |
| 17395629 | Gata5         | -0.933223655 | 0.037508063 |
| 17472641 | Sox5          | -0.422362837 | 0.037508063 |
| 17327574 |               | 0.821129414  | 0.03751718  |
| 17271803 | Grin2c        | -0.495526827 | 0.037519114 |
| 17438321 |               | 0.413554581  | 0.037519114 |
| 17241257 | Col13a1       | -0.52643506  | 0.037530385 |
| 17204001 |               | 0.583767943  | 0.037530385 |
| 17472632 | 4930579D09Rik | -0.540299717 | 0.037541041 |
| 17496898 | Gm15503       | -0.441897691 | 0.037541041 |
| 17242316 | Gm3238        | -0.573719459 | 0.037541041 |
| 17516047 | Robo4         | -0.422816504 | 0.037541041 |
| 17205633 |               | 0.671976934  | 0.037541041 |
| 17416196 | C8b           | -0.403040454 | 0.037546018 |
| 17503254 | Klf1          | -0.76473453  | 0.037546018 |
| 17368292 | Gm13563       | 0.461756402  | 0.037570317 |
| 17208759 |               | -0.737972728 | 0.037611046 |
| 17209693 |               | 0.985897892  | 0.037611046 |
| 17430006 | Map7d1        | -0.360310875 | 0.037612596 |
| 17399972 | Hnrn          | 0.709046365  | 0.037617824 |
| 17203473 |               | -0.920880387 | 0.037633106 |
| 17292871 | Dbn1          | -0.342456166 | 0.037633401 |
| 17279102 | A230087F16Rik | -0.53664716  | 0.037657914 |
| 17321918 | Gm5476        | -0.459917822 | 0.037662259 |
| 17244653 |               | 0.563327166  | 0.037663246 |
| 17265554 | 4930401O10Rik | -0.686202018 | 0.037666187 |
| 17392947 | Defb23        | -0.518407011 | 0.037678489 |
| 17272941 | Gm11767       | -0.619057155 | 0.037709537 |
| 17548523 | Gm6253        | 0.77024493   | 0.037709537 |
| 17415606 | Nfia          | -0.69390886  | 0.037775084 |
| 17204389 |               | 0.832640981  | 0.037780031 |
| 17247064 | Gm11967       | -0.54553459  | 0.037821887 |

|          |               |              |             |
|----------|---------------|--------------|-------------|
| 17288856 | Pou5f2        | -0.467288752 | 0.037850868 |
| 17452889 | Ccdc92        | -0.506744448 | 0.037854987 |
| 17215539 | Spp2          | -0.770316106 | 0.037854987 |
| 17261645 | Foxi1         | -0.523505663 | 0.037858569 |
| 17454069 | Mospd3        | -0.453906807 | 0.037895949 |
| 17301852 | Gm9199        | 0.574012915  | 0.037912345 |
| 17287126 | Ippk          | 0.611751989  | 0.037912345 |
| 17215035 | Psmid1        | 0.409311379  | 0.037912345 |
| 17548942 |               | -0.423646208 | 0.037940544 |
| 17358832 | Ifit1         | 0.746293466  | 0.037947586 |
| 17374455 | Spred1        | -0.423364784 | 0.037947586 |
| 17317233 | Atad2         | 0.45972776   | 0.037956318 |
| 17359928 |               | 1.736807436  | 0.037956318 |
| 17543560 |               | -0.465918838 | 0.037957256 |
| 17358821 | Ifit3         | -0.469545467 | 0.037976362 |
| 17359562 |               | -0.652869873 | 0.037976362 |
| 17206187 |               | 1.018363696  | 0.038016109 |
| 17204281 |               | -0.832418425 | 0.038039282 |
| 17409911 | A730020M07Rik | -0.478414588 | 0.038052693 |
| 17412009 | Gm11861       | -0.47623451  | 0.038060382 |
| 17304850 | Dph3          | 0.391924182  | 0.038078586 |
| 17341024 |               | -0.549984427 | 0.038078586 |
| 17549866 |               | -0.491856675 | 0.038090848 |
| 17549874 |               | -0.491856675 | 0.038090848 |
| 17326162 | Gm16619       | -0.464885165 | 0.038098754 |
| 17466894 | Hoxa13        | -0.775105392 | 0.038113722 |
| 17326984 | Gm17518       | 0.504345742  | 0.038139213 |
| 17296170 | Gm10736       | -0.480836459 | 0.038160527 |
| 17314222 | Acr           | -0.421536927 | 0.03817117  |
| 17201785 |               | -0.639984595 | 0.038183604 |
| 17201961 |               | -0.639984595 | 0.038183604 |
| 17516434 | D630033O11Rik | -0.601144483 | 0.038187278 |
| 17255588 | Hoxb5         | -0.628192324 | 0.038187278 |
| 17454166 | Pilra         | -0.711472754 | 0.038195223 |
| 17263151 | Olfr332       | -0.491404013 | 0.038228131 |
| 17303593 | Lrrc3b        | -0.448306174 | 0.038229403 |
| 17507794 | Gm16725       | -0.504227963 | 0.038270172 |
| 17442977 | Crcp          | 0.559751426  | 0.038287283 |
| 17532621 | ND3           | -0.447584079 | 0.038287283 |
| 17325661 |               | 1.123150883  | 0.038287283 |
| 17209689 |               | -0.76180499  | 0.038287283 |
| 17334922 | Neurl1b       | -0.506442785 | 0.038298809 |
| 17203981 |               | 1.145558734  | 0.038300032 |



|          |               |              |             |
|----------|---------------|--------------|-------------|
| 17531531 | 5830462I19Rik | -0.427535726 | 0.038305701 |
| 17262136 | Gm4926        | -0.634512504 | 0.038305701 |
| 17517095 |               | -0.610280465 | 0.038305701 |
| 17408897 | Chi3l3        | -0.680706671 | 0.038329734 |
| 17307923 | Bnip3l        | 0.353997421  | 0.038331858 |
| 17393207 | Ahcy          | -0.780982455 | 0.038335751 |
| 17266146 | Gosr1         | 0.383305497  | 0.038350964 |
| 17550741 |               | -0.890250432 | 0.038350964 |
| 17338355 | Gm15556       | -0.695873762 | 0.038394142 |
| 17224395 | Mir375        | -0.512454062 | 0.038394142 |
| 17325369 |               | 0.562481772  | 0.038394142 |
| 17238870 |               | -0.439758753 | 0.038394142 |
| 17439942 | Zfp326        | 0.471514202  | 0.038416764 |
| 17443181 | Dnajc30       | -0.430199822 | 0.038428348 |
| 17203323 |               | 0.80709422   | 0.038447957 |
| 17471973 |               | 0.650855107  | 0.038448869 |
| 17203547 |               | -1.788515755 | 0.038456002 |
| 17550046 |               | -0.867977925 | 0.038456002 |
| 17422785 | Acap3         | -0.472636636 | 0.038458826 |
| 17420426 |               | -0.770324462 | 0.038479653 |
| 17308794 |               | 0.747867134  | 0.038479653 |
| 17332690 | C530047H08Rik | 0.416214407  | 0.038488615 |
| 17424346 | Gm21104       | -0.429883579 | 0.038497459 |
| 17279528 | Tmem121       | -0.628416401 | 0.038503062 |
| 17531981 |               | -1.025719148 | 0.038522755 |
| 17532710 | Gm14347       | -0.894198022 | 0.038523344 |
| 17203949 |               | 1.128738601  | 0.038532911 |
| 17229556 | Atf6          | 0.502317643  | 0.038547804 |
| 17394740 | Fam65c        | -0.47061307  | 0.038556883 |
| 17208083 |               | -1.043352496 | 0.038556883 |
| 17464848 |               | -0.3996625   | 0.038556883 |
| 17404906 | Gm12541       | -0.382062968 | 0.038562632 |
| 17410729 | Bmpr1b        | 0.61081786   | 0.038609961 |
| 17251046 | Myh1          | -0.455588667 | 0.038609961 |
| 17230960 | Prox1         | 0.752439406  | 0.038609961 |
| 17308153 | Synb          | -0.401420902 | 0.038609961 |
| 17347163 | Xdh           | -1.21410239  | 0.038609961 |
| 17370455 | Nek6          | -0.416372936 | 0.038637859 |
| 17230005 | Gm4955        | -0.489590746 | 0.038696804 |
| 17206465 |               | 1.062076474  | 0.03870858  |
| 17320838 | LOC100043315  | -0.475034983 | 0.038745538 |
| 17238860 |               | -0.629523602 | 0.038757971 |
| 17316175 | Basp1         | -0.361206007 | 0.038771184 |

|          |               |              |             |
|----------|---------------|--------------|-------------|
| 17210233 |               | 0.894337205  | 0.038790468 |
| 17361120 | Rps6kb2       | 0.470413414  | 0.038804453 |
| 17296007 |               | -0.529649693 | 0.038822785 |
| 17394182 | Sys1          | -0.687269053 | 0.038824763 |
| 17270315 | Gjc1          | -0.491185623 | 0.038836626 |
| 17201631 |               | -0.698959356 | 0.038836626 |
| 17206969 |               | 1.919125439  | 0.038856236 |
| 17547554 |               | 0.609852438  | 0.038866774 |
| 17335480 | Rab44         | -0.544190594 | 0.038874462 |
| 17202327 |               | 0.785940929  | 0.038926986 |
| 17468007 | Pole4         | 0.370917987  | 0.038929062 |
| 17245152 | Rab3ip        | 0.528656292  | 0.038929062 |
| 17543034 |               | -0.5168417   | 0.038929062 |
| 17219986 |               | 0.651800865  | 0.038929062 |
| 17352573 |               | -0.550528475 | 0.038932064 |
| 17316169 | 9230109A22Rik | -0.379426001 | 0.038938027 |
| 17206473 |               | 0.868128296  | 0.038955367 |
| 17210695 |               | -0.532951651 | 0.038962121 |
| 17297703 | 4930428N03Rik | -0.516643438 | 0.038976068 |
| 17200243 |               | -0.729263435 | 0.038978319 |
| 17542292 | DXBay18       | 0.425756732  | 0.038979834 |
| 17350517 | Hsd17b4       | 0.494666665  | 0.038979834 |
| 17414110 |               | -0.497352963 | 0.038979834 |
| 17463184 | Tnfrsf1a      | -0.484090838 | 0.038993168 |
| 17406460 | Dclk2         | 0.59372215   | 0.038997586 |
| 17457680 | Tcrb-J        | -0.475275895 | 0.038997586 |
| 17469919 | Tmem40        | 0.412811634  | 0.038997586 |
| 17271295 | 1700012B07Rik | -0.513737688 | 0.039000095 |
| 17356401 | Eif1ad        | 0.470087534  | 0.039012807 |
| 17261171 |               | -0.436681641 | 0.039012807 |
| 17276854 | Slc39a9       | 0.693402058  | 0.039015119 |
| 17258272 | Mrps7         | 0.517394407  | 0.039053352 |
| 17386454 | 6430710C18Rik | -0.434885019 | 0.03905685  |
| 17215296 | A530079E22Rik | -0.591061115 | 0.03905685  |
| 17334192 | Prss27        | 0.584973039  | 0.039058004 |
| 17383781 | Gm13405       | -0.455462846 | 0.039071106 |
| 17512119 |               | -0.432001617 | 0.039075458 |
| 17517132 | Cryab         | -0.49926556  | 0.039076472 |
| 17406323 | Mnd1          | 0.754788692  | 0.039076472 |
| 17406843 | 1500004A13Rik | 0.559741951  | 0.039076757 |
| 17458752 | 2410066E13Rik | 0.772257727  | 0.039109333 |
| 17302333 | 4930474H20Rik | -0.49901069  | 0.039109333 |
| 17462059 | Fam21         | 0.42992339   | 0.039109333 |

|          |               |              |             |
|----------|---------------|--------------|-------------|
| 17374201 | Olfr1299      | -0.59601257  | 0.039109333 |
| 17532045 | Plcd1         | 0.449916347  | 0.039109333 |
| 17346817 | Soga2         | 0.409131903  | 0.039109333 |
| 17510295 | Ushbp1        | -0.44345846  | 0.039109333 |
| 17344937 |               | -0.499005838 | 0.039109333 |
| 17247364 |               | -0.490887307 | 0.039109333 |
| 17420427 |               | 0.950190666  | 0.039109333 |
| 17209877 |               | -0.799072457 | 0.039109333 |
| 17466887 | Hoxa11        | -0.414042446 | 0.039114916 |
| 17398229 | 1110032F04Rik | -0.560746661 | 0.039122424 |
| 17207437 |               | 0.762804505  | 0.039122424 |
| 17380263 | 1700010B08Rik | -0.512149893 | 0.039125499 |
| 17326495 | Gm9017        | -0.474021921 | 0.03913548  |
| 17206549 |               | -0.862547968 | 0.03913548  |
| 17336407 | H2-DMa        | -0.442925229 | 0.039136988 |
| 17496183 | Nfatc2ip      | 0.485071194  | 0.039136988 |
| 17222326 | Coa5          | 0.415315781  | 0.039162025 |
| 17456001 | Glcci1        | 0.46515054   | 0.039162025 |
| 17422215 | Gm16333       | -0.819612434 | 0.039162025 |
| 17279169 | Mark3         | 0.364695927  | 0.039162025 |
| 17516518 | Mcam          | -0.481804955 | 0.039164192 |
| 17296321 | A430090L17Rik | -0.45483142  | 0.039170874 |
| 17506302 | 1700030M09Rik | -0.540895224 | 0.039174339 |
| 17337228 | Ier3          | -0.477603231 | 0.039183222 |
| 17220249 | 9130409I23Rik | -0.435331688 | 0.039183373 |
| 17208215 |               | -0.890994225 | 0.039183373 |
| 17265302 | Gm12315       | -0.379791348 | 0.039202532 |
| 17530128 | Nck1          | 0.457073081  | 0.03920743  |
| 17506030 | Hsd17b2       | 0.729907071  | 0.03920964  |
| 17207785 |               | 1.255081172  | 0.03920964  |
| 17270060 | Gm11586       | -0.663382868 | 0.039210385 |
| 17525007 | Dpy19l1       | 0.519831549  | 0.039216923 |
| 17380711 | Osbp12        | 0.510609166  | 0.039216923 |
| 17409154 | Gstm1         | -0.492654817 | 0.039217584 |
| 17266516 | Nlk           | 0.479811869  | 0.039218705 |
| 17321078 | Vdr           | -0.669840544 | 0.039218705 |
| 17202523 |               | 1.180460718  | 0.039218705 |
| 17378000 | Efcab8        | -0.416708948 | 0.039233208 |
| 17362121 | Tex40         | -0.440711496 | 0.039233208 |
| 17525329 | St3gal4       | 0.415010547  | 0.039233962 |
| 17519782 | Tmem30a       | 1.175776622  | 0.039253249 |
| 17340427 | Gm20939       | 0.528118191  | 0.039254389 |
| 17420036 | Asap3         | -0.446976084 | 0.039278888 |

|          |               |              |             |
|----------|---------------|--------------|-------------|
| 17444664 | Zfp655        | 0.401912311  | 0.039278888 |
| 17321989 | Krt74         | -0.831148114 | 0.039280051 |
| 17331642 | Mrpl39        | 0.327389768  | 0.039311699 |
| 17346774 | Twsg1         | 0.499724977  | 0.039311699 |
| 17393957 | Gm14242       | -0.447154891 | 0.039313825 |
| 17223329 | Gm17234       | -0.484974452 | 0.039313825 |
| 17205551 |               | -0.845315383 | 0.039313825 |
| 17455281 | Lnx2          | 0.655507877  | 0.039403792 |
| 17293258 | Spata31d1a    | -0.55776979  | 0.039403792 |
| 17219299 | Pfdn2         | 0.359597342  | 0.039408766 |
| 17246084 | Spryd4        | 0.381125453  | 0.039408766 |
| 17396564 | Lrriq4        | -0.435440392 | 0.039426704 |
| 17224015 | Abca12        | 0.514793236  | 0.039432396 |
| 17370641 | Epc2          | 0.472737422  | 0.039435234 |
| 17290072 |               | -1.599361278 | 0.039435234 |
| 17220166 | Acbd3         | 0.328110869  | 0.039438625 |
| 17383667 | Gm14486       | -0.574501204 | 0.039438625 |
| 17326598 | 4930567J20Rik | -0.345208904 | 0.039442964 |
| 17439861 | BC005561      | 0.540783652  | 0.039442964 |
| 17346956 | Myl12b        | 0.360535334  | 0.039442964 |
| 17479608 | Zscan2        | 0.551096463  | 0.039442964 |
| 17439481 | Bmp2k         | -0.45807463  | 0.039449148 |
| 17549152 |               | -0.507958386 | 0.039453852 |
| 17202211 |               | -0.768340527 | 0.039461942 |
| 17287799 | Gm3045        | -0.465513128 | 0.039463562 |
| 17229715 | Ufc1          | 0.330206108  | 0.039503784 |
| 17467537 |               | -0.652807017 | 0.039503784 |
| 17506942 | A630001O12Rik | -0.441979345 | 0.039511783 |
| 17369911 | Ak1           | -0.470956489 | 0.039511783 |
| 17534206 | Gm21098       | -0.398151588 | 0.039511783 |
| 17541703 | Mir18b        | -0.70775017  | 0.039511783 |
| 17269638 | Rab5c         | -0.320522929 | 0.039511783 |
| 17463644 | Tas2r125      | -0.406715931 | 0.039511783 |
| 17508166 |               | 0.553690376  | 0.039511783 |
| 17357532 |               | 0.735240681  | 0.039511783 |
| 17430958 |               | -0.611111204 | 0.039511783 |
| 17240527 | Gm9855        | 0.594410914  | 0.039515898 |
| 17542344 | Trex2         | 0.694760077  | 0.039527491 |
| 17451345 | 2900026A02Rik | -0.515264271 | 0.039528169 |
| 17350074 | Pabpc2        | -0.636521273 | 0.039535608 |
| 17458641 | Tax1bp1       | 0.326320427  | 0.039568397 |
| 17284455 |               | -0.632467203 | 0.039575646 |
| 17231963 | Mtfr2         | 0.554532717  | 0.039577972 |

|          |               |              |             |
|----------|---------------|--------------|-------------|
| 17443710 | Azgp1         | -0.395463424 | 0.039585309 |
| 17293717 | 1190003K10Rik | -0.320144886 | 0.039587268 |
| 17305272 | Gm7945        | -0.563213242 | 0.039587268 |
| 17501748 | Lpar2         | 0.76449644   | 0.039587268 |
| 17519718 | Mto1          | 0.460197238  | 0.039587268 |
| 17370369 | Olfr365       | -0.677455855 | 0.039587268 |
| 17462437 | Usp18         | 0.605105755  | 0.039587268 |
| 17336042 | Zfp952        | 0.462412886  | 0.039587268 |
| 17296011 |               | -1.016829886 | 0.039587268 |
| 17326502 |               | -0.544152176 | 0.039587268 |
| 17297209 | Olfr31        | -0.53593897  | 0.03965221  |
| 17499780 | Gm21002       | -0.50344347  | 0.039660166 |
| 17524355 | Olfr867       | -0.418582387 | 0.039675535 |
| 17287432 | Cplx2         | -0.344580554 | 0.039699265 |
| 17414971 | Tyrp1         | 0.869218699  | 0.039702431 |
| 17202271 |               | 0.993305997  | 0.039773649 |
| 17416893 | Gm12811       | -0.415982289 | 0.039781551 |
| 17268810 | Mien1         | 0.479663232  | 0.039813242 |
| 17524311 | Muc16         | -0.526807331 | 0.039813242 |
| 17330380 | Timmdc1       | 0.37766783   | 0.039818004 |
| 17531370 | Fbxw16        | -0.807518813 | 0.039843937 |
| 17308600 | Rb1           | 0.735705215  | 0.039883055 |
| 17466546 | Zfp786        | -0.484237135 | 0.03990436  |
| 17543141 | Mageb18       | -0.434869033 | 0.039912133 |
| 17456974 | 2210408F21Rik | -0.343737617 | 0.039950387 |
| 17493901 | Gm20476       | -0.515417658 | 0.039950387 |
| 17253885 | Adap2         | -0.892201746 | 0.039991109 |
| 17480327 | Alg8          | 0.564483249  | 0.039991109 |
| 17465830 | Mtpn          | 0.402541203  | 0.039991109 |
| 17239744 | Rps12         | -0.374583351 | 0.039991109 |
| 17343461 | Zfp871        | 0.578909415  | 0.039991109 |
| 17204323 |               | 1.143502578  | 0.039991109 |
| 17408960 | Cd53          | -0.899837432 | 0.0400018   |
| 17503596 | Papd5         | 0.347012492  | 0.040038463 |
| 17351482 |               | -0.635803212 | 0.040038463 |
| 17300215 | A430107P09Rik | -0.413202386 | 0.040039631 |
| 17537401 | Gm17714       | -0.478346503 | 0.040043925 |
| 17537442 | Gm17714       | -0.478346503 | 0.040043925 |
| 17345134 | Runx2         | -0.611755839 | 0.040043925 |
| 17203719 |               | -0.688146105 | 0.040046921 |
| 17376311 | Vps16         | 0.544198155  | 0.040077487 |
| 17476424 | Prodh2        | -0.628356567 | 0.040111608 |
| 17527818 | Senp8         | 0.453422819  | 0.040155675 |

|          |               |              |             |
|----------|---------------|--------------|-------------|
| 17265082 | Eif5a         | 0.371609532  | 0.040155693 |
| 17297497 | Chchd1        | -0.518881631 | 0.040156804 |
| 17305114 | n-R5s46       | -0.969018504 | 0.040156804 |
| 17362671 | Lrrc10b       | -0.509950146 | 0.040164544 |
| 17201211 |               | 0.762241501  | 0.040172745 |
| 17315436 |               | -0.779219841 | 0.040177372 |
| 17278858 | Mirg          | 0.825825859  | 0.040179708 |
| 17242296 | Fam207a       | 0.504463294  | 0.040186309 |
| 17204503 |               | -0.812734291 | 0.040222765 |
| 17214293 | Bcs1l         | 0.487121728  | 0.040223011 |
| 17356472 | Efemp2        | -0.367073883 | 0.040223011 |
| 17480588 | Mir326        | -0.597707459 | 0.040223011 |
| 17359143 | Lgi1          | 0.419534637  | 0.040236659 |
| 17284795 | Sp4           | 0.693506304  | 0.040259651 |
| 17315225 | Krt86         | -0.707570507 | 0.040261448 |
| 17430521 | Tmem39b       | 0.547548611  | 0.040261703 |
| 17312350 | Spatc1        | -0.389821712 | 0.040269644 |
| 17224608 | Gm15179       | -0.492275194 | 0.040283568 |
| 17397654 | 4931419H13Rik | -0.391268829 | 0.040287699 |
| 17417791 | Ebna1bp2      | 0.530268508  | 0.040287699 |
| 17349914 | Pcdhb14       | 0.733991792  | 0.040287699 |
| 17426356 | Tnfsf8        | 0.479425024  | 0.040287699 |
| 17492466 | 2610034B18Rik | 0.410808481  | 0.040293149 |
| 17388177 | Gm13783       | -0.566406368 | 0.040293149 |
| 17403150 | Tspan5        | 0.836238409  | 0.040293149 |
| 17216217 |               | -0.507702027 | 0.040293149 |
| 17272971 | Azi1          | -0.329937746 | 0.040297124 |
| 17309360 | Slitrk1       | 0.743810974  | 0.04030102  |
| 17450548 | Zfp644        | 0.403988218  | 0.040308059 |
| 17518109 | Uaca          | 0.477475359  | 0.040316227 |
| 17242207 | Pcbp3         | 0.382761401  | 0.04031841  |
| 17239384 | Phactr2       | 0.536811337  | 0.04031841  |
| 17503462 | Phkb          | 0.508667332  | 0.04031841  |
| 17205901 |               | 1.045110297  | 0.04031841  |
| 17220861 | Slc30a1       | 0.588433876  | 0.040324273 |
| 17536238 |               | -0.386243879 | 0.040329082 |
| 17415973 | Leprot        | 0.446972206  | 0.040331655 |
| 17332117 | Gm15966       | -0.5188127   | 0.040350696 |
| 17236172 | 4930486F22Rik | -0.322588394 | 0.04035554  |
| 17229113 | Gorab         | 0.613734801  | 0.04035554  |
| 17522916 | Itga9         | -0.419760855 | 0.04035554  |
| 17473423 | Ssc5d         | -0.584484202 | 0.04035554  |
| 17212778 | Tmem194b      | 0.451189538  | 0.04035554  |

|          |                  |              |             |
|----------|------------------|--------------|-------------|
| 17550807 |                  | -0.353033517 | 0.04035554  |
| 17251604 | 1700067G03Rik    | -0.588970488 | 0.040361836 |
| 17270730 | Limd2            | -0.332246653 | 0.040367225 |
| 17359113 | Ffar4            | -0.3978691   | 0.040389918 |
| 17233644 |                  | -0.609472337 | 0.040390667 |
| 17538056 | 4933428M09Rik    | -0.463034422 | 0.040402625 |
| 17229257 |                  | -0.509088178 | 0.040455475 |
| 17393483 | LOC101056574     | 0.493507277  | 0.040470628 |
| 17532737 | n-R5s2           | -0.700028697 | 0.040493157 |
| 17513240 | Adamts18         | 0.611371012  | 0.040499501 |
| 17337441 | Trim26           | 0.43612127   | 0.040503937 |
| 17366912 |                  | 0.805789881  | 0.040506279 |
| 17330456 | 4932412D23Rik    | -0.438021901 | 0.040531265 |
| 17269192 |                  | -0.323820696 | 0.040596061 |
| 17492826 | Homer2           | 0.537184211  | 0.040598478 |
| 17289396 | Ankra2           | 0.418406811  | 0.040600804 |
| 17439541 | 4930405H06Rik    | -0.565491125 | 0.040613534 |
| 17402558 | Elovl6           | 0.720767275  | 0.040613534 |
| 17274326 | Gm4983           | 0.426001917  | 0.040617391 |
| 17210059 |                  | -0.854707781 | 0.040617391 |
| 17450354 | Hsd17b13         | -0.602401164 | 0.040629853 |
| 17299919 | Trav15d-1-dv6d-1 | -0.470301922 | 0.040631635 |
| 17420154 | Wnt4             | 0.604147574  | 0.040631635 |
| 17484484 | Paox             | 0.448888343  | 0.040661459 |
| 17491211 | Hps5             | 0.446067735  | 0.040677248 |
| 17387267 | Neurod1          | 0.692996175  | 0.040677248 |
| 17202815 |                  | 0.631391855  | 0.040706214 |
| 17499255 | Cul4a            | 0.360699106  | 0.04071029  |
| 17298823 | Gm3219           | -0.393089344 | 0.04071979  |
| 17437350 | Gm20475          | -0.504331332 | 0.040738854 |
| 17546963 | Rbmy             | -0.548889633 | 0.040738854 |
| 17488406 | Supt5            | 0.563594959  | 0.040738854 |
| 17393334 |                  | 1.065896745  | 0.040740021 |
| 17253599 | Aldoc            | 0.574564709  | 0.040768101 |
| 17405352 | F830104G03Rik    | -0.449219939 | 0.040768101 |
| 17255048 | Gm525            | -0.406885158 | 0.040768101 |
| 17378337 | Map1lc3a         | -0.402984502 | 0.040768101 |
| 17370373 | Olfr367-ps       | -0.643204798 | 0.040768101 |
| 17250517 |                  | -0.363863597 | 0.040768101 |
| 17411492 | 4930573O21Rik    | -0.83609694  | 0.040768411 |
| 17357280 | Ganab            | 0.468364793  | 0.040776716 |
| 17255602 | Mir10a           | -0.438664969 | 0.040776716 |
| 17250392 | Myo15            | -0.367305683 | 0.040776716 |

|          |               |              |             |
|----------|---------------|--------------|-------------|
| 17469636 | Rad18         | 0.546985559  | 0.040782896 |
| 17289544 | Gm17160       | -0.622033735 | 0.040799284 |
| 17207679 |               | 0.828501866  | 0.040799284 |
| 17279542 | Adam6a        | -0.799973124 | 0.040827431 |
| 17540173 | Gm5132        | -0.401186915 | 0.040827431 |
| 17474389 | Mypop         | -0.410021168 | 0.040878279 |
| 17263423 | Zkscan17      | 0.381267764  | 0.040887088 |
| 17263355 | Gjc2          | -0.477432287 | 0.040890065 |
| 17397439 | Naa15         | 0.525566761  | 0.040890065 |
| 17547704 | Ppm1a         | 0.879510451  | 0.040890065 |
| 17383848 | Swi5          | 0.385116334  | 0.040890065 |
| 17418757 | 1700080G11Rik | -0.5819775   | 0.040898168 |
| 17493005 | Fah           | -0.520445085 | 0.040898168 |
| 17272810 | Gm11747       | -0.501940902 | 0.040898168 |
| 17478225 | Ldha          | 0.398467396  | 0.040898168 |
| 17274094 | Rpl15         | 0.340828677  | 0.040898168 |
| 17202665 |               | 0.681315622  | 0.040898168 |
| 17279957 | Msgn1         | -0.655006746 | 0.040917314 |
| 17206125 |               | -0.638688131 | 0.040950726 |
| 17472362 |               | -0.529664007 | 0.040954971 |
| 17372578 | Gm13718       | -0.401317432 | 0.040974804 |
| 17209763 |               | 1.088838287  | 0.040975532 |
| 17478889 | Apba2         | 0.517574495  | 0.040991998 |
| 17549478 |               | -0.530285895 | 0.040991998 |
| 17549624 |               | -0.530285895 | 0.040991998 |
| 17479521 | Tll13         | -0.366813326 | 0.040998938 |
| 17493916 | Inpp1         | -0.612772751 | 0.041008315 |
| 17464208 | Gm15687       | -0.467122234 | 0.04102764  |
| 17204663 |               | 0.99267345   | 0.041029777 |
| 17435567 | Paxip1        | 0.534663441  | 0.041145698 |
| 17271443 | Abca6         | -0.584905033 | 0.041146432 |
| 17549644 | Commd2        | 0.452919939  | 0.041146432 |
| 17377870 | Hck           | -0.777136427 | 0.041166889 |
| 17257896 | Gm11683       | -0.572967262 | 0.041188347 |
| 17392676 | Apmmap        | 0.468884003  | 0.04118888  |
| 17288650 | Ccdc127       | -0.392391852 | 0.04118888  |
| 17233600 | Ascc1         | 0.391942918  | 0.041193083 |
| 17522791 | Osbpl10       | -0.460589501 | 0.041193083 |
| 17291787 | Slc22a23      | 0.88353941   | 0.041193083 |
| 17350194 |               | -0.764556789 | 0.041193083 |
| 17229795 | Vangl2        | 0.601598494  | 0.04120713  |
| 17203661 |               | 1.411000668  | 0.041223678 |
| 17221215 | Cops5         | 0.343377209  | 0.041243934 |



|          |               |              |             |
|----------|---------------|--------------|-------------|
| 17320389 | Dennd6b       | 0.525122439  | 0.041243934 |
| 17405670 |               | 0.999287004  | 0.041243934 |
| 17503377 | Dhps          | 0.435586878  | 0.041256406 |
| 17398651 |               | 0.542900679  | 0.041256976 |
| 17206929 |               | 1.310558649  | 0.041256976 |
| 17314051 | Panx2         | -0.453994754 | 0.041260988 |
| 17428600 | Mast2         | -0.456734367 | 0.041267002 |
| 17368930 | Cercam        | -0.578527498 | 0.0412671   |
| 17546563 | Gm21428       | -0.396085863 | 0.041273748 |
| 17546635 | Gm21428       | -0.396085863 | 0.041273748 |
| 17428714 | Toe1          | 0.341228056  | 0.041277993 |
| 17460451 | 1600020E01Rik | 0.49200705   | 0.041295714 |
| 17474097 | Bbc3          | -0.381518793 | 0.041317575 |
| 17347265 | Gm16391       | -0.501810097 | 0.041319566 |
| 17310982 | Osr2          | 0.619164786  | 0.041319566 |
| 17216676 | En1           | -0.522593669 | 0.041325999 |
| 17256801 | LOC666331     | -0.391968554 | 0.041325999 |
| 17358227 | Ptar1         | 0.626683268  | 0.041325999 |
| 17358777 | Stambpl1      | 0.37410499   | 0.041325999 |
| 17203065 |               | 0.693596784  | 0.041325999 |
| 17273056 | 2900052L18Rik | 0.448214995  | 0.041328381 |
| 17537458 | Gm17714       | -0.480986    | 0.041389186 |
| 17502445 | 1700030K09Rik | 0.429391645  | 0.041408525 |
| 17267654 |               | -0.516569421 | 0.041408525 |
| 17248076 |               | 0.687403595  | 0.041408525 |
| 17317500 | Asap1         | -0.435696816 | 0.041410357 |
| 17481618 | Olfr497       | -0.495318248 | 0.041413935 |
| 17519936 | Gm5919        | -0.377688915 | 0.041418958 |
| 17208391 |               | -0.764927792 | 0.041421436 |
| 17306785 | Nedd8         | -0.403204248 | 0.041423575 |
| 17341631 | Prss33        | -0.477399245 | 0.041423575 |
| 17203097 |               | -0.944950855 | 0.041426151 |
| 17544453 | Trmt2b        | 0.607018147  | 0.041444688 |
| 17505740 |               | -0.564805613 | 0.04146865  |
| 17424596 | Fam166b       | -0.430512807 | 0.041501786 |
| 17235915 | Txnrd1        | 0.432495011  | 0.041501786 |
| 17281773 | Timm9         | 0.724894997  | 0.041532094 |
| 17297181 | Sntn          | -0.441484079 | 0.041532137 |
| 17374058 | Kif18a        | 0.405829111  | 0.041711527 |
| 17383571 | D2Wsu81e      | 0.701807365  | 0.041724078 |
| 17508464 | Hgsnat        | 0.496882114  | 0.041724078 |
| 17300839 | Mphosph8      | 0.449433333  | 0.041724078 |
| 17440164 | Ccdc18        | 0.608490142  | 0.041738762 |

|          |               |              |             |
|----------|---------------|--------------|-------------|
| 17459386 | Gm10360       | -0.598924262 | 0.041739027 |
| 17472703 |               | -0.911996796 | 0.04178857  |
| 17484563 | Olfr535       | -0.466436397 | 0.041813426 |
| 17358032 | 2410127L17Rik | 0.359115531  | 0.041832499 |
| 17423433 | Otud6b        | 0.521431749  | 0.041836925 |
| 17266498 | Nlk           | 0.368330392  | 0.041855448 |
| 17207081 |               | -0.855002928 | 0.041872256 |
| 17425038 | Nans          | 0.6381816    | 0.041900468 |
| 17201097 |               | 2.008879445  | 0.041954762 |
| 17366031 | Vax1          | -0.534463966 | 0.042030177 |
| 17235730 | 2210404O07Rik | -0.39945823  | 0.042035304 |
| 17432463 | Gm13088       | -0.455848975 | 0.042035304 |
| 17464783 | Gm16055       | -0.423471869 | 0.042035304 |
| 17424952 | Shb           | -0.442009832 | 0.042035304 |
| 17506327 | Gm20269       | 0.616505104  | 0.042038965 |
| 17347074 | Gm15641       | -0.389333563 | 0.04204289  |
| 17260697 |               | -0.809734963 | 0.04204289  |
| 17376867 | Btbd3         | 0.460149605  | 0.042046662 |
| 17262662 | Gm12212       | -0.449145835 | 0.042055967 |
| 17527963 | Paqr5         | 0.449059236  | 0.042059553 |
| 17462170 | Zfp637        | 0.446563806  | 0.042060572 |
| 17269954 | Etv4          | -0.452375809 | 0.042076798 |
| 17392561 | Foxa2         | 0.584877538  | 0.042082664 |
| 17204911 |               | -0.985349294 | 0.042082664 |
| 17285736 | Gm11291       | -0.484986476 | 0.042084292 |
| 17537336 |               | -0.801699796 | 0.042093268 |
| 17470313 | Wnt5b         | -0.365159362 | 0.042095337 |
| 17207721 |               | 1.485095882  | 0.042109988 |
| 17363598 | Fxn           | 0.411005073  | 0.042120675 |
| 17423709 |               | -0.439201952 | 0.042131379 |
| 17550681 |               | -0.464165242 | 0.042139368 |
| 17277519 |               | -0.805503564 | 0.042144349 |
| 17226297 | Tmem37        | -0.51259895  | 0.042173235 |
| 17492905 | Il16          | -0.340480738 | 0.042183944 |
| 17258789 | Tnrc6c        | -0.561970734 | 0.042183944 |
| 17538784 |               | -0.623684889 | 0.042183944 |
| 17428497 | Tex38         | -0.471507097 | 0.042216386 |
| 17316161 |               | -0.533170696 | 0.042243398 |
| 17216240 |               | -0.511524722 | 0.042254676 |
| 17292772 | 4930526F13Rik | -0.456665884 | 0.042260001 |
| 17218233 | Colgalt2      | 0.460227719  | 0.042328293 |
| 17432426 | Prdm2         | 0.648998635  | 0.042328293 |
| 17204571 |               | 0.58618797   | 0.042328293 |

|          |               |              |             |
|----------|---------------|--------------|-------------|
| 17268642 |               | -0.830060377 | 0.042328293 |
| 17288420 | 4933416O17Rik | -0.393076526 | 0.042330952 |
| 17529859 | E030011O05Rik | 0.340020462  | 0.042330952 |
| 17211850 | Cox5b         | -0.632931942 | 0.042353286 |
| 17391487 | Gm14011       | -0.474782385 | 0.042353286 |
| 17392943 | Zcchc3        | -0.578039564 | 0.042353286 |
| 17259314 | Fscn2         | -0.461323735 | 0.042354408 |
| 17507347 | Fam155a       | 0.872006728  | 0.042354472 |
| 17486942 |               | -0.889182638 | 0.042363688 |
| 17491975 | 1700112J16Rik | -0.46492846  | 0.042364865 |
| 17271051 | Bptf          | -0.42767526  | 0.042364865 |
| 17436987 | Gm1043        | -0.447290926 | 0.042364865 |
| 17421476 | Gm13139       | 0.57256145   | 0.042364865 |
| 17399914 | Lce3d         | -0.707062347 | 0.042364865 |
| 17386479 | Mir5115       | -1.048250937 | 0.042364865 |
| 17348449 | Riok3         | 0.411883794  | 0.042364865 |
| 17203389 |               | -0.567202561 | 0.042365699 |
| 17521070 | Mrpl3         | 0.363508176  | 0.042379786 |
| 17525393 |               | -0.504405682 | 0.04238069  |
| 17277472 | Ift43         | 0.350648703  | 0.042418883 |
| 17202869 |               | 1.513580469  | 0.042438718 |
| 17208207 |               | 1.008377026  | 0.042443864 |
| 17416537 | 4933424M12Rik | -0.60581692  | 0.042444835 |
| 17547867 | 9930017N22Rik | 0.686725321  | 0.042444835 |
| 17399649 | Rab13         | 0.37107195   | 0.042471935 |
| 17348276 | Fzd8          | -0.425703896 | 0.04250049  |
| 17424018 | Topors        | 0.380466622  | 0.042508287 |
| 17282789 | Ngb           | -0.570254114 | 0.0425381   |
| 17311447 | 1700022A22Rik | -0.443091102 | 0.042539924 |
| 17452776 | Mphosph9      | 0.546552375  | 0.042551865 |
| 17518616 | Rbpms2        | -0.780052654 | 0.042551865 |
| 17547905 | Gm20555       | -0.338275054 | 0.042570917 |
| 17429301 | Gm12866       | -0.558806184 | 0.042581058 |
| 17413832 | Nans          | 0.42210547   | 0.042582805 |
| 17438621 | Ugt2b35       | -0.346226546 | 0.042586745 |
| 17277863 | 3300002A11Rik | -0.572775556 | 0.042588599 |
| 17319150 | Baiap2l2      | -0.473522474 | 0.042588599 |
| 17201219 |               | 0.871165653  | 0.042588599 |
| 17376423 | Hspa12b       | -0.414692956 | 0.042619223 |
| 17535284 | Mam1d1        | 0.864412635  | 0.042619223 |
| 17313654 | Tspo          | -0.675906088 | 0.042619223 |
| 17298250 | Tmem110       | 0.408672354  | 0.042675754 |
| 17482079 | 1110006G14Rik | -0.544380362 | 0.04268108  |

|          |               |              |             |
|----------|---------------|--------------|-------------|
| 17531581 | Nradd         | 0.728091669  | 0.042700054 |
| 17261969 | Ttc1          | 0.359463057  | 0.042700054 |
| 17431266 | Grrp1         | -0.477988257 | 0.042739713 |
| 17313260 | Xpnpep3       | 0.659369235  | 0.042754884 |
| 17511660 | Ces1b         | -0.475441366 | 0.042760406 |
| 17498208 | Trpm5         | -0.55468086  | 0.042760406 |
| 17410090 | 1700006A11Rik | -0.440538037 | 0.042765676 |
| 17202101 |               | -0.728771877 | 0.042815074 |
| 17282942 | Gm10436       | -0.509356245 | 0.042832852 |
| 17219455 |               | 0.523386891  | 0.042832852 |
| 17344728 | H2-M10.1      | -0.720625568 | 0.042836342 |
| 17456074 | 1110019D14Rik | -0.402551712 | 0.042856426 |
| 17261120 |               | -0.581554682 | 0.042881533 |
| 17238894 |               | -0.355770805 | 0.042886796 |
| 17491961 | Asb7          | 0.441344911  | 0.042891966 |
| 17337224 | 4833427F10Rik | -0.536561095 | 0.042901006 |
| 17400043 | C2cd4d        | -0.569935425 | 0.042901006 |
| 17293163 | Mir7-1        | 0.789074942  | 0.042901006 |
| 17398274 | Ppm1l         | 0.607356776  | 0.042901006 |
| 17350652 | Gm19466       | -0.689222226 | 0.042913726 |
| 17470930 | Leprel2       | -0.609117789 | 0.04292687  |
| 17275612 | Mipol1        | 0.392668405  | 0.04292687  |
| 17357362 | Mta2          | 0.51550009   | 0.04292687  |
| 17265386 | Scimp         | -0.58723896  | 0.04292687  |
| 17542965 |               | -0.95123323  | 0.04292687  |
| 17521178 | Poc1a         | 0.512447317  | 0.042927549 |
| 17201339 |               | 0.752072994  | 0.042927549 |
| 17547008 |               | -0.419912432 | 0.042942701 |
| 17208635 |               | 0.857799785  | 0.042965124 |
| 17284995 | Gm5444        | -0.409444723 | 0.043019428 |
| 17359285 |               | -0.362928196 | 0.04302769  |
| 17485724 | Rdh13         | 0.343181015  | 0.043037806 |
| 17261250 | Ccdc104       | 0.418292276  | 0.043074693 |
| 17452853 | Rilpl2        | -0.429452305 | 0.043074693 |
| 17383199 | Rexo4         | 0.378452445  | 0.043089141 |
| 17453132 |               | 1.248483862  | 0.043109695 |
| 17208923 |               | 0.620573457  | 0.04313183  |
| 17317046 | Tnfrsf11b     | 0.531769857  | 0.043142698 |
| 17285404 |               | -0.508731761 | 0.043143355 |
| 17545756 | Gm15241       | -0.580514876 | 0.043161399 |
| 17314049 |               | -0.828810556 | 0.043190349 |
| 17210051 |               | -0.821899151 | 0.043196525 |
| 17247948 | Efemp1        | 1.017228497  | 0.043202367 |

|          |               |              |             |
|----------|---------------|--------------|-------------|
| 17384453 |               | 0.426718233  | 0.043217069 |
| 17207301 |               | 0.833542656  | 0.043242887 |
| 17546614 |               | -0.43538793  | 0.043242887 |
| 17339973 | Pkdcc         | -0.412302884 | 0.043273151 |
| 17429341 | Lepre1        | 0.587519841  | 0.043291146 |
| 17308466 |               | 0.477090391  | 0.043291146 |
| 17505967 | Cmip          | -0.437104339 | 0.04329759  |
| 17408156 | Gja8          | 0.783178528  | 0.04329759  |
| 17442507 | Setd8         | 0.401285232  | 0.04329759  |
| 17542320 | Xlr3c         | 1.077952886  | 0.04329759  |
| 17253667 | Sebox         | -0.690929856 | 0.043300728 |
| 17470235 | Cacna1c       | -0.617497325 | 0.043308784 |
| 17528947 | 2810047F03Rik | 0.561130532  | 0.043319418 |
| 17501940 | Crlf1         | -0.528783458 | 0.043319418 |
| 17372136 | Gm13658       | -0.444665229 | 0.043319418 |
| 17266418 | Gm3948        | -0.57391624  | 0.043319418 |
| 17337155 | Pou5f1        | -0.625636584 | 0.043319418 |
| 17407246 | Creb3l4       | 0.527582401  | 0.043321258 |
| 17450199 | Nkx6-1        | -0.38148183  | 0.04332307  |
| 17513672 | Cyba          | -0.556486498 | 0.043337318 |
| 17548786 |               | -0.550394592 | 0.043337318 |
| 17301920 | 4933402J15Rik | -0.540156918 | 0.043363074 |
| 17227261 | Gpr37l1       | -0.468749917 | 0.043363074 |
| 17516915 | Apoa5         | -0.738817876 | 0.043381512 |
| 17542239 | Cetn2         | 0.353945341  | 0.043381512 |
| 17377360 | Gzf1          | 0.344390581  | 0.043381512 |
| 17516127 | Olfr881       | -0.520655076 | 0.043381512 |
| 17203479 |               | -0.899164771 | 0.043381512 |
| 17547484 | Gm21428       | -0.442719272 | 0.043382839 |
| 17210311 |               | 0.950820966  | 0.043402694 |
| 17442307 | Lrrc43        | -0.719294104 | 0.043426149 |
| 17370326 | Olfr338       | -0.631504515 | 0.043426149 |
| 17526120 | Rnf26         | -0.468101079 | 0.043426149 |
| 17532811 | Foxp3         | -0.475344819 | 0.043427609 |
| 17363160 |               | -0.483552687 | 0.043448679 |
| 17278261 | Serpina3b     | -0.376049853 | 0.043466269 |
| 17321711 | 5330439K02Rik | -0.528561224 | 0.043483462 |
| 17473338 | Gm15873       | -0.442092491 | 0.043532461 |
| 17227864 |               | 0.553219966  | 0.043540637 |
| 17362289 | Mark2         | 0.620028867  | 0.043546365 |
| 17459288 |               | -0.484188934 | 0.043547689 |
| 17548783 | 9430032J07Rik | -0.353525305 | 0.043586505 |
| 17362031 | Slc22a12      | -0.463244689 | 0.043586505 |

|          |               |              |             |
|----------|---------------|--------------|-------------|
| 17537883 | Tceal7        | 0.508880599  | 0.043599577 |
| 17535477 | Gm20455       | -0.389893174 | 0.043604281 |
| 17343207 | Wdr4          | 0.421533907  | 0.043628992 |
| 17202705 |               | -0.638966982 | 0.043655936 |
| 17538744 | Huwe1         | -0.51602133  | 0.043670852 |
| 17493772 | Dnajib13      | -0.499059096 | 0.043692285 |
| 17239611 | Slc35d3       | -0.470343048 | 0.043692285 |
| 17377672 | Tcf15         | 0.93368294   | 0.043692285 |
| 17219086 | Tmco1         | 0.425845709  | 0.043692285 |
| 17360004 | Tmem180       | -0.421623806 | 0.043692285 |
| 17337250 | Mdc1          | 0.546381393  | 0.043695842 |
| 17505648 | Cog4          | 0.483414467  | 0.043697008 |
| 17201547 |               | -0.582540257 | 0.043721285 |
| 17208639 |               | 0.834215402  | 0.043724283 |
| 17443732 | Zkscan1       | 0.529514563  | 0.043740666 |
| 17407926 | Mrps21        | -0.463075061 | 0.043786886 |
| 17359961 |               | -1.588604653 | 0.043787487 |
| 17203395 |               | 1.409134993  | 0.04380058  |
| 17345422 | Cul9          | -0.319760819 | 0.043819372 |
| 17233554 | Pla2g12b      | 0.866804218  | 0.043830743 |
| 17248686 | 4930597A21Rik | -0.453439948 | 0.043834124 |
| 17200155 |               | 0.9241974    | 0.043861078 |
| 17379960 | Ptpn1         | -0.37818772  | 0.043907613 |
| 17406182 | Gm9989        | -0.45043972  | 0.043950296 |
| 17374174 | Olf1280       | -0.521760098 | 0.043955717 |
| 17266259 | LOC101055794  | -0.432287871 | 0.043957419 |
| 17459095 | n-R5s162      | -0.978526656 | 0.043961386 |
| 17464549 | Calcr         | -0.417973885 | 0.04398649  |
| 17546923 | Rbmy          | -0.435098902 | 0.04398905  |
| 17220600 | D1Pas1        | -0.476405857 | 0.043999649 |
| 17416897 | Faf1          | 0.36753138   | 0.043999649 |
| 17546753 | Gm21419       | -0.491307687 | 0.043999649 |
| 17284496 |               | -0.410690928 | 0.043999649 |
| 17509806 |               | -0.441504892 | 0.044007535 |
| 17276253 |               | 0.499882062  | 0.044007588 |
| 17376300 | 1700020A23Rik | -0.353081434 | 0.044041908 |
| 17360916 | 1700030N03Rik | -0.531680792 | 0.044041908 |
| 17487361 | Apoc2         | -0.911588827 | 0.044041908 |
| 17215101 | Gm5258        | -0.655013301 | 0.044041908 |
| 17532341 | Lyzl4         | -0.529413343 | 0.044041908 |
| 17244913 | Zdhhc17       | 0.742616708  | 0.044041908 |
| 17341693 |               | 0.329335959  | 0.044041908 |
| 17405893 | Slitrk3       | 0.69043036   | 0.044064893 |

|          |               |              |             |
|----------|---------------|--------------|-------------|
| 17550653 |               | -0.475862467 | 0.044069735 |
| 17390433 | Zscan29       | -0.501162368 | 0.04407083  |
| 17547598 | Nt5c          | -0.426416952 | 0.044094998 |
| 17444254 | Slc29a4       | 0.543636363  | 0.044094998 |
| 17208087 |               | 1.381279561  | 0.044099794 |
| 17292390 | Wnk2          | 0.505452748  | 0.044101107 |
| 17487249 | Mark4         | -0.42217029  | 0.044127102 |
| 17475251 | Megf8         | -0.586415123 | 0.044127102 |
| 17367740 | Zmynd19       | 0.379633885  | 0.0441273   |
| 17203765 |               | -0.541452994 | 0.04413026  |
| 17364242 |               | -1.092475742 | 0.044133286 |
| 17509964 | LOC100048268  | 0.421667159  | 0.044155008 |
| 17214405 | Gm15841       | -0.585141612 | 0.044163453 |
| 17401629 | Gnat2         | -0.431470391 | 0.044163453 |
| 17465636 | Plxna4        | -1.455911133 | 0.044163453 |
| 17509288 | Wwc2          | -0.470197457 | 0.044163453 |
| 17200313 |               | 0.829062998  | 0.044163453 |
| 17276928 | 6530401F13Rik | -0.45853714  | 0.044175448 |
| 17218820 | Sele          | -0.537473859 | 0.044181143 |
| 17511567 | Aktip         | 0.453543023  | 0.044214311 |
| 17489610 | Pdcd2l        | 0.552061458  | 0.044214311 |
| 17209709 |               | 0.933456996  | 0.044219543 |
| 17451677 | Cabp1         | -0.441906413 | 0.04422191  |
| 17281971 | Sgpp1         | -0.678470725 | 0.04422191  |
| 17262416 | Zfp454        | 0.640014899  | 0.04422191  |
| 17208753 |               | 1.245899633  | 0.04422191  |
| 17309338 |               | -0.811928915 | 0.04422191  |
| 17244393 |               | -0.450408288 | 0.044256947 |
| 17372072 | Hoxd8         | -0.48796048  | 0.044264206 |
| 17544308 | Gm14950       | -0.406227378 | 0.044283379 |
| 17476728 | Cebpa         | -0.564707298 | 0.044295736 |
| 17358617 | Uhrf2         | 0.413668201  | 0.044314788 |
| 17489873 | Uri1          | 0.473313034  | 0.044314788 |
| 17458407 | Abp1          | -0.543317518 | 0.044344141 |
| 17437702 | Mir574        | -0.682195829 | 0.044348554 |
| 17500060 | Mir486        | -0.646371337 | 0.044351015 |
| 17318002 | Slurp1        | -0.345850854 | 0.044351015 |
| 17443310 | Mdh2          | 0.442125811  | 0.044351052 |
| 17202025 |               | 1.116976645  | 0.044369342 |
| 17203261 |               | 1.001948811  | 0.044395717 |
| 17448335 | Pds5a         | 0.377250414  | 0.044400528 |
| 17283082 | Lysmd1        | 0.789699855  | 0.044403765 |
| 17218460 | 2810025M15Rik | -0.552241005 | 0.044406897 |

|          |               |              |             |
|----------|---------------|--------------|-------------|
| 17266185 | Ccdc55        | 0.395994393  | 0.044406897 |
| 17459696 | Gm15401       | -0.456179453 | 0.044406897 |
| 17298791 | Rpl23a        | -0.418033846 | 0.044406897 |
| 17302600 | Slitrk5       | 0.550865608  | 0.044406897 |
| 17299898 | Trav9n-1      | -0.360242192 | 0.044406897 |
| 17303623 |               | -0.967963862 | 0.044406897 |
| 17402097 |               | 0.528877826  | 0.04441221  |
| 17509527 | Gm16178       | -0.447045943 | 0.044417452 |
| 17469537 | Gm15631       | -0.586247325 | 0.044440461 |
| 17301689 | 4930480K23Rik | 0.532799946  | 0.044443375 |
| 17274190 | Gm5432        | -0.479953508 | 0.044462665 |
| 17229020 | Fmo1          | 0.479847383  | 0.044469483 |
| 17496857 | Cox6a2        | 0.398472237  | 0.044491777 |
| 17225085 | Gm16092       | -0.742624262 | 0.044491777 |
| 17315045 | Dazap2        | -0.405219541 | 0.044497649 |
| 17212355 | LOC101056345  | 0.484089414  | 0.044497649 |
| 17508416 | Bag4          | 0.407037071  | 0.044502729 |
| 17204951 |               | 0.946723589  | 0.04450738  |
| 17518102 | 1700036A12Rik | -0.456218211 | 0.044525828 |
| 17545409 | A230072E10Rik | -0.394000231 | 0.044525828 |
| 17418030 | Gm12860       | -0.482594929 | 0.044525828 |
| 17440885 | Myo1h         | -0.336230924 | 0.044525828 |
| 17314699 | Prph          | 0.58069735   | 0.044525828 |
| 17437727 | Wdr19         | 0.661374432  | 0.044525828 |
| 17423901 | Zfp292        | 0.582837313  | 0.044525828 |
| 17331640 |               | -0.636406615 | 0.044525828 |
| 17270087 |               | -1.037873259 | 0.044525828 |
| 17211973 | Unc50         | 0.357687706  | 0.044527046 |
| 17204053 |               | 1.258175947  | 0.044527441 |
| 17280919 |               | -0.689539942 | 0.044527441 |
| 17268071 | Tmem92        | -0.54407299  | 0.044529109 |
| 17203561 |               | -0.497912162 | 0.044529109 |
| 17473810 | Zfp324        | 0.647540812  | 0.044530089 |
| 17536961 | Chic1         | 0.610492733  | 0.044559659 |
| 17289813 | Actbl2        | -0.597125335 | 0.044610391 |
| 17380749 | Gm14318       | -0.567905841 | 0.04461515  |
| 17520043 | Cyb5r4        | 0.437916834  | 0.044678274 |
| 17308132 | Slc25a37      | 0.567414339  | 0.044678274 |
| 17363640 | Foxd4         | -0.582933505 | 0.044678988 |
| 17359964 |               | -0.663896612 | 0.044682417 |
| 17512337 | B3gnt9        | -0.663762308 | 0.044683852 |
| 17264448 | Arhgef15      | -0.341138747 | 0.044685045 |
| 17544025 | Fndc3c1       | -0.926906774 | 0.044685045 |



|          |          |              |             |
|----------|----------|--------------|-------------|
| 17427456 | Gm12676  | -0.492014958 | 0.044685045 |
| 17284858 |          | -0.676188627 | 0.044685045 |
| 17398785 | Arhgef11 | -0.411981105 | 0.04472595  |
| 17495553 | Coq7     | 0.486168564  | 0.04472595  |
| 17428803 | Kif2c    | 0.807962517  | 0.04472595  |
| 17352462 | Kif5b    | 0.341162685  | 0.04472595  |
| 17481227 | Olfr628  | -0.42438774  | 0.04472595  |
| 17410748 | Pdlim5   | -0.375473277 | 0.04472595  |
| 17250948 | Sco1     | 0.607246596  | 0.04472595  |
| 17510898 | Scoc     | -0.646570632 | 0.04472595  |
| 17222800 | Slc39a10 | 0.383379961  | 0.04472595  |
| 17535607 | Slc6a8   | -0.430240747 | 0.04472595  |
| 17267932 | Spata20  | -0.449362902 | 0.04472595  |
| 17381511 | Gm10855  | -0.56418558  | 0.044728098 |
| 17280577 | Hbp1     | 0.384316636  | 0.044728098 |
| 17362970 | Gm19261  | -0.537752628 | 0.044778798 |
| 17430288 | Adc      | -0.592672308 | 0.044785781 |
| 17377405 | Cst13    | -0.407795937 | 0.044785781 |
| 17394239 | Wfdc11   | -0.414460981 | 0.044785781 |
| 17444416 | Rsph10b  | 0.437753335  | 0.044790767 |
| 17535245 | Aff2     | -0.798895189 | 0.044812111 |
| 17548321 | Efhd2    | -0.414149739 | 0.044812111 |
| 17362609 | Fen1     | 0.491531376  | 0.044820043 |
| 17345706 | Tomm6    | -0.494588019 | 0.044872689 |
| 17479516 | Gdpgp1   | 0.479281478  | 0.044897248 |
| 17201833 |          | -0.67586205  | 0.044919474 |
| 17533956 | Gm14354  | -0.682132944 | 0.044923092 |
| 17502714 | Slc10a7  | 0.547053044  | 0.044931072 |
| 17308481 |          | 0.438655943  | 0.044931072 |
| 17273747 |          | -0.422943716 | 0.044943929 |
| 17418904 | Ak2      | 0.452561241  | 0.044955394 |
| 17204685 |          | 0.650456353  | 0.044988072 |
| 17438728 | Smr2     | -0.642387594 | 0.044998494 |
| 17252183 | Eno3     | -0.628790091 | 0.045004299 |
| 17428946 | Atp6v0b  | 0.452738412  | 0.045015181 |
| 17428278 | Skint9   | -0.389392477 | 0.045015181 |
| 17520034 | Prss35   | 0.471814943  | 0.045032979 |
| 17388592 | Mir129-2 | 0.563924323  | 0.045073863 |
| 17328654 | Pi4ka    | -0.506886258 | 0.045073863 |
| 17518573 | Mtfmt    | 0.434811751  | 0.045079032 |
| 17551119 |          | -2.164201216 | 0.045079098 |
| 17478745 | Atp10a   | -0.570889452 | 0.04508147  |
| 17236934 | Cep290   | 0.493280661  | 0.04508147  |

|          |               |              |             |
|----------|---------------|--------------|-------------|
| 17393531 | Cnbd2         | -0.650686831 | 0.04508147  |
| 17299353 | Ktn1          | 0.386564648  | 0.04508147  |
| 17286893 | Rnf182        | -0.392277855 | 0.04508147  |
| 17361522 | Sf3b2         | 0.507379596  | 0.04508147  |
| 17480100 | n-R5s155      | -0.668125134 | 0.045085934 |
| 17525395 | Gm1113        | -0.536502243 | 0.045134859 |
| 17204915 |               | 0.843888716  | 0.045134859 |
| 17264844 | Eif4a1        | 0.353690898  | 0.045145817 |
| 17253839 | Suz12         | 0.447352629  | 0.045145817 |
| 17290259 | Ucn3          | -0.612327861 | 0.045147115 |
| 17536225 | Gm14781       | -0.52908612  | 0.045153712 |
| 17204693 |               | 1.222001631  | 0.04516147  |
| 17334722 | Rpusd1        | 0.714229337  | 0.045175008 |
| 17401526 | Kcna3         | -0.481128318 | 0.045177145 |
| 17279107 | A230065H16Rik | -0.499164339 | 0.045190664 |
| 17335234 | Scube3        | -0.681980942 | 0.045190664 |
| 17209131 |               | -0.729943734 | 0.045214919 |
| 17288414 | Med10         | 0.40804335   | 0.045224438 |
| 17422745 | Dvl1          | -0.375413925 | 0.045230092 |
| 17315860 | Slc1a3        | 0.69737297   | 0.045230092 |
| 17203847 |               | -0.794576097 | 0.045230092 |
| 17501550 | Naf1          | -0.40657798  | 0.045230749 |
| 17206103 |               | -0.922620776 | 0.045230749 |
| 17367388 |               | -0.450307951 | 0.045232783 |
| 17278700 | Mir3070b      | 0.933573022  | 0.045235866 |
| 17381128 | Opr1          | 0.405405426  | 0.045235866 |
| 17346150 | Lrg1          | -0.513177254 | 0.045254537 |
| 17466441 | Fam115c       | -0.484839297 | 0.045258252 |
| 17400066 | Lingo4        | -0.407228917 | 0.0452774   |
| 17429921 | Dnali1        | -0.385363302 | 0.045278793 |
| 17490111 | Zfp715        | 0.687146607  | 0.045282721 |
| 17200829 |               | 1.206272958  | 0.045282721 |
| 17293240 |               | 0.644773326  | 0.045298446 |
| 17481550 | Olfml1        | 0.729970539  | 0.045302345 |
| 17381259 | Gm13191       | -0.445556357 | 0.045304085 |
| 17200741 |               | 1.634479781  | 0.045305507 |
| 17509498 | Gm15881       | -0.444625579 | 0.045308621 |
| 17448768 |               | -0.711984829 | 0.045324922 |
| 17392047 | Crls1         | -1.208198039 | 0.045348198 |
| 17370371 | Olfr366       | -0.504212609 | 0.045350564 |
| 17236182 | Timp3         | -0.602012674 | 0.045350564 |
| 17290193 |               | -0.37095219  | 0.045350564 |
| 17202981 |               | 0.849054902  | 0.045350564 |

|          |               |              |             |
|----------|---------------|--------------|-------------|
| 17284334 | Ighg          | -0.537097825 | 0.045365127 |
| 17321467 | Tuba1b        | 0.56040247   | 0.045365127 |
| 17440592 | Ttc28         | -0.712527072 | 0.045396712 |
| 17226867 | 1700037F24Rik | -0.34763524  | 0.045430562 |
| 17250615 | Grap          | -0.758845133 | 0.045430562 |
| 17246381 | Mettl7b       | -0.374460434 | 0.045430562 |
| 17384576 | Olfr362       | -0.555463227 | 0.045430562 |
| 17361276 | Rhod          | 0.478068558  | 0.045464169 |
| 17210681 |               | -0.757435299 | 0.045464169 |
| 17422573 | Gnb1          | 0.376998991  | 0.045465817 |
| 17225283 | Gm19582       | -0.499849602 | 0.045475862 |
| 17318140 | Gm19937       | -0.658478878 | 0.045494356 |
| 17407400 | Sprr1b        | 1.152222268  | 0.045494356 |
| 17438993 |               | -0.87333001  | 0.045494356 |
| 17360735 | Ccdc172       | -0.683219371 | 0.045498321 |
| 17330046 | Sec22a        | 0.506086221  | 0.045499758 |
| 17341996 |               | -0.657604283 | 0.045520498 |
| 17323064 |               | 0.916857723  | 0.045520498 |
| 17277177 | Dnal1         | 0.376580513  | 0.045531502 |
| 17209729 |               | 0.640221644  | 0.045565575 |
| 17544960 | Psm10         | 0.489964356  | 0.045579925 |
| 17547315 | Gm21428       | -0.392640121 | 0.045590044 |
| 17413674 | Aldh1b1       | -0.43250458  | 0.045595949 |
| 17260306 | Rps15a-ps6    | 0.850208469  | 0.045597276 |
| 17372825 | Olfr1113      | -0.483668194 | 0.045614375 |
| 17437667 | C030018K13Rik | -0.548304182 | 0.0456182   |
| 17210029 |               | -0.75591508  | 0.045621735 |
| 17494179 | Olfr610       | -0.47050476  | 0.045638194 |
| 17529316 | Fam46a        | 0.383647478  | 0.045640768 |
| 17500068 | Sfrp1         | -0.952986884 | 0.045701909 |
| 17268430 | Lrrc46        | 0.439934134  | 0.045716809 |
| 17482678 | 1700069B07Rik | -0.381661825 | 0.045720091 |
| 17414545 | Slc31a1       | 0.356754108  | 0.045720091 |
| 17548587 |               | -0.574839501 | 0.045720091 |
| 17317208 |               | 0.87547034   | 0.045720091 |
| 17381330 | Optn          | 0.421136337  | 0.045722272 |
| 17299857 | Trav12-2      | -0.338252913 | 0.045722272 |
| 17299934 | Trav12-2      | -0.338252913 | 0.045722272 |
| 17361445 | Tmem151a      | -0.429874624 | 0.045725868 |
| 17366338 |               | -0.650365206 | 0.045725868 |
| 17350110 | Rbm27         | 0.473210768  | 0.045742267 |
| 17482072 | A730082K24Rik | -0.358814762 | 0.045773262 |
| 17548585 | Gm4887        | 0.339455891  | 0.045773262 |

|          |               |              |             |
|----------|---------------|--------------|-------------|
| 17288434 | 8030423J24Rik | -0.403593659 | 0.04579618  |
| 17341699 |               | 0.48044868   | 0.04579618  |
| 17508850 | Msr1          | -1.020877061 | 0.045805343 |
| 17228958 | Gm5705        | -0.846530801 | 0.045805712 |
| 17468961 | Nup210        | -0.361362801 | 0.045805738 |
| 17354698 | Cdx1          | -0.472407753 | 0.045815621 |
| 17354036 | Lars          | 0.468485084  | 0.045825332 |
| 17283092 |               | -0.463013896 | 0.045826364 |
| 17457092 | Lrguk         | 0.393440059  | 0.045827537 |
| 17282689 | Acyp1         | -0.43423953  | 0.045829709 |
| 17498673 | Camsap3       | 0.796123588  | 0.045833639 |
| 17400403 | Golph3l       | 0.372521666  | 0.045833639 |
| 17315396 |               | 0.905197597  | 0.045833639 |
| 17305964 | Olfr749       | 0.66462262   | 0.045841129 |
| 17435095 | Fam185a       | 0.443127272  | 0.045841995 |
| 17206043 |               | -0.734120944 | 0.045841995 |
| 17306877 | Adcy4         | -0.576393197 | 0.045876605 |
| 17298057 | D14Abb1e      | 0.430455267  | 0.045876605 |
| 17367004 | Il15ra        | -0.533698532 | 0.045876605 |
| 17269096 | Krt23         | 0.480816946  | 0.045876605 |
| 17447884 | Ldb2          | 0.755025048  | 0.045876605 |
| 17203035 |               | -0.881692023 | 0.045876605 |
| 17227867 | 2310030A07Rik | -0.40325326  | 0.045878016 |
| 17207243 |               | -0.545663608 | 0.045878856 |
| 17278894 | Ppp2r5c       | 0.354810365  | 0.045920781 |
| 17359053 |               | -0.629977616 | 0.045940385 |
| 17408015 | Hist2h3c2     | 0.914709987  | 0.0459698   |
| 17286641 | Dsp           | 0.972692334  | 0.045982642 |
| 17300112 | Trdv1         | -0.479931286 | 0.045982642 |
| 17208039 |               | -0.617895785 | 0.046006256 |
| 17516010 | Fez1          | 0.407531218  | 0.046007105 |
| 17334009 | Zfp946        | 0.773630389  | 0.046009365 |
| 17523630 | Gm17120       | -0.649545831 | 0.046035897 |
| 17290987 | Olfr1362      | -0.535099589 | 0.046035897 |
| 17201873 |               | -0.892135406 | 0.046035897 |
| 17423781 | Pm20d2        | -0.414175485 | 0.046039493 |
| 17493310 |               | -0.620146822 | 0.046123025 |
| 17344866 | Olfr102       | -0.427784664 | 0.046158752 |
| 17253996 | Tmem98        | -0.702666024 | 0.046159225 |
| 17295304 | Gm17352       | -0.776822672 | 0.046161433 |
| 17288616 | Tppp          | 0.496965063  | 0.046166835 |
| 17412045 |               | -0.409902636 | 0.046181098 |
| 17417598 | Eif2b3        | 0.580598347  | 0.04618387  |

|          |               |              |             |
|----------|---------------|--------------|-------------|
| 17310201 | Lmbrd2        | 0.628753554  | 0.046213111 |
| 17245570 | Tmem5         | 0.35839054   | 0.046253536 |
| 17537815 | Gprasp1       | 0.431159848  | 0.046260959 |
| 17467458 |               | -0.748449093 | 0.046260959 |
| 17460643 | Dnajb8        | -0.54968257  | 0.046266422 |
| 17362447 | 9830166K06Rik | -0.517056147 | 0.0463775   |
| 17423665 | Fhl5          | -0.482901786 | 0.0463775   |
| 17415917 |               | -0.602626876 | 0.0463775   |
| 17445359 |               | -0.688036237 | 0.0463775   |
| 17448766 |               | -0.647742392 | 0.046384686 |
| 17294402 | Zfp72         | 0.843008985  | 0.046393336 |
| 17306418 |               | -0.578565118 | 0.046403736 |
| 17328895 |               | 0.56058039   | 0.046403736 |
| 17540102 | Gm14459       | -0.541094922 | 0.04642989  |
| 17549610 | Ercc5         | 0.439337546  | 0.046435994 |
| 17403729 |               | -0.49326146  | 0.046436043 |
| 17520177 | Mthfs         | -0.506280326 | 0.046500944 |
| 17467466 | Igkv4-55      | -0.555492496 | 0.046506903 |
| 17305787 |               | -0.481040683 | 0.046509244 |
| 17364176 | Ankrd1        | 0.709509717  | 0.046544701 |
| 17343823 | Gm20513       | -0.477617415 | 0.046551862 |
| 17380291 | Npepl1        | -0.482591554 | 0.046551862 |
| 17200787 |               | -0.960509252 | 0.04655312  |
| 17210707 |               | -1.305817246 | 0.04655312  |
| 17318650 | Cyhr1         | 0.369440343  | 0.046574267 |
| 17402535 | Gm10650       | -0.833315659 | 0.046574541 |
| 17353576 |               | 0.597392966  | 0.046588233 |
| 17538141 | E230019M04Rik | -0.528647027 | 0.046614523 |
| 17418119 | Mycl1         | 0.507796597  | 0.046614523 |
| 17276940 | Pcnx          | -0.603949119 | 0.046634722 |
| 17319035 | Gm6723        | -0.728283234 | 0.046637763 |
| 17437263 | Med28         | 0.52115884   | 0.046637763 |
| 17298942 |               | -0.994091975 | 0.046637763 |
| 17293484 | Gm3604        | 0.656289464  | 0.04666174  |
| 17278998 | Hsp90aa1      | 0.912010252  | 0.04666174  |
| 17284379 | Igh-VX24      | -0.699843029 | 0.04666174  |
| 17240750 | Ros1          | -0.466051757 | 0.04666174  |
| 17223571 |               | -0.451491837 | 0.046667966 |
| 17294352 | Ahrr          | -0.375255313 | 0.046669776 |
| 17205045 |               | -0.721191091 | 0.046669776 |
| 17209235 |               | -0.721191091 | 0.046669776 |
| 17440325 | Gm10417       | -0.527197729 | 0.046709892 |
| 17204541 |               | -0.583254626 | 0.046711001 |

|          |               |              |             |
|----------|---------------|--------------|-------------|
| 17512854 | Gm17344       | 0.600877259  | 0.046736566 |
| 17522958 | Ctdspl        | 0.532577533  | 0.046749238 |
| 17265724 | Gsg2          | 0.730617909  | 0.046749238 |
| 17202825 |               | 0.901473038  | 0.046749238 |
| 17218449 | Angptl1       | 0.719075033  | 0.046799119 |
| 17204849 |               | 0.706764619  | 0.046799788 |
| 17377831 | Tll9          | -0.441878762 | 0.0468204   |
| 17550841 |               | -0.528930992 | 0.0468204   |
| 17259907 | Tcn2          | 0.369635376  | 0.046886375 |
| 17249097 | Rnf130        | 0.508275487  | 0.046889405 |
| 17326005 | Gm7275        | -0.393265402 | 0.04689452  |
| 17293083 | Mir874        | -0.562684901 | 0.046897289 |
| 17448543 | Gnpda2        | 0.436079147  | 0.046910376 |
| 17483048 | Apobr         | -0.390800336 | 0.046913707 |
| 17483912 | Htra1         | -0.44880735  | 0.046913707 |
| 17514118 | Fam89a        | 0.609118024  | 0.046927344 |
| 17287928 | Naa35         | 0.519831505  | 0.046931221 |
| 17529901 | Slc25a36      | 0.533993812  | 0.046964142 |
| 17329445 | 1110054M08Rik | -0.341647666 | 0.046972472 |
| 17451400 | 1700069L16Rik | -0.564762071 | 0.04698528  |
| 17432749 | 2610305D13Rik | 0.592688187  | 0.04698528  |
| 17337133 | H2-Q7         | -0.520286817 | 0.04698528  |
| 17322230 | Map3k12       | 0.678571761  | 0.04698528  |
| 17204573 |               | 1.06107453   | 0.04698528  |
| 17306865 |               | 0.92635549   | 0.04698528  |
| 17395499 | Hrh3          | -0.474461867 | 0.046998227 |
| 17309264 | 4921525B02Rik | -0.632171784 | 0.046999573 |
| 17539411 |               | -0.482484448 | 0.047012199 |
| 17356108 | Pitpnm1       | -0.450263387 | 0.047021178 |
| 17207921 |               | 0.546770869  | 0.047021178 |
| 17387430 | D030029J20Rik | -0.678876216 | 0.047026519 |
| 17319230 | Ddx17         | 0.37985624   | 0.047026519 |
| 17541563 | Olfr1324      | -0.51328251  | 0.047029581 |
| 17203977 |               | 1.145882973  | 0.047077768 |
| 17421462 | Gm21082       | 0.782699232  | 0.04710977  |
| 17348589 | Mir1948       | -0.530121437 | 0.04710977  |
| 17201819 |               | -0.444512188 | 0.04710977  |
| 17201995 |               | -0.444512188 | 0.04710977  |
| 17306678 | Gm8894        | -0.419999453 | 0.047112293 |
| 17437490 | Rbpj          | -0.471139559 | 0.047112742 |
| 17390997 | Secisbp2l     | -0.36694533  | 0.047112912 |
| 17528913 | Hcrtr2        | -0.522846428 | 0.047115555 |
| 17365347 | Psd           | -0.413411431 | 0.047118732 |

|          |               |              |             |
|----------|---------------|--------------|-------------|
| 17264634 |               | -0.722289975 | 0.047118732 |
| 17357509 |               | 0.347702017  | 0.04713111  |
| 17402932 | Gm9799        | -0.53265227  | 0.047141622 |
| 17285753 | Vmn1r195      | -0.377990724 | 0.047141622 |
| 17209659 |               | -1.081573166 | 0.047141622 |
| 17328093 | Dexi          | 0.406112433  | 0.047171858 |
| 17230153 | Fh1           | 0.411485426  | 0.047171858 |
| 17200703 |               | -0.794349524 | 0.047194989 |
| 17243286 | Hmg20b        | -0.335795155 | 0.047207292 |
| 17398970 | Mef2d         | -0.346663506 | 0.047224795 |
| 17340356 | Ston1         | -0.554414508 | 0.047235369 |
| 17544878 | Morc4         | 0.628116445  | 0.047237176 |
| 17498086 | lfitm10       | -0.465063936 | 0.047260234 |
| 17313075 | Tab1          | 0.552512985  | 0.047263656 |
| 17210317 |               | -0.796434822 | 0.047267969 |
| 17214841 | Agfg1         | 0.337999908  | 0.0472784   |
| 17464718 | Asns          | 0.443569273  | 0.0472784   |
| 17299329 | Lgals3        | -0.520982468 | 0.0472784   |
| 17359488 | Ubsd1         | -0.565298098 | 0.0472784   |
| 17421491 |               | 0.847541596  | 0.0472784   |
| 17324675 |               | -0.711533163 | 0.0472784   |
| 17221260 |               | 0.47718444   | 0.0472784   |
| 17417858 | Mir1957       | 0.986743124  | 0.047283936 |
| 17215291 | 3110079O15Rik | -0.706715583 | 0.047300195 |
| 17271244 | Slc16a6       | -0.54428918  | 0.047379214 |
| 17523574 | Lars2         | 0.33066669   | 0.047382564 |
| 17430997 | Wdtd1         | 0.447570909  | 0.047395264 |
| 17546707 | Gm20824       | -0.737178186 | 0.047409223 |
| 17547146 | Gm20824       | -0.737178186 | 0.047409223 |
| 17245370 | 4930564G21Rik | -0.478208855 | 0.047436296 |
| 17482699 | Scnn1b        | -0.433305562 | 0.047436296 |
| 17492173 | Gm4971        | -0.670441313 | 0.047437826 |
| 17357555 |               | -0.499099685 | 0.047437826 |
| 17261531 | 1700008A04Rik | -0.680452411 | 0.047450477 |
| 17373550 | Trp53i11      | 0.77566      | 0.047450477 |
| 17281459 | Mdga2         | 0.658137738  | 0.047450531 |
| 17429521 | Zfp69         | 0.767081575  | 0.047450531 |
| 17200183 |               | -0.85052779  | 0.047450531 |
| 17540178 | Dynlt3        | 0.459597599  | 0.047479423 |
| 17334356 | Nthl1         | 0.46169816   | 0.047481205 |
| 17319588 | Tnfrsf13c     | -0.382161276 | 0.047483361 |
| 17204095 |               | 1.104963446  | 0.047483361 |
| 17248084 |               | 0.478193336  | 0.047486681 |

|          |               |              |             |
|----------|---------------|--------------|-------------|
| 17461414 | Bhlhe40       | 0.341661055  | 0.0474988   |
| 17214184 | Gm216         | -0.455216933 | 0.047553694 |
| 17433161 |               | -0.50673542  | 0.047553694 |
| 17206341 |               | -0.682756548 | 0.047553694 |
| 17479200 | 1500012K07Rik | -0.374910769 | 0.047566648 |
| 17266619 | 9130204K15Rik | -0.417610847 | 0.047566648 |
| 17267186 | 9530048J24Rik | -0.677174119 | 0.047566648 |
| 17475127 | Cd79a         | -0.501894001 | 0.047566648 |
| 17353320 | Proc          | -0.555201697 | 0.047566648 |
| 17450727 | Tmed5         | 0.359529339  | 0.047566648 |
| 17200855 |               | -1.039957164 | 0.047566648 |
| 17204471 |               | -1.207071738 | 0.047566648 |
| 17549456 | Neat1         | 0.630598171  | 0.047584353 |
| 17268107 | Sgca          | -0.407255665 | 0.047584353 |
| 17366497 | Sephs1        | 0.426465154  | 0.047662806 |
| 17333344 | Snora20       | 0.639933777  | 0.047669419 |
| 17522328 | Elp6          | 0.436487343  | 0.047687524 |
| 17216777 |               | 0.462020935  | 0.047712587 |
| 17434966 | Speer4f       | -0.420912635 | 0.04771477  |
| 17277424 | Ttll5         | 0.480838489  | 0.04771477  |
| 17323071 |               | 0.445292898  | 0.047719655 |
| 17237952 | F420014N23Rik | -0.551892018 | 0.047724993 |
| 17204769 |               | 1.094722903  | 0.047754969 |
| 17483696 | Tgfb1i1       | -0.46283578  | 0.047757055 |
| 17310801 |               | -0.345128372 | 0.047757055 |
| 17405674 |               | 0.340522483  | 0.047793704 |
| 17487457 | Bcl3          | -0.4316992   | 0.047833594 |
| 17529099 | Col12a1       | -0.814824575 | 0.047833594 |
| 17437043 | Cytl1         | -0.340182589 | 0.047833594 |
| 17238295 | Gls2          | 0.685286366  | 0.047833594 |
| 17325723 | Zbtb20        | -1.197713341 | 0.047833594 |
| 17237343 | 1700010J16Rik | -0.437042092 | 0.047851039 |
| 17444309 | Grid2ip       | -0.461882762 | 0.047851039 |
| 17509052 | Klkb1         | -0.464871888 | 0.047851039 |
| 17426700 | Mpdz          | -0.540041383 | 0.047851039 |
| 17374848 | Nusap1        | -0.706202735 | 0.047851039 |
| 17550138 | Nusap1        | -0.706202735 | 0.047851039 |
| 17469121 | Prickle2      | -0.462967298 | 0.047851039 |
| 17362383 | Slc22a27      | -0.440630093 | 0.047851039 |
| 17238359 | Apon          | -0.440194782 | 0.047857931 |
| 17254547 | Bcas3         | 0.518368655  | 0.047857931 |
| 17302113 | Enox1         | 0.364520047  | 0.047857931 |
| 17323659 | Trmt2a        | 0.635714759  | 0.047857931 |



|          |               |              |             |
|----------|---------------|--------------|-------------|
| 17358836 |               | -0.774440413 | 0.047857931 |
| 17243303 | 4930404N11Rik | -0.451375073 | 0.047891687 |
| 17457330 | Akr1d1        | -0.476346587 | 0.047891687 |
| 17248491 | Gm12127       | -0.480999171 | 0.047891687 |
| 17201007 |               | 1.095446445  | 0.047891687 |
| 17523281 | Trak1         | -0.408380749 | 0.047893432 |
| 17344939 | Pgk2          | -0.587727837 | 0.047938155 |
| 17458911 | Fkbp9         | 0.355935702  | 0.047950558 |
| 17391623 | Cpxm1         | -0.812112524 | 0.047951776 |
| 17425296 | Olfr272       | -0.360068784 | 0.047957908 |
| 17281099 | Sptssa        | 0.484229007  | 0.047957908 |
| 17512121 | Cdh8          | 0.629167511  | 0.047962567 |
| 17243278 | Gipc3         | -0.534265016 | 0.047962567 |
| 17423314 | Gm11831       | -0.573104938 | 0.047965133 |
| 17209743 |               | -0.697554292 | 0.048001065 |
| 17367765 | Pnpla7        | -0.443305095 | 0.048010683 |
| 17335459 | Srsf3         | 0.467861364  | 0.048010683 |
| 17203319 |               | 0.866125645  | 0.048010683 |
| 17548104 | Hps1          | -0.505458084 | 0.048016389 |
| 17486399 | Vmn2r49       | -0.590996891 | 0.048016389 |
| 17201617 |               | -0.878860266 | 0.048020429 |
| 17202149 |               | 1.0768978    | 0.048026087 |
| 17243644 | Cry1          | 0.554922951  | 0.048033415 |
| 17526377 | Ttc36         | -0.749014138 | 0.04806367  |
| 17206095 |               | -1.468283429 | 0.048066685 |
| 17263724 | Aldh3a2       | 0.384212102  | 0.048071779 |
| 17511130 | Ier2          | 0.491037052  | 0.048077029 |
| 17202289 |               | 1.541642212  | 0.048077029 |
| 17254028 | 5530401A14Rik | -0.540873497 | 0.04808381  |
| 17204753 |               | 1.210773984  | 0.048092412 |
| 17215345 | Atg16l1       | 0.437371066  | 0.048092502 |
| 17245709 | Os9           | 0.500222616  | 0.048092502 |
| 17348202 | Zeb1          | -0.453640436 | 0.048095123 |
| 17237092 |               | -0.484716092 | 0.048095123 |
| 17204635 |               | -0.952956036 | 0.048107771 |
| 17482095 | Nucb2         | 0.379520386  | 0.048111576 |
| 17389795 | Ccdc32        | 0.479012273  | 0.048132891 |
| 17401433 | Wdr77         | 0.459236651  | 0.048137446 |
| 17548096 | Sf3b2         | -0.396492879 | 0.048139046 |
| 17205787 |               | 1.181947241  | 0.048139046 |
| 17341179 | Dll1          | 0.404350694  | 0.048155022 |
| 17339215 | Gm20742       | -0.568124903 | 0.048157885 |
| 17268523 | Gpr179        | -0.572954803 | 0.048174016 |

|          |               |              |             |
|----------|---------------|--------------|-------------|
| 17327426 |               | -0.790207813 | 0.048174016 |
| 17489420 | Fxyd1         | -0.753640825 | 0.048241355 |
| 17274088 | Rad51ap2      | -0.499945629 | 0.048246325 |
| 17331102 | Nit2          | 0.468654133  | 0.048251442 |
| 17415391 | Gm12609       | -0.508127699 | 0.048329103 |
| 17515375 | Prkcsh        | 0.403316717  | 0.048329103 |
| 17531050 | Rbm6          | 0.467925523  | 0.048358406 |
| 17333589 | Chd1          | 0.446666636  | 0.048379425 |
| 17379011 | Top1          | 0.466466228  | 0.048384188 |
| 17279054 | Rcor1         | 0.418611898  | 0.048401536 |
| 17256857 | 4930417O22Rik | -0.494648717 | 0.048406217 |
| 17288194 | Zfp369        | 0.551301783  | 0.048457553 |
| 17326208 | Cblb          | -0.473949361 | 0.048469336 |
| 17279941 | 1700022H16Rik | -0.422249015 | 0.048470414 |
| 17433893 |               | 0.502950478  | 0.048470414 |
| 17444009 | C130050O18Rik | -0.381627058 | 0.048478366 |
| 17470592 | Gdf3          | -0.434800184 | 0.048478366 |
| 17293469 |               | -0.659995846 | 0.048513604 |
| 17442332 | Kntc1         | 0.404538222  | 0.048515579 |
| 17528983 | Fbxo9         | 0.381665135  | 0.048529855 |
| 17550733 |               | -0.619556826 | 0.048529855 |
| 17325339 | 2010005H15Rik | 0.69516472   | 0.048535241 |
| 17537345 | Gm14920       | -0.449913924 | 0.048535241 |
| 17269158 | Krtap2-4      | -0.480924081 | 0.048540643 |
| 17237603 | 1700025F24Rik | -0.416253967 | 0.048542696 |
| 17321440 | Lmbr1l        | 0.465541221  | 0.048542696 |
| 17313538 | Sept3         | 0.704636756  | 0.048542696 |
| 17208211 |               | 0.623391515  | 0.048542696 |
| 17320684 |               | -0.687891616 | 0.048542696 |
| 17547996 |               | -0.578466907 | 0.048551417 |
| 17310882 | Cpq           | 0.686721158  | 0.048559052 |
| 17231604 | LOC101056021  | -0.748056155 | 0.048596795 |
| 17466075 | Jhdm1d        | 0.491932873  | 0.048611403 |
| 17226953 | Mdm4          | 0.72046978   | 0.048611403 |
| 17349421 | n-R5s24       | -0.443801155 | 0.048611403 |
| 17385710 |               | -1.194889844 | 0.048611403 |
| 17400805 |               | 0.324416213  | 0.048626206 |
| 17543286 | Spin4         | 0.783011617  | 0.04862865  |
| 17491701 | A230057D06Rik | 0.529531426  | 0.048642867 |
| 17370057 | Gm13530       | -0.561151708 | 0.048642867 |
| 17508516 | Brf2          | 0.609712595  | 0.048657004 |
| 17299979 | Trav6-3       | 1.057105272  | 0.048670126 |
| 17290935 |               | 1.095871958  | 0.048706605 |

|          |               |              |             |
|----------|---------------|--------------|-------------|
| 17463579 | Gm17631       | 0.754291456  | 0.048713332 |
| 17355270 | 4930546C10Rik | -0.467847591 | 0.048726795 |
| 17212970 | Sgol2         | 0.422386104  | 0.048731926 |
| 17548166 | Gatm          | -0.441508343 | 0.048752136 |
| 17533253 | Otc           | -0.454971038 | 0.048776954 |
| 17210065 |               | -0.990809484 | 0.048855222 |
| 17310078 | Nup155        | 0.547770695  | 0.048959218 |
| 17231495 | Oprm1         | -0.379087815 | 0.048964864 |
| 17372197 | Osbpl6        | 0.963593255  | 0.048979111 |
| 17431836 | Gm13030       | -0.581537474 | 0.04901187  |
| 17282963 |               | 0.486267932  | 0.04901187  |
| 17542732 | Gab3          | -0.429757804 | 0.049036061 |
| 17418059 | Col9a2        | -0.443863811 | 0.049057249 |
| 17373417 | Ambra1        | -0.391081507 | 0.049073572 |
| 17324693 |               | -0.449869101 | 0.049088274 |
| 17510338 | Plvap         | -0.51311523  | 0.049091912 |
| 17333744 | Vmn2r124      | -0.493742233 | 0.049097461 |
| 17380096 | Gm14273       | -0.696186093 | 0.04916225  |
| 17438832 | Slc4a4        | -0.609769825 | 0.04916225  |
| 17423133 |               | -0.480252658 | 0.04916225  |
| 17342785 | D17Wsu92e     | 0.297543787  | 0.04922113  |
| 17248371 | Gm12120       | -0.590455534 | 0.04922113  |
| 17222788 | Gm3852        | -0.496248502 | 0.04922113  |
| 17200869 |               | -0.794320153 | 0.04922113  |
| 17204929 |               | -0.924953311 | 0.049252701 |
| 17332340 |               | -0.836537756 | 0.049267929 |
| 17284358 | Ighj2         | -0.531289711 | 0.049279208 |
| 17549168 |               | -0.786928646 | 0.04929852  |
| 17506546 | 4732415M23Rik | -0.489143599 | 0.049307616 |
| 17250468 | Gm12620       | -0.638339517 | 0.049307616 |
| 17306680 | Nrl           | -0.726306006 | 0.049307616 |
| 17255572 | Hoxb7         | -0.409688758 | 0.049309007 |
| 17209705 |               | 1.215181885  | 0.049309185 |
| 17549186 | LOC640793     | -0.574274941 | 0.049317263 |
| 17319401 | Snord83b      | -1.448005548 | 0.049318734 |
| 17337888 |               | 0.402039553  | 0.049344628 |
| 17201709 |               | -0.919224445 | 0.049358601 |
| 17201885 |               | -0.919224445 | 0.049358601 |
| 17370947 | Gm13544       | -0.434563885 | 0.049358903 |
| 17501652 | Atp6v1b2      | 0.502276143  | 0.049372383 |
| 17295377 | LOC101055909  | -0.746112824 | 0.049372383 |
| 17200653 |               | 0.598176676  | 0.049373811 |
| 17516993 | Nxpe4         | 0.370896151  | 0.04940377  |

|          |               |              |             |
|----------|---------------|--------------|-------------|
| 17204145 |               | 0.965038699  | 0.04940377  |
| 17310772 | Ctnnd2        | 0.625475514  | 0.049407533 |
| 17448799 |               | 1.275734194  | 0.04940796  |
| 17539346 | Rs1           | -0.533312474 | 0.049414019 |
| 17286717 | Mir5124       | 0.732623527  | 0.049427733 |
| 17353663 | Tmem173       | -0.972971345 | 0.049427733 |
| 17250682 | Pigl          | 0.532755261  | 0.049447783 |
| 17551167 |               | -0.400536265 | 0.049447783 |
| 17307493 | Spryd7        | 0.29120462   | 0.049505634 |
| 17232786 | Wasf1         | -0.559994608 | 0.049505634 |
| 17529043 | 4930542C12Rik | -0.418644607 | 0.049524217 |
| 17444052 | Gm16122       | -0.362167807 | 0.049524217 |
| 17300376 | Il25          | -0.357481308 | 0.049524217 |
| 17446828 | Trim54        | -0.51284642  | 0.049524217 |
| 17535448 | Zfp185        | 0.708561452  | 0.049524217 |
| 17200719 |               | 1.576930953  | 0.049524217 |
| 17421327 | Gm13227       | -0.607714572 | 0.049530947 |
| 17521570 | Cdhr4         | -0.452985815 | 0.04954705  |
| 17289584 | Cenpk         | 0.647916007  | 0.049571013 |
| 17419853 | Gm12984       | -0.513508009 | 0.049573663 |
| 17505114 | Zfp90         | 0.394203183  | 0.049573663 |
| 17489917 | Gm6818        | -0.696520572 | 0.049582014 |
| 17220919 | A130010J15Rik | 0.534161126  | 0.049582433 |
| 17548761 | Gm10144       | -0.964875914 | 0.04958547  |
| 17322997 | Ercc4         | 0.42674511   | 0.049611117 |
| 17492523 | Unc45a        | 0.577828752  | 0.049611117 |
| 17427635 | C130073F10Rik | -0.356099767 | 0.049622794 |
| 17462843 | Cd163         | -0.496013752 | 0.049622794 |
| 17279893 | Klhl29        | -0.744485683 | 0.049622794 |
| 17458315 | Lrrc61        | 0.689299271  | 0.049622794 |
| 17401985 |               | -0.433138329 | 0.049622794 |
| 17314682 |               | 0.690603596  | 0.049622794 |
| 17211566 |               | 0.507802219  | 0.049629991 |
| 17201777 |               | -0.686491652 | 0.049647778 |
| 17201953 |               | -0.686491652 | 0.049647778 |
| 17465339 |               | -0.63663196  | 0.049662632 |
| 17427729 | C8a           | -0.335787503 | 0.049667372 |
| 17307074 | Gm16973       | 0.443485898  | 0.04968336  |
| 17461923 | Syn2          | 0.522207565  | 0.04968336  |
| 17419731 | Trim63        | -0.63585327  | 0.04968336  |
| 17269143 | Krtap1-4      | -0.639389586 | 0.04969893  |
| 17241032 | Ddit4         | 0.455114733  | 0.0496999   |
| 17269866 | Gm11619       | -0.66317251  | 0.049700511 |

|          |               |              |             |
|----------|---------------|--------------|-------------|
| 17519498 | Bcl2l10       | -0.583837361 | 0.049726266 |
| 17426447 | Cdk5rap2      | 0.519668338  | 0.04975445  |
| 17335352 | Clpsl2        | -0.657303049 | 0.04975445  |
| 17294547 | Nr2f1         | 0.560329921  | 0.04975445  |
| 17355086 | Cplx4         | -0.596950613 | 0.049755071 |
| 17208395 |               | -1.005602653 | 0.049755071 |
| 17216870 | Ubxn4         | 0.3446614    | 0.049779653 |
| 17204987 |               | 1.170175556  | 0.049779653 |
| 17206483 |               | 1.925969198  | 0.049779653 |
| 17266287 |               | -0.594623433 | 0.049802471 |
| 17243219 | Nmrk2         | -0.53836809  | 0.049805629 |
| 17254019 | 4930527B05Rik | -0.390110128 | 0.04981939  |
| 17547351 | Gm21530       | -0.348633431 | 0.04981939  |
| 17547378 | Gm21530       | -0.348633431 | 0.04981939  |
| 17516649 | Treh          | -0.351579312 | 0.04981939  |
| 17203543 |               | -1.638156622 | 0.04981939  |
| 17444137 | Amz1          | -0.357474629 | 0.049823428 |
| 17247882 | Gm12069       | -0.631954596 | 0.049823428 |
| 17432535 | Pramel5       | -0.501729646 | 0.049823428 |
| 17437425 | Anapc4        | 0.329275714  | 0.049835538 |
| 17247494 | Gm19396       | -0.456817214 | 0.049835538 |
| 17256279 | LOC101056001  | -0.432325161 | 0.049835538 |
| 17400638 | Pex11b        | 0.366694833  | 0.049835538 |
| 17297889 | Dennd6a       | 0.365269762  | 0.049837576 |
| 17243520 | 1700025N21Rik | -0.420525177 | 0.049877354 |
| 17409142 | Gstm2         | -0.50261221  | 0.049877354 |
| 17315200 | Krt7          | 0.352680299  | 0.049877354 |
| 17356356 | Rin1          | -0.499753065 | 0.049877354 |
| 17286870 | Sirt5         | 0.59566724   | 0.04987806  |
| 17435737 | Gareml        | -0.511412818 | 0.049892801 |
| 17249034 |               | -0.863886189 | 0.049892801 |
| 17347663 | C430042M11Rik | 0.557846118  | 0.049896076 |
| 17278251 |               | -0.434386427 | 0.049898859 |
| 17501075 | Gm10083       | -0.562489691 | 0.049929157 |
| 17230225 | Hmga2-ps1     | -0.425630743 | 0.049929157 |
| 17405154 | Maml3         | 0.431881638  | 0.049953747 |
| 17350671 | Gm5507        | -0.536138316 | 0.049967649 |
| 17478598 | Gm21571       | -1.161151076 | 0.049981779 |
| 17245692 | March9        | -0.360178126 | 0.049981779 |
| 17496627 | Sept1         | -0.441314353 | 0.049981779 |
| 17226874 | Tmcc2         | -0.363195427 | 0.049981779 |
| 17394211 | Wfdc8         | -0.538930648 | 0.049981779 |
| 17548616 | Gm6415        | 0.362683375  | 0.049991586 |

---
