# Supplementary material
Source: PubMed Central journal article supplement (PMC5995268)

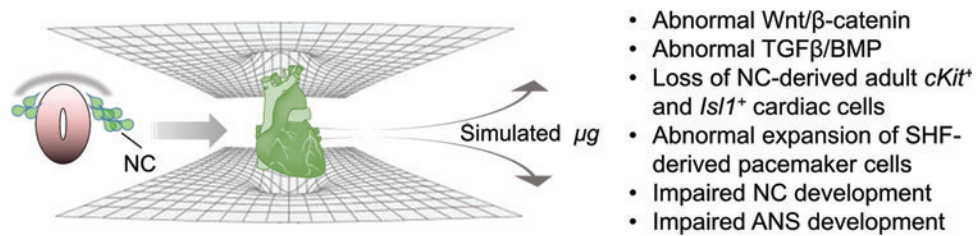

**SUPPLEMENTARY FIG. S3.** Summary Figure of the experimental findings.

Supplement: Supp_Fig3.pdf [file Supp_Fig3.pdf]
